# Supplementary material for: Comparative Transcriptomics and Methylomics Reveal Adaptive Responses of Digestive and Metabolic Genes to Dietary Shift in Giant and Red Pandas
Source: Genes (Basel). 2022 Aug 14;13(8):1446. doi: 10.3390/genes13081446 (PMC9407821; doi:10.3390/genes13081446)
Supplement: Supplementary file 1 [file genes-13-01446-s001.zip › Supplementary tables.xlsx]

## Sheet: Guide
Guide for supplementary tables
Table S1 Description of the 32 RNA-seq libraries for five mammals used in this study
Table S2 Statistics of orthologous gene numbers detected using Orthofinder software
Table S3 Sequence coverage of orthologous genes among five species
Table S4 Identity of orthologous genes among five species
Table S5 Normalized expression levels of 306 convergent DEGs in stomach samples of two panda species
Table S6 Normalized expression levels of 150 convergent DEGs in small intestine samples of two panda species
Table S7 Significantly enriched GO categories for up-regulated convergent DEGs in stomach samples of two panda species
Table S8 Significantly enriched GO categories for down-regulated convergent DEGs in stomach samples of two panda species
Table S9 Significantly enriched GO categories for down-regulated convergent DEGs in small intestine samples of two panda species
Table S10 Significantly enriched KEGG pathways for down-regulated convergent DEGs in small intestine samples of two panda species
Table S11 Description of the 20 BS-seq libraries for three mammals used in this study
Table S12 The proportion of C sites in the genomes of giant panda, red panda and ferret covered by at least 1 and 5 unique reads
Table S13 Significantly enriched GO categories for hypomethylated convergent promoters in stomach samples of two panda species
Table S14 Significantly enriched GO categories for hypermethylated convergent promoters in stomach samples of two panda species
Table S15 Significantly enriched KEGG pathways for hypermethylated convergent promoters in stomach samples of two panda species
Table S16 Significantly enriched GO categories for hypomethylated convergent promoters in small intestine samples of two panda species
Table S17 Significantly enriched GO categories for hypermethylated convergent promoters in small intestine samples of two panda species
Table S18 DEGs associated with carbohydrate utilization, bile secretion, lipid absorption, Arg and Lys metabolism, vitamin B12 utilization and cyanide detoxification in stomach and small intestine

## Sheet: Table S1
Table S1 Description of the 32 RNA-seq libraries for five mammals used in this study
Scientific name	Sample ID	Tissue	Developmental stage	Sex	Read length (bp)	Layout	Sequencing platform	Total clean data (reads)	Total clean data (G)	Database, genome version	aligned reads (%)	SRA accessions
Ailuropoda melanoleuca	aml_9775	Stomach	Adult	Female	150	Paired	Illumina HiSeq 2000	30643376	9.19301	NCBI, ASM200744v2	93.45	SRR20591083
Ailuropoda melanoleuca	aml_JV	Stomach	Adult	Male	150	Paired	Illumina HiSeq 2000	25845942	7.75378	NCBI, ASM200744v2	90.65	SRR20591082
Ailuropoda melanoleuca	aml_WE	Stomach	Adult	Male	150	Paired	Illumina HiSeq 2000	20624647	6.18739	NCBI, ASM200744v2	94.31	SRR20591071
Ailuropoda melanoleuca	aml_9552	Small intestine	Adult	Male	150	Paired	Illumina HiSeq 2000	20727485	6.21825	NCBI, ASM200744v2	90.74	SRR20591060
Ailuropoda melanoleuca	aml_PXC	Small intestine	Adult	Male	150	Paired	Illumina HiSeq 2000	19839052	5.95172	NCBI, ASM200744v2	94.02	SRR20591051
Ailuropoda melanoleuca	aml_XC	Small intestine	Adult	Male	150	Paired	Illumina HiSeq 2000	21326583	6.39797	NCBI, ASM200744v2	91.79	SRR20591050
Ailurus fulgens	afu_5808	Stomach	Adult	Female	150	Paired	Illumina HiSeq 2000	36265027	10.8795	DNA ZOO	86.76	SRR20591049
Ailurus fulgens	afu_5809	Stomach	Adult	Female	150	Paired	Illumina HiSeq 2000	35563498	10.669	DNA ZOO	86.54	SRR20591048
Ailurus fulgens	afu_5815	Stomach	Adult	Female	150	Paired	Illumina HiSeq 2000	28690241	8.60707	DNA ZOO	84.21	SRR20591047
Ailurus fulgens	afu_5812	Small intestine	Adult	Female	150	Paired	Illumina HiSeq 2000	25181082	7.55432	DNA ZOO	81.91	SRR20591046
Ailurus fulgens	afu_CC	Small intestine	Adult	Female	150	Paired	Illumina HiSeq 2000	23770452	7.13114	DNA ZOO	85.13	SRR20591081
Ailurus fulgens	afu_Z133	Small intestine	Adult	Male	150	Paired	Illumina HiSeq 2000	30204920	9.06148	DNA ZOO	79.52	SRR20591080
Mustela putorius furo	mpf_W1	Stomach	Adult	Male	150	Paired	Illumina HiSeq 2000	21998788	6.59964	Ensembl, release 101	82.73	SRR20591079
Mustela putorius furo	mpf_W2	Stomach	Adult	Female	150	Paired	Illumina HiSeq 2000	24203196	7.26096	Ensembl, release 101	80.5	SRR20591078
Mustela putorius furo	mpf_W3	Stomach	Adult	Male	150	Paired	Illumina HiSeq 2000	25979889	7.79397	Ensembl, release 101	81.55	SRR20591077
Mustela putorius furo	mpf_XC1	Small intestine	Adult	Male	150	Paired	Illumina HiSeq 2000	24815321	7.4446	Ensembl, release 101	80.84	SRR20591076
Mustela putorius furo	mpf_XC2	Small intestine	Adult	Female	150	Paired	Illumina HiSeq 2000	29465913	8.83977	Ensembl, release 101	82.78	SRR20591075
Mustela putorius furo	mpf_XC3	Small intestine	Adult	Male	150	Paired	Illumina HiSeq 2000	25294626	7.58839	Ensembl, release 101	82.99	SRR20591074
Canis lupus familiaris	cfa_7018	Stomach	Adult	Male	100	Paired	Illumina HiSeq 2500	53491095	10.6982	Ensembl, release 101	98.7	SRR8997018
Canis lupus familiaris	cfa_7045	Stomach	Adult	Male	100	Paired	Illumina HiSeq 2500	51634122	10.3268	Ensembl, release 101	98.19	SRR8997045
Canis lupus familiaris	cfa_7050	Stomach	Adult	Male	150	Paired	Illumina HiSeq 2500	116519274	34.9558	Ensembl, release 101	85.78	SRR8997050
Canis lupus familiaris	cfa_7031	Small intestine	Adult	Male	100	Paired	Illumina HiSeq 2500	40004518	8.0009	Ensembl, release 101	97.06	SRR8997031
Canis lupus familiaris	cfa_7056	Small intestine	Adult	Male	150	Paired	Illumina HiSeq 2500	51079477	15.3238	Ensembl, release 101	96.21	SRR8997056
Canis lupus familiaris	cfa_6987	Small intestine	Adult	Male	100	Paired	Illumina HiSeq 2500	25935183	5.18704	Ensembl, release 101	91.75	SRR8996987
Canis lupus familiaris	cfa_9348	Small intestine	Adult	Male	100	Paired	Illumina HiSeq 2500	40533003	8.1066	Ensembl, release 101	92.12	SRR5889348
Mus musculus	mmu_1443	Stomach	Adult	None	50	Paired	Illumina HiSeq 1000	77358771	7.73588	Ensembl, release 101	97.72	SRR5031443
Mus musculus	mmu_1444	Stomach	Adult	None	50	Paired	Illumina HiSeq 1000	81354862	8.13549	Ensembl, release 101	97.23	SRR5031444
Mus musculus	mmu_1445	Stomach	Adult	None	50	Paired	Illumina HiSeq 1000	75161595	7.51616	Ensembl, release 101	97.67	SRR5031445
Mus musculus	mmu_1890	Stomach	Adult	Male	150	Paired	Illumina HiSeq 2000	27716217	8.31487	Ensembl, release 101	93.75	SRR7641890
Mus musculus	mmu_0610	Small intestine	Adult	Female	150	Paired	Illumina HiSeq 4000	43589038	13.0767	Ensembl, release 101	92.85	SRR8570610
Mus musculus	mmu_0611	Small intestine	Adult	Female	150	Paired	Illumina HiSeq 4000	42779572	12.8339	Ensembl, release 101	89.37	SRR8570611
Mus musculus	mmu_0612	Small intestine	Adult	Female	150	Paired	Illumina HiSeq 4000	46648743	13.9946	Ensembl, release 101	94.57	SRR8570612

## Sheet: Table S2
Table S2 Statistics of orthologous gene numbers detected using Orthofinder software
	Orthologous gene numbers
giant panda VS red panda VS ferret VS dog VS mouse	10121
giant panda VS red panda VS ferret	10984
giant panda VS ferret	12130
giant panda VS dog	12270
giant panda VS mouse	13217
red panda VS ferret	10710
red panda VS dog	10715
red panda VS mouse	11190
giant panda VS red panda	11186

## Sheet: Table S3
Table S3 Sequence coverage of orthologous genes among five species
Orthologous gene	Dog VS ferret (sequence coverage%)	Dog VS giant panda (sequence coverage%)	Dog VS mouse (sequence coverage%)	Dog VS red panda (sequence coverage%)	Ferret VS giant panda (sequence coverage%)	Ferret VS mouse (sequence coverage%)	Ferret VS red panda (sequence coverage%)	Giant panda VS mouse (sequence coverage%)	Giant panda VS red panda (sequence coverage%)	Mouse VS red panda (sequence coverage%)	Average (sequence coverage%)
E2F3	100.0|100.0	100.0|100.0	97.06|72.21	100.0|98.28	100.0|100.0	97.06|72.21	100.0|98.28	98.8|72.21	100.0|98.28	72.65|95.4	93.62
UBE3B	88.78|88.39	93.37|95.31	93.55|98.97	93.37|98.97	89.8|92.06	88.57|94.11	88.39|94.1	96.48|100.0	96.3|100.0	100.0|100.0	94.53
FBXL22	100.0|100.0	100.0|88.14	94.17|88.98	100.0|78.25	100.0|88.14	95.07|89.83	100.0|78.25	83.79|89.83	94.07|83.51	89.83|74.39	90.81
LOXL2	100.0|100.0	100.0|97.26	99.74|99.48	100.0|100.0	100.0|97.14	100.0|100.0	100.0|100.0	97.51|100.0	97.14|100.0	99.87|99.36	99.38
PRSS36	100.0|100.0	99.88|100.0	100.0|99.77	100.0|100.0	100.0|100.0	100.0|100.0	100.0|100.0	100.0|99.65	100.0|99.88	99.88|100.0	99.95
COMTD1	100.0|100.0	100.0|100.0	100.0|100.0	67.94|100.0	100.0|100.0	100.0|100.0	67.94|100.0	100.0|100.0	67.94|100.0	67.94|100.0	93.59
RRP12	100.0|100.0	100.0|100.0	99.92|100.0	100.0|100.0	100.0|100.0	100.0|100.0	100.0|100.0	100.0|100.0	100.0|100.0	100.0|100.0	100
C6H10orf71	100.0|100.0	100.0|100.0	100.0|100.0	100.0|100.0	100.0|100.0	100.0|100.0	100.0|100.0	100.0|100.0	100.0|100.0	100.0|100.0	100
GUCY2D	98.98|96.22	98.89|96.21	98.98|96.39	94.35|100.0	100.0|100.0	100.0|100.0	91.8|100.0	100.0|100.0	91.79|100.0	91.79|100.0	97.77
ELF2	81.45|90.71	81.45|89.02	81.92|89.38	76.66|93.06	100.0|100.0	100.0|100.0	83.13|90.62	100.0|100.0	81.59|90.62	81.96|91.18	90.14
ECM1	100.0|99.11	100.0|100.0	100.0|100.0	100.0|95.94	96.99|100.0	99.82|100.0	97.52|97.17	100.0|100.0	100.0|95.94	100.0|99.12	99.08
ALAS1	90.96|100.0	82.69|100.0	82.95|100.0	91.6|100.0	90.91|100.0	91.19|100.0	100.0|100.0	100.0|100.0	100.0|91.51	100.0|91.8	95.68
TM9SF4	99.38|100.0	100.0|96.83	100.0|100.0	99.84|99.69	100.0|96.23	100.0|99.38	99.84|99.07	96.98|100.0	96.08|99.07	99.07|99.07	99.03
JADE3	98.8|100.0	99.04|100.0	98.8|99.88	98.8|100.0	100.0|100.0	100.0|99.88	100.0|100.0	100.0|100.0	100.0|100.0	99.88|100.0	99.75
GAS2L1	94.85|100.0	94.85|100.0	95.26|100.0	100.0|100.0	100.0|100.0	100.0|100.0	100.0|95.78	100.0|100.0	100.0|95.78	100.0|96.2	98.64
MRS2	93.84|86.0	93.84|86.0	95.32|89.17	94.83|86.13	100.0|100.0	100.0|100.0	100.0|100.0	100.0|100.0	100.0|100.0	100.0|100.0	96.26
ATXN1	96.31|100.0	96.79|100.0	97.5|100.0	97.27|100.0	100.0|100.0	100.0|100.0	100.0|100.0	100.0|100.0	100.0|100.0	100.0|100.0	99.39
FOXJ1	100.0|100.0	100.0|100.0	100.0|100.0	100.0|100.0	100.0|100.0	100.0|100.0	100.0|100.0	100.0|100.0	100.0|100.0	100.0|100.0	100
KCNK1	85.55|93.99	85.16|64.88	84.38|64.29	53.52|74.46	96.14|66.67	95.28|66.07	57.51|72.83	99.11|99.11	44.35|80.98	44.35|80.98	75.48
CDK15	100.0|100.0	100.0|100.0	100.0|100.0	100.0|100.0	100.0|100.0	100.0|100.0	100.0|100.0	100.0|100.0	100.0|100.0	100.0|100.0	100
SF3B4	55.19|55.19	55.19|55.19	55.19|55.19	55.19|55.19	55.19|55.19	55.19|55.19	55.19|55.19	55.19|55.19	55.19|55.19	55.19|55.19	55.19
C12H19orf54	81.6|79.48	97.92|82.71	82.2|76.73	81.6|78.35	100.0|100.0	100.0|100.0	99.71|98.29	83.96|92.8	99.5|100.0	76.73|78.92	89.53
MCTP1	70.88|100.0	100.0|76.15	100.0|79.92	63.03|100.0	100.0|53.41	96.64|51.42	93.48|99.79	93.59|98.21	47.49|100.0	49.84|100.0	83.69
TBX6	100.0|100.0	100.0|100.0	100.0|100.0	100.0|100.0	100.0|100.0	100.0|100.0	100.0|100.0	100.0|100.0	100.0|100.0	100.0|100.0	100
LOC100473665	92.25|95.97	89.67|95.86	90.04|95.13	90.77|96.66	97.31|100.0	98.66|100.0	97.7|100.0	100.0|100.0	100.0|99.61	100.0|100.0	96.98
CARM1	83.43|100.0	84.99|100.0	82.29|89.25	70.96|74.66	100.0|97.38	100.0|92.01	91.92|76.3	100.0|88.48	85.14|72.58	79.26|76.9	87.28
GFRA1	99.79|99.79	99.79|99.79	99.79|99.79	69.02|99.69	100.0|100.0	100.0|100.0	69.23|100.0	100.0|100.0	69.23|100.0	69.23|100.0	93.76
ADAT1	83.94|87.1	83.94|86.76	82.6|86.57	83.94|86.93	100.0|100.0	100.0|100.0	100.0|100.0	99.21|100.0	100.0|100.0	100.0|99.41	94.02
CST6	100.0|99.34	100.0|99.33	100.0|100.0	100.0|99.34	100.0|100.0	99.34|100.0	100.0|100.0	99.33|100.0	100.0|100.0	100.0|99.34	99.8
PCYOX1	100.0|100.0	100.0|100.0	100.0|100.0	100.0|100.0	100.0|100.0	100.0|100.0	100.0|100.0	100.0|100.0	100.0|100.0	100.0|100.0	100
COG1	91.21|81.77	100.0|96.33	100.0|96.53	100.0|96.23	82.43|88.57	82.91|89.08	82.43|88.48	100.0|100.0	100.0|100.0	100.0|100.0	93.8
CDC123	57.14|100.0	57.14|100.0	57.14|100.0	57.14|100.0	100.0|100.0	100.0|100.0	100.0|100.0	100.0|100.0	100.0|100.0	100.0|100.0	91.43
KCNK6	88.67|98.74	63.46|46.38	88.67|100.0	88.67|100.0	70.66|46.38	98.74|100.0	98.74|100.0	46.17|71.25	46.38|71.57	100.0|100.0	81.22
LOC100474931	100.0|100.0	74.49|58.61	92.1|76.4	100.0|85.58	73.39|58.79	90.47|76.4	97.78|83.68	51.69|54.49	59.33|63.38	76.4|77.42	77.52
RHOU	67.05|100.0	78.68|58.17	100.0|99.23	60.85|98.12	100.0|49.57	98.84|65.52	90.75|98.12	57.88|77.39	44.99|98.12	59.39|96.88	79.98
PPCDC	84.69|86.76	84.69|70.8	84.69|86.76	84.69|86.76	95.59|78.0	100.0|100.0	100.0|100.0	71.2|87.25	78.0|95.59	100.0|100.0	88.77
SIX2	100.0|100.0	100.0|100.0	100.0|100.0	100.0|100.0	100.0|100.0	100.0|100.0	100.0|100.0	100.0|100.0	100.0|100.0	100.0|100.0	100
KCTD20	100.0|100.0	100.0|91.68	100.0|100.0	100.0|87.84	100.0|91.68	100.0|100.0	100.0|87.84	91.68|100.0	94.97|90.99	100.0|87.84	96.23
ACCS	95.8|100.0	95.8|100.0	95.8|100.0	95.8|100.0	100.0|100.0	100.0|100.0	100.0|100.0	100.0|100.0	100.0|100.0	100.0|100.0	99.16
ASAP2	95.24|100.0	82.26|97.42	100.0|100.0	88.6|100.0	80.35|86.38	100.0|95.5	97.6|100.0	93.31|79.5	89.79|86.44	88.5|100.0	93.04
ONECUT1	100.0|100.0	100.0|100.0	100.0|100.0	44.73|100.0	100.0|100.0	100.0|100.0	44.73|100.0	100.0|100.0	44.73|100.0	44.73|100.0	88.95
EGR1	100.0|100.0	100.0|100.0	81.37|82.74	99.26|85.4	100.0|100.0	100.0|100.0	99.26|85.71	100.0|100.0	99.45|85.4	99.44|84.13	95.11
SLC4A3	96.58|98.78	96.58|98.06	96.58|98.94	98.01|98.09	100.0|100.0	100.0|100.0	100.0|100.0	100.0|100.0	100.0|100.0	100.0|100.0	99.08
PRX	100.0|10.22	100.0|8.78	95.92|9.25	100.0|10.49	100.0|100.0	100.0|100.0	99.59|100.0	100.0|100.0	100.0|100.0	100.0|100.0	81.71
PGAP4	100.0|100.0	100.0|100.0	100.0|100.0	100.0|100.0	100.0|100.0	100.0|100.0	100.0|100.0	100.0|100.0	100.0|100.0	100.0|100.0	100
GNA15	69.11|70.59	69.11|70.59	69.37|70.86	69.11|70.59	100.0|100.0	100.0|100.0	100.0|100.0	100.0|100.0	100.0|100.0	100.0|100.0	87.97
OSCAR	83.4|78.93	100.0|100.0	97.36|95.2	51.32|100.0	82.5|83.7	78.57|81.18	33.21|68.38	100.0|100.0	49.64|100.0	48.34|96.32	81.4
ARHGAP8	81.34|100.0	77.99|100.0	62.04|91.53	72.89|100.0	90.58|92.81	77.96|91.53	83.77|91.67	83.57|95.76	93.84|100.0	94.12|87.72	88.46
DEF6	95.25|99.5	100.0|100.0	100.0|100.0	100.0|92.8	99.34|95.09	99.34|95.24	99.34|88.11	100.0|100.0	100.0|92.66	100.0|92.66	97.47
D2HGDH	100.0|66.96	100.0|71.27	100.0|69.48	100.0|71.27	93.94|100.0	94.98|98.56	93.94|100.0	91.34|89.05	100.0|100.0	97.49|100.0	91.91
NBR1	100.0|97.39	100.0|97.51	100.0|95.55	100.0|97.41	100.0|100.0	100.0|100.0	100.0|100.0	100.0|100.0	100.0|100.0	100.0|100.0	99.39
MED18	100.0|100.0	100.0|100.0	100.0|100.0	100.0|100.0	100.0|100.0	100.0|100.0	100.0|100.0	100.0|100.0	100.0|100.0	100.0|100.0	100
LRRC46	100.0|99.69	100.0|100.0	100.0|100.0	100.0|100.0	99.69|100.0	100.0|100.0	99.69|100.0	100.0|100.0	100.0|100.0	100.0|100.0	99.95
RCN1	93.18|74.32	93.18|86.62	99.24|80.62	93.18|100.0	78.25|91.2	100.0|100.0	74.32|100.0	91.2|79.69	86.62|100.0	75.69|100.0	89.87
SYTL5	100.0|100.0	100.0|100.0	100.0|100.0	85.45|100.0	100.0|100.0	100.0|100.0	85.43|100.0	100.0|100.0	85.41|100.0	85.52|100.0	97.09
AP5S1	100.0|99.5	100.0|100.0	77.5|62.5	77.5|86.59	99.5|100.0	77.11|62.5	77.11|86.59	77.5|62.5	77.5|86.59	69.76|96.65	83.85
HELT	100.0|100.0	100.0|100.0	100.0|100.0	100.0|100.0	100.0|100.0	100.0|100.0	100.0|100.0	100.0|100.0	100.0|100.0	100.0|100.0	100
TULP4	100.0|100.0	100.0|100.0	100.0|100.0	40.18|80.99	100.0|100.0	100.0|100.0	40.18|80.99	100.0|100.0	40.18|80.99	40.01|80.6	84.21
RETREG1	48.31|82.87	49.76|61.31	48.31|62.5	49.92|86.83	100.0|73.61	100.0|75.42	95.86|97.2	100.0|100.0	70.63|99.72	72.29|97.2	78.59
SOCS2	65.89|99.49	65.89|99.49	54.52|81.09	67.89|99.51	100.0|100.0	75.76|74.63	100.0|97.06	75.76|74.63	100.0|97.06	74.63|73.53	83.84
TMEM115	100.0|100.0	100.0|100.0	99.15|99.43	100.0|100.0	100.0|100.0	99.15|99.43	100.0|100.0	99.15|99.43	100.0|100.0	99.43|99.15	99.72
SP5	100.0|100.0	96.98|87.73	100.0|100.0	63.57|100.0	97.23|87.73	100.0|100.0	63.73|100.0	87.73|96.98	58.18|100.0	63.57|100.0	90.17
GDNF	100.0|100.0	100.0|100.0	100.0|87.92	100.0|91.34	100.0|100.0	100.0|87.92	100.0|91.34	100.0|87.92	100.0|91.34	92.5|96.1	96.32
PLXDC2	87.86|93.01	87.86|93.01	89.64|94.72	46.43|81.0	100.0|100.0	100.0|100.0	48.96|80.69	100.0|100.0	48.96|80.69	48.87|80.69	83.12
CAV3	72.25|100.0	72.25|100.0	71.77|99.34	72.25|100.0	100.0|100.0	99.34|99.34	100.0|100.0	99.34|99.34	100.0|100.0	99.34|99.34	94.2
RHCG	72.32|100.0	75.78|100.0	75.45|91.97	75.78|100.0	100.0|95.43	99.77|87.75	100.0|95.42	99.57|91.97	100.0|100.0	91.97|99.78	92.65
NR6A1	97.09|99.08	96.19|85.46	100.0|93.13	84.53|100.0	95.19|82.87	99.08|87.47	86.04|100.0	88.84|90.1	71.71|95.74	76.16|100.0	91.43
VMAC	100.0|100.0	100.0|100.0	100.0|100.0	100.0|100.0	100.0|100.0	100.0|100.0	100.0|100.0	100.0|100.0	100.0|100.0	100.0|100.0	100
RCE1	59.08|82.07	17.51|19.75	59.08|82.07	98.91|100.0	24.32|19.75	100.0|100.0	100.0|81.84	19.75|24.32	19.75|19.9	100.0|81.84	60.5
FTSJ1	100.0|100.0	100.0|100.0	99.39|100.0	100.0|100.0	100.0|100.0	99.39|100.0	100.0|100.0	99.39|100.0	100.0|100.0	100.0|99.39	99.88
FBXL8	100.0|100.0	100.0|100.0	99.73|99.73	100.0|100.0	100.0|100.0	99.73|99.73	100.0|100.0	99.73|99.73	100.0|100.0	99.73|99.73	99.89
WDFY2	70.09|100.0	75.64|88.5	75.64|88.5	60.26|100.0	100.0|82.0	100.0|82.0	86.28|100.0	100.0|100.0	70.5|100.0	70.5|100.0	87.5
TBC1D17	94.84|99.08	87.46|91.37	94.1|98.91	84.96|88.34	100.0|100.0	99.23|99.84	89.68|89.26	92.45|93.02	89.68|89.26	90.39|89.42	93.06
RNF128	76.57|100.0	100.0|100.0	100.0|100.0	100.0|100.0	100.0|76.57	100.0|77.1	100.0|76.57	100.0|100.0	100.0|100.0	100.0|100.0	95.34
DMAP1	100.0|100.0	100.0|100.0	100.0|100.0	100.0|100.0	100.0|100.0	100.0|100.0	100.0|100.0	100.0|100.0	100.0|100.0	100.0|100.0	100
CDKN1B	100.0|100.0	100.0|100.0	98.99|99.49	81.31|95.27	100.0|100.0	98.99|100.0	81.41|95.86	99.0|100.0	80.5|95.27	81.73|95.27	95.15
PIH1D1	64.47|100.0	64.87|100.0	55.29|95.52	64.47|100.0	100.0|93.25	100.0|100.0	100.0|100.0	93.25|100.0	93.25|100.0	100.0|100.0	91.22
PRSS47	92.07|98.97	54.09|100.0	73.08|76.96	90.62|100.0	57.11|99.1	80.1|78.48	97.67|100.0	66.82|37.72	95.52|58.36	97.47|100.0	82.71
PEX5	94.53|100.0	94.53|100.0	94.68|100.0	94.53|100.0	100.0|100.0	100.0|100.0	100.0|100.0	100.0|100.0	100.0|100.0	100.0|100.0	98.91
PIGZ	80.12|100.0	84.29|82.86	80.84|100.0	80.84|100.0	100.0|78.75	98.38|97.68	98.56|97.68	79.89|100.0	79.46|100.0	99.46|99.29	91.91
KMT2C	96.42|100.0	100.0|100.0	100.0|99.29	96.11|99.85	100.0|95.89	100.0|95.23	99.98|99.74	100.0|100.0	95.64|100.0	94.9|100.0	98.65
GLDN	88.85|99.18	99.63|99.45	99.09|98.72	52.29|69.42	99.8|89.23	99.8|89.07	46.33|55.1	100.0|99.82	51.82|68.93	52.09|69.42	81.4
PROP1	91.59|76.38	100.0|100.0	100.0|100.0	100.0|100.0	76.38|91.59	67.9|82.51	78.97|98.62	100.0|100.0	100.0|100.0	100.0|100.0	93.2
MYLK3	95.41|100.0	95.76|100.0	96.35|100.0	91.06|100.0	100.0|100.0	100.0|100.0	97.98|100.0	100.0|100.0	97.79|100.0	98.62|100.0	98.65
CALCRL	93.07|96.41	100.0|99.78	100.0|99.78	100.0|99.78	96.41|92.87	96.41|92.87	96.41|92.87	99.78|99.78	100.0|100.0	99.78|99.78	97.79
TIMELESS	97.15|100.0	97.15|100.0	97.15|100.0	99.0|100.0	100.0|100.0	100.0|100.0	100.0|95.13	100.0|95.57	100.0|95.13	100.0|94.74	98.55
UTP3	100.0|100.0	100.0|100.0	100.0|100.0	100.0|100.0	100.0|100.0	100.0|100.0	100.0|100.0	100.0|100.0	100.0|100.0	100.0|100.0	100
VPS13A	97.76|100.0	97.73|99.18	97.73|99.34	56.03|99.23	100.0|100.0	100.0|100.0	57.7|99.23	100.0|100.0	56.83|99.17	56.89|99.12	90.8
MAN2C1	97.76|91.26	100.0|95.36	100.0|94.8	58.9|96.34	100.0|99.72	98.39|99.71	54.99|96.34	100.0|100.0	56.67|99.67	56.02|96.84	89.64
BAIAP3	84.57|35.52	84.57|35.4	84.57|35.74	84.57|41.27	100.0|99.66	99.57|100.0	86.17|100.0	99.14|100.0	85.79|100.0	86.61|100.0	82.16
LRP10	67.37|80.79	63.51|75.31	61.4|73.63	67.37|80.9	100.0|99.86	99.16|99.16	99.86|100.0	99.31|100.0	100.0|100.0	99.16|99.3	88.3
CLUH	100.0|100.0	100.0|100.0	97.11|96.75	98.74|88.44	100.0|100.0	100.0|100.0	98.67|88.44	100.0|100.0	98.67|88.44	98.15|88.24	97.08
ITGA10	94.4|95.29	94.23|95.28	94.4|95.29	94.23|95.36	100.0|100.0	100.0|100.0	100.0|100.0	100.0|100.0	100.0|100.0	100.0|100.0	97.92
NEU2	100.0|99.74	100.0|82.17	99.47|95.67	88.89|100.0	100.0|82.39	100.0|96.44	89.18|100.0	83.04|97.2	73.48|100.0	85.75|100.0	93.67
GALR2	100.0|100.0	100.0|100.0	90.67|94.34	96.37|67.27	100.0|100.0	95.87|100.0	96.12|67.27	94.32|98.38	96.12|67.27	95.69|64.2	91.19
CSRP1	96.02|100.0	96.02|100.0	96.02|100.0	96.52|81.86	100.0|100.0	100.0|100.0	100.0|81.43	100.0|100.0	100.0|81.43	100.0|81.43	95.54
UCN	100.0|100.0	100.0|100.0	100.0|100.0	100.0|100.0	100.0|100.0	100.0|100.0	100.0|100.0	100.0|100.0	100.0|100.0	100.0|100.0	100
MAK16	48.41|98.31	48.58|97.98	48.25|97.64	48.41|97.97	100.0|100.0	100.0|100.0	100.0|100.0	100.0|100.0	100.0|100.0	100.0|100.0	89.28
PDLIM5	100.0|100.0	100.0|100.0	100.0|100.0	87.54|83.28	100.0|100.0	100.0|100.0	82.98|76.29	100.0|100.0	87.68|83.28	89.9|83.89	93.74
PRELID3A	100.0|82.14	89.44|76.6	86.34|64.65	88.82|88.82	77.04|80.32	70.92|64.65	72.96|88.82	74.47|65.12	71.28|83.23	62.33|83.23	78.56
PRR35	100.0|100.0	100.0|100.0	90.11|84.59	71.64|86.1	100.0|100.0	100.0|100.0	66.67|86.1	100.0|99.3	70.93|85.87	78.98|100.0	91.01
UPK1B	84.42|100.0	80.84|95.4	84.42|100.0	81.82|96.55	95.77|95.4	100.0|100.0	96.92|96.55	95.4|95.77	100.0|100.0	96.92|96.55	94.64
NOTCH3	35.01|32.62	41.48|39.1	41.25|38.22	41.25|39.17	98.87|100.0	99.0|98.45	98.05|99.91	48.71|47.89	48.71|49.07	47.8|48.98	59.68
NAV1	84.89|100.0	100.0|99.5	100.0|100.0	67.84|100.0	100.0|84.21	100.0|87.32	80.13|100.0	99.45|100.0	67.51|100.0	69.97|100.0	92.04
LOC100478661	99.54|52.69	99.23|96.41	99.38|50.95	99.23|56.49	1.96|3.59	100.0|100.0	100.0|100.0	99.7|52.61	96.86|56.75	100.0|100.0	78.27
GALP	97.37|97.37	85.09|69.78	94.74|92.31	84.21|49.23	85.09|69.78	95.61|93.16	84.21|49.23	71.94|85.47	77.7|55.38	76.07|45.64	77.97
DAZL	93.97|99.66	93.33|99.66	93.02|98.32	93.02|98.32	99.66|100.0	99.33|98.99	99.33|98.99	99.66|98.66	99.66|98.66	100.0|100.0	98.11
FAM171A2	65.5|69.74	41.33|50.56	93.17|61.44	NA	69.94|80.36	95.48|59.12	15.72|43.24	9.93|5.35	18.06|43.24	14.6|64.86	50.09
GABRP	91.86|100.0	91.86|100.0	91.86|100.0	91.86|100.0	100.0|100.0	100.0|100.0	100.0|100.0	100.0|100.0	100.0|100.0	100.0|100.0	98.37
B4GALT3	76.22|94.7	76.22|94.7	76.22|94.94	76.22|94.7	100.0|100.0	100.0|100.0	100.0|100.0	100.0|100.0	100.0|100.0	100.0|100.0	94.2
C5H6orf201	61.96|100.0	29.97|90.84	46.35|81.06	48.87|71.59	56.47|100.0	89.66|91.63	88.36|75.65	85.5|49.34	100.0|48.34	81.94|68.63	73.31
KLHDC1	94.83|96.73	100.0|81.1	98.03|98.03	100.0|100.0	100.0|79.33	96.73|94.83	96.73|94.83	80.92|100.0	81.1|100.0	99.75|99.75	94.63
MATN3	96.29|99.57	95.05|90.22	99.59|100.0	67.01|95.59	92.32|84.74	62.69|61.12	66.95|92.35	89.04|94.59	63.6|95.59	64.03|90.59	85.05
ST6GAL1	100.0|100.0	100.0|100.0	100.0|100.0	100.0|100.0	99.75|100.0	100.0|100.0	99.75|100.0	100.0|100.0	100.0|100.0	100.0|100.0	99.98
PHACTR3	93.05|89.08	100.0|100.0	93.05|93.38	62.92|78.62	88.91|93.04	89.59|93.92	60.07|78.4	93.04|93.2	62.86|78.4	62.97|78.4	84.15
PTEN	NA	99.5|100.0	99.5|99.5	84.12|100.0	25.0|9.28	25.0|8.93	NA	100.0|100.0	86.08|98.53	84.12|100.0	76.22
RGL1	94.52|98.83	100.0|100.0	100.0|100.0	89.91|99.86	98.83|94.52	98.83|94.52	94.01|99.86	100.0|100.0	89.91|99.86	89.91|99.86	97.16
NYAP1	76.02|94.56	75.74|94.54	75.83|95.68	75.74|94.54	100.0|100.0	100.0|100.0	100.0|100.0	100.0|100.0	100.0|100.0	100.0|100.0	94.13
LRRC10	100.0|100.0	100.0|100.0	97.49|99.27	100.0|100.0	100.0|100.0	97.49|99.27	100.0|100.0	97.49|99.27	100.0|100.0	98.91|97.13	99.32
C8H1orf74	75.36|80.23	75.36|78.44	74.64|79.47	75.36|80.23	100.0|97.77	100.0|100.0	100.0|100.0	97.77|100.0	97.77|100.0	100.0|100.0	90.62
GCC1	100.0|100.0	100.0|100.0	100.0|100.0	100.0|100.0	100.0|100.0	100.0|100.0	100.0|100.0	100.0|100.0	100.0|100.0	100.0|100.0	100
KLRK1	82.49|93.72	100.0|100.0	100.0|100.0	71.43|100.0	67.02|71.11	100.0|84.05	60.73|75.32	94.44|73.28	85.56|100.0	58.19|87.66	85.25
KDM7A	100.0|99.77	100.0|94.81	100.0|93.3	96.81|100.0	99.77|94.81	99.89|93.4	96.59|100.0	94.81|93.3	91.78|100.0	90.32|100.0	96.97
CFAP69	100.0|100.0	100.0|100.0	100.0|100.0	100.0|100.0	100.0|100.0	100.0|100.0	100.0|100.0	100.0|100.0	100.0|100.0	100.0|100.0	100
TMEM41B	100.0|100.0	100.0|100.0	100.0|100.0	100.0|100.0	100.0|100.0	100.0|100.0	100.0|100.0	100.0|100.0	100.0|100.0	100.0|100.0	100
PDE11A	84.75|95.82	84.75|95.82	84.75|95.93	19.79|99.05	97.54|97.54	97.54|97.64	22.38|99.05	99.89|100.0	22.38|99.05	22.4|99.05	80.76
RBFOX1	63.39|93.15	100.0|100.0	57.51|79.86	27.98|87.1	93.4|63.45	91.37|86.33	41.12|87.1	57.41|79.86	27.93|87.1	38.85|87.1	72.5
TMEM252	60.21|67.25	89.53|100.0	89.01|92.9	100.0|100.0	100.0|100.0	66.08|61.75	100.0|89.53	99.41|92.35	100.0|89.53	92.35|88.48	88.92
CHTF18	89.07|100.0	82.66|90.42	82.93|94.64	88.89|100.0	100.0|100.0	100.0|100.0	99.9|100.0	100.0|100.0	99.31|100.0	100.0|100.0	96.39
GZF1	100.0|88.71	100.0|100.0	100.0|100.0	73.13|100.0	88.71|100.0	88.71|100.0	65.01|100.0	100.0|100.0	73.29|100.0	73.09|99.81	92.52
UNC80	100.0|99.79	100.0|99.65	100.0|99.58	17.01|99.82	100.0|100.0	100.0|100.0	16.64|100.0	100.0|100.0	16.27|99.82	16.57|99.82	83.25
FBXO40	99.4|88.84	100.0|93.66	99.7|93.38	100.0|93.66	94.89|99.44	95.03|99.58	94.89|99.44	99.86|99.86	100.0|100.0	99.86|99.86	97.57
ALKBH5	100.0|100.0	100.0|100.0	100.0|100.0	79.44|85.75	100.0|100.0	100.0|100.0	79.44|85.75	100.0|100.0	79.19|85.48	79.24|85.75	93
GJB2	100.0|100.0	100.0|100.0	100.0|100.0	100.0|100.0	100.0|100.0	100.0|100.0	100.0|100.0	100.0|100.0	100.0|100.0	100.0|100.0	100
B3GALT1	100.0|100.0	100.0|100.0	100.0|100.0	100.0|100.0	100.0|100.0	100.0|100.0	100.0|100.0	100.0|100.0	100.0|100.0	100.0|100.0	100
TRPA1	99.91|100.0	100.0|99.82	100.0|99.38	80.68|100.0	100.0|99.73	100.0|99.38	80.84|100.0	100.0|99.73	80.54|100.0	80.27|100.0	96.01
FOS	100.0|85.43	100.0|100.0	100.0|100.0	100.0|100.0	85.43|100.0	85.43|100.0	85.43|100.0	100.0|100.0	100.0|100.0	100.0|100.0	97.09
MS4A1	89.19|100.0	89.19|100.0	75.68|86.6	89.49|100.0	100.0|100.0	85.19|86.94	100.0|100.0	85.19|86.94	100.0|100.0	86.94|84.9	92.31
IL6R	93.59|100.0	75.85|76.02	100.0|100.0	94.66|100.0	74.77|69.81	100.0|95.87	100.0|98.65	82.66|83.91	70.66|74.49	96.96|100.0	89.4
ITIH3	100.0|90.51	92.35|89.45	92.35|89.65	92.35|89.45	100.0|100.0	100.0|100.0	100.0|100.0	100.0|100.0	100.0|100.0	100.0|100.0	96.81
HDHD3	100.0|100.0	100.0|100.0	98.8|98.8	97.21|97.21	100.0|100.0	98.41|98.41	99.6|99.6	98.41|98.41	99.2|99.2	98.41|98.41	99
FEZ1	88.38|87.0	88.15|98.72	88.15|98.72	90.89|83.65	86.77|98.72	86.77|98.72	87.0|81.34	100.0|100.0	98.72|81.13	98.72|81.13	91.13
SLC34A2	95.86|100.0	95.99|100.0	84.94|88.24	95.86|95.59	100.0|100.0	97.69|97.13	100.0|95.45	100.0|99.86	100.0|95.45	99.86|95.87	96.89
MINDY4	98.31|98.69	98.31|98.69	98.31|100.0	43.81|100.0	100.0|100.0	100.0|100.0	43.98|100.0	100.0|100.0	43.98|100.0	43.55|100.0	88.38
SH3D21	59.21|92.29	71.24|92.96	76.63|100.0	76.18|100.0	92.82|77.71	94.4|81.05	92.82|78.4	89.44|91.73	97.21|98.08	100.0|100.0	88.11
DOK5	98.96|85.33	62.5|90.0	99.31|93.46	79.17|76.0	53.29|89.0	85.03|92.81	68.26|76.0	100.0|65.36	71.5|47.67	74.51|76.0	79.21
BBS4	51.43|92.11	55.07|86.36	52.42|91.54	50.44|92.53	90.93|79.62	90.73|88.46	91.12|93.33	88.6|98.65	85.15|99.6	95.0|99.8	83.64
ILDR1	93.31|97.07	91.02|91.18	91.9|97.21	95.07|100.0	97.62|94.0	100.0|100.0	97.25|98.7	94.18|99.44	91.36|96.28	97.58|97.4	96.03
LRRC55	100.0|100.0	100.0|100.0	97.8|100.0	100.0|100.0	100.0|100.0	97.8|100.0	100.0|100.0	97.8|100.0	100.0|100.0	100.0|97.8	99.56
SUSD6	87.79|100.0	100.0|100.0	100.0|100.0	91.75|88.82	99.62|81.54	99.62|82.04	100.0|84.98	100.0|100.0	80.92|84.03	81.42|84.03	92.33
PCOLCE	100.0|100.0	100.0|100.0	100.0|100.0	100.0|100.0	100.0|100.0	100.0|100.0	100.0|100.0	100.0|100.0	100.0|100.0	100.0|99.8	99.99
KCNK13	100.0|100.0	100.0|100.0	100.0|100.0	71.78|100.0	100.0|100.0	100.0|100.0	71.71|100.0	100.0|100.0	71.71|100.0	72.59|100.0	94.39
TOMM70	88.83|88.83	88.83|88.83	88.67|88.38	88.83|88.83	88.83|88.83	88.67|88.38	88.83|88.83	88.67|88.38	88.83|88.83	88.38|88.67	88.71
LRRTM4	87.8|100.0	100.0|100.0	99.83|99.66	85.93|100.0	100.0|87.8	99.81|87.48	97.88|100.0	99.83|99.66	85.93|100.0	85.79|100.0	95.87
NRP2	100.0|100.0	100.0|100.0	100.0|100.0	100.0|100.0	100.0|100.0	100.0|100.0	100.0|100.0	100.0|100.0	100.0|100.0	100.0|100.0	100
GLIS2	92.66|100.0	83.73|100.0	83.57|100.0	83.57|100.0	90.36|100.0	90.19|100.0	90.19|100.0	100.0|100.0	100.0|100.0	100.0|100.0	95.71
SYNPO2	100.0|100.0	100.0|100.0	100.0|100.0	99.52|96.69	100.0|100.0	100.0|100.0	98.81|96.07	100.0|100.0	98.74|96.15	99.76|96.54	99.11
SLC16A3	91.88|100.0	91.88|100.0	93.07|100.0	91.88|100.0	100.0|100.0	100.0|100.0	100.0|100.0	100.0|100.0	100.0|100.0	100.0|100.0	98.44
SLC32A1	100.0|100.0	75.86|98.52	100.0|100.0	100.0|100.0	75.86|98.52	100.0|100.0	100.0|100.0	98.52|76.0	98.52|75.86	100.0|100.0	94.88
C5H6orf47	100.0|96.96	100.0|100.0	100.0|98.29	100.0|100.0	95.95|98.95	100.0|100.0	96.96|100.0	100.0|98.29	100.0|100.0	98.29|100.0	99.18
KCNV1	100.0|100.0	100.0|100.0	100.0|100.0	100.0|100.0	100.0|100.0	100.0|100.0	100.0|100.0	100.0|100.0	100.0|100.0	100.0|100.0	100
FLRT2	100.0|100.0	100.0|100.0	100.0|100.0	100.0|100.0	100.0|100.0	100.0|100.0	100.0|100.0	100.0|100.0	100.0|100.0	100.0|100.0	100
FIGN	100.0|100.0	100.0|100.0	100.0|100.0	100.0|100.0	100.0|100.0	100.0|100.0	98.16|100.0	100.0|100.0	98.16|100.0	98.16|100.0	99.72
CATSPERD	82.11|96.64	91.43|94.24	91.06|91.06	91.43|95.96	96.49|84.51	96.64|82.11	97.08|86.57	99.49|96.52	100.0|100.0	96.77|100.0	93.51
C3	99.11|93.05	98.6|92.84	98.85|93.08	50.77|86.32	100.0|100.0	100.0|100.0	54.8|99.24	100.0|100.0	54.96|99.24	55.02|99.35	88.76
ATXN7L1	91.33|90.09	91.33|90.28	92.49|94.39	84.46|95.8	100.0|100.0	97.39|100.0	83.11|95.56	97.39|100.0	83.28|95.56	86.3|95.92	93.23
HSPB6	100.0|91.21	100.0|100.0	96.23|94.44	100.0|100.0	91.21|100.0	90.66|100.0	92.86|98.26	98.77|99.38	100.0|100.0	100.0|98.84	97.59
AGXT2	88.35|92.64	88.54|93.19	93.72|93.72	88.35|93.18	99.61|100.0	100.0|100.0	99.42|100.0	100.0|100.0	100.0|100.0	100.0|100.0	96.54
CERS3	75.73|75.39	75.06|86.08	75.06|79.71	75.06|94.89	87.02|100.0	89.71|95.7	74.72|94.89	99.74|92.36	86.08|94.89	79.24|94.32	86.28
GTPBP3	100.0|100.0	100.0|100.0	100.0|100.0	100.0|100.0	100.0|100.0	100.0|100.0	100.0|100.0	100.0|100.0	100.0|100.0	100.0|100.0	100
OGFRL1	79.37|51.15	98.81|58.73	100.0|54.53	71.03|70.75	86.19|79.48	82.35|69.4	46.8|72.33	87.97|80.39	42.92|71.94	39.22|71.94	70.77
RIF1	97.49|100.0	98.51|100.0	97.88|100.0	97.45|100.0	100.0|100.0	100.0|100.0	100.0|100.0	100.0|100.0	100.0|100.0	100.0|100.0	99.57
ASCC3	100.0|100.0	100.0|100.0	100.0|100.0	48.37|98.25	100.0|100.0	100.0|100.0	48.39|98.25	100.0|100.0	48.37|98.25	48.45|98.25	89.33
TEAD2	99.56|82.2	100.0|100.0	100.0|100.0	100.0|87.23	82.2|99.33	82.2|100.0	82.2|86.65	100.0|100.0	100.0|87.23	100.0|87.23	93.8
C4H19orf67	78.39|100.0	100.0|97.77	99.42|96.91	100.0|97.77	100.0|75.98	100.0|76.4	100.0|75.98	100.0|100.0	100.0|100.0	100.0|100.0	94.93
PLCG1	93.63|91.16	93.63|93.63	92.75|89.48	93.63|86.28	97.36|100.0	98.99|98.08	99.22|93.91	98.96|95.47	100.0|92.15	97.31|92.96	94.93
STAT6	91.05|100.0	91.05|100.0	91.15|100.0	91.05|100.0	100.0|100.0	100.0|100.0	100.0|100.0	100.0|100.0	100.0|100.0	100.0|100.0	98.22
KDM4A	100.0|100.0	100.0|100.0	100.0|100.0	100.0|100.0	100.0|100.0	100.0|100.0	100.0|100.0	100.0|100.0	100.0|100.0	100.0|100.0	100
ARMC5	95.8|99.89	100.0|100.0	99.08|100.0	100.0|100.0	96.37|95.65	96.15|97.19	96.37|100.0	99.05|100.0	100.0|100.0	100.0|100.0	98.78
MAEL	92.96|100.0	93.6|100.0	92.96|100.0	100.0|90.02	100.0|100.0	100.0|100.0	100.0|83.3	100.0|100.0	100.0|83.88	100.0|83.3	96
CD70	100.0|100.0	100.0|94.42	100.0|100.0	100.0|100.0	100.0|94.42	98.01|100.0	100.0|100.0	91.63|100.0	94.42|100.0	100.0|98.01	98.55
TMPRSS6	100.0|100.0	99.75|100.0	100.0|98.89	99.88|87.35	100.0|100.0	100.0|99.38	100.0|87.9	100.0|98.77	100.0|87.24	99.14|87.68	97.3
FNBP4	100.0|100.0	100.0|100.0	100.0|96.01	99.61|99.51	100.0|100.0	100.0|96.56	99.61|100.0	100.0|96.01	99.51|99.71	95.36|100.0	99.09
MCM5	100.0|93.89	100.0|93.87	100.0|93.87	100.0|93.87	100.0|100.0	100.0|100.0	100.0|100.0	100.0|100.0	100.0|100.0	100.0|100.0	98.78
FCER1G	100.0|100.0	100.0|100.0	68.6|64.13	81.4|81.4	100.0|100.0	68.6|64.13	100.0|100.0	68.6|64.13	100.0|100.0	64.13|68.6	84.69
MRPS5	100.0|100.0	100.0|99.08	100.0|100.0	95.58|98.8	100.0|99.31	100.0|100.0	95.59|99.04	99.54|100.0	94.7|98.8	95.6|99.28	98.77
COPS2	93.51|97.52	93.51|96.0	93.51|96.0	93.51|96.0	100.0|100.0	100.0|100.0	100.0|100.0	100.0|100.0	100.0|100.0	100.0|100.0	97.98
SKA3	77.28|100.0	83.61|100.0	78.58|100.0	78.58|100.0	100.0|100.0	100.0|100.0	100.0|100.0	100.0|100.0	100.0|100.0	100.0|100.0	95.9
C8G	75.9|99.53	75.9|100.0	75.9|100.0	75.9|62.99	94.81|100.0	95.28|100.0	95.28|60.3	99.0|98.51	100.0|60.0	100.0|60.3	86.48
SCRG1	98.98|78.23	100.0|100.0	100.0|100.0	100.0|100.0	78.23|98.98	78.23|98.98	78.23|98.98	100.0|100.0	100.0|100.0	100.0|100.0	95.44
LZTS3	100.0|100.0	100.0|95.73	100.0|96.14	100.0|95.73	100.0|95.73	100.0|96.14	100.0|95.73	100.0|100.0	100.0|100.0	100.0|100.0	98.76
SOWAHA	99.3|98.95	98.95|76.01	97.72|100.0	97.37|100.0	97.03|74.8	97.38|100.0	99.65|100.0	74.93|100.0	74.53|100.0	100.0|99.46	94.3
FAM3B	53.71|100.0	67.95|91.97	67.06|91.87	70.92|97.55	100.0|72.69	98.34|72.36	100.0|73.88	98.8|100.0	91.97|93.47	91.87|92.24	86.33
HOXC9	88.51|29.62	88.51|29.62	88.51|29.62	88.51|29.62	100.0|100.0	100.0|100.0	100.0|100.0	100.0|100.0	100.0|100.0	100.0|100.0	83.63
GPBP1L1	82.45|100.0	100.0|100.0	100.0|100.0	100.0|100.0	100.0|82.28	100.0|83.09	100.0|82.35	100.0|100.0	100.0|100.0	100.0|100.0	96.51
APMAP	100.0|100.0	100.0|100.0	100.0|100.0	100.0|100.0	100.0|100.0	100.0|100.0	100.0|100.0	100.0|100.0	100.0|100.0	100.0|100.0	100
NUDCD3	92.2|69.55	92.2|56.46	99.08|59.5	88.07|100.0	70.59|57.3	70.59|56.2	66.44|100.0	100.0|100.0	53.93|100.0	52.89|100.0	79.25
PTGES2	100.0|100.0	100.0|100.0	100.0|97.4	100.0|100.0	100.0|100.0	100.0|97.4	100.0|100.0	100.0|97.4	100.0|100.0	97.66|100.0	99.49
LARP1	70.91|83.57	80.82|96.54	89.34|89.09	90.27|100.0	73.54|74.53	99.78|84.42	83.79|78.76	96.42|80.5	96.54|89.53	89.27|99.17	87.34
VPS37D	83.67|100.0	82.87|81.57	69.32|66.67	83.67|76.64	98.1|80.78	100.0|84.29	99.05|75.91	51.37|50.19	85.88|79.93	50.19|47.81	77.4
PSENEN	100.0|100.0	100.0|100.0	100.0|100.0	100.0|100.0	100.0|100.0	100.0|100.0	100.0|100.0	100.0|100.0	100.0|100.0	100.0|100.0	100
PCBD1	100.0|99.04	100.0|99.04	100.0|99.04	100.0|83.06	100.0|100.0	100.0|100.0	99.04|83.06	100.0|100.0	99.04|83.06	99.04|83.06	96.32
ACO2	95.71|100.0	95.71|97.75	95.59|100.0	91.54|100.0	100.0|97.75	99.87|100.0	95.65|100.0	97.62|100.0	93.49|100.0	95.77|100.0	97.82
EFHB	81.95|98.77	99.89|100.0	100.0|100.0	100.0|100.0	98.36|82.45	98.5|84.41	98.36|84.49	100.0|100.0	100.0|100.0	100.0|100.0	96.36
GUCA2A	100.0|100.0	100.0|100.0	100.0|100.0	100.0|100.0	100.0|100.0	100.0|100.0	100.0|100.0	100.0|100.0	100.0|100.0	100.0|100.0	100
CLEC5A	70.19|79.35	70.19|79.35	73.08|80.0	60.58|76.83	99.46|99.46	100.0|100.0	100.0|100.0	100.0|99.47	99.46|100.0	100.0|100.0	89.37
WDR41	77.31|96.51	77.31|96.51	39.09|47.97	77.31|96.72	100.0|100.0	52.29|51.39	100.0|100.0	52.29|51.39	100.0|100.0	51.39|52.4	75.99
TG	100.0|100.0	100.0|100.0	100.0|100.0	12.74|100.0	100.0|100.0	100.0|100.0	12.81|100.0	100.0|100.0	12.78|100.0	12.91|100.0	82.56
NRCAM	100.0|100.0	100.0|100.0	100.0|100.0	93.25|100.0	100.0|100.0	100.0|100.0	93.25|100.0	100.0|100.0	93.27|100.0	93.71|100.0	98.67
NSG2	100.0|100.0	100.0|100.0	100.0|100.0	61.4|96.33	100.0|100.0	100.0|100.0	61.4|96.33	100.0|100.0	61.4|96.33	61.4|96.33	91.55
DUSP5	76.7|99.32	100.0|100.0	100.0|100.0	67.54|93.48	99.32|76.7	100.0|76.82	87.46|93.48	100.0|100.0	67.54|93.48	67.71|94.2	89.69
MZF1	64.22|66.27	64.22|60.48	51.48|49.14	49.94|78.7	66.27|60.48	53.25|49.26	51.26|78.3	48.73|49.39	46.79|78.3	47.42|78.3	59.61
MIPEP	98.34|74.91	93.05|79.9	98.34|91.56	38.07|76.83	78.02|87.94	81.24|99.3	39.7|100.0	87.29|94.66	42.67|100.0	43.18|93.6	79.93
HSPA9	93.81|96.02	93.81|96.02	93.81|96.02	93.81|100.0	100.0|100.0	100.0|100.0	96.47|100.0	100.0|100.0	96.47|100.0	96.47|100.0	97.64
FAM217A	99.67|100.0	100.0|100.0	100.0|100.0	100.0|100.0	100.0|93.27	100.0|93.81	99.16|93.66	100.0|100.0	99.53|100.0	100.0|100.0	98.96
TMIGD1	91.9|100.0	91.9|100.0	92.25|100.0	91.9|100.0	100.0|100.0	100.0|100.0	100.0|100.0	100.0|100.0	100.0|100.0	100.0|100.0	98.4
HTR1A	91.01|98.34	91.01|98.34	91.01|98.57	90.79|98.1	100.0|100.0	99.76|100.0	100.0|100.0	99.76|100.0	100.0|100.0	100.0|99.76	97.82
RSPH14	100.0|100.0	100.0|100.0	100.0|91.18	41.47|73.06	100.0|100.0	100.0|91.18	41.47|73.06	100.0|91.44	41.35|73.06	37.7|73.06	81.4
BPIFB2	99.57|100.0	99.78|99.14	95.0|94.59	99.13|99.56	100.0|98.92	100.0|99.78	99.56|99.56	94.6|94.81	98.49|99.56	99.57|100.0	98.58
SH3RF3	78.35|100.0	79.69|95.45	100.0|100.0	58.82|93.94	98.99|91.98	100.0|79.73	75.11|93.05	95.45|81.32	69.92|93.23	60.14|94.12	86.96
TMCO5A	68.27|70.07	67.95|69.97	67.31|69.31	62.18|72.39	100.0|100.0	100.0|100.0	89.47|100.0	100.0|100.0	90.1|100.0	90.1|100.0	85.86
MYBPC3	98.38|100.0	100.0|98.03	98.61|99.77	97.53|100.0	99.53|95.91	100.0|99.53	100.0|100.0	95.76|98.9	95.76|100.0	99.37|100.0	98.85
CPT2	93.17|90.96	100.0|100.0	99.24|99.39	100.0|91.06	90.96|93.17	90.07|92.4	92.89|84.96	99.24|99.39	100.0|91.06	100.0|90.24	94.91
ABAT	100.0|96.91	100.0|100.0	100.0|100.0	96.2|86.67	97.49|100.0	96.91|100.0	93.24|87.03	100.0|100.0	98.98|87.57	98.0|88.29	96.36
CTNNBL1	100.0|100.0	100.0|100.0	100.0|100.0	58.26|80.2	100.0|100.0	100.0|100.0	58.26|80.2	100.0|100.0	58.26|80.2	58.26|80.2	87.69
HGSNAT	86.54|100.0	86.54|100.0	92.6|95.43	86.54|100.0	100.0|100.0	100.0|89.18	100.0|100.0	100.0|89.18	100.0|100.0	89.18|100.0	95.76
SARS1	100.0|100.0	100.0|100.0	100.0|100.0	100.0|91.16	100.0|100.0	100.0|100.0	100.0|91.16	100.0|100.0	100.0|91.16	100.0|91.5	98.25
SGTB	100.0|100.0	100.0|100.0	100.0|100.0	100.0|100.0	100.0|100.0	100.0|100.0	100.0|100.0	100.0|100.0	100.0|100.0	100.0|100.0	100
IGF2R	98.4|100.0	97.96|96.0	99.6|100.0	98.04|98.99	100.0|96.43	100.0|99.07	100.0|99.35	96.11|98.63	96.0|98.91	98.71|99.11	98.57
LSM14A	94.42|91.36	94.42|91.36	94.42|91.56	92.86|86.85	100.0|100.0	100.0|100.0	98.49|95.2	100.0|100.0	98.49|95.2	98.7|95.2	95.93
SPINK5	100.0|100.0	100.0|100.0	100.0|100.0	11.48|80.26	100.0|100.0	100.0|100.0	11.48|80.26	100.0|100.0	11.49|80.26	12.0|80.26	78.37
ANP32E	58.71|58.49	58.33|58.56	58.71|59.62	58.71|64.85	58.11|58.56	59.25|60.38	58.87|65.27	58.56|59.23	58.56|64.44	84.23|91.63	62.65
FNDC11	74.0|100.0	74.0|100.0	74.0|100.0	70.67|97.55	100.0|100.0	100.0|100.0	95.5|97.55	100.0|100.0	95.5|97.55	95.48|97.24	93.45
SLBP	66.67|96.41	99.65|100.0	100.0|100.0	79.43|92.95	94.36|67.15	94.36|66.91	100.0|80.91	100.0|99.64	81.75|92.95	81.45|92.95	89.38
CCDC86	100.0|29.05	100.0|28.89	100.0|24.41	100.0|30.14	100.0|100.0	47.49|39.91	100.0|100.0	49.44|41.78	100.0|100.0	100.0|100.0	74.56
HMGCS1	99.17|91.73	99.17|91.73	99.17|91.73	99.17|91.73	100.0|100.0	100.0|100.0	100.0|100.0	100.0|100.0	100.0|100.0	100.0|100.0	98.18
SH3PXD2A	91.28|93.9	92.59|93.9	92.59|94.48	57.19|100.0	100.0|100.0	100.0|100.0	58.83|100.0	100.0|100.0	58.0|100.0	58.36|100.0	89.56
IL27	66.38|64.98	66.81|65.4	66.81|66.24	66.81|64.05	100.0|100.0	100.0|100.0	100.0|100.0	99.16|100.0	100.0|100.0	100.0|99.59	86.31
KCNJ8	100.0|100.0	100.0|100.0	100.0|100.0	100.0|100.0	100.0|100.0	100.0|100.0	100.0|100.0	100.0|100.0	100.0|100.0	100.0|100.0	100
FPGS	100.0|100.0	100.0|100.0	100.0|100.0	100.0|100.0	100.0|100.0	100.0|100.0	100.0|100.0	100.0|100.0	100.0|100.0	100.0|100.0	100
REC114	24.33|90.91	64.72|100.0	65.69|100.0	41.36|100.0	89.09|37.4	89.09|37.84	75.45|49.7	100.0|100.0	64.89|100.0	64.48|100.0	74.75
TRANK1	78.51|98.96	78.91|98.96	77.37|96.77	43.62|98.79	100.0|100.0	98.59|97.83	54.94|98.73	98.6|98.33	55.17|99.64	52.98|95.95	86.13
CA7	82.3|95.08	76.39|80.9	82.3|95.08	100.0|82.09	100.0|100.0	100.0|100.0	100.0|70.59	100.0|100.0	100.0|77.27	100.0|70.59	90.63
LOC100478285	73.11|74.52	72.17|92.73	74.06|74.41	72.17|72.17	81.25|100.0	100.0|100.0	100.0|98.11	100.0|81.04	100.0|77.83	100.0|99.53	87.16
PLXDC1	91.85|92.4	100.0|93.14	93.44|92.7	88.87|90.49	100.0|100.0	100.0|100.0	97.0|98.18	100.0|100.0	97.29|100.0	97.04|99.6	96.6
MARCHF4	100.0|100.0	100.0|100.0	94.7|96.09	57.59|79.93	100.0|100.0	95.16|96.09	57.87|79.93	100.0|100.0	58.29|79.93	58.44|79.93	86.7
CD72	99.73|99.73	99.73|100.0	100.0|100.0	100.0|100.0	100.0|100.0	98.91|100.0	100.0|100.0	100.0|100.0	100.0|100.0	100.0|100.0	99.91
FAM227A	95.99|95.83	98.08|96.24	100.0|94.4	28.4|72.77	98.96|97.26	100.0|93.44	28.35|72.77	100.0|93.76	27.86|72.77	26.24|73.21	78.32
SZRD1	99.34|98.69	100.0|100.0	100.0|100.0	92.11|80.0	100.0|100.0	98.69|99.34	90.2|78.86	100.0|100.0	93.12|85.14	92.11|80.0	94.38
PI16	42.36|96.52	100.0|100.0	100.0|94.98	96.72|96.1	96.02|42.7	99.0|39.96	87.56|38.18	100.0|95.38	97.79|95.88	95.58|100.0	85.74
CHRNA1	100.0|95.24	100.0|100.0	100.0|100.0	100.0|100.0	90.67|100.0	90.67|100.0	90.67|100.0	100.0|100.0	100.0|100.0	100.0|100.0	98.36
SPARCL1	100.0|100.0	100.0|100.0	100.0|100.0	100.0|100.0	100.0|100.0	100.0|100.0	100.0|100.0	100.0|100.0	100.0|100.0	100.0|100.0	100
CERS5	51.13|81.44	71.04|97.77	57.12|85.27	66.18|94.9	84.79|73.27	84.79|79.47	84.79|76.33	87.31|94.69	93.99|97.91	94.69|90.95	82.39
MAST4	100.0|61.13	100.0|58.47	100.0|59.17	99.61|64.95	100.0|95.7	100.0|97.94	93.33|99.62	100.0|100.0	89.28|99.62	91.41|100.0	90.51
ASH2L	89.43|90.29	89.91|90.33	89.43|91.01	88.96|84.56	89.81|89.38	89.33|90.05	89.81|84.56	91.76|92.94	89.86|85.01	90.21|84.26	89.05
POU3F4	100.0|100.0	100.0|100.0	100.0|100.0	60.39|100.0	100.0|100.0	100.0|100.0	60.39|100.0	100.0|100.0	60.39|100.0	60.39|100.0	92.08
WFIKKN2	100.0|100.0	100.0|100.0	99.83|100.0	100.0|100.0	100.0|100.0	99.83|100.0	100.0|100.0	99.83|100.0	100.0|100.0	100.0|100.0	99.97
GH1	100.0|100.0	100.0|96.43	100.0|100.0	99.54|50.12	100.0|96.43	100.0|100.0	99.54|50.12	96.43|100.0	94.64|49.42	97.69|49.18	88.98
GDPGP1	92.21|94.59	96.73|98.72	96.73|99.74	96.73|100.0	94.59|94.1	95.88|96.37	94.33|95.31	98.72|99.74	98.72|100.0	99.74|100.0	97.15
SLCO3A1	92.92|100.0	91.62|99.69	96.24|93.8	68.21|100.0	98.6|99.69	95.96|86.9	73.41|100.0	95.6|85.63	74.21|100.0	62.82|94.49	90.49
ATPSCKMT	92.61|100.0	100.0|100.0	88.7|82.59	93.91|86.4	100.0|97.84	95.77|82.59	100.0|85.2	96.97|90.69	97.84|90.4	83.81|82.8	92.41
PAQR4	100.0|100.0	100.0|100.0	100.0|100.0	79.85|96.46	100.0|100.0	100.0|100.0	79.85|96.46	100.0|100.0	79.85|96.46	79.85|96.46	95.26
TNFAIP2	56.71|100.0	4.95|7.17	61.67|66.81	59.58|99.35	100.0|82.08	100.0|63.7	100.0|94.57	90.94|68.08	86.42|99.57	66.95|100.0	75.43
LDLRAD3	100.0|89.49	100.0|97.07	100.0|95.65	59.63|70.65	89.49|97.36	92.72|99.71	52.83|71.01	98.24|97.1	57.18|70.65	56.52|70.65	83.3
CSTF1	100.0|100.0	100.0|100.0	100.0|100.0	100.0|100.0	100.0|100.0	100.0|100.0	100.0|100.0	100.0|100.0	100.0|100.0	100.0|100.0	100
CEP57	68.59|94.82	68.44|94.81	68.59|95.2	68.44|94.81	100.0|100.0	100.0|100.0	100.0|100.0	100.0|100.0	100.0|100.0	100.0|100.0	92.69
KLHL35	100.0|100.0	62.69|100.0	100.0|100.0	63.04|84.69	62.16|100.0	100.0|100.0	62.5|84.69	100.0|63.24	100.0|84.22	66.9|89.1	86.16
LIPT1	97.9|100.0	97.9|100.0	97.9|100.0	97.9|100.0	100.0|100.0	100.0|100.0	100.0|100.0	100.0|100.0	100.0|100.0	100.0|100.0	99.58
TFAP2D	100.0|100.0	100.0|100.0	100.0|100.0	100.0|100.0	100.0|100.0	100.0|100.0	100.0|100.0	100.0|100.0	100.0|100.0	100.0|100.0	100
TMEM248	85.67|98.73	85.4|98.73	85.4|98.73	89.26|94.19	99.68|100.0	99.68|100.0	98.73|90.41	100.0|100.0	98.73|90.12	98.73|90.12	95.12
SLC38A5	100.0|100.0	100.0|100.0	100.0|98.96	100.0|98.95	100.0|100.0	100.0|98.96	100.0|98.95	100.0|98.96	100.0|98.95	99.16|99.58	99.62
FAM122B	67.36|90.8	81.6|100.0	81.6|100.0	67.36|94.19	90.8|82.55	90.8|88.67	100.0|100.0	100.0|100.0	82.55|94.19	88.67|94.19	89.77
SFRP4	88.76|89.02	99.71|77.93	82.42|78.36	86.74|86.99	88.73|69.14	82.37|78.08	86.71|86.71	64.19|78.08	67.57|86.71	78.08|82.37	81.93
DECR1	100.0|100.0	100.0|100.0	88.64|93.13	80.97|100.0	100.0|100.0	100.0|100.0	86.63|100.0	100.0|100.0	86.63|100.0	85.07|100.0	96.05
GPR37L1	100.0|100.0	100.0|98.96	100.0|100.0	100.0|99.17	100.0|100.0	100.0|100.0	100.0|100.0	99.58|99.38	100.0|100.0	100.0|100.0	99.85
WDR13	100.0|100.0	100.0|93.5	100.0|100.0	100.0|100.0	100.0|93.5	100.0|100.0	100.0|100.0	93.5|100.0	93.5|100.0	100.0|100.0	98.7
CDK5RAP3	100.0|100.0	99.8|98.82	100.0|100.0	100.0|91.2	99.8|98.82	100.0|100.0	100.0|91.2	99.21|100.0	99.61|91.02	100.0|91.56	98.05
TBC1D8	96.84|96.59	88.33|94.82	96.93|97.44	99.12|95.93	87.05|93.69	100.0|100.0	97.81|94.91	93.69|87.74	96.05|86.59	98.59|94.91	94.85
INSM2	100.0|100.0	100.0|100.0	100.0|100.0	100.0|100.0	100.0|100.0	100.0|100.0	100.0|100.0	100.0|100.0	100.0|100.0	100.0|100.0	100
C1H3orf52	70.9|79.0	70.08|78.44	70.08|78.44	75.82|80.09	96.35|96.79	98.17|98.62	95.43|90.48	100.0|100.0	99.54|93.94	98.62|93.07	88.19
GREM1	80.0|100.0	80.0|100.0	80.0|100.0	81.3|44.84	100.0|100.0	100.0|100.0	100.0|44.12	100.0|100.0	100.0|44.12	100.0|44.12	84.93
SCARA5	87.79|100.0	88.87|100.0	87.61|99.39	74.69|94.76	100.0|98.99	99.39|98.98	85.07|94.76	99.39|100.0	84.04|94.76	84.11|94.08	93.33
LOC100473238	100.0|100.0	100.0|100.0	100.0|99.68	100.0|100.0	99.68|99.68	100.0|99.68	99.84|99.84	100.0|99.68	100.0|100.0	99.68|100.0	99.89
RNF41	100.0|77.6	100.0|77.6	100.0|77.6	100.0|77.6	100.0|100.0	100.0|100.0	100.0|100.0	100.0|100.0	100.0|100.0	100.0|100.0	95.52
RPAIN	63.01|95.34	81.85|96.37	71.92|95.89	38.7|93.39	100.0|77.82	100.0|88.13	58.55|93.39	100.0|100.0	45.56|93.39	51.6|93.39	81.92
PARP11	83.0|98.22	83.0|98.22	82.5|99.7	82.5|99.7	100.0|100.0	97.93|100.0	97.93|100.0	97.93|100.0	97.93|100.0	100.0|100.0	95.93
B4GALNT1	76.25|100.0	76.25|100.0	76.25|100.0	76.39|95.7	100.0|100.0	100.0|100.0	100.0|95.52	100.0|100.0	100.0|95.52	100.0|95.52	94.37
NSUN3	100.0|99.11	100.0|99.11	99.7|95.69	73.05|100.0	100.0|100.0	100.0|96.84	72.4|100.0	100.0|96.84	72.4|100.0	70.11|100.0	93.76
ZBTB49	46.2|83.37	95.27|100.0	95.52|100.0	43.09|50.96	84.94|49.54	93.71|55.16	77.75|50.96	100.0|100.0	45.35|50.96	45.37|50.52	70.93
FLRT1	96.98|100.0	96.98|100.0	96.98|100.0	93.24|99.54	100.0|100.0	100.0|100.0	96.14|99.54	100.0|100.0	96.14|99.54	96.29|99.69	98.55
HEATR4	100.0|100.0	100.0|94.74	93.23|98.12	100.0|95.0	100.0|94.55	92.85|97.91	100.0|94.91	87.79|97.91	97.37|97.74	97.17|87.46	96.34
TMEM65	100.0|100.0	38.87|70.91	100.0|100.0	86.05|100.0	48.52|69.7	100.0|100.0	96.2|91.94	69.09|48.72	66.06|43.95	97.44|91.94	80.97
KLK6	100.0|100.0	100.0|84.54	100.0|95.65	85.65|99.51	100.0|84.54	98.37|95.65	82.93|100.0	85.22|98.02	69.76|99.51	79.45|98.53	92.87
PCIF1	100.0|100.0	100.0|96.17	100.0|100.0	100.0|100.0	95.58|91.79	95.58|95.04	100.0|100.0	96.72|100.0	96.17|100.0	100.0|100.0	98.35
FAM160B2	92.9|100.0	100.0|98.66	99.86|98.25	93.58|100.0	100.0|91.69	100.0|92.2	100.0|100.0	98.26|98.52	91.82|100.0	92.88|100.0	97.43
CTDSP2	60.63|85.24	60.63|85.24	60.63|85.56	55.12|82.03	100.0|100.0	100.0|100.0	92.25|97.66	100.0|100.0	92.25|97.66	92.59|97.66	87.26
ZDHHC18	98.02|95.02	100.0|74.41	100.0|66.58	98.02|88.57	95.02|72.94	95.02|65.26	95.02|88.57	96.18|86.05	72.94|88.57	65.26|88.57	86.5
SYT17	71.89|85.23	71.89|85.23	72.06|86.17	55.52|94.83	100.0|100.0	98.95|99.79	66.03|95.14	98.95|99.79	66.03|95.14	66.38|94.83	85.19
DIS3	100.0|100.0	100.0|100.0	100.0|100.0	100.0|92.56	100.0|100.0	100.0|100.0	100.0|92.56	100.0|100.0	100.0|92.56	100.0|92.56	98.51
KIAA1614	97.89|100.0	98.3|100.0	99.03|100.0	47.93|92.2	100.0|100.0	100.0|100.0	49.12|91.42	100.0|100.0	48.63|91.42	48.75|91.42	87.81
RBM27	96.14|96.14	96.14|94.27	96.23|96.32	96.14|96.23	96.14|94.27	96.32|96.42	96.14|96.23	94.36|96.32	94.27|96.23	96.23|96.23	95.84
NEDD1	89.65|100.0	89.92|98.95	89.92|100.0	93.19|90.24	100.0|98.65	100.0|100.0	100.0|86.81	98.95|100.0	98.95|87.07	100.0|87.07	95.47
LGI1	100.0|100.0	100.0|86.9	100.0|100.0	100.0|79.91	100.0|86.9	100.0|100.0	100.0|79.91	86.9|100.0	100.0|91.97	100.0|79.91	94.62
OCLN	86.58|92.9	86.4|92.88	88.37|94.82	87.3|93.49	100.0|100.0	100.0|100.0	100.0|100.0	100.0|100.0	100.0|100.0	100.0|99.81	96.13
SLC35A1	87.11|97.07	87.37|90.71	88.42|100.0	87.37|90.71	98.53|91.8	98.53|100.0	98.53|91.8	92.08|100.0	100.0|100.0	100.0|92.08	94.61
SUZ12	90.8|90.68	90.66|90.66	90.66|90.42	90.66|93.18	90.68|90.8	90.68|90.55	90.68|93.32	90.66|90.42	90.66|93.18	90.42|93.18	91.15
KCNJ5	89.98|89.98	89.98|89.98	89.98|89.98	89.98|80.73	100.0|100.0	100.0|100.0	100.0|89.72	100.0|100.0	100.0|89.72	100.0|89.72	93.99
LOC100471780	99.4|99.6	100.0|100.0	97.8|99.39	99.0|99.4	99.6|99.4	98.2|99.59	100.0|100.0	97.8|99.39	99.0|99.4	99.39|98.2	99.23
CDX1	100.0|100.0	100.0|100.0	100.0|100.0	92.08|99.19	100.0|100.0	100.0|100.0	92.45|99.59	100.0|100.0	92.45|99.59	58.96|64.23	94.93
JHY	100.0|100.0	100.0|100.0	100.0|100.0	100.0|100.0	100.0|100.0	100.0|100.0	100.0|100.0	100.0|100.0	100.0|100.0	100.0|100.0	100
ARID5B	100.0|100.0	100.0|100.0	100.0|100.0	79.93|100.0	100.0|100.0	100.0|100.0	79.65|100.0	100.0|100.0	79.63|99.89	79.71|100.0	95.94
CAMTA1	92.17|91.13	87.93|90.8	92.65|92.15	30.13|85.28	94.68|98.89	99.05|99.64	32.62|93.4	99.07|95.42	34.07|93.4	32.82|93.4	81.44
FAM167A	86.42|100.0	86.42|100.0	88.89|100.0	86.42|100.0	100.0|100.0	100.0|100.0	100.0|100.0	100.0|100.0	100.0|100.0	100.0|100.0	97.41
ZMAT2	100.0|100.0	96.98|93.69	100.0|100.0	96.98|93.69	96.98|93.69	100.0|100.0	96.98|93.69	93.69|96.98	100.0|100.0	96.98|93.69	97.2
TBC1D13	88.75|100.0	100.0|100.0	100.0|100.0	100.0|88.5	100.0|88.75	100.0|88.75	100.0|78.54	100.0|100.0	100.0|88.5	100.0|88.5	95.51
TBC1D23	93.55|97.43	93.55|97.43	93.42|97.42	93.55|87.77	100.0|100.0	100.0|100.0	100.0|90.09	100.0|100.0	100.0|90.09	100.0|90.09	96.22
IBA57	68.21|65.92	47.11|100.0	68.79|66.48	37.57|73.45	44.97|98.77	100.0|100.0	35.47|71.75	100.0|45.81	79.75|73.45	36.59|74.01	69.41
MEI1	100.0|100.0	100.0|100.0	100.0|96.07	100.0|99.84	100.0|100.0	100.0|96.0	100.0|99.76	99.84|95.92	100.0|99.76	96.0|99.69	99.14
DCDC2C	93.94|97.99	97.8|93.92	74.66|43.57	80.99|51.76	97.99|90.21	77.87|43.57	84.48|51.76	79.63|48.39	77.78|51.76	40.19|44.01	71.11
F2	100.0|100.0	100.0|100.0	100.0|100.0	100.0|100.0	100.0|100.0	100.0|100.0	100.0|100.0	100.0|100.0	100.0|100.0	100.0|100.0	100
LURAP1L	100.0|100.0	100.0|100.0	100.0|100.0	49.14|100.0	100.0|100.0	100.0|100.0	51.12|100.0	100.0|100.0	50.67|100.0	51.58|100.0	90.13
TMEM170A	100.0|100.0	100.0|100.0	100.0|100.0	100.0|100.0	100.0|100.0	100.0|100.0	100.0|100.0	100.0|100.0	100.0|100.0	100.0|100.0	100
C2H1orf50	69.77|94.74	90.7|100.0	70.93|91.96	93.41|100.0	89.47|88.54	100.0|95.98	88.42|84.0	97.92|94.47	100.0|96.0	98.99|98.5	92.19
SLITRK2	100.0|100.0	100.0|100.0	100.0|100.0	100.0|100.0	100.0|100.0	100.0|100.0	100.0|100.0	100.0|100.0	100.0|100.0	100.0|100.0	100
ZBTB46	61.11|68.98	61.11|67.38	61.11|67.83	61.11|69.22	100.0|97.68	100.0|100.0	100.0|100.0	99.34|100.0	97.68|100.0	100.0|100.0	85.63
GRB14	90.67|37.78	90.67|43.78	90.67|37.92	98.67|49.01	86.3|100.0	100.0|100.0	80.56|96.03	99.79|86.43	93.35|96.03	80.86|96.03	82.73
GPR171	100.0|100.0	100.0|100.0	99.37|99.37	100.0|100.0	100.0|100.0	100.0|99.69	100.0|100.0	99.37|99.37	100.0|100.0	99.37|99.37	99.8
PLEKHA7	96.62|100.0	99.23|100.0	100.0|100.0	96.93|97.6	95.28|94.45	94.24|93.13	100.0|99.77	98.49|98.18	100.0|97.6	98.42|96.29	97.81
MFAP2	74.38|81.62	73.4|81.42	73.89|81.08	74.38|82.07	100.0|100.0	100.0|100.0	99.46|100.0	100.0|100.0	100.0|100.0	100.0|100.0	91.09
UBXN1	91.56|95.27	91.56|95.27	91.88|95.29	91.56|95.27	100.0|100.0	100.0|100.0	100.0|100.0	100.0|100.0	100.0|100.0	100.0|100.0	97.38
MFSD6	100.0|100.0	100.0|100.0	100.0|100.0	100.0|100.0	100.0|100.0	100.0|100.0	100.0|100.0	100.0|100.0	100.0|100.0	100.0|100.0	100
SPTY2D1	100.0|100.0	100.0|100.0	98.42|100.0	98.57|100.0	100.0|100.0	98.23|97.8	98.53|100.0	98.44|100.0	98.72|100.0	94.57|98.32	99.08
HTR7	95.41|97.54	99.78|97.65	95.2|92.77	51.75|95.56	100.0|100.0	97.32|92.77	55.36|100.0	97.44|97.02	52.99|100.0	50.0|94.76	88.17
SLC39A13	82.04|86.2	100.0|95.77	100.0|100.0	100.0|95.64	96.06|84.83	90.99|86.36	94.65|86.15	95.52|100.0	100.0|100.0	100.0|96.67	94.54
ZDHHC14	100.0|100.0	73.1|71.92	100.0|100.0	56.88|100.0	72.95|71.92	100.0|100.0	56.76|100.0	71.92|72.8	29.29|52.35	56.85|100.0	79.34
FAN1	100.0|100.0	100.0|100.0	100.0|100.0	100.0|100.0	100.0|100.0	100.0|100.0	100.0|100.0	100.0|100.0	100.0|100.0	100.0|100.0	100
AURKAIP1	100.0|100.0	100.0|100.0	100.0|100.0	100.0|100.0	100.0|100.0	100.0|100.0	100.0|100.0	100.0|100.0	100.0|100.0	100.0|100.0	100
GCN1	100.0|99.4	100.0|100.0	100.0|100.0	99.85|99.48	99.4|100.0	99.4|100.0	99.26|99.48	100.0|100.0	99.85|99.48	99.85|99.48	99.75
NAGPA	100.0|100.0	100.0|100.0	100.0|100.0	100.0|100.0	100.0|100.0	100.0|100.0	100.0|100.0	100.0|100.0	100.0|100.0	100.0|100.0	100
HOXC6	85.96|85.96	89.36|86.42	85.96|85.96	90.64|82.24	89.36|86.42	85.96|85.96	90.64|82.24	86.42|89.36	90.95|85.33	90.64|82.24	86.9
LEKR1	48.85|92.82	94.2|92.7	93.52|100.0	17.68|78.44	100.0|51.79	84.87|47.97	NA	92.03|100.0	22.18|100.0	22.32|92.22	73.98
UVRAG	90.03|94.39	91.04|89.24	90.03|89.26	34.97|100.0	100.0|94.48	100.0|94.56	36.67|100.0	100.0|100.0	34.28|100.0	34.67|100.0	83.68
ZDHHC7	97.16|100.0	99.05|97.82	97.16|100.0	97.16|100.0	100.0|95.95	100.0|100.0	100.0|100.0	95.95|100.0	95.95|100.0	100.0|100.0	98.81
LOC100470350	100.0|100.0	71.04|96.36	100.0|100.0	70.84|98.45	71.04|96.36	100.0|100.0	70.84|98.45	96.53|70.38	96.44|98.82	70.38|98.91	90.24
TMEM38B	100.0|95.53	100.0|95.53	83.81|79.79	100.0|74.13	100.0|100.0	84.54|84.25	100.0|77.6	84.54|84.25	100.0|77.6	84.25|65.6	88.57
RB1CC1	95.9|96.92	95.9|96.92	95.9|97.23	95.9|96.92	100.0|100.0	100.0|100.0	100.0|100.0	100.0|100.0	100.0|100.0	100.0|100.0	98.58
KDR	100.0|100.0	100.0|100.0	100.0|100.0	100.0|94.03	100.0|100.0	100.0|100.0	100.0|94.03	100.0|100.0	100.0|94.52	100.0|93.96	98.83
TP53BP2	93.75|96.32	93.67|100.0	93.83|99.29	93.75|100.0	96.06|100.0	96.32|99.21	96.66|100.0	100.0|99.21	100.0|100.0	99.21|100.0	97.86
AZI2	100.0|91.61	100.0|98.5	100.0|100.0	100.0|100.0	91.84|98.75	94.41|100.0	91.61|100.0	100.0|100.0	98.5|100.0	100.0|100.0	98.26
FANCB	100.0|100.0	98.59|86.57	97.53|97.19	99.06|98.48	98.58|86.36	97.05|96.48	99.06|98.25	85.43|96.95	86.26|97.66	100.0|100.0	95.98
DCPS	62.3|80.94	61.85|81.31	61.63|80.77	61.85|81.31	99.41|100.0	98.53|99.41	99.41|100.0	99.7|99.41	100.0|100.0	99.41|99.7	88.35
TSNAXIP1	100.0|100.0	100.0|100.0	97.89|99.01	100.0|100.0	100.0|100.0	97.9|99.43	100.0|100.0	95.64|96.59	100.0|100.0	96.59|95.51	98.93
ERLIN1	82.47|92.58	100.0|100.0	100.0|100.0	100.0|100.0	92.58|82.47	92.58|82.47	92.58|82.47	100.0|100.0	100.0|100.0	100.0|100.0	95.01
RTTN	93.3|100.0	100.0|100.0	100.0|100.0	54.43|100.0	100.0|94.45	100.0|93.31	58.31|100.0	100.0|100.0	55.1|100.0	54.36|100.0	90.16
CMTR1	100.0|100.0	100.0|100.0	100.0|100.0	94.97|100.0	100.0|100.0	100.0|100.0	94.97|100.0	100.0|100.0	94.97|100.0	95.5|100.0	99.02
GFUS	80.65|100.0	76.13|69.98	88.69|100.0	89.7|96.23	94.39|69.98	100.0|100.0	84.11|72.78	77.37|95.44	62.36|72.78	86.04|81.4	84.9
CCSER2	77.42|97.24	100.0|100.0	100.0|100.0	51.67|95.58	97.24|77.34	97.48|78.13	64.9|95.58	100.0|100.0	51.63|95.58	52.22|95.93	86.4
KLHL26	88.52|97.67	92.45|99.84	88.82|97.03	78.4|100.0	98.17|96.08	97.83|96.86	86.67|100.0	96.41|97.52	84.83|100.0	85.81|100.0	94.15
ROBO3	98.17|99.79	97.19|99.78	98.31|99.64	97.68|99.36	97.93|98.92	98.93|98.64	98.5|98.57	98.19|96.93	97.69|96.78	96.43|96.78	98.21
MCAM	85.06|96.39	85.89|100.0	86.45|96.45	86.58|99.52	96.55|99.19	100.0|100.0	98.28|99.68	100.0|96.45	100.0|99.68	98.15|100.0	96.22
PDPK1	96.37|100.0	96.37|100.0	100.0|98.75	96.37|100.0	100.0|100.0	100.0|95.17	100.0|100.0	100.0|95.17	100.0|100.0	95.17|100.0	98.67
POMGNT2	94.16|100.0	94.16|100.0	94.16|100.0	94.16|100.0	100.0|100.0	100.0|100.0	100.0|100.0	100.0|100.0	100.0|100.0	100.0|100.0	98.83
EDN1	100.0|100.0	100.0|100.0	100.0|100.0	83.66|100.0	100.0|100.0	100.0|100.0	83.66|100.0	100.0|100.0	83.66|100.0	83.66|100.0	96.73
PSMD2	100.0|99.45	100.0|100.0	100.0|100.0	100.0|100.0	99.45|100.0	99.45|100.0	99.45|100.0	100.0|100.0	100.0|100.0	100.0|100.0	99.89
TRAFD1	89.88|95.97	96.91|97.08	96.91|97.41	96.91|97.08	95.97|90.03	95.97|90.34	95.97|90.03	99.83|100.0	100.0|100.0	100.0|99.83	96.31
BCL6	77.05|77.05	77.05|77.05	77.2|77.09	77.05|77.05	77.05|77.05	77.2|77.09	77.05|77.05	77.2|77.09	77.05|77.05	77.09|77.2	77.09
TAF2	94.99|95.52	94.52|95.04	95.15|99.92	95.07|99.42	100.0|100.0	100.0|100.0	100.0|100.0	100.0|100.0	100.0|100.0	100.0|100.0	98.48
PSIP1	100.0|100.0	100.0|100.0	100.0|100.0	100.0|100.0	100.0|100.0	92.47|92.99	100.0|100.0	100.0|100.0	100.0|100.0	100.0|100.0	99.27
LOC117795239	46.51|46.38	29.36|30.93	44.91|46.05	26.31|30.68	28.7|30.32	44.93|46.2	26.23|30.68	26.34|25.63	27.72|30.68	25.78|29.32	33.68
TMEM164	57.24|100.0	100.0|100.0	100.0|100.0	38.72|100.0	100.0|57.24	100.0|57.43	67.65|100.0	100.0|100.0	38.72|100.0	38.85|100.0	82.79
GATA2	100.0|100.0	100.0|100.0	100.0|100.0	100.0|100.0	100.0|100.0	100.0|100.0	100.0|100.0	100.0|100.0	100.0|100.0	100.0|100.0	100
FAM124A	80.56|59.71	79.15|52.72	82.25|54.48	68.73|86.52	98.33|88.37	98.75|88.25	50.94|86.52	90.43|89.93	46.15|87.23	45.9|87.23	76.11
GOPC	100.0|100.0	100.0|100.0	100.0|100.0	100.0|100.0	100.0|100.0	100.0|100.0	100.0|100.0	100.0|100.0	100.0|100.0	100.0|100.0	100
SYNC	68.64|68.64	68.64|68.79	69.07|69.36	100.0|92.55	100.0|100.0	100.0|100.0	96.82|89.61	100.0|100.0	97.03|89.61	67.02|61.76	85.38
BSN	93.67|95.31	98.62|98.57	99.56|98.63	94.11|95.38	100.0|98.46	96.12|93.58	100.0|100.0	93.11|92.29	96.8|98.16	93.91|96.08	96.62
FAAP24	62.85|73.95	62.85|73.95	63.24|72.4	62.85|59.77	99.53|99.53	99.53|96.83	100.0|80.83	99.53|96.83	99.53|80.45	96.83|80.45	83.09
CARD14	97.38|100.0	76.0|100.0	97.28|100.0	98.06|100.0	78.54|100.0	99.9|100.0	100.0|100.0	100.0|78.28	100.0|78.45	100.0|100.0	95.19
ENAH	96.05|98.16	92.81|100.0	97.01|100.0	96.53|98.65	97.8|100.0	97.18|98.76	98.65|98.65	100.0|100.0	100.0|97.43	99.25|97.67	98.23
IRF2BP1	100.0|100.0	100.0|100.0	100.0|100.0	100.0|100.0	100.0|100.0	100.0|100.0	100.0|100.0	100.0|100.0	100.0|100.0	100.0|100.0	100
SLC22A6	100.0|100.0	100.0|100.0	100.0|100.0	100.0|100.0	100.0|100.0	99.64|100.0	100.0|100.0	92.9|95.96	100.0|100.0	95.96|97.76	99.11
USH2A	100.0|99.94	100.0|100.0	100.0|100.0	3.21|99.4	100.0|100.0	100.0|100.0	3.25|100.0	100.0|100.0	3.59|99.4	3.24|100.0	80.6
TP53	85.62|100.0	85.62|100.0	88.54|100.0	87.87|100.0	100.0|100.0	100.0|99.49	100.0|100.0	100.0|100.0	100.0|100.0	100.0|100.0	97.36
ANGPTL8	100.0|100.0	100.0|100.0	100.0|100.0	100.0|100.0	100.0|100.0	100.0|100.0	100.0|100.0	100.0|100.0	100.0|100.0	100.0|100.0	100
DNAL1	95.22|100.0	90.43|98.95	90.43|99.47	72.25|100.0	94.97|98.95	94.97|99.47	75.88|100.0	98.95|99.47	79.06|100.0	79.47|100.0	93.4
TNFSF13B	78.92|100.0	78.92|100.0	83.78|100.0	78.92|100.0	100.0|100.0	100.0|100.0	100.0|100.0	100.0|99.68	100.0|100.0	99.03|100.0	95.96
CACNG4	80.89|79.87	80.89|83.55	80.89|77.68	80.89|100.0	95.6|100.0	100.0|97.25	79.87|100.0	100.0|92.97	83.55|100.0	77.68|100.0	89.58
THADA	100.0|100.0	74.68|98.45	100.0|100.0	65.56|100.0	74.6|98.24	100.0|100.0	65.47|100.0	98.38|75.13	86.28|100.0	65.89|100.0	90.13
MRPL43	97.48|58.94	100.0|100.0	98.74|98.74	97.48|77.5	58.94|97.48	60.46|100.0	59.32|78.0	98.74|98.74	97.48|77.5	96.86|77.0	86.47
ACKR1	100.0|100.0	100.0|100.0	100.0|100.0	100.0|100.0	100.0|100.0	100.0|100.0	100.0|100.0	100.0|100.0	100.0|100.0	100.0|100.0	100
KLC4	100.0|89.93	100.0|100.0	100.0|100.0	100.0|100.0	89.93|100.0	90.36|100.0	89.93|100.0	100.0|100.0	100.0|100.0	100.0|100.0	98.01
WDTC1	100.0|100.0	100.0|100.0	100.0|100.0	100.0|100.0	100.0|100.0	100.0|100.0	100.0|100.0	100.0|100.0	100.0|100.0	100.0|100.0	100
MEF2C	100.0|100.0	100.0|100.0	100.0|100.0	82.82|100.0	100.0|100.0	100.0|100.0	92.38|100.0	100.0|100.0	82.82|100.0	82.85|100.0	97.04
GDAP2	100.0|100.0	100.0|100.0	99.8|90.84	100.0|100.0	100.0|100.0	99.8|90.84	100.0|100.0	99.8|90.84	100.0|100.0	90.84|99.8	98.13
CNOT9	100.0|100.0	100.0|100.0	100.0|100.0	100.0|100.0	100.0|100.0	100.0|100.0	100.0|100.0	100.0|100.0	100.0|100.0	100.0|100.0	100
SUDS3	57.08|85.99	68.92|99.39	69.34|98.8	86.26|99.51	85.99|82.32	88.22|83.43	86.31|66.1	99.09|97.89	100.0|80.0	97.89|79.27	85.59
RNF157	91.62|98.2	91.9|100.0	92.04|96.77	86.17|97.94	98.5|100.0	100.0|98.68	92.37|97.94	100.0|96.77	94.22|98.41	90.75|98.1	96.02
ANGEL2	100.0|100.0	100.0|100.0	100.0|100.0	100.0|100.0	100.0|100.0	100.0|100.0	100.0|100.0	100.0|100.0	100.0|100.0	100.0|100.0	100
MYPN	100.0|100.0	100.0|100.0	100.0|100.0	31.32|100.0	100.0|100.0	100.0|100.0	31.36|100.0	100.0|100.0	31.36|100.0	31.48|100.0	86.28
FASTKD3	97.43|100.0	100.0|100.0	100.0|100.0	100.0|100.0	99.69|97.12	99.22|96.52	100.0|97.42	100.0|100.0	100.0|100.0	100.0|100.0	99.37
CAVIN3	89.71|100.0	89.71|100.0	91.18|100.0	90.13|100.0	100.0|100.0	100.0|100.0	100.0|100.0	100.0|100.0	100.0|100.0	100.0|100.0	98.04
TOLLIP	92.17|94.53	92.17|83.28	96.09|98.54	92.17|83.55	99.27|87.46	95.99|95.99	99.27|87.74	84.57|95.99	89.07|89.35	95.99|84.84	91.9
NUMBL	84.52|100.0	85.94|100.0	85.37|99.5	89.91|86.24	100.0|100.0	100.0|100.0	100.0|83.11	100.0|100.0	100.0|84.6	100.0|84.47	94.18
TNK2	98.44|97.29	97.71|92.54	98.44|100.0	98.44|98.71	100.0|100.0	98.37|100.0	98.55|100.0	92.19|99.16	92.19|97.61	100.0|100.0	97.98
EPSTI1	84.51|82.57	84.51|79.68	84.51|79.94	83.84|75.45	100.0|100.0	100.0|100.0	88.82|81.82	100.0|100.0	86.03|82.12	89.17|84.85	88.39
FAXDC2	68.1|99.7	68.1|95.69	63.6|99.36	68.1|100.0	100.0|95.98	92.22|98.4	99.7|100.0	88.79|98.72	95.69|100.0	98.72|92.79	91.18
CRP	89.11|100.0	89.52|99.55	90.73|100.0	89.92|100.0	94.12|93.27	100.0|100.0	97.74|96.86	100.0|99.56	99.55|99.55	100.0|100.0	96.97
AP1AR	100.0|100.0	100.0|100.0	100.0|100.0	56.95|80.37	100.0|100.0	100.0|100.0	56.48|79.44	100.0|100.0	56.62|79.91	71.48|99.53	89.04
PCP2	100.0|100.0	100.0|100.0	100.0|100.0	100.0|100.0	100.0|100.0	100.0|100.0	100.0|100.0	100.0|100.0	100.0|100.0	100.0|100.0	100
LOC100469362	100.0|100.0	89.77|99.77	99.79|99.79	46.97|100.0	89.77|99.77	99.79|99.79	46.97|100.0	99.54|89.56	49.42|94.67	46.97|100.0	87.62
SUSD1	93.26|100.0	93.64|96.78	100.0|100.0	43.71|98.83	98.13|91.29	99.86|92.15	48.56|98.83	94.1|93.35	45.17|98.83	44.55|98.24	86.46
MYORG	100.0|100.0	100.0|100.0	100.0|100.0	95.38|100.0	100.0|100.0	100.0|100.0	95.38|100.0	100.0|100.0	95.38|100.0	95.39|100.0	99.08
ERBB2	100.0|100.0	100.0|100.0	100.0|100.0	98.26|99.92	100.0|100.0	100.0|100.0	98.1|99.52	100.0|100.0	98.1|99.52	98.49|99.6	99.58
SSPOP	100.0|100.0	100.0|100.0	100.0|100.0	70.72|98.31	100.0|100.0	100.0|100.0	70.32|97.55	100.0|100.0	69.72|97.14	69.58|97.33	93.53
PTCD1	93.37|100.0	94.43|97.67	92.31|100.0	94.43|96.09	100.0|96.57	99.86|100.0	100.0|95.01	96.43|100.0	97.67|96.09	100.0|94.87	97.24
L3MBTL3	100.0|100.0	100.0|100.0	100.0|100.0	83.29|100.0	100.0|100.0	100.0|100.0	74.1|100.0	100.0|100.0	74.1|100.0	65.57|100.0	94.85
CNOT3	91.85|95.88	91.97|96.4	91.85|96.01	91.85|96.39	100.0|100.0	100.0|100.0	100.0|100.0	100.0|100.0	100.0|100.0	100.0|100.0	97.61
DCBLD2	90.91|89.33	96.07|91.24	95.93|91.94	97.96|91.39	99.47|96.13	89.2|87.0	100.0|96.2	91.11|91.94	100.0|100.0	93.76|91.27	94.04
FAM216B	69.89|83.67	69.89|87.23	52.84|67.39	69.89|87.23	92.52|96.45	80.95|86.23	92.52|96.45	79.43|81.16	100.0|100.0	68.84|67.38	81.5
FER1L5	100.0|100.0	100.0|100.0	100.0|94.95	73.39|96.51	100.0|100.0	100.0|100.0	66.24|96.73	100.0|100.0	66.87|100.0	66.88|96.94	92.93
FGF21	100.0|100.0	100.0|100.0	100.0|100.0	100.0|100.0	100.0|100.0	100.0|100.0	100.0|100.0	100.0|100.0	100.0|100.0	100.0|100.0	100
NDUFS4	72.57|100.0	100.0|100.0	100.0|100.0	50.86|100.0	100.0|72.57	100.0|72.57	70.08|100.0	100.0|100.0	50.86|100.0	50.86|100.0	87.02
ITGAV	95.26|93.89	95.35|94.08	95.45|94.44	91.87|99.89	99.9|100.0	100.0|100.0	90.55|99.89	100.0|100.0	90.64|99.89	91.0|100.0	96.61
RNF168	80.68|82.52	80.34|82.6	80.17|82.72	80.34|82.46	100.0|100.0	99.83|100.0	100.0|100.0	99.82|100.0	100.0|100.0	100.0|99.82	92.57
NSUN7	65.54|96.95	67.51|99.86	61.89|93.76	65.54|96.95	100.0|100.0	97.51|99.86	100.0|100.0	97.51|99.86	100.0|100.0	100.0|97.78	92.03
TASOR	89.61|99.01	94.87|94.98	84.54|94.53	89.79|99.14	93.14|84.4	94.59|95.73	100.0|100.0	84.64|94.53	84.58|93.28	96.13|94.92	93.12
GATA4	100.0|100.0	100.0|100.0	100.0|100.0	53.39|100.0	100.0|100.0	100.0|100.0	53.39|100.0	100.0|100.0	53.27|100.0	53.85|100.0	90.7
PLA2G4E	90.91|100.0	96.97|100.0	98.2|100.0	90.12|95.48	100.0|93.86	100.0|92.57	99.14|95.48	99.65|98.29	93.05|95.48	93.37|97.15	96.49
RELL2	100.0|100.0	100.0|100.0	100.0|100.0	100.0|75.56	100.0|100.0	100.0|100.0	100.0|75.56	100.0|100.0	100.0|75.56	100.0|75.56	95.11
SLC12A8	99.71|91.59	99.71|91.35	99.86|99.01	72.53|93.89	100.0|100.0	93.82|100.0	66.49|93.7	92.92|100.0	66.32|93.7	72.2|94.26	91.05
FYCO1	100.0|100.0	100.0|100.0	100.0|100.0	99.31|99.66	100.0|99.93	100.0|100.0	99.93|99.04	100.0|100.0	98.66|100.0	100.0|100.0	99.83
CABIN1	100.0|100.0	90.16|100.0	100.0|100.0	53.71|99.83	92.32|100.0	100.0|100.0	54.99|99.83	100.0|90.17	48.48|81.21	53.68|99.83	88.21
THAP1	76.42|81.74	76.83|88.73	76.83|90.0	76.83|88.73	92.17|99.53	92.17|100.0	92.17|99.53	100.0|100.0	100.0|100.0	100.0|100.0	91.58
ADCY3	100.0|100.0	94.85|94.36	99.91|100.0	72.16|92.61	94.85|94.27	100.0|100.0	72.14|92.5	94.36|94.93	66.58|85.89	72.14|92.5	90.7
NEURL1	95.0|95.99	100.0|100.0	95.0|95.99	100.0|100.0	95.12|93.98	100.0|100.0	97.21|96.04	93.98|95.12	100.0|100.0	99.13|97.93	97.52
FBXL4	100.0|100.0	100.0|100.0	100.0|100.0	100.0|100.0	100.0|100.0	100.0|100.0	100.0|100.0	100.0|100.0	100.0|100.0	100.0|100.0	100
KIDINS220	55.87|71.95	78.33|78.64	79.29|78.36	2.03|63.16	71.37|55.64	73.55|56.44	2.62|63.16	79.6|78.36	2.04|63.16	2.01|63.16	55.94
ST6GALNAC5	100.0|100.0	100.0|100.0	100.0|100.0	73.96|85.03	100.0|100.0	100.0|100.0	75.08|85.03	100.0|100.0	76.22|85.03	74.63|85.03	92
CARD6	88.08|92.16	87.71|93.37	87.9|82.81	87.71|94.09	91.49|93.08	89.98|81.02	90.64|92.93	90.87|80.43	91.15|91.86	80.17|91.28	88.94
GCNT3	99.77|100.0	99.77|100.0	99.54|100.0	100.0|100.0	100.0|100.0	100.0|100.0	100.0|99.55	100.0|100.0	100.0|99.55	99.08|98.41	99.78
SMIM8	100.0|93.27	100.0|72.93	100.0|100.0	100.0|100.0	100.0|78.2	93.27|100.0	93.27|100.0	72.93|100.0	72.93|100.0	100.0|100.0	93.84
LLGL2	100.0|100.0	100.0|100.0	100.0|100.0	100.0|95.51	100.0|100.0	100.0|100.0	100.0|95.51	100.0|100.0	100.0|95.51	100.0|98.22	99.24
FGF23	77.56|98.78	77.56|98.78	79.49|98.8	77.56|98.78	100.0|100.0	100.0|98.8	99.59|99.59	100.0|100.0	99.59|99.59	99.6|100.0	95.2
EMC1	97.91|99.3	100.0|99.33	98.61|99.6	98.21|99.2	100.0|100.0	100.0|100.0	100.0|99.7	99.71|100.0	100.0|100.0	99.9|99.9	99.57
ST8SIA3	97.44|100.0	97.44|100.0	97.44|100.0	97.44|100.0	100.0|100.0	100.0|100.0	100.0|100.0	100.0|100.0	100.0|100.0	100.0|100.0	99.49
NFE2L3	100.0|92.75	100.0|92.87	100.0|95.45	100.0|94.21	100.0|100.0	100.0|100.0	100.0|100.0	100.0|100.0	100.0|100.0	100.0|100.0	98.76
ASB3	100.0|100.0	100.0|100.0	100.0|93.44	72.62|100.0	100.0|100.0	100.0|93.09	72.9|100.0	100.0|93.26	72.9|100.0	67.91|100.0	93.31
GKAP1	90.16|100.0	90.16|95.87	90.93|95.9	50.0|93.69	100.0|100.0	100.0|100.0	62.94|95.63	100.0|100.0	53.17|93.69	53.83|95.63	88.08
BORA	91.01|82.39	91.01|89.86	91.19|94.67	91.01|80.39	89.87|98.01	91.86|100.0	90.53|88.33	100.0|100.0	96.74|86.55	100.0|89.95	92.17
CREM	100.0|100.0	100.0|100.0	100.0|100.0	95.56|100.0	100.0|100.0	100.0|100.0	95.56|100.0	100.0|100.0	95.56|100.0	96.36|100.0	99.15
CUTC	100.0|100.0	100.0|100.0	99.27|99.63	100.0|84.78	100.0|100.0	99.27|99.63	100.0|84.78	99.37|100.0	100.0|99.07	99.63|84.16	97.48
LRRTM3	99.83|99.83	99.83|99.83	100.0|100.0	88.3|100.0	100.0|100.0	100.0|99.83	88.3|100.0	100.0|99.83	88.3|100.0	88.32|100.0	97.61
COMMD4	59.87|92.96	59.87|92.96	59.87|92.96	68.61|99.53	99.5|99.5	99.5|99.5	92.96|86.85	100.0|100.0	92.96|86.85	92.96|86.85	88.2
RUFY3	83.05|90.6	100.0|100.0	100.0|100.0	83.05|90.6	91.38|83.29	87.62|83.56	100.0|100.0	100.0|100.0	83.29|91.38	83.56|87.62	91.95
MRPS28	100.0|96.79	100.0|97.31	100.0|97.31	73.48|100.0	100.0|100.0	98.4|98.92	71.12|100.0	98.39|98.39	71.51|100.0	71.51|100.0	93.66
NMBR	100.0|100.0	100.0|97.01	100.0|100.0	100.0|97.01	100.0|97.01	100.0|100.0	100.0|97.01	97.01|100.0	100.0|100.0	100.0|97.01	99.1
POLI	48.01|100.0	99.43|93.57	99.86|95.12	100.0|98.46	100.0|45.04	100.0|46.13	100.0|46.98	100.0|100.0	93.43|97.76	97.42|100.0	88.06
METTL27	100.0|100.0	100.0|100.0	93.28|99.16	84.98|83.98	100.0|100.0	93.28|99.16	86.56|85.55	79.13|84.45	79.13|78.52	90.34|83.98	91.08
DAG1	98.43|98.54	98.43|98.43	98.54|98.43	98.43|98.54	98.54|98.43	97.64|97.42	98.43|98.43	98.54|98.43	98.43|98.54	98.43|98.65	98.38
SAXO1	96.65|98.09	85.74|100.0	99.37|99.58	96.65|93.13	87.02|100.0	98.3|97.06	98.3|93.33	100.0|86.13	100.0|82.63	97.06|93.33	95.12
PIK3R1	100.0|100.0	100.0|100.0	100.0|100.0	84.0|99.35	100.0|100.0	100.0|100.0	84.0|99.35	100.0|100.0	84.0|99.35	84.67|100.0	96.74
MLF1	80.0|85.61	89.84|96.82	80.0|86.52	80.0|85.61	100.0|100.0	100.0|100.0	100.0|100.0	100.0|100.0	100.0|100.0	100.0|100.0	94.22
CAPN6	100.0|100.0	100.0|100.0	100.0|100.0	100.0|100.0	100.0|100.0	100.0|100.0	100.0|100.0	100.0|100.0	100.0|100.0	100.0|100.0	100
IQCK	62.02|99.44	99.65|99.65	100.0|99.31	71.78|99.52	99.44|62.02	97.77|60.34	53.07|45.89	100.0|100.0	71.78|99.52	70.69|99.03	84.55
CACNG1	100.0|100.0	100.0|100.0	100.0|100.0	100.0|100.0	100.0|100.0	100.0|100.0	100.0|100.0	100.0|100.0	100.0|100.0	100.0|100.0	100
CILP2	98.45|97.78	99.91|99.57	100.0|100.0	100.0|100.0	95.47|95.8	94.96|95.7	95.99|96.65	97.34|97.76	99.57|99.91	99.05|98.97	98.14
GPR55	95.56|98.18	100.0|91.92	94.67|97.86	89.05|100.0	98.18|81.57	98.18|98.78	91.49|100.0	83.08|100.0	76.01|100.0	94.5|100.0	94.45
SLC1A3	100.0|100.0	100.0|100.0	100.0|100.0	80.26|100.0	100.0|100.0	100.0|100.0	80.26|100.0	100.0|100.0	80.26|100.0	80.29|100.0	96.05
GTF3C1	100.0|100.0	100.0|100.0	100.0|100.0	100.0|100.0	100.0|100.0	100.0|100.0	100.0|100.0	100.0|100.0	100.0|100.0	100.0|100.0	100
MUC4	97.44|100.0	97.88|77.11	97.44|31.79	56.27|41.28	100.0|76.62	100.0|31.79	58.04|41.41	90.74|37.58	9.46|8.81	18.62|41.87	60.71
TSPYL2	62.69|64.39	3.05|2.95	62.14|66.17	2.5|2.55	2.99|2.82	62.82|65.14	2.56|2.55	59.46|65.44	45.77|48.37	49.48|47.52	36.07
GINS4	76.63|100.0	76.63|100.0	76.63|100.0	76.63|100.0	100.0|100.0	100.0|100.0	100.0|100.0	100.0|100.0	100.0|100.0	100.0|100.0	95.33
BATF2	100.0|100.0	100.0|100.0	100.0|100.0	100.0|100.0	100.0|100.0	100.0|100.0	100.0|100.0	100.0|100.0	100.0|100.0	100.0|100.0	100
HDHD2	98.48|100.0	98.48|100.0	98.48|100.0	98.48|100.0	100.0|100.0	100.0|100.0	100.0|100.0	100.0|100.0	100.0|100.0	100.0|100.0	99.7
ABHD5	55.57|94.27	56.08|83.0	55.41|93.45	55.41|94.25	98.28|85.75	99.43|98.86	99.43|99.71	85.25|97.15	85.25|97.99	99.15|100.0	86.68
ABHD15	60.48|81.02	93.61|100.0	93.81|100.0	88.82|96.74	79.41|64.01	81.02|66.01	77.81|63.26	100.0|100.0	98.71|99.57	100.0|99.78	87.2
ZBTB20	100.0|100.0	100.0|100.0	100.0|100.0	99.6|98.27	100.0|100.0	100.0|100.0	99.6|98.27	100.0|100.0	99.6|98.27	99.6|98.27	99.57
JUNB	100.0|100.0	100.0|100.0	100.0|100.0	92.8|100.0	100.0|100.0	100.0|100.0	92.8|100.0	100.0|100.0	92.8|100.0	91.28|100.0	98.48
PLEKHM3	100.0|100.0	100.0|100.0	100.0|100.0	82.69|100.0	100.0|100.0	100.0|100.0	82.59|100.0	100.0|100.0	82.69|100.0	82.79|100.0	96.54
HPS5	100.0|100.0	98.41|98.07	100.0|100.0	91.35|100.0	98.41|97.71	100.0|100.0	91.32|100.0	97.71|98.67	90.68|100.0	91.39|100.0	97.69
MYLK	99.01|100.0	99.01|99.9	99.5|100.0	33.17|98.38	100.0|99.45	99.54|99.54	34.31|98.38	99.45|100.0	33.47|98.38	34.31|98.38	86.21
CATSPER3	91.02|99.46	100.0|100.0	98.5|100.0	100.0|100.0	99.46|91.25	98.09|91.14	100.0|93.75	98.5|99.75	100.0|100.0	100.0|100.0	98.05
ETS2	96.9|100.0	97.11|99.79	97.11|100.0	100.0|100.0	100.0|99.58	100.0|100.0	100.0|100.0	99.79|100.0	100.0|100.0	100.0|100.0	99.51
MYRFL	100.0|100.0	100.0|100.0	100.0|100.0	22.48|95.75	100.0|100.0	100.0|100.0	22.26|95.75	100.0|100.0	22.33|95.75	22.68|96.7	83.69
PRC1	90.31|99.29	100.0|100.0	100.0|100.0	100.0|73.29	100.0|91.29	100.0|91.29	100.0|66.9	100.0|100.0	100.0|73.29	100.0|73.29	92.95
NUAK1	100.0|100.0	100.0|100.0	100.0|100.0	84.83|100.0	100.0|100.0	100.0|100.0	84.58|100.0	100.0|100.0	84.33|100.0	85.87|100.0	96.98
SERPINB11	87.06|97.3	85.96|100.0	85.96|100.0	85.96|100.0	96.08|100.0	96.08|100.0	96.08|100.0	100.0|100.0	100.0|100.0	100.0|100.0	96.52
LOC100463568	93.45|95.58	85.1|92.3	90.81|95.18	76.46|100.0	87.61|92.9	92.45|94.74	71.37|94.53	84.89|82.04	77.64|96.98	68.76|88.87	88.08
NCKAP5	93.12|96.84	100.0|100.0	100.0|100.0	69.85|100.0	96.84|94.27	97.42|97.01	72.49|99.93	100.0|100.0	70.56|99.93	72.03|99.71	93
SPATA32	100.0|100.0	100.0|100.0	100.0|100.0	90.98|100.0	72.94|64.55	64.46|72.75	74.01|85.32	100.0|100.0	75.12|97.86	91.62|93.58	89.16
MYMK	100.0|100.0	100.0|100.0	100.0|100.0	100.0|80.66	100.0|100.0	100.0|100.0	100.0|80.66	100.0|100.0	100.0|80.66	100.0|80.66	96.13
ST3GAL4	98.23|100.0	100.0|86.11	100.0|100.0	100.0|86.04	100.0|83.08	99.7|98.2	99.7|82.99	84.6|100.0	100.0|100.0	100.0|84.52	95.16
XIRP2	100.0|100.0	100.0|100.0	100.0|88.24	99.97|100.0	100.0|99.97	99.79|87.24	98.55|100.0	99.73|87.37	98.52|100.0	85.97|100.0	97.27
TRNAU1AP	100.0|100.0	86.41|96.5	100.0|100.0	99.3|80.74	86.41|96.5	100.0|100.0	100.0|81.3	96.5|86.41	95.72|69.69	99.3|80.74	92.78
FOXN4	98.47|100.0	100.0|100.0	100.0|100.0	98.47|100.0	100.0|100.0	100.0|100.0	100.0|100.0	100.0|100.0	100.0|100.0	100.0|100.0	99.85
SERTAD4	100.0|100.0	100.0|100.0	100.0|100.0	100.0|100.0	100.0|100.0	100.0|100.0	100.0|100.0	100.0|100.0	100.0|100.0	100.0|100.0	100
ANKRD6	100.0|100.0	100.0|100.0	99.73|100.0	100.0|100.0	100.0|100.0	99.72|100.0	100.0|100.0	99.72|100.0	100.0|100.0	100.0|99.72	99.94
TRDMT1	100.0|100.0	100.0|100.0	100.0|94.46	95.14|100.0	99.49|99.49	100.0|94.46	94.63|99.46	99.74|93.98	95.14|100.0	89.88|100.0	97.79
ANKRD16	87.19|87.92	100.0|98.9	100.0|100.0	100.0|99.72	97.19|95.32	98.6|97.23	88.76|87.05	98.9|99.45	99.45|99.45	99.45|98.9	96.67
BRDT	100.0|100.0	100.0|100.0	100.0|100.0	75.81|98.87	100.0|100.0	100.0|100.0	73.52|97.75	100.0|100.0	74.65|97.46	65.17|87.75	93.55
DGAT2	84.67|99.72	82.31|91.84	85.14|93.04	81.84|85.05	96.67|91.58	96.67|89.69	96.67|85.29	93.68|91.75	94.74|88.24	100.0|95.1	91.18
DYNLRB2	95.83|92.93	100.0|100.0	100.0|100.0	100.0|59.26	92.93|95.83	92.93|95.83	92.93|56.79	100.0|100.0	100.0|59.26	100.0|59.26	89.69
C3H5orf46	63.03|82.42	57.98|82.14	63.87|81.72	58.82|72.92	89.01|96.43	100.0|97.85	82.42|78.12	100.0|96.77	82.14|71.88	81.72|79.17	80.92
MOSPD2	100.0|100.0	100.0|100.0	100.0|100.0	100.0|100.0	100.0|100.0	100.0|100.0	100.0|100.0	100.0|100.0	100.0|100.0	100.0|100.0	100
OPRK1	100.0|100.0	100.0|100.0	100.0|92.91	100.0|100.0	100.0|100.0	100.0|92.91	100.0|100.0	100.0|92.91	100.0|100.0	92.91|100.0	98.58
NRK	100.0|100.0	100.0|100.0	100.0|100.0	100.0|100.0	100.0|100.0	100.0|100.0	100.0|100.0	100.0|100.0	97.02|100.0	100.0|100.0	99.85
C8H1orf100	98.55|93.15	100.0|100.0	96.38|91.72	94.2|100.0	93.15|98.55	91.1|91.72	87.67|98.46	96.38|91.72	94.2|100.0	78.62|87.69	94.16
TNP1	100.0|100.0	100.0|100.0	100.0|100.0	100.0|100.0	100.0|100.0	100.0|100.0	100.0|100.0	100.0|100.0	100.0|100.0	100.0|100.0	100
TM6SF1	92.43|99.71	75.41|100.0	100.0|100.0	75.41|100.0	82.22|100.0	99.71|92.43	82.22|100.0	100.0|75.41	100.0|100.0	75.41|100.0	92.52
TANC2	100.0|100.0	100.0|100.0	100.0|100.0	72.3|100.0	100.0|100.0	100.0|100.0	72.14|100.0	100.0|100.0	72.3|100.0	74.92|100.0	94.58
ODF1	100.0|100.0	100.0|100.0	81.93|82.26	100.0|100.0	100.0|100.0	81.93|82.26	100.0|100.0	81.93|82.26	100.0|100.0	82.26|82.93	92.89
MRPL19	100.0|100.0	100.0|99.32	100.0|100.0	100.0|100.0	100.0|99.32	100.0|100.0	100.0|100.0	99.32|100.0	99.66|100.0	100.0|100.0	99.88
SERINC3	100.0|100.0	100.0|100.0	100.0|100.0	100.0|100.0	100.0|100.0	100.0|100.0	100.0|100.0	100.0|100.0	100.0|100.0	100.0|100.0	100
PYM1	100.0|100.0	94.58|88.48	100.0|100.0	94.58|95.52	94.58|88.48	100.0|100.0	94.58|95.52	90.78|97.04	88.48|95.52	94.58|95.52	95.41
SCRIB	83.1|85.55	82.72|79.77	84.89|79.94	74.17|100.0	82.4|77.18	85.16|77.9	73.41|100.0	79.52|77.66	69.07|100.0	67.63|100.0	83
LRTM2	100.0|100.0	100.0|100.0	100.0|100.0	100.0|100.0	100.0|100.0	100.0|100.0	100.0|100.0	100.0|100.0	100.0|100.0	100.0|100.0	100
VWA5B2	100.0|100.0	100.0|95.36	100.0|100.0	100.0|100.0	100.0|95.36	100.0|100.0	100.0|100.0	95.97|100.0	95.36|100.0	100.0|100.0	99.1
THNSL2	98.76|99.79	98.76|99.79	99.38|99.59	98.97|86.15	100.0|100.0	98.54|97.72	100.0|86.33	98.54|97.72	100.0|86.33	97.93|85.07	96.47
GPR156	100.0|100.0	100.0|100.0	100.0|100.0	90.97|100.0	100.0|100.0	100.0|100.0	90.74|100.0	100.0|100.0	90.42|100.0	90.98|100.0	98.16
NOL3	76.47|71.89	76.47|76.47	75.49|70.0	76.47|73.58	73.73|78.43	72.35|71.36	73.73|75.47	76.96|71.36	79.41|76.42	71.36|74.06	74.57
DCAF12	92.15|98.45	92.15|98.45	88.43|94.48	92.15|98.45	100.0|100.0	100.0|100.0	100.0|100.0	100.0|100.0	100.0|100.0	100.0|100.0	97.74
LOC100478860	100.0|95.68	39.94|55.17	100.0|95.67	100.0|85.13	38.3|55.39	100.0|100.0	96.57|86.06	57.54|39.85	55.17|34.0	96.57|85.92	75.85
SYAP1	94.97|96.32	94.97|94.71	96.65|94.79	94.69|96.58	96.6|94.99	98.58|95.34	94.62|95.16	98.61|96.99	95.26|97.44	95.34|99.15	96.09
VWA2	88.24|95.3	88.24|95.3	88.24|94.82	86.24|94.83	99.75|99.75	99.11|98.61	97.71|99.48	98.98|98.48	97.84|99.61	95.7|97.93	95.71
DRD2	100.0|100.0	100.0|100.0	100.0|100.0	100.0|100.0	100.0|100.0	100.0|100.0	100.0|100.0	100.0|100.0	100.0|100.0	100.0|100.0	100
DPH1	93.27|93.69	100.0|95.16	93.72|95.43	93.95|95.66	100.0|99.79	98.2|99.54	98.87|100.0	99.37|100.0	99.58|100.0	98.63|98.63	97.67
PACRG	42.02|85.04	100.0|100.0	93.77|100.0	33.46|97.73	85.04|42.02	85.04|44.81	67.72|97.73	93.77|100.0	33.46|97.73	35.68|97.73	76.64
RNF141	63.41|79.13	63.41|79.13	63.41|79.13	63.41|79.13	100.0|100.0	100.0|100.0	100.0|100.0	100.0|100.0	100.0|100.0	100.0|100.0	88.51
ZNF438	91.6|100.0	91.6|99.63	91.83|100.0	88.47|100.0	100.0|99.39	99.51|100.0	96.45|100.0	100.0|100.0	95.86|100.0	97.12|99.36	97.54
LRFN5	98.89|99.3	98.89|99.3	97.51|94.37	98.89|100.0	100.0|100.0	97.91|94.37	100.0|100.0	97.91|94.37	100.0|100.0	94.37|98.88	98.25
WDR6	100.0|100.0	100.0|100.0	100.0|100.0	100.0|90.4	100.0|100.0	100.0|100.0	100.0|90.4	100.0|100.0	100.0|90.4	100.0|90.8	98.1
RAB39A	81.86|100.0	100.0|100.0	100.0|100.0	96.28|86.25	100.0|81.11	100.0|81.11	100.0|73.33	100.0|100.0	95.39|86.25	95.39|86.25	93.16
ZNF205	60.29|61.17	62.27|56.46	59.75|64.65	60.83|59.86	63.74|56.96	59.71|63.67	60.44|58.61	56.3|67.19	57.28|62.17	64.65|58.79	60.74
RO60	96.59|100.0	96.23|98.17	96.59|100.0	96.59|100.0	99.63|98.17	100.0|100.0	100.0|100.0	98.17|99.63	98.17|99.63	100.0|100.0	98.88
ADD3	100.0|100.0	88.81|82.94	100.0|100.0	100.0|100.0	86.26|80.56	100.0|100.0	100.0|100.0	80.56|86.26	78.84|84.42	100.0|100.0	93.43
CCDC181	100.0|100.0	100.0|100.0	100.0|100.0	100.0|96.76	100.0|100.0	100.0|100.0	100.0|96.76	100.0|100.0	100.0|96.76	100.0|97.14	99.37
PARN	93.53|97.49	93.68|97.65	93.53|99.68	73.38|79.61	100.0|100.0	100.0|100.0	76.49|79.61	100.0|100.0	76.49|79.61	77.08|78.47	89.82
HAX1	38.54|97.37	96.53|91.15	100.0|100.0	76.04|87.25	100.0|37.38	100.0|40.71	100.0|45.42	88.85|96.79	69.18|84.06	75.36|84.06	80.43
ZC3H4	100.0|100.0	100.0|100.0	73.98|75.22	48.59|89.34	100.0|100.0	75.44|75.14	49.68|89.48	74.04|74.98	48.7|89.19	49.0|88.62	80.07
XK	100.0|100.0	100.0|100.0	100.0|100.0	61.26|100.0	100.0|100.0	100.0|100.0	61.26|100.0	100.0|100.0	61.26|100.0	61.43|100.0	92.26
GPR45	100.0|100.0	100.0|100.0	100.0|100.0	100.0|100.0	100.0|100.0	100.0|100.0	100.0|100.0	100.0|100.0	100.0|100.0	100.0|100.0	100
RNF213	100.0|86.39	100.0|85.58	99.93|86.39	89.67|100.0	100.0|100.0	100.0|100.0	77.86|100.0	100.0|100.0	77.14|100.0	77.83|100.0	94.04
EPB41L5	100.0|100.0	26.43|90.87	100.0|100.0	59.36|78.84	29.92|100.0	100.0|100.0	61.75|79.72	97.72|28.96	NA	62.11|80.95	77.59
ASB9	100.0|100.0	100.0|100.0	100.0|100.0	91.13|97.09	100.0|100.0	100.0|100.0	89.76|95.64	100.0|100.0	91.13|97.09	95.86|100.0	97.89
MBD6	100.0|100.0	100.0|100.0	100.0|100.0	100.0|100.0	100.0|100.0	100.0|100.0	100.0|100.0	100.0|100.0	100.0|100.0	100.0|100.0	100
CNDP1	84.02|100.0	100.0|93.44	99.22|100.0	100.0|100.0	100.0|78.51	100.0|87.6	100.0|85.18	87.43|97.56	90.53|98.22	97.56|94.86	94.71
LOC100468117	70.53|100.0	44.04|56.6	100.0|99.02	44.37|75.28	15.02|13.62	100.0|69.84	20.66|24.72	47.66|36.72	81.7|100.0	39.02|66.85	60.28
ME2	96.21|99.15	96.21|100.0	96.21|99.15	96.21|100.0	99.15|100.0	100.0|100.0	99.15|100.0	100.0|99.15	100.0|100.0	99.15|100.0	98.99
CLOCK	80.91|87.03	97.42|98.35	98.95|98.83	98.95|98.26	88.92|83.45	88.92|82.57	89.04|82.21	100.0|100.0	100.0|100.0	100.0|100.0	93.69
ZDHHC16	100.0|100.0	100.0|100.0	100.0|100.0	100.0|93.32	100.0|100.0	100.0|100.0	100.0|93.32	100.0|100.0	100.0|93.32	100.0|93.32	98.66
TSPAN11	68.33|81.03	68.33|80.71	68.33|81.03	68.33|78.54	100.0|100.0	100.0|100.0	92.89|90.04	100.0|100.0	92.13|89.66	92.89|90.04	87.11
GPR1	100.0|100.0	100.0|99.72	100.0|100.0	100.0|100.0	100.0|99.72	100.0|100.0	100.0|100.0	99.72|100.0	99.72|100.0	100.0|100.0	99.94
TEX33	74.31|91.35	74.31|89.34	75.23|92.48	74.31|89.34	100.0|99.63	100.0|100.0	100.0|99.63	100.0|100.0	100.0|100.0	100.0|100.0	93
SETD4	86.08|98.87	90.78|83.42	86.27|100.0	86.08|99.77	100.0|80.0	98.87|100.0	99.1|100.0	79.1|100.0	79.28|100.0	100.0|99.77	93.37
NSMCE2	100.0|100.0	100.0|100.0	100.0|100.0	33.96|100.0	100.0|100.0	100.0|100.0	32.73|100.0	100.0|100.0	32.73|100.0	32.97|100.0	86.62
SPON1	100.0|100.0	100.0|100.0	100.0|100.0	71.62|87.05	100.0|100.0	100.0|100.0	71.62|87.05	100.0|100.0	71.62|87.05	71.62|87.05	91.73
C8H11orf42	89.19|99.1	89.19|99.1	89.19|99.1	89.19|98.8	100.0|100.0	100.0|100.0	100.0|100.0	100.0|100.0	100.0|100.0	100.0|100.0	97.64
SLC29A2	100.0|100.0	100.0|100.0	100.0|100.0	100.0|82.01	100.0|100.0	100.0|100.0	100.0|82.37	100.0|100.0	100.0|82.01	100.0|82.37	96.44
MEX3A	94.1|100.0	94.1|96.14	94.58|77.12	66.27|92.43	100.0|96.63	100.0|77.5	70.6|92.43	98.55|78.65	67.71|92.43	54.42|93.09	86.84
HERC6	100.0|100.0	100.0|100.0	99.9|100.0	100.0|100.0	100.0|100.0	100.0|100.0	100.0|100.0	100.0|100.0	100.0|100.0	100.0|99.9	99.99
ARG1	100.0|100.0	68.94|96.52	100.0|100.0	100.0|100.0	68.94|96.52	100.0|100.0	100.0|100.0	96.52|68.73	96.52|68.94	100.0|100.0	93.08
CRYBA2	97.06|86.09	96.57|100.0	96.57|100.0	96.57|100.0	85.65|100.0	85.65|100.0	85.65|100.0	100.0|100.0	100.0|100.0	100.0|100.0	96.49
PHYKPL	77.19|100.0	73.76|95.56	77.02|95.94	74.79|89.71	95.56|95.56	99.78|95.94	96.89|89.71	95.11|91.45	98.0|90.74	92.95|89.51	90.76
RFX6	100.0|100.0	100.0|100.0	100.0|100.0	100.0|99.89	100.0|100.0	100.0|100.0	99.89|99.89	100.0|100.0	99.89|99.89	100.0|99.89	99.97
GGT5	95.09|97.94	100.0|100.0	100.0|100.0	84.0|90.06	99.06|91.68	97.94|91.27	88.95|92.59	100.0|100.0	79.03|88.89	79.76|89.08	93.27
LCN6	73.73|96.13	27.12|58.18	74.15|96.69	82.2|76.08	35.36|58.18	98.34|98.34	96.13|68.24	58.18|35.36	58.18|25.1	96.69|68.63	69.05
ABRAXAS2	100.0|100.0	100.0|97.88	100.0|97.88	100.0|69.98	100.0|98.58	100.0|98.58	100.0|70.49	100.0|100.0	100.0|71.5	100.0|71.5	93.82
ATP4B	100.0|100.0	100.0|100.0	100.0|100.0	100.0|100.0	100.0|100.0	100.0|99.32	100.0|100.0	100.0|100.0	100.0|100.0	100.0|100.0	99.97
NUCKS1	16.53|16.87	16.53|16.87	16.53|17.52	20.56|21.34	18.93|18.93	18.93|19.66	16.87|17.15	18.93|19.66	16.87|17.15	17.52|17.15	18.03
DOK2	100.0|100.0	100.0|100.0	100.0|100.0	100.0|100.0	100.0|100.0	100.0|100.0	100.0|100.0	100.0|100.0	100.0|100.0	99.27|100.0	99.96
TOP3A	100.0|99.9	100.0|100.0	100.0|100.0	94.54|100.0	100.0|100.0	100.0|100.0	94.16|100.0	100.0|100.0	94.16|100.0	96.31|100.0	98.95
ARSI	100.0|100.0	100.0|100.0	99.83|100.0	93.39|94.88	100.0|100.0	99.83|100.0	93.04|94.52	99.83|100.0	93.04|94.52	93.54|94.7	97.56
MRPS12	100.0|100.0	100.0|100.0	100.0|100.0	100.0|100.0	100.0|100.0	100.0|100.0	100.0|100.0	100.0|100.0	100.0|100.0	100.0|100.0	100
CLEC2L	61.17|71.59	83.98|93.01	83.98|81.99	83.98|84.39	100.0|100.0	100.0|84.36	100.0|90.73	96.24|84.83	100.0|90.73	84.83|87.32	88.16
JAML	90.14|91.0	50.0|100.0	87.32|98.15	100.0|89.68	50.47|100.0	88.39|98.42	91.71|81.47	95.77|53.83	100.0|45.47	96.57|77.05	84.27
VMP1	100.0|100.0	100.0|100.0	100.0|100.0	58.62|95.97	100.0|100.0	100.0|100.0	58.62|95.97	100.0|100.0	58.62|95.97	58.62|95.97	90.92
ACAP1	100.0|100.0	100.0|100.0	100.0|100.0	97.24|95.92	100.0|100.0	100.0|100.0	95.27|95.92	100.0|100.0	95.27|95.92	95.27|95.92	98.34
LOC100474992	100.0|100.0	100.0|100.0	85.12|79.23	100.0|100.0	100.0|100.0	84.3|78.46	100.0|100.0	76.69|78.46	100.0|100.0	78.46|84.3	92.25
NOCT	80.75|100.0	83.19|87.04	81.19|85.55	83.41|87.47	100.0|84.72	99.73|84.85	100.0|84.69	98.61|99.3	100.0|100.0	99.3|98.84	91.93
LOC100473137	91.53|100.0	83.7|80.15	93.87|95.49	68.97|100.0	87.61|76.78	100.0|94.03	75.36|100.0	80.9|85.94	56.8|86.01	70.82|100.0	86.4
CCDC175	100.0|100.0	97.6|89.35	97.35|93.67	87.48|89.29	96.74|89.35	97.49|94.65	86.72|89.29	89.35|93.92	80.67|89.94	84.18|89.29	91.82
ZNHIT2	100.0|100.0	100.0|100.0	100.0|100.0	99.75|100.0	100.0|100.0	100.0|100.0	99.75|100.0	100.0|100.0	99.75|100.0	99.75|100.0	99.95
DENND11	83.65|84.67	82.21|90.24	82.21|75.16	82.21|90.0	90.75|98.42	99.76|90.11	90.75|98.16	96.83|80.66	97.63|97.37	80.66|96.58	89.4
TOX	100.0|100.0	100.0|100.0	100.0|100.0	73.95|100.0	100.0|100.0	100.0|100.0	73.95|100.0	100.0|100.0	73.95|100.0	73.95|100.0	94.79
KMT5C	82.83|100.0	82.83|100.0	83.9|100.0	56.17|78.3	100.0|100.0	100.0|100.0	63.18|72.32	100.0|100.0	63.34|72.82	62.39|72.82	84.55
GANAB	100.0|100.0	100.0|100.0	100.0|100.0	100.0|100.0	100.0|100.0	100.0|100.0	100.0|100.0	100.0|100.0	100.0|100.0	100.0|100.0	100
CCHCR1	81.31|87.3	88.7|95.89	88.07|96.19	87.75|95.85	87.41|88.01	87.19|88.7	87.64|89.16	99.66|100.0	99.89|100.0	99.65|99.65	92.4
MRTFA	100.0|95.54	100.0|95.54	100.0|100.0	97.27|100.0	96.38|96.47	96.56|100.0	92.76|100.0	96.56|100.0	92.75|100.0	97.96|100.0	97.89
CDKL3	100.0|100.0	100.0|100.0	97.39|97.87	41.92|100.0	100.0|100.0	96.97|94.59	39.66|100.0	98.52|98.03	38.88|100.0	38.69|100.0	87.13
LRRK2	100.0|100.0	100.0|100.0	100.0|100.0	75.39|96.65	100.0|100.0	100.0|100.0	76.26|97.77	100.0|100.0	74.74|96.09	76.3|97.82	94.55
MRPL37	44.86|95.83	53.06|96.45	52.41|95.27	51.76|99.75	100.0|85.11	99.72|84.87	93.06|83.96	100.0|100.0	94.09|99.75	94.09|99.75	86.19
CROT	96.78|98.05	93.57|94.48	100.0|100.0	100.0|100.0	93.16|92.86	96.42|96.73	96.42|96.73	92.86|93.46	92.86|93.46	100.0|100.0	96.39
VASH2	94.93|97.97	100.0|98.24	98.03|98.03	89.58|81.54	100.0|97.23	100.0|96.9	89.24|78.72	100.0|100.0	98.99|100.0	89.58|81.54	94.53
CR2	100.0|90.77	100.0|90.77	100.0|94.96	100.0|90.89	100.0|100.0	100.0|100.0	100.0|100.0	100.0|100.0	100.0|100.0	100.0|100.0	98.37
FKBP11	87.25|89.0	88.24|90.0	88.24|89.55	87.25|88.56	100.0|100.0	100.0|100.0	91.5|91.04	100.0|100.0	91.5|91.04	91.04|91.04	92.76
SLC7A9	84.81|95.71	41.77|46.86	84.81|96.3	84.81|95.71	51.43|51.12	100.0|100.0	100.0|100.0	51.12|51.75	51.12|51.43	100.0|100.0	76.94
BTAF1	99.09|99.68	99.09|100.0	99.09|100.0	99.09|100.0	99.68|100.0	99.68|100.0	99.68|100.0	100.0|100.0	100.0|100.0	100.0|100.0	99.75
RSPO2	74.73|85.19	74.73|85.19	74.73|85.19	68.95|95.02	100.0|100.0	100.0|100.0	72.02|87.06	100.0|100.0	72.02|87.06	72.02|87.06	86.05
CA6	99.38|99.69	100.0|100.0	93.75|94.64	99.06|98.14	99.69|99.38	100.0|100.0	98.75|97.52	99.38|100.0	100.0|99.07	99.68|97.83	98.8
MAPKAPK3	100.0|100.0	100.0|100.0	100.0|100.0	92.91|95.68	100.0|100.0	100.0|100.0	91.93|95.41	100.0|100.0	91.93|95.41	91.67|95.14	97.5
STRADA	96.75|88.54	98.14|88.68	100.0|100.0	100.0|100.0	100.0|100.0	88.54|96.75	88.54|96.75	88.68|98.14	88.68|98.14	100.0|100.0	95.82
CNPPD1	82.04|100.0	82.04|100.0	62.67|77.15	82.04|100.0	100.0|100.0	100.0|100.0	100.0|100.0	100.0|100.0	100.0|100.0	100.0|100.0	94.3
SPRY2	100.0|100.0	100.0|100.0	100.0|100.0	100.0|100.0	100.0|100.0	100.0|100.0	100.0|100.0	100.0|100.0	100.0|100.0	100.0|100.0	100
CTTN	5.76|8.6	5.62|7.79	5.76|7.88	5.76|7.88	100.0|100.0	20.0|18.32	100.0|100.0	100.0|99.82	100.0|100.0	100.0|100.0	54.66
XIAP	100.0|100.0	100.0|100.0	100.0|100.0	100.0|100.0	100.0|100.0	100.0|100.0	100.0|100.0	100.0|100.0	100.0|100.0	100.0|100.0	100
NSUN2	85.64|92.78	89.87|74.42	93.97|96.83	88.97|97.75	92.78|70.91	92.36|87.85	90.42|91.69	74.31|92.47	73.67|97.75	85.34|90.99	88.04
CTU2	100.0|100.0	100.0|100.0	87.18|87.35	100.0|97.62	98.52|100.0	95.94|100.0	100.0|100.0	97.74|100.0	100.0|98.17	97.86|92.12	97.63
SLC27A4	100.0|99.08	100.0|100.0	100.0|100.0	100.0|90.21	98.77|100.0	98.77|100.0	99.08|90.21	100.0|100.0	100.0|89.93	100.0|89.93	97.8
RASSF5	52.53|85.71	52.07|85.28	86.64|91.04	40.78|64.84	100.0|100.0	85.71|55.21	66.54|64.84	85.28|54.72	66.79|64.84	43.34|65.57	70.59
CCNO	100.0|100.0	100.0|100.0	98.58|98.58	100.0|100.0	100.0|100.0	98.58|98.58	100.0|100.0	98.58|98.58	100.0|100.0	98.58|98.58	99.43
IL6ST	96.23|100.0	96.23|100.0	96.02|99.89	94.97|100.0	100.0|100.0	99.56|99.67	98.69|100.0	100.0|100.0	98.69|100.0	98.04|99.23	98.86
ARHGAP29	100.0|100.0	100.0|100.0	100.0|100.0	100.0|100.0	100.0|100.0	100.0|100.0	100.0|100.0	100.0|100.0	100.0|100.0	100.0|100.0	100
PTCH1	95.58|99.93	89.79|100.0	95.65|96.65	95.65|97.54	93.87|100.0	99.93|96.58	99.93|97.47	100.0|90.73	100.0|91.56	99.58|100.0	97.02
CCNK	72.82|55.09	73.88|66.99	73.88|48.11	73.88|54.58	80.64|96.65	95.21|81.96	80.64|78.75	66.99|48.11	96.65|78.75	48.11|54.58	71.31
FAM219B	53.24|91.41	53.24|91.41	53.24|91.88	53.24|91.88	100.0|100.0	100.0|100.0	100.0|100.0	100.0|100.0	100.0|100.0	100.0|100.0	88.98
TNFSF15	89.47|100.0	89.47|100.0	95.79|100.0	89.47|100.0	100.0|100.0	100.0|94.44	100.0|100.0	100.0|94.44	100.0|100.0	94.44|100.0	97.38
MAP3K9	88.41|100.0	94.45|88.02	94.74|88.45	82.28|98.48	100.0|82.4	100.0|82.82	93.06|98.48	100.0|100.0	76.68|98.48	77.09|98.83	92.13
SPATA46	99.19|94.59	99.19|93.51	100.0|100.0	100.0|84.01	96.53|95.42	94.98|100.0	99.61|87.76	93.89|100.0	89.69|79.93	100.0|81.97	94.51
PSPC1	100.0|100.0	100.0|100.0	100.0|100.0	38.22|89.77	100.0|100.0	100.0|100.0	37.81|91.63	100.0|100.0	25.06|46.98	37.67|91.63	82.94
SLITRK3	100.0|100.0	100.0|100.0	100.0|99.9	98.77|100.0	100.0|100.0	100.0|100.0	98.88|100.0	100.0|99.9	98.77|100.0	98.67|100.0	99.74
NUBPL	86.92|100.0	92.92|100.0	85.56|98.43	31.34|92.0	100.0|100.0	98.43|98.43	36.36|92.8	98.53|100.0	40.47|100.0	36.36|92.8	84.07
CRNN	92.5|100.0	100.0|100.0	93.21|100.0	92.79|100.0	100.0|100.0	100.0|100.0	100.0|100.0	15.82|21.54	100.0|100.0	100.0|100.0	90.79
FAM149B1	91.61|91.61	91.61|91.14	100.0|96.86	48.63|84.02	100.0|99.49	93.15|89.77	55.14|95.27	92.67|89.77	54.86|95.27	47.19|84.62	84.63
RIOK1	89.46|89.3	88.58|88.58	88.05|88.36	85.76|88.57	88.77|88.93	88.25|88.71	85.61|88.57	87.35|87.65	85.24|88.02	86.42|88.93	87.96
ZNF263	59.5|65.43	59.5|59.5	58.92|59.26	59.5|59.5	65.59|59.65	64.79|59.26	65.43|59.5	58.92|59.26	59.5|59.5	59.26|58.92	60.53
PDGFA	36.17|72.51	36.17|59.53	36.17|72.51	55.79|75.64	84.36|69.26	83.89|83.89	84.36|57.05	73.93|90.05	75.1|61.86	100.0|67.63	68.79
FAM187A	100.0|100.0	100.0|99.76	100.0|99.04	99.76|99.76	99.76|99.76	100.0|99.04	99.76|100.0	100.0|99.28	100.0|100.0	99.28|100.0	99.76
CTNS	81.59|90.21	81.59|90.21	81.59|95.37	81.59|90.21	100.0|100.0	93.3|98.64	100.0|100.0	93.3|98.64	100.0|100.0	98.64|93.3	93.41
TP73	84.2|81.83	91.88|99.53	91.59|99.06	79.13|86.12	81.69|91.05	81.41|90.6	65.92|73.82	99.53|99.37	82.42|82.81	82.92|83.44	86.42
ALKBH1	100.0|100.0	100.0|100.0	100.0|100.0	100.0|100.0	100.0|100.0	100.0|100.0	100.0|100.0	100.0|100.0	100.0|100.0	100.0|100.0	100
CCDC157	100.0|99.86	100.0|99.86	100.0|100.0	100.0|100.0	100.0|100.0	99.86|100.0	100.0|100.0	99.86|100.0	100.0|100.0	100.0|100.0	99.97
HEG1	100.0|100.0	100.0|100.0	100.0|100.0	94.2|100.0	100.0|99.56	100.0|97.16	97.97|100.0	100.0|100.0	92.47|100.0	92.37|100.0	98.69
ZNF839	100.0|100.0	100.0|91.89	100.0|96.31	93.07|100.0	100.0|89.09	100.0|89.58	91.88|99.72	100.0|100.0	83.89|100.0	83.82|100.0	95.96
MGRN1	91.16|96.93	97.45|99.31	97.62|100.0	91.16|86.59	97.65|93.59	98.01|97.48	100.0|89.34	100.0|100.0	93.59|87.24	97.84|87.88	95.14
FGF20	93.72|91.94	93.72|91.94	93.72|91.94	93.72|91.94	100.0|100.0	100.0|100.0	100.0|100.0	100.0|100.0	100.0|100.0	100.0|100.0	97.13
FAM120B	80.05|100.0	80.05|100.0	81.36|100.0	2.35|5.77	100.0|98.87	96.45|100.0	40.88|71.37	98.31|100.0	37.97|71.79	43.26|72.65	74.06
FLT1	100.0|100.0	100.0|100.0	100.0|100.0	89.83|100.0	100.0|100.0	100.0|100.0	89.76|100.0	100.0|100.0	89.77|100.0	90.02|100.0	97.97
C2CD3	100.0|100.0	100.0|100.0	100.0|100.0	99.52|99.69	100.0|100.0	100.0|100.0	97.94|99.61	100.0|100.0	97.53|99.65	98.28|99.48	99.59
ARL6IP4	44.59|35.27	44.59|43.1	44.59|44.98	44.59|30.84	35.96|43.93	35.96|45.85	100.0|88.32	43.93|45.85	43.93|31.44	45.85|31.44	46.25
PTPN7	75.86|88.95	75.86|91.67	75.86|91.92	75.86|91.67	97.04|100.0	97.04|100.0	97.04|100.0	100.0|100.0	100.0|100.0	100.0|100.0	92.94
OCRL	100.0|100.0	100.0|100.0	100.0|99.89	100.0|100.0	100.0|100.0	100.0|100.0	100.0|100.0	100.0|100.0	100.0|100.0	100.0|100.0	99.99
DENND4A	100.0|100.0	100.0|100.0	100.0|100.0	72.87|100.0	100.0|100.0	100.0|100.0	72.6|98.26	100.0|100.0	73.23|100.0	72.45|97.9	94.37
WDR4	92.61|98.69	88.67|80.9	100.0|90.13	92.86|96.42	86.88|74.38	100.0|84.21	99.74|97.19	85.62|83.55	74.38|84.65	86.62|100.0	89.88
LMCD1	62.02|88.15	62.02|88.15	62.4|88.22	62.02|79.01	100.0|100.0	100.0|100.0	100.0|89.63	100.0|100.0	100.0|89.63	100.0|90.12	88.07
PARP9	96.21|99.6	80.68|100.0	80.39|99.76	78.54|95.06	83.42|100.0	83.12|99.64	83.12|97.18	95.54|95.54	99.76|97.3	97.95|95.53	92.92
CD19	91.65|100.0	91.82|100.0	92.31|100.0	91.98|100.0	100.0|100.0	100.0|100.0	100.0|100.0	100.0|100.0	100.0|100.0	100.0|100.0	98.39
LRRC17	94.6|100.0	95.25|100.0	95.68|100.0	95.25|100.0	100.0|100.0	100.0|100.0	100.0|100.0	100.0|100.0	100.0|100.0	100.0|100.0	99.04
IL4R	95.93|99.5	97.13|100.0	92.57|95.43	87.19|91.57	100.0|100.0	98.51|97.9	100.0|100.0	98.27|98.4	100.0|100.0	100.0|100.0	97.62
USP33	82.02|100.0	100.0|100.0	100.0|100.0	100.0|97.12	100.0|82.02	100.0|82.29	100.0|79.66	100.0|100.0	100.0|97.12	100.0|97.12	95.87
FAM171B	99.6|100.0	99.06|90.13	100.0|91.11	99.46|100.0	100.0|90.26	100.0|90.74	100.0|100.0	100.0|100.0	90.13|99.6	90.62|100.0	97.04
VGLL4	100.0|100.0	100.0|100.0	100.0|100.0	60.14|100.0	100.0|100.0	100.0|100.0	60.14|100.0	100.0|100.0	60.14|100.0	62.02|100.0	92.12
PPM1E	100.0|100.0	73.91|100.0	100.0|100.0	79.6|97.56	73.58|100.0	100.0|100.0	79.26|97.4	100.0|74.5	100.0|90.42	80.24|97.56	92.2
MID1IP1	99.45|99.45	99.45|99.45	99.45|100.0	99.45|99.45	100.0|100.0	100.0|100.0	100.0|100.0	100.0|100.0	100.0|100.0	100.0|100.0	99.81
LOC100477217	87.5|87.68	54.44|90.3	100.0|93.42	100.0|100.0	42.63|70.57	87.88|81.77	87.68|87.5	89.97|50.56	90.64|54.64	93.42|100.0	82.53
GAL3ST1	100.0|100.0	100.0|82.33	100.0|100.0	100.0|100.0	100.0|82.33	100.0|100.0	100.0|100.0	82.33|100.0	82.52|100.0	100.0|100.0	96.48
IDUA	96.89|99.31	80.65|100.0	98.24|100.0	22.33|99.4	70.87|99.8	87.66|98.29	22.88|99.4	99.8|79.47	25.78|79.52	25.66|99.4	79.27
UBAP1L	88.95|99.7	100.0|100.0	100.0|98.7	100.0|100.0	100.0|88.03	97.89|84.38	100.0|86.65	100.0|100.0	100.0|100.0	97.92|98.43	97.03
DLST	64.88|92.97	64.88|93.17	64.88|93.17	64.88|99.76	100.0|100.0	100.0|100.0	93.41|100.0	100.0|100.0	93.61|100.0	93.61|100.0	90.96
RAD54B	88.82|100.0	100.0|100.0	100.0|100.0	89.36|73.89	100.0|86.63	100.0|91.31	99.88|73.25	100.0|100.0	86.52|73.35	91.65|73.62	91.41
USP25	98.75|98.4	100.0|100.0	100.0|100.0	38.82|93.56	98.4|98.75	98.58|98.76	38.69|93.56	100.0|100.0	38.82|93.56	38.93|93.99	86.08
KLK4	77.9|81.89	76.03|79.92	77.9|81.57	77.9|81.89	100.0|100.0	99.21|98.82	100.0|100.0	99.21|98.82	100.0|100.0	98.82|99.21	91.45
FAM110B	100.0|100.0	100.0|100.0	100.0|100.0	97.33|100.0	100.0|100.0	100.0|100.0	97.3|100.0	100.0|100.0	97.3|100.0	97.54|100.0	99.47
ABRACL	46.33|100.0	45.76|100.0	45.76|100.0	83.62|73.63	97.56|98.77	97.56|98.77	100.0|40.8	100.0|100.0	100.0|40.3	100.0|40.3	80.46
ERO1A	100.0|100.0	100.0|100.0	100.0|100.0	100.0|100.0	100.0|100.0	100.0|100.0	100.0|100.0	100.0|100.0	100.0|100.0	100.0|100.0	100
USP49	100.0|99.56	100.0|100.0	99.85|99.27	100.0|99.85	100.0|100.0	100.0|100.0	100.0|100.0	100.0|100.0	100.0|100.0	100.0|100.0	99.93
MOV10	91.3|98.53	86.85|87.73	91.66|93.87	90.93|100.0	93.74|87.73	99.8|94.71	98.14|100.0	87.82|89.04	87.73|95.51	93.22|100.0	93.42
EIF2B5	100.0|100.0	100.0|100.0	93.83|95.4	100.0|100.0	100.0|100.0	93.89|94.28	100.0|100.0	93.89|94.28	100.0|100.0	95.4|94.21	97.76
TRIM59	99.26|99.5	99.26|99.5	99.26|99.5	99.26|99.75	99.75|99.75	99.75|99.75	99.75|100.0	100.0|100.0	100.0|100.0	100.0|100.0	99.7
HRH4	98.23|97.73	100.0|100.0	100.0|100.0	100.0|100.0	99.24|98.99	98.49|100.0	98.49|98.74	100.0|100.0	99.25|99.75	100.0|99.75	99.43
MCPH1	96.36|91.06	97.21|93.9	96.0|96.23	73.42|95.73	98.51|100.0	97.25|100.0	73.05|100.0	100.0|100.0	75.5|100.0	76.64|99.68	93.03
POLR1A	100.0|100.0	100.0|100.0	100.0|100.0	68.78|94.48	100.0|100.0	100.0|100.0	68.74|94.48	100.0|100.0	68.74|94.48	68.78|94.48	92.65
ENTPD1	100.0|100.0	100.0|100.0	99.61|94.06	99.41|96.93	100.0|100.0	99.61|94.25	99.22|96.93	99.61|94.25	99.22|96.93	94.06|97.13	98.06
CUL7	100.0|100.0	100.0|100.0	100.0|100.0	100.0|100.0	100.0|100.0	100.0|100.0	100.0|100.0	100.0|100.0	100.0|100.0	100.0|100.0	100
IL13RA1	97.66|97.66	96.49|98.56	99.77|100.0	93.21|95.67	93.68|95.69	98.83|99.53	95.32|97.84	94.74|93.4	95.22|95.67	93.63|95.43	96.4
METTL26	48.77|77.94	50.31|78.47	48.77|77.94	49.69|95.29	100.0|100.0	100.0|100.0	68.14|81.76	100.0|100.0	66.03|81.18	68.14|81.76	78.71
UBXN7	97.55|91.91	95.09|85.79	100.0|100.0	97.55|84.57	89.6|85.79	91.91|97.55	100.0|92.02	85.79|95.09	85.79|82.45	97.55|84.57	92.03
RAB3GAP1	93.72|94.01	93.02|93.97	94.13|94.13	93.72|94.01	100.0|100.0	100.0|100.0	100.0|100.0	100.0|100.0	100.0|100.0	100.0|100.0	97.54
RIPOR3	78.18|88.89	81.13|97.77	78.18|98.93	63.86|100.0	91.48|96.95	90.8|100.0	72.41|100.0	96.65|100.0	76.95|100.0	80.92|100.0	89.66
TMEM267	85.32|100.0	85.32|100.0	91.67|97.06	85.32|100.0	100.0|100.0	100.0|90.34	100.0|100.0	100.0|90.34	100.0|100.0	90.34|100.0	95.79
TERF1	100.0|100.0	100.0|100.0	100.0|100.0	100.0|100.0	100.0|100.0	98.63|100.0	100.0|100.0	99.03|96.91	100.0|100.0	99.29|94.57	99.42
LOC105235296	99.21|100.0	22.43|98.84	86.28|85.16	99.21|94.24	22.91|98.84	87.87|84.9	100.0|93.98	98.84|22.14	98.84|21.3	85.16|81.95	79.11
DDB1	100.0|100.0	100.0|100.0	100.0|100.0	100.0|88.89	100.0|100.0	100.0|100.0	100.0|88.89	100.0|100.0	100.0|88.89	100.0|88.89	97.78
PHF13	44.82|84.97	44.82|68.37	45.12|100.0	25.15|100.0	94.8|76.28	84.97|99.32	47.69|100.0	68.37|99.32	38.37|100.0	55.07|98.79	73.81
PRKRIP1	59.68|55.22	56.45|41.67	63.98|63.98	54.84|85.71	52.24|41.67	55.22|59.68	46.77|78.99	41.67|56.45	34.92|73.95	54.84|85.71	58.18
NOL8	100.0|100.0	100.0|100.0	100.0|100.0	100.0|100.0	100.0|100.0	100.0|99.48	100.0|100.0	100.0|100.0	100.0|100.0	99.14|100.0	99.93
YIPF2	66.44|94.86	67.79|96.78	67.79|96.47	68.24|96.5	100.0|100.0	100.0|99.68	100.0|99.04	100.0|99.68	100.0|99.36	98.08|97.45	92.41
PPM1D	74.88|100.0	100.0|100.0	100.0|100.0	100.0|100.0	100.0|74.88	100.0|75.75	100.0|75.88	100.0|100.0	100.0|100.0	100.0|100.0	95.07
RAMP3	92.09|85.91	92.09|85.91	91.37|86.39	83.45|100.0	100.0|100.0	86.58|87.76	77.85|100.0	91.95|93.2	77.85|100.0	78.91|100.0	90.57
PTGR1	82.35|89.36	82.35|89.36	82.35|89.36	82.35|89.36	100.0|100.0	100.0|100.0	100.0|100.0	100.0|100.0	100.0|100.0	100.0|100.0	94.34
RNF217	100.0|37.01	100.0|16.02	100.0|20.19	100.0|40.94	100.0|43.3	100.0|54.56	88.97|98.43	82.28|100.0	38.52|98.43	48.54|98.43	73.28
BBS2	99.44|98.61	100.0|98.66	99.44|98.61	99.44|98.61	100.0|100.0	100.0|100.0	100.0|100.0	100.0|100.0	100.0|100.0	100.0|100.0	99.64
TSC22D1	82.5|92.97	91.53|94.16	92.64|92.39	82.31|96.82	91.5|83.52	94.23|83.38	90.98|94.96	95.21|92.29	90.71|100.0	82.92|97.81	91.14
IFT80	100.0|83.55	100.0|82.37	100.0|82.37	100.0|82.37	90.21|88.93	90.21|88.93	90.21|88.93	100.0|100.0	100.0|100.0	100.0|100.0	93.4
TMEM144	89.66|92.24	89.66|92.24	89.66|92.24	89.66|92.24	100.0|100.0	100.0|100.0	100.0|100.0	100.0|100.0	100.0|100.0	100.0|100.0	96.38
ZFYVE19	100.0|100.0	100.0|100.0	100.0|100.0	100.0|85.81	100.0|100.0	100.0|100.0	100.0|85.81	97.76|100.0	100.0|86.45	100.0|85.81	97.08
JAKMIP1	91.88|98.07	91.88|98.07	91.88|98.07	92.33|97.15	100.0|100.0	100.0|100.0	98.92|97.51	100.0|100.0	98.92|97.51	98.92|97.51	97.43
HEXIM1	82.53|52.65	82.53|52.65	82.1|52.81	79.91|57.19	100.0|100.0	100.0|100.0	100.0|100.0	100.0|100.0	100.0|100.0	100.0|100.0	87.12
SLC5A9	89.57|92.34	89.71|93.18	90.71|92.7	92.57|93.37	99.26|100.0	100.0|100.0	100.0|100.0	100.0|99.71	100.0|100.0	100.0|100.0	96.66
ERP44	100.0|86.7	100.0|86.7	100.0|86.7	92.26|100.0	100.0|100.0	100.0|100.0	71.43|100.0	100.0|100.0	71.43|100.0	71.43|100.0	93.33
FAM219A	100.0|87.7	100.0|90.81	92.07|89.88	88.41|96.03	96.26|97.3	96.26|100.0	81.28|100.0	100.0|100.0	80.54|98.68	78.57|87.42	93.06
LOC117795426	100.0|100.0	100.0|46.28	97.7|97.7	96.55|63.64	100.0|46.28	97.7|97.7	96.55|63.64	45.21|97.7	44.68|63.64	94.25|62.12	80.57
TAF1A	100.0|100.0	100.0|100.0	100.0|99.34	100.0|100.0	100.0|100.0	100.0|99.34	100.0|100.0	100.0|99.34	100.0|100.0	99.34|100.0	99.87
IFT88	81.21|94.5	70.42|92.81	100.0|100.0	88.73|98.26	75.04|84.98	89.84|77.21	92.24|87.79	92.81|70.42	83.23|69.93	86.67|95.97	86.6
ABHD6	100.0|100.0	83.09|68.29	99.11|99.4	99.7|99.7	83.09|68.29	99.11|99.4	99.7|99.7	68.29|83.33	68.29|83.09	99.4|99.11	90
OSM	92.71|96.22	95.55|99.16	85.43|80.23	85.83|99.07	97.06|97.06	86.55|78.33	89.92|100.0	88.24|79.85	89.92|100.0	70.34|86.45	89.9
SUPT20H	90.69|96.05	95.34|94.03	93.83|100.0	93.95|100.0	97.53|90.82	96.05|99.36	95.93|99.87	93.92|100.0	100.0|100.0	92.6|93.2	96.16
MSC	100.0|100.0	100.0|100.0	100.0|100.0	100.0|100.0	100.0|100.0	100.0|100.0	100.0|100.0	100.0|100.0	100.0|100.0	100.0|100.0	100
GHRH	98.11|100.0	100.0|100.0	89.62|92.23	98.11|100.0	100.0|98.13	91.35|92.23	100.0|100.0	88.79|92.23	98.13|100.0	92.23|91.35	96.13
TCTN2	100.0|100.0	100.0|100.0	100.0|99.14	95.24|100.0	100.0|100.0	100.0|99.28	95.1|100.0	99.42|98.86	95.4|100.0	94.42|100.0	98.84
SYNJ2	79.95|93.77	100.0|96.46	92.79|95.74	76.15|91.14	99.39|81.73	100.0|88.24	98.69|100.0	100.0|100.0	81.16|100.0	83.37|96.71	92.76
INPP5B	98.27|92.82	100.0|75.45	99.6|75.23	93.87|77.36	100.0|87.93	100.0|87.61	100.0|87.25	99.7|99.8	100.0|100.0	99.7|100.0	93.73
SGCZ	89.1|100.0	100.0|100.0	100.0|100.0	41.67|89.04	100.0|89.1	100.0|89.39	48.2|91.78	100.0|100.0	41.67|89.04	41.8|89.04	84.99
HSDL1	100.0|100.0	96.67|85.07	100.0|100.0	100.0|100.0	96.67|85.07	100.0|100.0	100.0|100.0	85.07|96.67	85.07|100.0	100.0|100.0	96.51
DHRS7B	99.38|99.38	97.85|79.3	97.85|98.45	97.85|88.58	98.15|79.55	100.0|100.0	98.15|88.86	79.3|98.45	89.53|100.0	98.76|88.86	93.91
CD34	93.59|94.81	97.44|98.96	91.54|93.46	54.62|60.17	93.77|94.01	92.21|92.93	91.95|100.0	100.0|100.0	55.47|60.17	56.28|60.73	84.11
DBT	100.0|100.0	100.0|100.0	100.0|100.0	100.0|100.0	100.0|100.0	100.0|100.0	100.0|100.0	100.0|100.0	100.0|100.0	100.0|100.0	100
FOXN2	100.0|100.0	100.0|100.0	100.0|100.0	100.0|100.0	100.0|100.0	100.0|100.0	100.0|100.0	100.0|100.0	100.0|100.0	100.0|100.0	100
IL1F10	85.88|100.0	90.96|85.64	85.88|100.0	85.88|100.0	100.0|80.85	100.0|100.0	100.0|100.0	80.85|100.0	80.85|100.0	100.0|100.0	93.84
PIP4K2B	76.19|92.56	79.82|100.0	94.33|100.0	82.31|93.8	92.56|95.45	92.56|80.77	92.56|86.82	100.0|84.62	100.0|90.96	87.26|93.8	90.82
NUP85	100.0|100.0	100.0|100.0	100.0|100.0	100.0|100.0	100.0|100.0	100.0|100.0	100.0|100.0	100.0|100.0	100.0|100.0	100.0|100.0	100
GOLGA1	100.0|100.0	100.0|100.0	100.0|100.0	100.0|100.0	100.0|100.0	100.0|100.0	100.0|100.0	100.0|100.0	100.0|100.0	100.0|100.0	100
NTF3	74.58|97.78	76.27|100.0	76.55|100.0	72.6|100.0	97.78|97.78	98.15|97.79	95.19|100.0	100.0|100.0	95.19|100.0	95.2|100.0	93.74
LMAN2	89.3|89.04	89.3|89.04	89.58|88.83	89.3|89.04	89.04|89.04	89.04|88.55	89.04|89.04	89.04|88.55	100.0|100.0	88.55|89.04	90.12
RHEB	59.05|76.54	58.62|32.08	66.38|83.7	59.05|76.54	92.74|39.15	93.3|90.76	100.0|100.0	39.15|90.22	40.57|96.09	90.76|93.3	73.9
TEKT3	100.0|100.0	100.0|100.0	100.0|100.0	100.0|100.0	100.0|100.0	100.0|100.0	100.0|100.0	100.0|100.0	100.0|100.0	100.0|100.0	100
MAPK15	81.38|100.0	88.55|86.52	81.66|100.0	83.31|100.0	100.0|83.29	100.0|100.0	100.0|100.0	82.21|100.0	85.04|100.0	100.0|100.0	93.6
ARHGAP23	100.0|100.0	99.56|99.3	99.91|76.88	97.21|82.02	100.0|100.0	100.0|92.14	100.0|100.0	100.0|79.37	99.74|84.38	84.48|92.63	94.38
SP9	79.61|91.45	100.0|63.71	100.0|63.84	86.73|100.0	91.45|50.72	91.45|50.83	91.45|91.79	92.37|92.56	55.26|100.0	55.37|100.0	82.43
TMEM41A	100.0|89.49	100.0|89.49	99.62|99.62	100.0|70.4	100.0|100.0	89.15|99.62	93.22|73.33	89.15|99.62	91.53|72.0	99.62|70.13	91.3
SLC16A13	100.0|100.0	100.0|100.0	99.58|100.0	94.09|100.0	100.0|100.0	100.0|100.0	93.41|99.5	100.0|100.0	93.41|99.5	93.46|100.0	98.65
NADK	64.66|100.0	91.46|81.21	85.24|100.0	84.85|96.26	100.0|55.17	100.0|72.89	100.0|70.48	75.86|100.0	75.34|96.26	99.54|96.26	87.27
RDH5	99.69|99.69	99.69|99.69	99.69|99.69	100.0|76.56	100.0|100.0	99.69|99.69	100.0|76.32	99.69|99.69	100.0|76.32	100.0|76.32	95.12
TMEM150C	84.85|99.21	83.84|100.0	83.84|100.0	83.84|100.0	98.03|100.0	98.03|100.0	98.03|100.0	100.0|100.0	100.0|100.0	100.0|100.0	96.48
SERPINE1	89.53|100.0	90.65|100.0	89.53|100.0	89.53|100.0	100.0|100.0	100.0|100.0	100.0|100.0	100.0|100.0	100.0|100.0	100.0|100.0	97.96
ASGR2	87.5|86.05	86.49|69.75	90.54|89.04	89.53|87.17	100.0|84.2	97.34|97.34	98.67|97.7	82.83|100.0	83.11|100.0	100.0|99.67	91.35
HSD17B11	90.79|88.75	90.79|89.9	90.79|92.62	90.79|92.0	96.46|97.72	95.82|100.0	96.46|100.0	97.07|100.0	97.72|100.0	100.0|99.33	95.35
ADM	75.5|100.0	74.3|98.93	71.89|97.28	74.7|98.94	98.4|98.93	95.21|97.28	98.94|98.94	93.05|94.57	100.0|100.0	97.83|95.74	93.02
ZNF483	33.12|98.84	59.74|61.58	47.53|50.27	59.74|63.01	91.09|31.46	89.15|31.59	100.0|35.62	59.57|61.13	58.63|60.0	58.93|58.77	60.49
MYOZ3	98.43|100.0	100.0|100.0	96.46|100.0	83.07|100.0	100.0|100.0	100.0|100.0	86.4|100.0	100.0|100.0	87.32|100.0	86.12|100.0	96.89
NCAPD3	100.0|100.0	100.0|100.0	100.0|100.0	100.0|100.0	100.0|100.0	100.0|100.0	100.0|100.0	100.0|100.0	100.0|100.0	100.0|100.0	100
NUDT17	92.07|99.34	99.7|99.7	95.12|99.68	89.63|99.32	100.0|92.68	100.0|100.0	96.71|99.32	95.43|100.0	90.24|100.0	100.0|100.0	97.45
SERPINF2	100.0|100.0	100.0|100.0	100.0|100.0	100.0|100.0	100.0|100.0	100.0|100.0	100.0|100.0	100.0|100.0	100.0|100.0	100.0|100.0	100
CEP85	100.0|100.0	100.0|100.0	100.0|100.0	99.87|100.0	100.0|100.0	100.0|100.0	99.74|100.0	100.0|100.0	99.75|100.0	99.87|100.0	99.96
IL21	100.0|95.42	100.0|95.42	95.89|86.42	95.89|93.96	100.0|100.0	91.5|86.42	96.08|98.66	91.5|86.42	96.08|98.66	87.04|94.63	94.5
PKNOX1	100.0|100.0	100.0|100.0	100.0|100.0	100.0|100.0	100.0|100.0	100.0|100.0	100.0|100.0	100.0|100.0	100.0|100.0	100.0|100.0	100
RPN1	100.0|100.0	100.0|100.0	100.0|100.0	100.0|100.0	100.0|100.0	100.0|100.0	100.0|100.0	100.0|100.0	100.0|100.0	100.0|100.0	100
PCLO	86.23|91.21	100.0|94.52	100.0|95.17	51.5|96.02	97.37|85.45	97.11|87.37	52.98|93.39	100.0|100.0	47.29|94.97	48.22|94.47	85.66
NECAP1	88.74|94.89	88.74|89.97	88.74|94.55	88.74|75.8	94.53|89.62	100.0|100.0	100.0|79.88	89.97|94.55	89.62|75.51	100.0|80.17	90.2
SREK1	48.56|48.56	48.56|48.41	49.04|50.33	49.04|50.25	48.72|48.57	49.36|50.66	49.36|50.57	49.04|50.49	49.04|50.41	50.66|50.57	49.51
TRPS1	99.84|100.0	99.84|99.15	100.0|100.0	69.03|100.0	100.0|100.0	100.0|99.84	63.46|100.0	99.15|99.84	68.55|100.0	69.03|100.0	93.39
CPPED1	76.04|78.29	100.0|100.0	99.68|100.0	69.01|100.0	78.29|76.04	78.29|76.28	46.38|65.28	99.68|100.0	69.01|100.0	68.59|99.07	84
KCNJ2	100.0|100.0	100.0|100.0	100.0|100.0	95.78|100.0	100.0|100.0	100.0|100.0	95.78|100.0	100.0|100.0	95.78|100.0	95.79|100.0	99.16
CCSAP	50.37|87.66	48.13|74.14	100.0|100.0	50.37|90.0	83.77|74.14	95.45|58.33	94.81|97.33	68.97|47.62	74.14|86.0	57.94|97.33	76.83
SNAP25	100.0|100.0	100.0|100.0	100.0|100.0	100.0|100.0	100.0|100.0	100.0|100.0	100.0|100.0	100.0|100.0	100.0|100.0	100.0|100.0	100
LDLR	88.96|92.29	88.96|91.44	89.08|91.76	88.96|90.08	98.13|97.22	100.0|99.42	100.0|97.72	98.26|98.49	97.22|95.78	100.0|98.52	95.11
TTLL7	100.0|100.0	100.0|100.0	100.0|100.0	100.0|100.0	100.0|100.0	100.0|100.0	100.0|100.0	100.0|100.0	100.0|100.0	100.0|100.0	100
ZIC3	100.0|98.52	100.0|100.0	100.0|100.0	99.57|100.0	98.52|100.0	98.73|100.0	97.89|100.0	100.0|100.0	99.57|100.0	99.57|100.0	99.62
LOC100467027	65.49|70.14	65.49|70.14	65.71|70.21	65.49|85.8	100.0|100.0	100.0|100.0	81.75|100.0	100.0|100.0	81.75|100.0	81.8|100.0	85.19
HOMER1	100.0|100.0	100.0|100.0	99.44|95.14	48.87|94.02	100.0|100.0	99.44|95.14	48.87|94.02	99.44|95.14	48.87|94.02	46.76|94.02	87.66
ADAMTS7	92.48|100.0	100.0|99.69	100.0|99.03	100.0|100.0	100.0|88.85	100.0|89.74	100.0|91.0	100.0|99.46	100.0|100.0	98.85|100.0	97.96
UBE2Z	95.0|81.32	95.0|84.96	95.0|58.71	95.0|84.96	95.72|100.0	100.0|72.19	95.72|100.0	100.0|69.1	100.0|100.0	69.1|100.0	89.59
SPPL2A	99.24|97.93	99.05|95.94	98.86|99.24	95.81|95.27	97.56|95.76	97.56|99.24	94.36|95.08	96.31|99.81	92.8|95.27	99.24|98.3	97.13
PHF14	92.25|91.58	81.88|81.37	93.19|94.58	87.75|93.63	98.65|98.75	98.23|100.0	95.32|100.0	100.0|100.0	94.59|100.0	94.9|99.78	94.82
GCM2	100.0|100.0	100.0|70.47	100.0|100.0	100.0|87.69	100.0|70.75	100.0|100.0	100.0|88.04	69.64|99.21	73.12|90.99	100.0|87.69	91.88
PNOC	100.0|100.0	98.86|86.5	100.0|87.26	100.0|100.0	98.86|86.5	100.0|87.26	100.0|100.0	100.0|100.0	86.5|98.86	87.26|100.0	95.89
SLC35B3	93.6|100.0	93.6|100.0	87.64|96.13	81.46|100.0	100.0|100.0	95.28|97.82	87.03|100.0	93.63|96.13	87.03|100.0	89.35|100.0	94.94
ELFN2	91.81|77.64	91.52|77.49	91.95|77.76	91.67|77.52	100.0|100.0	100.0|100.0	100.0|100.0	100.0|100.0	100.0|100.0	100.0|100.0	93.87
RCN3	100.0|100.0	100.0|100.0	100.0|100.0	100.0|100.0	100.0|100.0	100.0|100.0	100.0|100.0	100.0|100.0	100.0|100.0	100.0|100.0	100
CCDC14	100.0|93.86	100.0|99.0	98.98|93.9	100.0|93.96	94.92|100.0	100.0|100.0	100.0|100.0	100.0|96.68	100.0|95.02	100.0|100.0	98.32
PCYT1B	100.0|100.0	85.91|82.12	100.0|100.0	89.43|100.0	85.91|82.12	100.0|100.0	89.43|100.0	82.12|85.91	72.28|84.55	89.43|100.0	91.46
TAB2	100.0|100.0	100.0|100.0	100.0|100.0	100.0|100.0	100.0|100.0	100.0|100.0	100.0|100.0	100.0|100.0	100.0|100.0	100.0|100.0	100
FMO2	95.23|100.0	93.64|99.07	94.35|99.81	69.96|99.0	98.7|99.44	99.07|99.81	73.47|99.0	100.0|100.0	74.02|99.0	74.02|99.0	93.33
EVX2	100.0|100.0	76.26|100.0	100.0|100.0	73.74|80.5	81.91|100.0	100.0|100.0	90.18|80.05	100.0|76.21	72.24|52.52	73.89|80.5	86.9
DNAJB11	57.55|73.46	57.55|73.46	57.55|73.46	57.33|73.18	100.0|100.0	100.0|100.0	100.0|100.0	100.0|100.0	100.0|100.0	100.0|100.0	86.18
EMID1	100.0|97.99	40.46|35.34	100.0|98.2	100.0|98.69	41.61|37.35	100.0|100.0	100.0|100.0	41.16|46.17	44.18|47.93	100.0|100.0	76.45
PRPH2	100.0|100.0	100.0|100.0	100.0|100.0	93.64|100.0	100.0|100.0	100.0|100.0	93.64|100.0	100.0|100.0	93.64|100.0	93.64|100.0	98.73
STEAP1	56.88|100.0	56.88|100.0	56.88|100.0	56.88|100.0	100.0|100.0	100.0|100.0	100.0|100.0	100.0|100.0	100.0|100.0	100.0|100.0	91.38
SH3RF2	100.0|100.0	100.0|100.0	100.0|100.0	47.89|100.0	100.0|100.0	100.0|100.0	47.89|100.0	100.0|100.0	48.31|100.0	47.76|100.0	89.59
PDZRN4	100.0|100.0	97.82|75.0	97.82|75.15	62.52|95.49	97.56|74.7	97.56|74.85	62.21|94.9	100.0|100.0	47.74|95.1	47.44|94.31	84.51
EFCAB6	100.0|100.0	100.0|100.0	100.0|100.0	27.88|100.0	100.0|100.0	100.0|100.0	27.83|100.0	100.0|100.0	27.74|100.0	27.9|100.0	85.57
CDCA4	88.97|100.0	89.71|99.59	88.97|100.0	88.97|100.0	100.0|98.78	100.0|100.0	100.0|100.0	98.78|100.0	98.78|100.0	100.0|100.0	97.63
ARHGAP6	100.0|97.28	100.0|79.61	100.0|79.43	100.0|100.0	98.15|81.04	98.52|80.85	97.28|100.0	100.0|100.0	79.92|100.0	79.74|100.0	93.59
PARD3B	93.94|100.0	100.0|100.0	100.0|100.0	24.83|100.0	100.0|93.85	100.0|94.01	26.48|100.0	100.0|100.0	24.83|100.0	24.85|100.0	84.14
GPSM1	92.19|100.0	100.0|100.0	100.0|100.0	100.0|100.0	100.0|92.19	100.0|92.2	100.0|92.19	100.0|100.0	100.0|100.0	100.0|100.0	98.44
NFKB2	100.0|100.0	100.0|100.0	100.0|100.0	100.0|100.0	100.0|100.0	100.0|100.0	100.0|100.0	100.0|100.0	100.0|100.0	100.0|100.0	100
GREB1L	100.0|100.0	100.0|100.0	100.0|100.0	85.69|100.0	100.0|100.0	100.0|100.0	83.82|100.0	100.0|100.0	83.78|100.0	86.1|100.0	96.97
TCHHL1	97.64|100.0	97.43|100.0	73.88|100.0	97.64|100.0	100.0|100.0	75.83|100.0	100.0|100.0	75.11|100.0	100.0|100.0	100.0|74.57	94.61
FCGR1A	82.24|100.0	81.78|100.0	87.38|92.57	81.78|100.0	100.0|100.0	97.73|85.15	100.0|100.0	97.43|84.41	100.0|100.0	84.9|99.13	93.73
LMBR1	70.5|93.19	96.83|94.95	100.0|100.0	79.6|100.0	89.01|66.02	89.27|69.59	74.87|72.41	89.9|94.49	75.15|97.97	78.98|97.97	86.54
MFSD2A	68.89|78.26	68.89|78.26	69.72|78.46	68.89|87.9	100.0|100.0	100.0|100.0	86.01|96.6	100.0|100.0	86.01|96.6	86.14|97.66	87.41
LMF1	99.71|61.05	99.71|61.05	100.0|60.8	100.0|87.69	99.65|99.65	100.0|99.48	69.82|100.0	99.65|98.95	69.47|99.5	69.34|100.0	88.78
KLK10	70.69|100.0	66.67|100.0	66.22|100.0	70.69|100.0	100.0|100.0	99.28|99.28	100.0|89.1	99.28|99.28	100.0|89.1	99.28|88.46	91.87
GRAMD2A	47.5|94.5	55.09|100.0	53.02|95.94	40.24|81.47	94.5|86.21	94.5|85.94	70.79|72.03	96.24|95.94	73.04|81.47	73.12|81.82	78.67
NUMA1	84.97|99.05	100.0|97.94	99.33|99.09	99.71|97.98	99.0|83.09	99.05|84.77	99.16|83.58	98.36|100.0	98.08|98.49	99.33|97.84	95.94
VGLL3	65.91|85.29	81.53|88.04	81.53|88.31	81.53|88.31	100.0|100.0	100.0|100.0	100.0|100.0	100.0|100.0	100.0|100.0	100.0|100.0	93.02
IL17A	92.31|94.12	93.59|94.19	88.46|87.34	99.36|96.27	100.0|100.0	100.0|100.0	94.12|89.44	100.0|100.0	96.77|93.17	87.34|85.71	94.61
SOST	100.0|100.0	100.0|100.0	100.0|100.0	100.0|100.0	100.0|100.0	100.0|100.0	100.0|100.0	100.0|100.0	100.0|100.0	100.0|100.0	100
SLC9A3	94.62|100.0	100.0|100.0	100.0|96.06	70.43|90.19	100.0|84.31	99.86|81.55	65.06|78.83	88.74|85.96	61.92|88.98	59.98|88.98	86.77
CGREF1	62.24|93.49	62.5|93.87	46.68|56.31	62.5|94.23	100.0|100.0	74.71|60.0	100.0|100.0	75.86|60.92	100.0|100.0	60.0|75.0	78.92
ARMCX2	42.29|41.8	42.29|41.87	4.81|3.7	42.29|61.3	100.0|100.0	42.62|33.16	42.62|62.5	41.87|32.53	41.87|61.3	34.06|64.18	46.85
TDRD7	100.0|100.0	100.0|100.0	100.0|98.12	66.58|100.0	100.0|100.0	100.0|98.12	66.58|100.0	100.0|98.12	66.58|100.0	65.33|100.0	92.97
MRM1	100.0|98.06	87.57|56.74	91.33|98.75	100.0|93.01	84.17|56.74	91.39|100.0	96.11|93.01	54.12|90.31	57.87|83.06	100.0|87.1	85.97
DNAI2	99.33|98.67	86.45|85.88	93.98|90.21	95.99|86.32	85.88|85.88	93.36|90.21	95.35|86.32	85.88|82.99	85.88|77.74	90.21|84.51	89.05
MSANTD4	61.16|61.16	61.16|61.16	61.16|61.16	61.16|61.16	61.16|61.16	61.16|61.16	61.16|61.16	61.16|61.16	61.16|61.16	61.16|61.16	61.16
CAVIN4	100.0|100.0	100.0|100.0	100.0|99.72	100.0|100.0	100.0|100.0	100.0|99.72	100.0|100.0	100.0|100.0	100.0|100.0	99.72|100.0	99.96
RBM47	94.24|96.18	88.16|95.29	87.69|95.42	87.69|95.26	94.44|100.0	94.12|100.0	93.96|100.0	100.0|100.0	100.0|100.0	100.0|100.0	96.12
MEPCE	98.86|99.86	99.14|99.86	99.0|100.0	98.71|100.0	100.0|100.0	100.0|100.0	100.0|100.0	100.0|100.0	100.0|100.0	100.0|100.0	99.77
GATB	99.82|99.82	100.0|100.0	99.82|99.82	78.46|100.0	99.82|99.82	99.82|99.82	78.28|99.77	99.82|99.82	78.46|100.0	78.28|99.77	95.56
POLK	100.0|100.0	96.05|95.06	100.0|100.0	100.0|100.0	95.06|95.06	100.0|100.0	100.0|100.0	95.06|97.07	95.06|96.39	100.0|100.0	98.24
LOC100482856	89.53|100.0	92.42|84.49	52.71|58.87	92.78|100.0	100.0|81.85	58.87|58.87	100.0|96.5	48.18|58.87	84.49|99.61	58.87|56.81	78.69
RTKN2	83.43|96.72	83.0|96.86	84.56|98.84	83.29|96.71	99.67|100.0	100.0|100.0	100.0|100.0	100.0|100.0	100.0|99.67	99.5|98.85	96.06
SUGP1	94.55|98.27	94.55|98.27	96.22|98.91	95.61|98.29	100.0|100.0	100.0|100.0	100.0|100.0	100.0|100.0	100.0|100.0	100.0|100.0	98.73
VIRMA	98.9|98.84	98.9|98.84	100.0|98.93	98.9|98.84	100.0|100.0	100.0|100.0	100.0|100.0	100.0|100.0	100.0|100.0	100.0|100.0	99.61
SOCS5	100.0|100.0	100.0|100.0	100.0|100.0	94.22|100.0	100.0|100.0	100.0|100.0	94.22|100.0	100.0|100.0	94.22|100.0	94.22|100.0	98.84
GLRB	100.0|100.0	100.0|100.0	100.0|100.0	95.57|95.0	100.0|100.0	100.0|100.0	95.57|95.0	100.0|100.0	95.57|95.0	95.77|95.0	98.12
ADCY7	100.0|100.0	100.0|100.0	100.0|100.0	100.0|100.0	100.0|100.0	100.0|100.0	100.0|100.0	100.0|100.0	100.0|100.0	100.0|100.0	100
UBE2F	100.0|100.0	100.0|100.0	100.0|100.0	100.0|100.0	100.0|100.0	100.0|100.0	100.0|100.0	100.0|100.0	100.0|100.0	100.0|100.0	100
DHRSX	86.6|80.79	86.6|98.88	83.01|75.82	66.34|100.0	81.71|100.0	87.8|85.97	61.89|100.0	95.9|76.72	75.75|100.0	57.31|94.58	84.78
PTK7	100.0|100.0	100.0|100.0	98.88|99.62	97.57|95.0	100.0|100.0	98.88|99.62	97.57|95.0	98.88|99.62	97.57|95.0	98.31|95.0	98.33
ACOT11	100.0|100.0	99.66|99.0	98.82|95.77	93.28|89.52	99.83|99.0	98.99|95.77	93.43|89.52	99.5|97.07	94.16|90.97	90.39|89.52	95.71
ACADL	100.0|100.0	94.97|95.4	94.28|95.81	92.68|98.78	100.0|100.0	99.77|99.77	94.19|98.78	99.77|100.0	93.79|99.51	93.95|98.54	97.5
ALKBH4	95.7|93.83	100.0|100.0	99.01|99.67	100.0|100.0	93.83|95.7	93.83|96.33	93.83|96.98	99.01|99.67	100.0|100.0	99.33|100.0	97.84
CEP89	91.04|99.87	90.92|99.74	79.57|84.2	40.62|89.71	100.0|100.0	87.29|84.2	42.99|86.54	87.29|84.2	44.56|89.71	40.96|85.49	80.45
PLLP	31.14|75.27	31.14|75.27	30.91|74.73	31.14|75.27	100.0|100.0	100.0|100.0	100.0|100.0	100.0|100.0	100.0|100.0	100.0|100.0	81.24
ZMYM2	100.0|100.0	100.0|100.0	100.0|100.0	100.0|100.0	100.0|100.0	100.0|100.0	100.0|100.0	100.0|100.0	100.0|100.0	100.0|100.0	100
TASOR2	97.16|99.52	98.29|100.0	89.35|100.0	98.33|100.0	98.96|98.55	91.69|100.0	98.85|100.0	91.36|100.0	100.0|100.0	100.0|92.68	97.74
ACTR6	85.59|100.0	85.16|100.0	85.16|100.0	85.16|100.0	100.0|100.0	100.0|100.0	100.0|100.0	100.0|100.0	100.0|100.0	100.0|100.0	97.05
PPP1R26	100.0|100.0	100.0|100.0	100.0|100.0	94.92|100.0	100.0|100.0	100.0|100.0	95.38|100.0	100.0|100.0	94.83|100.0	99.91|100.0	99.25
SMCHD1	64.86|98.6	64.73|98.65	64.77|98.46	60.83|99.57	100.0|100.0	99.8|99.8	92.68|99.79	99.6|99.35	92.71|99.57	92.53|99.62	91.3
LOC100469257	79.42|100.0	24.38|86.08	79.56|100.0	50.07|97.44	30.91|85.57	100.0|100.0	63.5|96.88	82.47|29.41	89.69|49.43	61.95|95.74	75.13
AGFG1	100.0|100.0	100.0|95.78	100.0|91.38	100.0|100.0	100.0|97.8	100.0|91.9	100.0|100.0	100.0|94.14	97.8|100.0	88.79|100.0	97.88
BARHL2	98.49|100.0	100.0|100.0	100.0|100.0	93.2|100.0	100.0|98.44	100.0|98.44	94.32|100.0	100.0|100.0	92.99|100.0	92.97|100.0	98.44
GLE1	91.49|81.78	91.17|81.38	91.81|81.83	91.49|81.43	90.39|90.26	90.96|90.7	90.39|90.0	100.0|100.0	100.0|100.0	100.0|100.0	91.75
RHOD	94.29|94.29	99.52|99.52	73.81|61.75	99.52|99.52	94.76|94.76	68.57|57.37	94.29|94.29	73.81|61.75	100.0|100.0	61.75|73.81	84.87
OLFML1	43.72|90.05	43.72|90.27	22.58|80.26	43.72|90.27	93.78|94.01	56.22|97.0	99.75|100.0	50.37|86.7	94.01|94.01	97.0|56.36	76.19
STXBP3	86.96|100.0	100.0|100.0	100.0|100.0	94.52|100.0	99.8|86.32	99.8|86.32	93.16|85.48	100.0|100.0	94.26|100.0	94.43|100.0	96.05
RAVER2	93.39|96.51	93.39|75.25	93.24|90.19	27.04|100.0	100.0|77.97	100.0|93.61	27.94|100.0	79.7|95.69	20.17|99.39	26.15|100.0	79.48
CHRNA6	100.0|100.0	100.0|100.0	100.0|100.0	100.0|100.0	100.0|100.0	100.0|100.0	100.0|100.0	100.0|100.0	100.0|100.0	100.0|100.0	100
WWP2	94.3|98.62	94.08|98.62	94.08|98.62	60.64|96.34	100.0|100.0	100.0|100.0	64.91|98.61	100.0|100.0	64.94|98.43	64.94|98.43	91.28
PLOD1	96.56|91.29	100.0|100.0	100.0|100.0	96.56|81.25	91.29|96.56	91.42|96.57	93.24|82.99	100.0|100.0	96.56|81.25	96.57|81.37	93.67
RFX3	90.52|97.36	90.16|100.0	90.16|100.0	62.88|100.0	94.33|100.0	94.33|100.0	64.99|100.0	100.0|100.0	68.89|100.0	68.89|100.0	91.13
LOC100467558	100.0|100.0	100.0|100.0	100.0|100.0	100.0|100.0	100.0|100.0	100.0|100.0	100.0|100.0	100.0|100.0	100.0|100.0	100.0|100.0	100
GDPD4	49.6|95.88	88.53|96.93	74.0|87.82	73.47|98.57	73.45|41.61	88.4|54.27	96.13|66.73	72.99|79.11	67.74|83.01	83.23|94.1	78.28
CAV2	100.0|100.0	100.0|100.0	100.0|100.0	100.0|100.0	100.0|100.0	100.0|100.0	100.0|100.0	100.0|100.0	100.0|100.0	100.0|100.0	100
CDC45	100.0|100.0	100.0|100.0	100.0|100.0	100.0|100.0	100.0|100.0	100.0|100.0	100.0|100.0	100.0|100.0	100.0|100.0	100.0|100.0	100
IFI35	97.9|97.22	63.64|58.52	97.2|97.2	100.0|98.97	62.5|57.88	99.65|100.0	97.57|96.9	57.56|62.59	59.81|64.14	98.6|97.24	83.25
PNPT1	100.0|100.0	100.0|100.0	100.0|99.87	100.0|100.0	100.0|100.0	99.75|100.0	100.0|100.0	99.74|99.87	100.0|100.0	99.87|99.74	99.94
NFATC1	75.08|98.86	99.78|100.0	100.0|100.0	58.29|85.53	95.72|74.39	94.29|70.39	41.23|45.95	100.0|100.0	57.54|82.51	55.06|82.19	80.84
RTF1	100.0|100.0	100.0|100.0	100.0|100.0	96.22|99.13	100.0|100.0	100.0|100.0	97.32|99.71	100.0|100.0	96.07|98.85	94.13|97.11	98.93
TP53BP1	100.0|100.0	100.0|100.0	100.0|100.0	100.0|100.0	100.0|100.0	100.0|100.0	100.0|100.0	100.0|100.0	100.0|100.0	100.0|100.0	100
DPH6	78.14|97.75	78.14|97.75	73.35|90.41	29.34|70.5	100.0|100.0	94.38|92.99	38.95|74.82	94.38|92.99	38.95|74.82	38.38|74.82	76.54
MICALL2	95.23|93.12	100.0|83.94	100.0|89.49	98.62|97.03	100.0|97.79	100.0|98.71	100.0|100.0	100.0|100.0	91.37|100.0	93.56|100.0	96.94
GCK	89.82|42.92	89.82|43.56	89.82|43.66	85.84|45.01	97.46|98.93	94.93|96.56	91.12|100.0	100.0|100.0	92.49|100.0	92.69|100.0	84.73
NDUFB10	100.0|100.0	100.0|100.0	100.0|100.0	100.0|67.43	100.0|100.0	100.0|100.0	100.0|67.43	100.0|100.0	100.0|67.43	100.0|67.43	93.49
FOXN1	100.0|100.0	100.0|97.29	100.0|100.0	87.09|90.61	100.0|97.29	100.0|100.0	86.69|90.61	97.59|100.0	84.34|90.61	86.73|90.94	94.99
LOC100482859	26.99|25.32	29.07|27.18	26.99|26.9	29.07|28.28	100.0|100.0	93.83|99.66	100.0|100.0	92.23|98.28	100.0|100.0	97.59|95.29	69.83
PAFAH2	85.96|100.0	85.96|100.0	90.79|99.76	85.96|100.0	100.0|100.0	100.0|94.46	100.0|100.0	100.0|94.22	100.0|100.0	94.46|100.0	96.58
UBE2J2	100.0|79.92	100.0|79.92	100.0|76.38	100.0|100.0	100.0|100.0	100.0|95.57	79.92|100.0	100.0|95.57	79.92|100.0	76.38|100.0	93.18
SPSB4	100.0|100.0	84.62|93.52	100.0|100.0	69.23|98.44	84.62|93.52	100.0|100.0	69.23|98.44	93.52|84.62	76.52|98.44	69.23|98.44	90.62
BRD4	89.26|85.42	89.18|91.2	92.13|89.36	63.94|83.0	85.42|91.27	88.03|89.22	61.2|83.0	94.06|89.22	52.6|66.76	49.96|66.86	80.05
FBLIM1	43.3|61.99	95.88|100.0	96.91|100.0	97.42|100.0	61.25|44.62	100.0|73.33	100.0|72.22	100.0|100.0	100.0|100.0	100.0|100.0	87.35
TMEM205	100.0|100.0	100.0|100.0	100.0|100.0	100.0|100.0	100.0|100.0	100.0|100.0	100.0|100.0	100.0|100.0	100.0|100.0	100.0|100.0	100
HERC3	100.0|100.0	100.0|100.0	100.0|100.0	97.33|100.0	100.0|100.0	100.0|100.0	97.33|100.0	100.0|100.0	97.33|100.0	97.14|100.0	99.46
NR1D2	100.0|100.0	86.98|100.0	100.0|100.0	89.76|90.54	86.98|100.0	100.0|100.0	89.76|90.54	100.0|87.33	100.0|87.74	90.1|90.89	94.53
CCDC154	64.99|86.85	64.77|83.91	63.98|86.14	71.25|98.0	100.0|97.1	100.0|100.0	94.02|96.77	97.25|100.0	90.87|96.46	95.18|97.23	89.24
CKAP2	100.0|100.0	100.0|100.0	100.0|100.0	100.0|100.0	100.0|100.0	100.0|100.0	100.0|100.0	100.0|100.0	100.0|100.0	100.0|99.71	99.99
SLC9A6	87.57|95.3	91.36|98.73	87.43|95.16	82.2|99.84	100.0|100.0	99.86|99.86	89.6|100.0	100.0|100.0	88.83|99.84	89.46|99.84	95.24
GSTT2B	31.15|32.4	69.62|74.18	69.62|74.18	70.0|74.59	57.6|59.02	57.6|59.02	57.6|59.02	100.0|100.0	100.0|100.0	100.0|100.0	72.28
TBC1D25	85.58|91.2	85.58|95.19	85.58|88.01	85.58|86.84	91.06|95.04	91.34|88.14	91.06|86.7	95.19|88.01	95.04|86.7	88.01|86.84	89.33
CDH5	92.39|91.44	92.39|91.44	92.13|91.07	92.39|91.44	100.0|100.0	100.0|99.87	100.0|100.0	100.0|99.87	100.0|100.0	99.87|100.0	96.72
RSPO3	61.68|61.45	62.04|50.45	62.04|61.37	62.04|84.16	96.0|78.34	74.18|73.65	62.18|84.65	78.34|95.31	50.45|84.16	63.9|87.62	71.7
NAALADL2	91.91|93.52	95.59|98.24	95.71|98.24	20.22|100.0	93.52|94.46	93.52|94.34	20.57|100.0	100.0|100.0	20.78|100.0	20.75|100.0	81.57
CDS1	88.82|100.0	88.82|100.0	88.82|100.0	89.02|97.47	100.0|100.0	100.0|100.0	100.0|97.26	100.0|100.0	100.0|97.26	100.0|97.26	97.24
TMEM64	69.85|64.21	68.7|61.86	68.7|47.24	68.7|60.81	92.28|90.38	92.28|69.03	92.28|88.85	99.31|75.85	100.0|98.31	77.43|99.66	79.29
ARL4C	65.79|91.15	65.79|91.15	65.79|91.15	65.79|100.0	100.0|100.0	100.0|100.0	91.15|100.0	100.0|100.0	91.15|100.0	91.15|100.0	90.5
TAS2R38	100.0|100.0	100.0|100.0	98.8|99.7	100.0|100.0	100.0|100.0	98.8|99.7	100.0|100.0	98.8|99.7	100.0|100.0	99.7|98.8	99.7
CD101	98.91|100.0	91.6|88.03	100.0|98.74	99.6|99.7	86.3|76.54	43.36|39.21	100.0|99.8	90.31|92.06	88.13|91.79	98.94|100.0	89.15
OXLD1	94.34|96.15	100.0|100.0	96.86|76.62	100.0|100.0	96.79|95.57	88.46|68.66	96.15|100.0	84.18|66.17	100.0|100.0	68.66|93.88	91.12
COPB1	100.0|100.0	100.0|100.0	100.0|100.0	100.0|100.0	100.0|100.0	100.0|100.0	100.0|100.0	100.0|100.0	100.0|100.0	100.0|100.0	100
C4H2orf81	96.98|99.84	96.98|97.76	99.52|100.0	97.62|99.19	100.0|98.08	100.0|100.0	100.0|99.03	98.56|100.0	100.0|100.0	100.0|100.0	99.18
KCNK3	99.49|100.0	66.5|80.62	100.0|100.0	39.59|98.73	71.99|79.08	100.0|99.27	41.74|94.3	80.62|64.06	46.77|96.2	38.63|100.0	79.88
MGAT5	100.0|100.0	100.0|100.0	100.0|100.0	43.86|81.66	100.0|100.0	100.0|100.0	43.86|81.66	100.0|100.0	43.86|81.66	43.92|81.66	85.11
RNF114	100.0|100.0	100.0|100.0	99.56|99.13	100.0|100.0	100.0|100.0	99.56|99.13	100.0|100.0	99.56|99.13	100.0|100.0	99.13|99.56	99.74
BRD7	100.0|97.54	100.0|100.0	99.69|97.24	97.32|93.49	97.54|100.0	99.69|99.69	97.39|95.92	99.69|97.24	97.17|93.34	97.39|95.92	97.81
ABCC12	98.75|99.48	100.0|100.0	100.0|99.78	100.0|100.0	99.7|98.9	99.26|98.02	99.48|98.17	100.0|100.0	100.0|100.0	99.85|99.78	99.56
NKX2-2	56.76|69.23	56.76|69.23	56.76|69.23	56.76|69.23	100.0|100.0	100.0|100.0	100.0|100.0	100.0|100.0	100.0|100.0	100.0|100.0	85.2
PROK1	60.18|64.76	60.18|64.76	60.18|64.76	52.21|61.46	100.0|100.0	100.0|100.0	91.43|100.0	100.0|100.0	91.43|100.0	91.43|100.0	83.14
TIMM44	100.0|100.0	100.0|100.0	100.0|100.0	100.0|100.0	100.0|100.0	100.0|100.0	100.0|100.0	100.0|100.0	100.0|100.0	100.0|100.0	100
TMLHE	100.0|100.0	100.0|100.0	100.0|100.0	100.0|100.0	100.0|100.0	100.0|100.0	100.0|100.0	100.0|100.0	100.0|100.0	100.0|100.0	100
ADGRG2	96.57|100.0	100.0|100.0	100.0|100.0	81.18|100.0	100.0|96.57	99.9|96.43	85.32|100.0	100.0|100.0	81.16|100.0	81.96|100.0	95.95
PRL	100.0|100.0	100.0|100.0	100.0|100.0	100.0|93.47	100.0|100.0	100.0|100.0	100.0|94.29	100.0|100.0	100.0|93.47	94.3|87.76	98.16
MAPK7	100.0|100.0	100.0|100.0	100.0|100.0	100.0|100.0	100.0|100.0	100.0|100.0	100.0|100.0	100.0|100.0	100.0|100.0	100.0|100.0	100
REPIN1	19.63|22.29	59.42|70.72	58.77|74.71	9.69|14.48	22.29|23.36	22.29|24.96	4.46|5.87	71.65|76.54	11.53|14.48	12.48|14.68	31.72
PSRC1	78.12|91.74	79.17|86.86	80.73|94.22	58.33|74.67	100.0|93.43	100.0|100.0	76.15|83.0	96.29|100.0	71.71|83.67	76.9|84.33	85.47
B3GLCT	69.12|96.44	69.12|92.38	69.12|94.27	67.32|96.98	99.58|95.39	99.37|97.14	93.31|96.33	97.39|99.39	89.38|96.33	91.21|96.33	90.3
SH2B2	59.74|98.42	56.39|88.25	100.0|100.0	56.07|91.17	94.21|89.5	100.0|61.67	92.37|91.17	89.75|57.81	90.25|93.77	57.0|91.95	82.97
FBLN2	100.0|100.0	100.0|100.0	100.0|100.0	34.36|91.34	100.0|100.0	100.0|100.0	34.42|91.34	100.0|100.0	34.34|91.34	34.97|92.42	85.23
SLC35A3	85.55|87.57	85.55|73.82	85.55|90.8	85.55|70.31	98.22|82.79	96.45|100.0	98.22|78.86	81.3|100.0	99.75|95.01	100.0|77.43	88.64
ILF3	82.67|83.04	82.67|82.67	82.56|81.56	82.67|83.04	83.04|82.67	82.48|81.12	82.59|82.59	82.56|81.56	82.67|83.04	82.66|84.04	82.6
BTBD7	100.0|100.0	100.0|100.0	100.0|100.0	100.0|100.0	100.0|100.0	100.0|100.0	100.0|100.0	100.0|100.0	100.0|100.0	100.0|100.0	100
MAP3K7CL	85.03|100.0	100.0|100.0	85.03|100.0	59.88|86.21	100.0|85.03	100.0|100.0	70.42|86.21	85.03|100.0	59.88|86.21	70.42|86.21	87.28
LOC100474049	96.3|100.0	96.3|100.0	95.37|97.91	96.3|100.0	100.0|100.0	99.81|98.67	100.0|100.0	99.23|98.1	100.0|100.0	97.53|100.0	98.78
GKN1	100.0|91.13	99.46|65.25	100.0|100.0	99.46|79.31	99.51|71.63	90.64|100.0	99.51|87.07	65.6|100.0	72.34|87.93	100.0|79.31	89.41
ZCCHC4	80.68|91.83	80.51|91.46	73.33|83.79	81.54|92.44	100.0|100.0	91.83|92.19	100.0|100.0	91.84|92.38	100.0|100.0	92.58|91.86	91.41
GORAB	100.0|100.0	100.0|100.0	94.21|100.0	93.7|100.0	100.0|100.0	87.91|94.84	93.7|100.0	94.21|100.0	93.7|100.0	94.84|94.07	97.06
SLC24A4	98.47|96.02	98.98|93.12	98.47|93.09	87.24|100.0	100.0|100.0	100.0|100.0	85.07|100.0	100.0|100.0	82.56|100.0	82.48|100.0	95.78
AK7	100.0|100.0	95.29|91.01	99.86|99.72	99.58|99.72	95.29|91.01	100.0|100.0	100.0|100.0	91.14|95.3	91.01|95.42	99.59|99.86	97.19
DDX41	85.21|88.91	85.21|88.91	85.21|87.36	86.9|89.1	100.0|100.0	94.69|93.05	100.0|100.0	94.69|93.05	100.0|100.0	94.79|94.79	93.09
MFSD2B	97.1|100.0	90.54|72.83	90.35|94.74	90.35|93.41	96.42|75.31	96.22|97.98	96.22|96.61	74.53|97.17	76.86|98.8	99.39|98.0	91.64
STAC	74.83|100.0	94.33|91.43	83.45|91.32	58.5|99.61	100.0|72.53	100.0|81.89	78.48|100.0	100.0|100.0	56.92|100.0	64.27|100.0	87.38
KCNK9	97.56|74.87	97.56|98.25	100.0|77.36	91.99|100.0	74.87|98.25	100.0|100.0	70.59|100.0	100.0|77.36	92.63|100.0	74.13|100.0	91.27
TNN	100.0|100.0	100.0|100.0	100.0|99.74	88.62|100.0	100.0|100.0	100.0|99.74	82.13|96.72	100.0|100.0	94.31|96.72	82.76|100.0	97.04
RPP30	98.88|92.66	100.0|100.0	100.0|100.0	100.0|100.0	92.66|98.88	92.66|98.88	92.66|98.88	100.0|100.0	100.0|100.0	100.0|100.0	98.31
C3H5orf63	95.8|99.13	100.0|89.55	93.28|96.52	100.0|100.0	99.13|85.07	96.52|96.52	99.13|95.0	82.84|96.52	89.55|100.0	96.52|92.5	95.18
KDM3B	96.36|99.82	97.72|99.83	100.0|100.0	100.0|100.0	99.82|98.43	100.0|96.42	99.82|96.58	100.0|97.96	99.94|98.06	100.0|100.0	99.04
GPR82	99.7|99.7	99.7|99.7	97.62|100.0	99.7|99.7	100.0|100.0	97.62|100.0	100.0|100.0	97.62|100.0	100.0|100.0	100.0|97.62	99.43
ESR2	88.71|93.47	100.0|100.0	100.0|100.0	100.0|100.0	93.67|88.73	96.74|88.89	97.12|89.08	100.0|100.0	100.0|100.0	100.0|100.0	96.82
GTPBP1	95.37|95.52	95.37|95.52	95.37|95.66	95.37|95.66	100.0|100.0	100.0|100.0	100.0|100.0	100.0|100.0	100.0|100.0	100.0|100.0	98.19
BPIFB1	84.17|98.32	83.99|98.32	83.63|98.1	83.99|98.32	100.0|100.0	100.0|100.0	100.0|100.0	100.0|100.0	100.0|100.0	100.0|100.0	96.44
SPATS2L	94.91|100.0	96.1|95.93	96.43|98.27	94.74|100.0	100.0|94.75	100.0|96.89	100.0|100.0	96.1|98.1	94.58|100.0	96.71|100.0	97.68
OXA1L	100.0|96.29	100.0|95.62	100.0|96.3	100.0|95.62	100.0|100.0	100.0|100.0	100.0|100.0	100.0|100.0	100.0|100.0	100.0|100.0	99.19
CEBPZ	100.0|90.87	100.0|94.9	100.0|95.34	100.0|95.08	95.75|100.0	95.93|100.0	95.75|100.0	100.0|100.0	100.0|100.0	100.0|100.0	98.18
ACBD4	52.01|49.56	93.81|100.0	100.0|100.0	94.43|100.0	49.56|55.45	49.56|51.38	49.56|55.08	100.0|100.0	100.0|100.0	100.0|100.0	80.02
VWA1	66.45|100.0	60.09|92.57	99.78|100.0	71.71|85.6	96.7|98.99	99.67|72.77	92.74|73.56	99.66|71.08	95.95|74.35	77.11|83.77	85.63
CCDC102A	100.0|100.0	71.78|100.0	100.0|100.0	67.29|95.49	69.2|99.74	100.0|100.0	65.22|95.49	98.43|68.67	93.99|95.49	65.76|95.76	89.12
EBI3	97.79|99.1	100.0|100.0	100.0|100.0	100.0|100.0	100.0|100.0	95.52|93.42	100.0|100.0	96.9|96.05	100.0|100.0	96.49|96.49	98.59
PDC	91.84|100.0	100.0|100.0	99.18|99.59	100.0|100.0	100.0|91.84	99.11|91.39	100.0|91.84	99.18|99.59	100.0|100.0	99.59|99.18	98.12
KCNJ11	100.0|100.0	100.0|100.0	100.0|100.0	75.13|82.77	100.0|100.0	100.0|100.0	75.13|82.77	100.0|100.0	75.13|82.77	75.13|82.77	91.58
HUNK	93.15|100.0	97.98|100.0	98.13|88.24	93.15|100.0	100.0|95.07	100.0|83.75	100.0|100.0	99.84|87.96	95.07|100.0	83.75|100.0	95.8
TP53INP2	100.0|100.0	100.0|100.0	100.0|100.0	55.66|77.85	100.0|100.0	100.0|100.0	54.91|77.85	100.0|100.0	54.67|77.85	55.66|77.85	86.62
CAPN13	100.0|100.0	100.0|100.0	98.95|99.55	100.0|100.0	100.0|100.0	99.25|99.55	100.0|100.0	100.0|100.0	100.0|100.0	100.0|100.0	99.87
EIF2B1	100.0|100.0	100.0|76.63	100.0|100.0	62.95|98.97	100.0|76.63	100.0|100.0	62.95|98.97	76.63|100.0	48.24|98.97	62.95|98.97	88.14
PRDX2	100.0|99.5	100.0|100.0	100.0|100.0	100.0|100.0	99.5|100.0	99.5|100.0	99.5|100.0	100.0|100.0	100.0|100.0	100.0|100.0	99.9
RPRD2	98.7|98.5	98.5|98.56	99.73|99.25	91.38|100.0	98.5|98.77	99.73|99.46	91.4|100.0	99.73|99.18	91.44|100.0	90.95|100.0	97.69
ARHGEF40	93.41|99.93	93.47|97.75	95.75|100.0	81.65|100.0	99.93|97.68	100.0|100.0	87.35|100.0	98.39|100.0	85.38|100.0	87.61|100.0	95.92
TMEM54	69.72|76.45	80.63|95.82	68.66|89.04	79.93|88.67	90.35|97.91	81.85|96.8	83.78|84.77	97.91|100.0	100.0|93.36	99.09|84.77	87.98
GTPBP8	99.65|97.29	90.62|75.43	98.96|100.0	99.31|96.62	88.47|75.43	92.88|96.14	100.0|100.0	75.72|91.93	75.43|88.18	96.49|92.91	91.57
LAMA4	90.25|86.79	90.63|92.27	90.36|92.4	61.17|100.0	94.67|100.0	94.36|100.0	58.83|100.0	100.0|100.0	62.28|100.0	62.61|100.0	88.83
TUFM	81.54|98.41	100.0|100.0	99.34|100.0	100.0|91.37	100.0|82.77	98.41|82.08	98.41|74.5	100.0|100.0	100.0|94.38	100.0|90.76	94.6
GARNL3	91.85|99.9	100.0|100.0	96.39|100.0	96.3|100.0	99.7|91.92	99.8|95.47	99.7|95.38	96.47|100.0	96.38|100.0	100.0|100.0	97.96
UTP25	100.0|95.37	100.0|100.0	100.0|100.0	100.0|100.0	95.12|100.0	96.12|100.0	95.12|100.0	100.0|100.0	100.0|100.0	100.0|100.0	99.09
COMMD9	91.92|100.0	100.0|100.0	100.0|100.0	91.92|89.66	100.0|91.92	100.0|91.92	100.0|89.66	100.0|100.0	98.99|96.55	91.92|89.66	96.21
LRRTM2	100.0|100.0	100.0|100.0	100.0|100.0	99.81|98.1	100.0|100.0	100.0|100.0	99.81|98.1	100.0|100.0	99.81|98.1	100.0|98.1	99.59
QRICH1	100.0|100.0	100.0|100.0	100.0|100.0	100.0|100.0	100.0|100.0	100.0|100.0	100.0|100.0	100.0|100.0	100.0|100.0	100.0|100.0	100
CWC25	100.0|100.0	100.0|100.0	100.0|100.0	100.0|100.0	100.0|100.0	100.0|100.0	100.0|100.0	100.0|100.0	100.0|100.0	100.0|100.0	100
ADGRF2	94.93|97.76	92.46|100.0	94.49|96.88	86.52|92.99	95.22|100.0	99.55|99.11	89.1|92.99	100.0|94.95	92.32|91.74	89.0|93.3	94.67
AP4E1	100.0|100.0	99.74|99.04	100.0|100.0	100.0|100.0	99.74|99.04	100.0|100.0	100.0|100.0	99.04|100.0	99.83|100.0	100.0|100.0	99.82
CCDC69	94.41|97.62	93.09|95.29	36.84|55.45	90.79|100.0	95.58|94.61	40.14|58.42	93.88|100.0	39.73|58.42	92.93|100.0	55.45|40.58	76.66
FBXO15	100.0|100.0	100.0|100.0	100.0|100.0	93.96|94.92	100.0|100.0	100.0|100.0	90.72|95.33	100.0|100.0	96.06|99.19	90.62|94.31	97.76
SGCB	93.1|100.0	93.1|100.0	93.42|93.12	93.42|88.17	100.0|100.0	100.0|92.81	100.0|87.87	100.0|92.81	100.0|87.87	94.69|89.64	95
BICD2	100.0|100.0	100.0|100.0	100.0|100.0	59.93|87.89	100.0|100.0	100.0|100.0	59.93|87.89	100.0|100.0	59.93|87.89	59.34|88.6	89.57
IL1RL2	94.64|80.44	94.46|85.85	94.64|95.3	96.19|86.07	100.0|100.0	81.76|96.86	83.09|87.46	87.26|96.69	93.24|91.8	95.3|84.67	91.29
SRCIN1	89.04|100.0	89.04|93.58	87.27|100.0	89.1|93.95	100.0|100.0	88.86|86.96	100.0|100.0	88.74|98.75	100.0|100.0	98.23|88.57	94.6
STARD4	78.37|91.06	100.0|100.0	100.0|92.86	100.0|100.0	91.06|100.0	93.3|74.55	91.06|78.37	100.0|92.86	100.0|100.0	92.86|100.0	93.82
ELP1	99.63|100.0	100.0|100.0	99.85|100.0	99.63|100.0	100.0|100.0	100.0|100.0	100.0|100.0	100.0|100.0	100.0|100.0	100.0|100.0	99.96
FZD3	100.0|100.0	100.0|100.0	100.0|100.0	65.62|99.32	100.0|100.0	100.0|100.0	65.62|99.32	100.0|100.0	65.62|99.32	65.62|99.32	92.99
CCDC190	99.67|99.67	95.03|95.99	95.7|100.0	97.68|96.09	96.36|97.32	95.7|100.0	99.67|98.05	93.65|96.89	96.32|93.81	100.0|94.14	97.09
INHBC	100.0|100.0	100.0|100.0	100.0|100.0	100.0|100.0	100.0|100.0	100.0|100.0	100.0|100.0	100.0|100.0	100.0|100.0	100.0|100.0	100
HIP1	82.53|93.34	100.0|100.0	100.0|100.0	96.24|100.0	93.34|82.53	93.45|83.19	93.34|85.76	100.0|100.0	96.24|100.0	96.99|100.0	94.85
MAB21L3	90.55|100.0	90.55|100.0	90.55|84.85	90.55|100.0	100.0|100.0	100.0|84.38	100.0|100.0	100.0|84.38	100.0|100.0	84.38|100.0	95.01
MAP7	95.96|89.01	100.0|100.0	95.83|99.73	95.83|99.59	88.53|95.44	100.0|100.0	89.73|100.0	96.35|100.0	96.35|100.0	99.05|98.92	97.02
ZNF532	100.0|100.0	100.0|98.34	100.0|100.0	100.0|99.32	100.0|98.34	100.0|100.0	100.0|99.32	98.79|100.0	99.24|99.77	100.0|99.32	99.62
TNPO3	100.0|100.0	100.0|100.0	100.0|100.0	91.64|100.0	100.0|100.0	100.0|100.0	91.33|99.88	100.0|100.0	91.33|99.88	90.74|99.88	98.23
TRAF3	100.0|100.0	100.0|100.0	100.0|100.0	100.0|100.0	100.0|100.0	100.0|100.0	100.0|100.0	100.0|100.0	100.0|100.0	100.0|100.0	100
NCBP3	100.0|100.0	100.0|100.0	94.57|96.26	97.12|96.35	100.0|100.0	94.57|96.26	97.12|96.35	94.57|96.26	97.12|96.35	100.0|100.0	97.65
PEG3	100.0|100.0	100.0|100.0	97.27|100.0	82.71|100.0	100.0|100.0	100.0|100.0	86.51|88.5	98.2|100.0	82.78|100.0	80.58|97.55	95.71
ANKRD22	100.0|100.0	96.86|78.06	100.0|100.0	97.38|100.0	96.86|78.06	100.0|100.0	97.38|100.0	78.06|96.86	78.06|99.46	97.38|100.0	94.72
LOC100479163	42.11|100.0	96.93|95.67	96.93|95.67	71.05|100.0	100.0|41.56	100.0|41.56	100.0|59.26	100.0|100.0	70.13|100.0	70.13|100.0	84.05
LY9	100.0|100.0	100.0|100.0	100.0|100.0	73.16|76.52	100.0|100.0	100.0|100.0	73.46|76.35	100.0|100.0	71.18|74.22	68.96|74.06	89.4
GALNT18	81.07|87.48	81.07|87.48	83.36|87.78	37.4|98.0	100.0|100.0	100.0|100.0	40.36|98.0	100.0|100.0	40.36|98.0	39.39|98.0	82.89
LOC100469042	49.54|73.72	21.79|100.0	42.66|70.72	43.81|71.27	32.42|100.0	100.0|100.0	92.49|100.0	100.0|36.12	74.74|26.49	100.0|100.0	71.79
FFAR4	99.45|99.45	99.45|99.45	100.0|100.0	100.0|99.47	100.0|100.0	100.0|100.0	100.0|100.0	100.0|100.0	100.0|100.0	100.0|100.0	99.86
P2RY6	99.32|74.43	99.32|89.63	99.32|89.63	99.32|89.63	83.04|100.0	82.53|99.39	83.04|100.0	99.39|99.39	100.0|100.0	99.39|99.39	94.31
DDX42	88.75|88.09	88.1|87.91	87.89|88.27	87.89|88.55	87.45|87.91	87.23|88.27	87.23|88.55	87.7|88.27	87.7|88.55	88.27|88.55	88.06
LOC100471710	97.0|98.85	91.01|78.14	88.01|89.35	89.89|66.48	92.75|78.14	89.69|89.35	91.6|66.48	81.35|96.2	74.92|64.54	90.49|65.93	84.01
ZNF496	100.0|100.0	100.0|100.0	100.0|100.0	100.0|100.0	100.0|100.0	100.0|100.0	100.0|100.0	100.0|100.0	100.0|100.0	100.0|100.0	100
CLN6	90.71|93.09	100.0|99.68	99.68|100.0	90.71|97.25	93.42|90.73	93.42|92.21	93.42|97.59	99.68|100.0	90.73|97.59	94.16|99.66	95.69
TEX15	100.0|100.0	100.0|100.0	91.22|100.0	99.75|100.0	100.0|100.0	91.29|100.0	99.84|100.0	91.44|100.0	99.91|100.0	100.0|91.61	98.25
ERCC3	96.66|96.29	96.53|96.66	96.79|96.3	96.66|88.8	100.0|100.0	100.0|100.0	100.0|92.22	100.0|100.0	100.0|92.22	100.0|92.33	97.07
RNF43	99.74|99.36	99.74|99.49	100.0|99.74	89.2|99.28	100.0|100.0	100.0|100.0	89.5|100.0	100.0|100.0	89.62|100.0	89.92|100.0	97.78
PATJ	95.49|99.78	100.0|100.0	99.95|100.0	61.94|99.4	100.0|95.55	100.0|99.14	64.89|99.66	98.69|100.0	61.17|99.57	63.24|100.0	91.92
GTF3C3	100.0|100.0	100.0|100.0	100.0|100.0	100.0|94.74	100.0|100.0	100.0|100.0	100.0|94.74	100.0|100.0	100.0|94.74	100.0|94.85	98.95
VSTM2L	100.0|100.0	100.0|100.0	100.0|100.0	86.27|43.46	100.0|100.0	100.0|100.0	86.27|43.46	100.0|100.0	86.27|43.46	87.13|43.46	85.99
EGR4	100.0|100.0	82.45|100.0	82.79|100.0	100.0|100.0	82.59|100.0	82.76|100.0	100.0|100.0	100.0|100.0	100.0|82.45	100.0|82.79	94.79
GCGR	46.43|71.93	55.03|85.6	54.63|85.15	51.85|99.75	95.08|95.47	95.7|96.29	69.88|86.77	100.0|100.0	80.66|99.75	79.59|98.22	82.39
SLC8B1	95.15|100.0	86.73|92.57	94.98|100.0	89.97|93.92	90.65|92.06	100.0|100.0	91.84|91.22	92.06|91.11	94.65|92.57	93.85|92.74	93.8
DACT1	100.0|100.0	100.0|100.0	94.42|99.63	57.44|100.0	100.0|100.0	100.0|94.97	64.95|100.0	100.0|97.18	63.12|100.0	54.36|89.86	90.8
STC2	100.0|100.0	100.0|100.0	100.0|100.0	100.0|100.0	100.0|100.0	100.0|100.0	100.0|100.0	100.0|100.0	100.0|100.0	100.0|100.0	100
CYTIP	65.64|99.67	66.52|85.55	66.96|84.68	66.3|84.55	100.0|84.7	100.0|83.84	99.67|83.71	100.0|100.0	100.0|100.0	100.0|100.0	88.59
HSD17B14	100.0|100.0	100.0|100.0	99.63|98.53	100.0|100.0	100.0|100.0	100.0|99.27	100.0|100.0	99.63|98.53	100.0|100.0	98.53|99.63	99.69
CC2D1B	100.0|100.0	100.0|100.0	100.0|100.0	100.0|98.52	100.0|100.0	100.0|100.0	100.0|97.05	100.0|100.0	100.0|97.73	100.0|97.16	99.52
AVPR1A	100.0|99.29	100.0|99.29	100.0|100.0	100.0|100.0	100.0|100.0	99.29|98.82	99.29|100.0	100.0|100.0	99.29|100.0	98.82|100.0	99.7
SGMS1	100.0|99.76	100.0|100.0	100.0|98.57	100.0|100.0	99.76|100.0	100.0|99.28	98.79|100.0	100.0|98.57	100.0|100.0	98.57|100.0	99.67
SLC25A37	88.15|89.97	88.15|90.24	88.15|90.24	70.81|86.27	100.0|100.0	100.0|100.0	82.3|98.24	100.0|100.0	82.54|98.24	82.54|98.24	91.7
ZFAT	89.76|99.6	90.34|99.6	89.91|100.0	70.37|92.46	99.6|98.96	100.0|100.0	78.0|92.37	99.2|100.0	77.58|92.46	79.06|93.32	92.13
ZNF652	100.0|100.0	100.0|100.0	100.0|100.0	62.11|79.54	100.0|100.0	100.0|100.0	89.22|100.0	100.0|100.0	89.13|100.0	62.66|80.38	93.15
FAM135A	96.39|96.95	96.39|96.95	96.52|99.4	91.55|100.0	100.0|100.0	100.0|100.0	92.09|100.0	100.0|100.0	92.09|100.0	93.89|99.93	97.61
TMEM87A	100.0|100.0	100.0|100.0	100.0|99.29	92.61|100.0	100.0|100.0	100.0|99.46	92.63|100.0	100.0|99.46	92.46|100.0	92.5|100.0	98.42
POLA2	85.0|100.0	93.29|99.39	85.71|100.0	85.57|100.0	100.0|90.56	100.0|100.0	100.0|100.0	91.32|100.0	91.17|100.0	100.0|100.0	96.1
SQSTM1	68.24|100.0	64.97|100.0	68.42|85.29	64.97|100.0	95.69|100.0	100.0|84.39	95.69|100.0	100.0|80.32	100.0|100.0	80.32|100.0	89.42
TBCCD1	100.0|100.0	100.0|100.0	99.1|100.0	100.0|100.0	100.0|100.0	99.1|100.0	100.0|100.0	99.1|100.0	100.0|100.0	100.0|99.1	99.82
CWH43	100.0|97.85	100.0|97.85	100.0|97.85	100.0|97.85	100.0|100.0	100.0|100.0	100.0|100.0	100.0|100.0	100.0|100.0	100.0|100.0	99.57
GABPA	100.0|100.0	100.0|100.0	99.78|100.0	100.0|100.0	100.0|100.0	99.78|99.78	100.0|100.0	99.78|99.78	100.0|100.0	100.0|99.78	99.93
GHRHR	90.77|100.0	90.77|100.0	90.77|100.0	90.77|100.0	100.0|100.0	100.0|100.0	100.0|100.0	100.0|100.0	100.0|100.0	100.0|100.0	98.15
MTHFD1L	97.86|99.78	64.0|96.77	99.04|94.88	64.0|99.34	65.14|96.61	98.37|92.43	65.14|99.17	96.61|61.21	97.42|100.0	61.21|99.17	87.41
KCNIP2	100.0|100.0	100.0|100.0	100.0|100.0	100.0|100.0	100.0|100.0	100.0|100.0	100.0|100.0	100.0|100.0	100.0|100.0	100.0|100.0	100
SLC39A10	100.0|63.56	99.81|63.39	93.76|59.54	99.81|63.39	100.0|100.0	100.0|100.0	100.0|100.0	100.0|100.0	100.0|100.0	100.0|100.0	92.16
LOC100470802	100.0|70.63	100.0|67.86	100.0|68.01	91.8|92.32	100.0|99.0	100.0|99.25	68.38|99.87	100.0|100.0	65.69|99.87	65.75|99.75	89.41
FAM3D	99.55|100.0	100.0|100.0	99.55|100.0	99.55|100.0	100.0|99.55	99.55|99.55	100.0|100.0	99.55|100.0	99.55|100.0	99.55|99.55	99.78
MADD	100.0|100.0	100.0|100.0	100.0|100.0	100.0|100.0	100.0|100.0	100.0|100.0	100.0|100.0	100.0|100.0	100.0|100.0	100.0|100.0	100
SLC45A1	97.26|100.0	95.23|100.0	89.62|100.0	14.92|60.39	95.09|97.12	92.39|100.0	15.46|60.87	94.24|100.0	15.66|60.39	16.64|60.39	73.28
ABCC10	100.0|99.8	100.0|100.0	100.0|99.67	67.85|88.61	99.8|100.0	100.0|99.93	67.72|88.61	100.0|99.67	67.85|88.61	66.51|88.96	91.18
FXR1	100.0|100.0	100.0|100.0	100.0|100.0	97.84|99.84	100.0|100.0	100.0|100.0	97.84|99.84	100.0|100.0	97.93|100.0	97.93|100.0	99.56
OTUD7A	83.64|100.0	85.77|82.48	87.23|70.84	82.58|79.92	100.0|78.77	100.0|67.71	100.0|79.79	100.0|100.0	78.9|79.41	67.28|80.18	85.23
SPAG8	100.0|98.9	100.0|100.0	100.0|100.0	47.74|55.97	98.24|100.0	100.0|100.0	45.93|55.44	100.0|100.0	47.84|55.7	47.87|59.68	80.67
LOC100471635	95.29|100.0	99.28|93.09	100.0|100.0	100.0|99.89	100.0|90.83	100.0|93.22	100.0|89.5	91.73|93.1	94.56|89.5	100.0|100.0	96.5
PLPP2	49.72|82.62	57.25|100.0	50.46|99.64	49.72|81.63	87.5|91.99	78.66|93.48	96.95|95.78	95.83|100.0	94.87|89.16	93.48|77.71	83.32
MVD	80.51|94.0	80.51|94.0	79.87|93.02	80.51|94.0	100.0|100.0	99.5|99.25	100.0|100.0	99.5|99.25	100.0|100.0	98.75|99.0	94.58
CRYBB1	82.26|82.93	82.26|69.15	81.85|81.2	82.66|82.66	100.0|84.75	82.52|81.2	82.93|82.26	68.81|81.2	69.15|82.26	81.2|81.85	81.16
DTHD1	51.55|96.68	100.0|99.89	100.0|100.0	99.67|99.56	96.68|51.49	96.89|51.6	96.68|51.49	100.0|100.0	99.78|99.78	100.0|100.0	89.59
TRUB2	90.29|86.58	86.0|87.76	86.86|91.84	88.29|93.35	90.41|96.21	90.41|99.7	90.68|100.0	96.21|99.7	96.21|99.7	99.7|99.7	93.48
A4GNT	96.67|96.94	94.44|99.71	94.44|99.71	94.44|99.71	94.99|100.0	94.71|99.71	94.99|100.0	100.0|100.0	100.0|100.0	100.0|100.0	98.02
NPHS1	95.91|100.0	100.0|100.0	96.99|100.0	100.0|100.0	100.0|95.91	99.19|98.09	100.0|95.91	96.61|99.76	100.0|100.0	99.6|96.6	98.73
P2RX3	71.98|89.92	71.98|89.92	71.98|89.92	71.98|89.92	100.0|100.0	100.0|100.0	100.0|100.0	100.0|100.0	100.0|100.0	100.0|100.0	92.38
GPS1	100.0|95.33	100.0|81.34	100.0|85.36	100.0|78.36	100.0|86.05	100.0|89.54	100.0|82.2	87.14|91.44	87.5|84.29	94.49|86.74	91.49
IFFO1	100.0|100.0	100.0|100.0	100.0|100.0	100.0|100.0	100.0|100.0	100.0|100.0	100.0|100.0	100.0|100.0	100.0|100.0	100.0|100.0	100
TNFSF8	100.0|100.0	100.0|100.0	100.0|100.0	91.88|100.0	100.0|100.0	100.0|100.0	91.88|100.0	100.0|100.0	91.88|100.0	83.68|93.02	97.62
CNOT4	100.0|100.0	100.0|100.0	100.0|100.0	76.02|94.26	100.0|100.0	100.0|100.0	76.34|94.26	100.0|100.0	76.02|94.26	76.34|94.26	94.09
RAPGEF4	93.03|85.86	93.03|85.86	93.03|85.86	19.4|97.31	100.0|100.0	100.0|100.0	17.9|97.31	100.0|100.0	17.9|97.31	17.9|97.31	79.95
SNRNP200	100.0|100.0	100.0|100.0	100.0|100.0	100.0|100.0	100.0|100.0	100.0|100.0	100.0|100.0	100.0|100.0	100.0|100.0	100.0|100.0	100
TNFSF9	96.46|100.0	93.31|100.0	97.64|80.26	69.29|90.26	92.62|96.58	66.39|52.43	66.8|83.59	69.23|52.43	75.21|90.26	55.34|87.69	80.79
SORBS3	100.0|41.94	100.0|46.22	100.0|42.16	100.0|44.11	93.17|100.0	100.0|100.0	100.0|100.0	100.0|92.5	100.0|97.27	100.0|100.0	87.87
TNR	100.0|100.0	100.0|100.0	100.0|100.0	100.0|100.0	100.0|100.0	100.0|100.0	100.0|100.0	100.0|100.0	100.0|100.0	100.0|100.0	100
WHAMM	46.11|87.15	96.79|100.0	97.65|99.62	72.68|88.55	87.15|51.95	88.32|47.67	87.15|56.17	100.0|100.0	84.96|91.87	77.18|92.17	82.66
CSRP3	100.0|100.0	100.0|100.0	100.0|100.0	100.0|100.0	100.0|100.0	100.0|100.0	100.0|100.0	100.0|100.0	100.0|100.0	100.0|100.0	100
UBA6	52.63|99.05	52.63|99.14	52.63|98.96	52.63|73.69	100.0|100.0	100.0|99.91	100.0|74.4	100.0|99.91	100.0|74.4	99.91|74.4	85.21
PYCR3	94.1|99.63	95.83|98.22	94.79|99.64	88.89|100.0	100.0|96.8	95.96|95.26	89.71|95.31	95.37|97.81	90.39|99.22	93.43|100.0	96.02
ST8SIA2	100.0|100.0	100.0|100.0	100.0|100.0	91.2|100.0	100.0|100.0	100.0|100.0	91.2|100.0	100.0|100.0	89.87|98.54	91.2|100.0	98.1
PPP1R3F	100.0|100.0	100.0|100.0	100.0|100.0	100.0|100.0	100.0|100.0	100.0|100.0	100.0|100.0	100.0|100.0	100.0|100.0	100.0|100.0	100
COL7A1	42.85|42.79	42.78|42.75	42.75|42.63	42.71|54.45	42.86|42.89	42.82|42.76	42.79|54.62	42.78|42.7	42.75|54.54	42.63|54.49	45.12
PLEKHA1	74.26|78.53	100.0|100.0	74.26|78.33	75.25|74.88	78.53|74.44	100.0|100.0	78.53|73.89	74.44|78.33	75.43|74.88	97.13|91.63	82.64
ZYG11A	74.97|99.48	99.47|99.87	99.21|99.08	99.6|100.0	99.48|75.26	99.48|74.87	99.48|75.26	99.6|99.08	99.6|99.6	99.21|99.74	94.62
UPB1	94.56|95.05	87.56|84.5	94.3|92.62	94.56|95.05	92.97|89.25	100.0|97.71	100.0|100.0	89.25|90.84	89.25|92.97	97.71|100.0	93.91
NUDT12	100.0|84.31	100.0|99.35	100.0|100.0	100.0|100.0	84.67|99.78	84.31|100.0	84.31|100.0	99.35|100.0	99.35|100.0	100.0|100.0	96.77
CLDN8	86.72|98.67	86.72|98.67	86.72|98.67	86.72|98.67	100.0|100.0	100.0|100.0	100.0|100.0	100.0|100.0	100.0|100.0	100.0|100.0	97.08
ABTB1	73.46|72.38	73.46|72.38	74.1|73.01	74.1|73.01	100.0|100.0	100.0|100.0	100.0|100.0	100.0|100.0	100.0|100.0	100.0|100.0	89.3
SIK1	52.67|95.43	53.46|94.76	53.82|95.89	48.78|85.48	100.0|99.36	100.0|100.0	86.16|83.33	100.0|100.0	86.08|85.1	85.62|84.22	84.51
KLF1	100.0|100.0	100.0|100.0	100.0|98.67	100.0|100.0	100.0|100.0	100.0|100.0	100.0|100.0	100.0|97.34	100.0|100.0	97.61|100.0	99.68
PTPA	89.88|100.0	100.0|100.0	99.71|100.0	100.0|100.0	100.0|89.16	99.65|88.85	100.0|89.16	99.69|99.69	100.0|100.0	99.69|99.69	97.76
KDM5B	98.52|90.72	95.12|99.8	96.79|97.6	96.79|97.6	88.88|100.0	92.9|100.0	92.9|100.0	99.46|95.6	99.46|95.6	100.0|100.0	96.89
MINAR2	78.84|100.0	78.84|100.0	79.67|99.48	78.84|100.0	100.0|100.0	100.0|98.45	100.0|100.0	100.0|98.45	100.0|100.0	98.45|100.0	95.55
COIL	100.0|100.0	100.0|100.0	99.83|100.0	100.0|100.0	100.0|100.0	99.83|100.0	100.0|100.0	100.0|100.0	100.0|100.0	100.0|99.83	99.97
RAD50	100.0|100.0	96.72|94.99	100.0|100.0	100.0|92.59	96.72|94.99	100.0|100.0	100.0|92.59	94.99|96.72	94.99|89.56	100.0|92.59	96.87
NIPBL	100.0|100.0	100.0|100.0	100.0|100.0	78.35|99.5	100.0|100.0	100.0|100.0	78.34|99.46	100.0|100.0	78.34|99.46	78.52|99.5	95.57
GAPVD1	100.0|100.0	100.0|100.0	100.0|100.0	100.0|100.0	100.0|100.0	100.0|100.0	100.0|100.0	100.0|100.0	100.0|100.0	100.0|100.0	100
CCL20	100.0|100.0	100.0|100.0	93.81|89.22	100.0|100.0	98.97|100.0	94.85|90.2	98.97|100.0	90.62|85.29	100.0|100.0	88.24|93.75	96.2
KLHL33	44.15|30.13	48.94|23.14	48.94|23.2	48.94|20.79	100.0|70.69	100.0|70.87	100.0|63.5	99.75|100.0	100.0|90.28	99.62|89.27	68.61
VEGFD	100.0|100.0	100.0|100.0	100.0|100.0	100.0|100.0	100.0|100.0	100.0|100.0	100.0|100.0	100.0|100.0	100.0|100.0	100.0|100.0	100
STON2	100.0|97.58	100.0|97.58	99.0|99.55	74.09|96.26	100.0|100.0	97.37|100.0	73.0|100.0	97.37|100.0	73.0|100.0	74.61|96.4	93.79
PHACTR4	96.45|99.72	97.4|97.14	96.45|100.0	98.5|100.0	99.01|95.5	100.0|100.0	100.0|100.0	95.64|99.72	97.28|99.44	100.0|100.0	98.61
EEFSEC	82.28|100.0	82.51|100.0	82.63|100.0	31.74|64.79	95.65|99.66	95.81|100.0	43.16|65.53	100.0|100.0	44.97|65.53	46.14|65.77	78.31
RASL11B	100.0|100.0	100.0|100.0	100.0|100.0	100.0|73.26	100.0|100.0	100.0|100.0	100.0|72.67	100.0|100.0	100.0|72.67	100.0|72.67	94.56
IPO9	98.4|88.92	98.4|94.81	98.4|94.9	98.4|94.81	93.78|100.0	93.78|100.0	93.78|100.0	100.0|100.0	100.0|100.0	100.0|100.0	97.42
DUSP1	100.0|100.0	100.0|100.0	100.0|100.0	100.0|100.0	100.0|100.0	100.0|100.0	100.0|100.0	100.0|100.0	100.0|100.0	100.0|100.0	100
TNP2	34.62|34.35	35.38|35.11	30.77|34.19	33.85|28.39	35.88|35.88	31.3|35.04	32.82|27.74	31.3|35.04	33.59|28.39	NA	32.98
KCTD21	100.0|100.0	100.0|95.94	100.0|100.0	100.0|100.0	100.0|95.94	100.0|100.0	100.0|100.0	95.94|100.0	95.94|100.0	100.0|100.0	99.19
PHKG2	100.0|100.0	100.0|100.0	99.26|99.26	100.0|100.0	100.0|100.0	99.26|99.26	100.0|100.0	99.26|99.26	100.0|100.0	100.0|99.27	99.74
STAT3	96.47|99.35	96.47|99.35	96.47|99.35	96.47|99.35	100.0|100.0	100.0|100.0	100.0|100.0	100.0|100.0	100.0|100.0	100.0|100.0	99.16
KAT6B	100.0|100.0	100.0|100.0	100.0|100.0	90.1|100.0	100.0|100.0	100.0|100.0	90.02|100.0	100.0|100.0	90.05|100.0	90.02|100.0	98.01
LOC100472091	100.0|100.0	100.0|99.11	100.0|100.0	100.0|100.0	100.0|99.11	100.0|100.0	100.0|100.0	99.11|100.0	99.11|100.0	100.0|100.0	99.82
KIF27	100.0|100.0	100.0|100.0	99.5|99.64	34.81|100.0	100.0|100.0	99.43|99.78	34.67|99.79	99.29|99.78	34.69|100.0	34.86|100.0	86.81
SLC26A1	79.15|100.0	79.15|100.0	80.61|99.86	51.35|100.0	100.0|100.0	100.0|98.19	65.01|100.0	100.0|98.19	65.2|100.0	63.61|100.0	89.02
KASH5	100.0|100.0	100.0|100.0	100.0|90.43	79.15|94.51	100.0|100.0	100.0|90.43	79.41|95.99	100.0|97.38	74.76|96.84	61.73|84.39	92.25
SMPX	97.73|100.0	97.73|100.0	97.73|100.0	82.95|86.9	100.0|100.0	100.0|100.0	84.88|86.9	100.0|100.0	84.88|86.9	85.88|86.9	93.97
SYS1	100.0|100.0	100.0|100.0	100.0|100.0	100.0|56.32	100.0|100.0	100.0|100.0	100.0|56.32	100.0|100.0	100.0|56.32	100.0|56.32	91.26
SAMD7	89.11|90.32	100.0|100.0	100.0|100.0	100.0|98.9	91.22|90.0	90.77|90.56	91.67|89.45	100.0|100.0	100.0|98.9	100.0|100.0	96.05
PRIM1	79.46|35.08	79.46|35.08	79.46|35.17	79.46|35.08	100.0|100.0	100.0|100.0	100.0|100.0	100.0|100.0	100.0|100.0	100.0|100.0	82.91
KLRD1	100.0|100.0	100.0|100.0	100.0|98.48	87.15|100.0	100.0|100.0	100.0|98.48	87.15|100.0	100.0|98.48	87.15|100.0	86.87|100.0	97.19
MYLK2	100.0|90.7	79.81|79.94	75.39|77.98	100.0|91.35	72.25|79.78	70.39|80.26	100.0|100.0	77.73|80.26	79.78|72.77	80.26|70.89	82.98
ASB15	84.73|100.0	84.73|100.0	84.01|100.0	84.73|100.0	100.0|100.0	99.15|100.0	100.0|100.0	99.15|100.0	100.0|100.0	100.0|99.15	96.78
DCK	93.7|97.31	93.7|97.31	93.7|97.31	93.7|69.7	100.0|100.0	100.0|100.0	100.0|71.63	100.0|100.0	100.0|71.63	100.0|71.63	92.57
RNF151	99.59|99.59	100.0|100.0	96.31|98.33	72.54|99.44	100.0|99.59	95.9|97.91	70.08|96.07	93.88|96.23	69.8|96.07	74.48|100.0	92.79
EPHX2	100.0|100.0	100.0|100.0	100.0|100.0	88.13|100.0	100.0|100.0	100.0|100.0	88.29|100.0	100.0|100.0	88.29|100.0	88.45|100.0	97.66
DCAF17	97.03|100.0	97.03|100.0	96.47|100.0	97.03|80.43	100.0|100.0	99.43|100.0	100.0|80.43	99.43|100.0	100.0|80.43	100.0|79.97	95.38
ADD1	98.42|100.0	97.45|100.0	97.45|100.0	97.45|100.0	100.0|100.0	96.13|100.0	100.0|100.0	100.0|100.0	100.0|100.0	100.0|100.0	99.35
GP2	100.0|100.0	100.0|100.0	90.37|84.81	100.0|98.9	100.0|100.0	90.94|85.35	100.0|98.9	90.37|84.81	100.0|98.9	85.9|87.48	94.84
MMP21	61.4|100.0	82.37|100.0	82.98|96.13	62.16|99.03	98.76|79.96	100.0|71.13	100.0|97.82	100.0|100.0	79.96|96.61	72.18|99.27	88.99
PCSK4	98.38|94.91	92.15|92.03	84.57|95.42	84.44|80.62	100.0|100.0	85.25|99.69	100.0|99.48	86.49|97.71	86.49|82.69	98.63|83.46	92.12
C12H16orf86	100.0|100.0	100.0|100.0	100.0|100.0	100.0|100.0	100.0|100.0	100.0|100.0	100.0|100.0	100.0|100.0	100.0|100.0	100.0|100.0	100
SMC3	98.11|98.27	98.11|98.27	98.11|98.27	98.11|98.27	100.0|100.0	100.0|100.0	100.0|100.0	100.0|100.0	100.0|100.0	100.0|100.0	99.28
PM20D2	61.17|65.13	61.17|65.28	60.74|64.97	61.17|65.13	100.0|100.0	99.54|100.0	100.0|100.0	99.54|99.77	100.0|100.0	100.0|99.54	85.16
NWD2	100.0|100.0	100.0|100.0	100.0|100.0	91.91|100.0	100.0|100.0	100.0|100.0	91.91|100.0	100.0|100.0	91.91|100.0	91.91|100.0	98.38
ITK	100.0|100.0	100.0|100.0	100.0|100.0	88.87|98.39	100.0|100.0	100.0|100.0	88.87|98.39	100.0|100.0	88.87|98.39	88.16|98.39	97.42
WIPF2	100.0|100.0	100.0|100.0	100.0|100.0	100.0|100.0	100.0|100.0	100.0|100.0	100.0|100.0	100.0|100.0	100.0|100.0	100.0|100.0	100
IPP	59.76|56.93	100.0|100.0	100.0|100.0	100.0|100.0	56.93|59.76	56.93|59.76	56.93|59.76	100.0|100.0	100.0|100.0	100.0|100.0	83.34
TBCK	95.65|95.97	95.65|95.97	95.65|95.97	66.18|97.21	100.0|100.0	100.0|100.0	66.41|97.21	100.0|100.0	66.41|97.21	66.41|97.21	91.46
DRP2	95.76|99.06	95.76|99.06	90.81|91.64	95.76|99.06	100.0|100.0	96.03|93.68	100.0|100.0	96.03|93.68	100.0|100.0	93.68|96.03	96.8
CREB5	49.64|99.64	90.94|100.0	91.85|99.8	49.64|83.79	100.0|54.78	99.64|53.94	100.0|84.1	100.0|98.82	54.78|84.1	53.94|83.79	81.66
TGFB2	100.0|100.0	100.0|100.0	100.0|100.0	62.9|100.0	100.0|100.0	100.0|100.0	67.15|100.0	100.0|100.0	62.9|100.0	62.9|100.0	92.79
MFSD1	100.0|100.0	100.0|100.0	100.0|100.0	100.0|82.39	100.0|100.0	100.0|100.0	100.0|82.39	100.0|100.0	100.0|82.39	100.0|82.39	96.48
LARS2	94.92|100.0	89.94|100.0	89.94|100.0	63.35|100.0	100.0|100.0	100.0|100.0	71.98|100.0	100.0|100.0	70.43|100.0	70.51|100.0	92.55
SLC44A5	99.58|99.86	99.31|96.23	96.94|96.81	81.81|99.83	99.16|95.83	96.38|95.98	82.17|100.0	93.94|96.81	79.27|99.83	80.72|98.64	94.46
WDR74	100.0|99.48	100.0|99.74	100.0|99.74	100.0|99.48	99.74|99.74	100.0|100.0	100.0|100.0	99.74|100.0	99.74|99.74	100.0|100.0	99.86
MOGAT2	79.95|100.0	79.71|100.0	79.71|100.0	79.71|100.0	99.7|100.0	99.7|100.0	99.7|100.0	100.0|100.0	100.0|100.0	100.0|100.0	95.91
GALNT12	87.89|93.38	87.89|92.36	100.0|100.0	87.89|93.73	100.0|99.82	99.82|94.27	94.49|94.83	99.82|95.31	98.18|99.63	92.36|98.15	95.49
ATAD1	77.11|98.89	77.75|94.49	77.11|98.89	77.11|98.89	100.0|94.75	100.0|100.0	100.0|100.0	94.75|100.0	94.75|100.0	100.0|100.0	94.22
UROC1	95.1|96.55	94.42|100.0	96.6|100.0	98.1|100.0	95.86|100.0	98.07|100.0	99.59|100.0	100.0|100.0	100.0|100.0	100.0|100.0	98.71
JCAD	100.0|100.0	99.71|96.66	100.0|100.0	100.0|100.0	100.0|96.66	100.0|100.0	100.0|100.0	97.37|100.0	97.09|100.0	100.0|100.0	99.37
TAF1D	95.56|88.43	94.76|97.92	92.74|71.43	85.08|82.42	86.19|96.25	83.58|69.57	77.24|80.86	93.75|69.88	85.83|80.47	75.78|95.31	85.15
CCDC180	100.0|100.0	100.0|100.0	100.0|100.0	74.17|92.73	100.0|100.0	100.0|98.86	73.81|94.76	99.94|100.0	71.92|95.7	73.26|95.31	93.52
LGI4	100.0|100.0	100.0|100.0	100.0|100.0	73.78|93.81	100.0|100.0	100.0|100.0	73.37|93.81	100.0|100.0	73.37|93.81	73.37|93.81	93.46
LRRC8B	75.09|78.36	74.97|78.33	75.33|78.7	75.09|78.36	100.0|100.0	100.0|100.0	100.0|100.0	100.0|100.0	100.0|100.0	100.0|100.0	90.71
SQOR	100.0|100.0	100.0|100.0	100.0|100.0	100.0|100.0	100.0|100.0	100.0|100.0	100.0|100.0	100.0|100.0	100.0|100.0	100.0|100.0	100
XPO5	50.78|100.0	89.22|100.0	89.52|100.0	98.74|99.33	100.0|56.92	100.0|57.06	100.0|51.38	100.0|100.0	100.0|90.05	100.0|90.05	88.65
RETREG3	100.0|100.0	100.0|93.39	100.0|100.0	100.0|91.19	100.0|93.39	100.0|100.0	100.0|91.19	93.39|100.0	99.2|96.87	100.0|91.19	97.49
ATF1	56.64|84.08	61.54|85.16	61.54|98.14	30.54|74.01	100.0|93.23	77.16|82.9	61.94|100.0	100.0|100.0	57.1|100.0	65.8|100.0	79.49
MUC19	99.49|86.36	98.98|65.67	55.85|91.47	99.66|66.69	100.0|78.81	48.48|91.47	99.93|77.03	37.05|91.47	89.12|89.89	91.33|37.31	79.8
TMC1	85.66|85.55	85.79|100.0	86.18|86.53	85.66|85.21	85.55|100.0	85.94|86.39	85.41|85.08	100.0|86.53	100.0|85.21	86.39|85.6	88.63
LOC100477744	98.63|100.0	98.63|100.0	98.63|100.0	98.63|100.0	100.0|100.0	100.0|100.0	100.0|100.0	100.0|100.0	100.0|100.0	100.0|100.0	99.73
ITFG1	81.57|100.0	100.0|100.0	99.67|100.0	12.07|100.0	100.0|81.51	100.0|81.64	14.86|100.0	99.67|99.84	12.11|100.0	12.13|100.0	79.75
TAGLN3	100.0|88.44	100.0|100.0	100.0|100.0	100.0|100.0	88.44|100.0	88.44|100.0	88.44|100.0	100.0|100.0	100.0|100.0	100.0|100.0	97.69
MLXIPL	100.0|100.0	100.0|100.0	100.0|100.0	100.0|100.0	100.0|100.0	100.0|100.0	100.0|100.0	100.0|100.0	100.0|100.0	100.0|100.0	100
MUC1	44.32|42.5	41.71|58.79	42.09|35.82	44.32|37.9	6.96|10.24	40.0|35.5	42.32|37.74	58.79|35.5	58.79|35.67	36.45|36.62	39.1
PROSER3	49.74|16.03	93.85|25.85	82.05|24.24	93.85|38.12	100.0|90.82	100.0|96.52	100.0|100.0	100.0|100.0	100.0|100.0	100.0|100.0	80.55
IL15RA	100.0|92.47	100.0|93.06	32.67|31.18	25.9|30.52	91.76|88.89	82.08|87.07	58.78|77.0	31.6|34.6	53.12|71.83	33.08|40.85	62.82
MILR1	100.0|93.73	96.49|89.19	97.95|100.0	86.84|74.25	93.46|92.7	94.55|100.0	80.93|74.25	88.92|100.0	80.27|74.25	100.0|72.5	89.51
ATMIN	83.66|100.0	88.3|92.7	90.61|95.6	82.73|100.0	100.0|87.83	100.0|88.26	98.89|100.0	92.7|93.15	86.86|100.0	87.29|100.0	93.43
APLF	100.0|97.9	100.0|100.0	90.39|92.38	100.0|100.0	97.71|99.81	87.79|92.18	97.9|99.81	89.67|92.18	100.0|100.0	92.38|89.69	95.99
ARHGAP44	81.06|86.82	100.0|100.0	100.0|100.0	98.03|100.0	100.0|92.43	86.17|80.34	98.81|100.0	100.0|100.0	97.96|100.0	98.03|100.0	95.98
GMCL1	71.08|82.28	84.5|96.96	84.12|84.92	84.5|84.98	99.56|98.7	99.56|86.83	99.56|86.5	100.0|100.0	100.0|100.0	100.0|99.62	92.18
ETHE1	100.0|100.0	100.0|100.0	100.0|100.0	100.0|100.0	100.0|100.0	100.0|100.0	100.0|100.0	100.0|100.0	100.0|100.0	100.0|100.0	100
TVP23B	100.0|100.0	100.0|100.0	100.0|100.0	74.4|100.0	100.0|100.0	100.0|100.0	68.78|100.0	100.0|100.0	70.37|100.0	68.78|100.0	94.12
ETV4	100.0|100.0	94.98|100.0	100.0|100.0	97.68|97.12	94.57|100.0	100.0|100.0	97.49|89.64	100.0|93.42	100.0|87.33	96.3|89.83	96.92
GRIN2C	100.0|100.0	71.04|91.21	100.0|100.0	45.3|91.81	78.09|91.74	100.0|100.0	50.68|93.98	91.21|69.49	58.69|92.64	44.31|91.81	83.1
LIMK2	75.42|91.2	75.54|99.22	75.54|99.22	76.25|99.22	91.34|99.22	91.34|99.22	92.78|99.84	100.0|100.0	100.0|99.38	100.0|99.38	93.21
IL17RD	100.0|83.31	100.0|80.6	100.0|81.03	100.0|87.87	98.46|95.25	99.02|95.66	94.81|100.0	100.0|100.0	91.72|100.0	92.14|100.0	94.99
OIT3	100.0|100.0	96.34|95.64	99.27|99.27	99.27|97.83	96.34|95.64	99.45|99.45	99.45|98.01	95.45|96.15	95.64|94.95	99.63|98.19	97.8
CDC25C	100.0|97.35	100.0|100.0	100.0|100.0	65.97|100.0	100.0|100.0	100.0|100.0	63.95|100.0	100.0|100.0	61.69|100.0	69.57|100.0	92.93
FTO	91.13|99.82	77.74|93.23	80.16|99.0	60.32|95.17	85.51|93.62	90.81|100.0	66.25|95.42	94.39|97.21	72.34|95.17	74.5|95.17	87.85
MRPL54	100.0|100.0	100.0|100.0	99.28|100.0	100.0|100.0	100.0|100.0	100.0|100.0	100.0|100.0	99.28|100.0	100.0|100.0	100.0|99.28	99.89
BCL2	93.53|100.0	100.0|100.0	100.0|100.0	34.91|66.94	92.27|73.46	100.0|93.22	39.13|66.94	100.0|100.0	31.15|66.94	34.32|66.94	77.99
SETD1B	88.65|97.98	100.0|98.55	100.0|99.24	75.93|100.0	97.86|87.04	97.08|86.95	84.87|100.0	99.85|100.0	75.54|100.0	76.57|100.0	93.31
RAB20	98.72|100.0	88.09|83.81	100.0|100.0	100.0|100.0	88.31|82.59	99.57|98.71	99.57|99.57	83.81|88.84	83.81|89.61	100.0|100.0	94.25
LY86	34.88|63.03	34.88|43.6	55.81|74.07	37.67|65.32	99.16|68.6	98.32|72.22	100.0|95.97	68.02|72.22	66.86|92.74	75.93|99.19	70.92
ABHD4	81.97|87.65	100.0|100.0	100.0|100.0	100.0|100.0	87.65|81.97	87.65|81.97	87.65|81.97	100.0|100.0	100.0|100.0	100.0|100.0	93.92
VPS53	100.0|100.0	100.0|100.0	100.0|100.0	80.65|100.0	100.0|100.0	100.0|100.0	80.65|100.0	100.0|100.0	80.65|100.0	80.65|100.0	96.13
TINAGL1	91.01|95.08	100.0|100.0	99.79|100.0	100.0|100.0	95.08|91.01	95.08|91.2	95.08|90.81	99.79|100.0	100.0|100.0	100.0|99.79	97.19
DDX6	100.0|100.0	100.0|100.0	100.0|100.0	100.0|100.0	100.0|100.0	100.0|100.0	100.0|100.0	100.0|100.0	100.0|100.0	100.0|100.0	100
PCID2	97.32|100.0	97.07|86.33	100.0|100.0	80.24|100.0	99.23|83.95	99.49|97.24	82.05|100.0	83.95|96.99	68.76|99.06	79.7|99.38	92.54
FAM20B	100.0|100.0	100.0|100.0	100.0|100.0	100.0|100.0	100.0|100.0	100.0|100.0	100.0|100.0	100.0|100.0	100.0|100.0	100.0|100.0	100
MRPL3	85.44|89.37	83.79|87.64	84.07|87.93	85.16|82.67	100.0|100.0	99.71|99.71	100.0|100.0	99.71|99.71	100.0|100.0	100.0|99.73	94.23
GRWD1	100.0|100.0	100.0|100.0	100.0|100.0	87.27|100.0	100.0|100.0	100.0|100.0	85.91|100.0	100.0|100.0	85.91|100.0	86.1|100.0	97.26
LOC100465952	97.16|97.92	100.0|99.49	93.56|92.37	84.54|100.0	97.92|96.67	94.55|92.62	84.42|100.0	93.08|92.37	84.1|100.0	83.46|100.0	94.21
VAV1	100.0|100.0	100.0|100.0	100.0|100.0	100.0|100.0	100.0|100.0	100.0|100.0	100.0|100.0	100.0|100.0	100.0|100.0	100.0|100.0	100
LPCAT1	72.19|96.63	71.75|100.0	76.63|97.0	71.75|100.0	96.04|100.0	96.83|91.57	96.04|100.0	100.0|91.01	100.0|100.0	91.01|100.0	92.42
VPS37B	58.28|51.68	86.55|87.46	59.31|60.35	86.55|90.29	51.07|58.19	50.76|58.25	49.54|58.27	100.0|100.0	100.0|100.0	100.0|100.0	75.33
SYT12	94.18|100.0	94.18|100.0	94.18|100.0	94.18|100.0	100.0|100.0	100.0|100.0	100.0|100.0	100.0|100.0	100.0|100.0	100.0|100.0	98.84
POLDIP3	100.0|100.0	100.0|100.0	100.0|100.0	100.0|100.0	100.0|100.0	100.0|100.0	100.0|100.0	100.0|100.0	100.0|100.0	100.0|100.0	100
SPP2	99.5|97.54	99.5|100.0	94.47|92.61	70.85|65.89	100.0|100.0	96.06|96.06	95.57|90.65	86.1|79.31	78.61|68.69	69.46|65.89	87.34
RNF169	81.74|95.88	90.31|95.97	90.31|92.65	76.12|100.0	88.3|80.0	89.13|77.95	88.3|99.26	95.82|92.51	80.15|99.44	78.1|100.0	89.6
ZNHIT6	93.83|100.0	94.61|100.0	94.61|100.0	93.83|100.0	100.0|100.0	100.0|100.0	100.0|100.0	100.0|100.0	100.0|100.0	56.96|56.34	94.51
DPP8	100.0|100.0	100.0|100.0	99.33|100.0	100.0|100.0	100.0|100.0	99.33|100.0	100.0|100.0	99.33|100.0	100.0|100.0	100.0|99.33	99.87
NEK10	100.0|100.0	100.0|100.0	100.0|100.0	37.2|100.0	100.0|100.0	100.0|100.0	37.17|100.0	100.0|100.0	37.17|100.0	39.1|100.0	87.53
AAAS	100.0|100.0	100.0|100.0	99.83|100.0	100.0|100.0	100.0|100.0	99.82|99.82	100.0|100.0	99.82|99.82	100.0|100.0	99.82|99.82	99.94
FCER2	93.44|87.69	100.0|100.0	97.7|90.03	99.67|100.0	100.0|95.09	96.62|94.86	87.69|93.75	98.45|100.0	100.0|100.0	90.03|98.03	96.15
MBNL2	100.0|100.0	89.26|90.65	89.26|90.65	74.94|89.6	93.35|87.53	93.35|87.53	77.29|85.32	100.0|100.0	84.68|99.69	84.68|99.69	90.87
SHBG	100.0|100.0	100.0|100.0	93.83|94.29	76.54|100.0	100.0|100.0	93.81|94.04	76.49|100.0	94.28|94.04	76.87|100.0	76.67|100.0	93.54
NME7	87.5|94.0	88.3|78.67	99.73|94.94	66.76|79.43	94.0|77.96	96.57|85.57	73.14|81.01	78.44|83.8	59.48|79.43	63.8|79.75	82.11
PLA2G12B	100.0|100.0	100.0|100.0	100.0|100.0	100.0|100.0	100.0|100.0	100.0|100.0	100.0|100.0	100.0|100.0	100.0|100.0	100.0|100.0	100
ST8SIA6	63.19|94.07	65.46|99.71	72.11|95.48	46.87|100.0	94.07|96.24	94.07|83.67	69.77|100.0	99.71|86.68	71.39|100.0	62.06|100.0	84.73
FBXO39	100.0|100.0	100.0|100.0	100.0|100.0	100.0|100.0	100.0|100.0	100.0|100.0	100.0|100.0	100.0|100.0	100.0|100.0	100.0|100.0	100
CLDN16	97.57|94.88	96.76|77.85	95.14|100.0	95.14|100.0	100.0|82.74	92.52|100.0	92.52|100.0	76.55|100.0	76.55|100.0	100.0|100.0	93.91
ELOVL5	100.0|84.94	100.0|100.0	100.0|100.0	100.0|100.0	84.94|100.0	84.94|100.0	84.66|100.0	100.0|100.0	100.0|100.0	100.0|100.0	96.97
ARHGEF2	79.73|100.0	82.5|98.5	98.16|99.07	88.69|100.0	100.0|99.5	100.0|81.74	84.71|73.12	100.0|84.62	87.3|82.91	89.6|100.0	91.51
CEP97	100.0|100.0	100.0|100.0	100.0|100.0	99.41|100.0	100.0|100.0	100.0|100.0	98.48|100.0	100.0|100.0	98.49|100.0	98.6|100.0	99.75
SSTR3	100.0|100.0	100.0|100.0	100.0|100.0	100.0|100.0	100.0|100.0	100.0|99.3	100.0|100.0	100.0|100.0	100.0|100.0	99.07|100.0	99.92
FCGRT	100.0|100.0	93.79|88.3	100.0|97.56	100.0|84.58	93.8|88.56	100.0|96.48	100.0|84.58	92.02|93.77	90.96|79.91	96.48|83.18	93.2
CDCA3	100.0|100.0	100.0|100.0	97.76|98.5	100.0|100.0	100.0|100.0	97.76|98.5	100.0|100.0	97.76|98.5	100.0|100.0	98.5|97.76	99.25
BDH1	63.78|60.06	63.78|60.06	63.78|60.06	63.78|60.06	100.0|100.0	100.0|100.0	100.0|100.0	100.0|100.0	100.0|100.0	100.0|100.0	84.77
SHC4	99.05|100.0	100.0|100.0	100.0|100.0	65.19|100.0	100.0|99.1	99.84|99.52	64.9|98.3	99.4|100.0	67.22|100.0	65.81|100.0	92.92
CTCFL	100.0|100.0	100.0|100.0	44.95|45.44	56.92|94.57	100.0|100.0	45.31|44.81	58.19|94.57	44.25|44.18	12.28|20.16	13.21|21.71	62.03
PIGC	99.66|99.33	100.0|100.0	100.0|100.0	100.0|100.0	98.99|99.33	99.33|99.66	99.33|99.66	100.0|100.0	100.0|100.0	100.0|100.0	99.76
AHI1	98.3|98.89	98.39|97.39	88.2|99.24	80.22|98.34	100.0|98.57	89.92|100.0	80.53|98.13	88.99|100.0	79.24|98.13	85.67|93.34	93.57
TMEM161B	72.98|92.61	72.98|92.61	72.98|92.61	72.98|94.75	100.0|100.0	100.0|100.0	97.74|100.0	100.0|100.0	97.74|100.0	97.74|100.0	92.89
GEMIN4	88.69|100.0	88.69|100.0	88.69|100.0	13.23|90.29	100.0|100.0	100.0|100.0	14.95|90.29	100.0|100.0	14.95|90.29	14.93|90.29	79.26
BLNK	100.0|100.0	100.0|100.0	100.0|100.0	100.0|100.0	100.0|100.0	100.0|100.0	100.0|100.0	100.0|100.0	100.0|100.0	100.0|100.0	100
HELB	95.15|100.0	92.07|95.17	94.89|100.0	87.14|100.0	96.94|95.36	100.0|100.0	92.13|100.0	95.08|97.21	90.62|100.0	89.29|97.76	95.94
NEDD9	95.85|99.64	96.08|100.0	96.08|100.0	95.39|100.0	99.52|99.64	99.64|99.88	99.28|100.0	100.0|100.0	100.0|100.0	99.4|100.0	99.02
LINGO2	100.0|100.0	100.0|100.0	100.0|100.0	96.53|100.0	100.0|100.0	100.0|100.0	96.53|100.0	100.0|100.0	96.53|100.0	96.53|100.0	99.31
ADARB2	97.93|99.72	100.0|100.0	97.66|95.03	56.41|98.79	99.72|95.3	99.3|94.9	57.16|98.31	95.03|95.03	54.63|98.31	54.9|98.79	89.35
CAMP	92.44|89.83	98.84|100.0	100.0|100.0	98.84|99.42	89.83|93.53	88.7|91.28	93.22|96.49	100.0|100.0	100.0|99.42	100.0|100.0	96.59
DNASE1L1	96.61|94.68	96.61|94.68	95.93|90.13	96.95|96.3	100.0|100.0	93.69|89.81	100.0|100.0	93.69|89.81	100.0|100.0	90.76|95.96	95.78
FAM53B	82.26|83.8	85.94|87.56	92.17|94.79	61.52|87.54	100.0|100.0	100.0|100.0	62.68|87.54	100.0|100.0	62.68|87.54	61.61|85.25	86.14
RBM33	99.09|100.0	100.0|100.0	100.0|100.0	73.8|98.78	100.0|99.01	100.0|99.27	75.82|97.78	100.0|100.0	73.51|98.56	74.49|100.0	94.51
CEP20	100.0|100.0	100.0|100.0	100.0|100.0	85.63|94.3	100.0|100.0	100.0|100.0	86.21|94.94	100.0|100.0	85.63|94.3	83.91|92.41	95.87
ATP1B3	92.42|96.44	100.0|94.29	100.0|94.96	84.47|100.0	96.44|87.14	96.44|87.77	88.14|100.0	100.0|100.0	79.64|100.0	80.22|100.0	93.92
ZNF202	65.43|65.43	65.43|65.53	65.28|65.99	65.43|65.43	65.43|65.53	65.28|65.99	65.43|65.43	65.22|65.83	65.53|65.43	65.99|65.28	65.52
DNAJC30	100.0|100.0	100.0|100.0	99.56|100.0	100.0|100.0	100.0|100.0	99.55|100.0	100.0|100.0	99.56|100.0	100.0|100.0	100.0|99.56	99.91
MEDAG	98.68|98.68	71.29|58.38	99.67|99.67	82.84|99.21	71.29|58.38	100.0|100.0	82.84|99.21	58.38|71.29	58.38|85.38	82.84|99.21	83.78
JMJD6	74.29|94.2	74.29|94.2	74.29|96.77	68.0|76.45	100.0|100.0	97.34|100.0	86.23|76.45	97.34|100.0	86.23|76.45	88.59|76.45	86.88
KCTD3	99.1|99.23	99.1|94.96	99.23|94.97	99.1|99.23	100.0|95.7	100.0|95.71	100.0|100.0	100.0|100.0	95.7|100.0	95.71|100.0	98.39
SCRN1	68.72|100.0	94.52|100.0	94.52|100.0	94.52|100.0	100.0|72.71	100.0|72.71	100.0|72.71	100.0|100.0	100.0|100.0	100.0|100.0	93.52
TEKT5	99.64|100.0	100.0|100.0	100.0|100.0	99.64|100.0	99.59|99.8	99.59|87.43	100.0|100.0	100.0|87.79	99.8|99.59	87.43|99.59	97.99
MTMR4	100.0|100.0	100.0|100.0	100.0|100.0	100.0|100.0	100.0|98.76	100.0|100.0	100.0|98.76	98.76|100.0	100.0|100.0	100.0|98.76	99.75
TAF13	100.0|100.0	100.0|100.0	100.0|100.0	100.0|100.0	100.0|100.0	100.0|100.0	100.0|100.0	100.0|100.0	100.0|100.0	100.0|100.0	100
CAVIN1	100.0|100.0	100.0|100.0	100.0|100.0	100.0|87.25	100.0|100.0	100.0|100.0	100.0|87.25	100.0|100.0	100.0|87.25	100.0|87.7	97.47
PFN4	100.0|100.0	100.0|100.0	100.0|100.0	100.0|100.0	100.0|100.0	100.0|100.0	100.0|100.0	100.0|100.0	100.0|100.0	100.0|100.0	100
AGBL5	91.52|99.26	100.0|100.0	100.0|100.0	100.0|100.0	99.14|91.4	98.28|90.41	98.28|90.41	100.0|100.0	100.0|100.0	100.0|100.0	97.94
MGAT4C	99.18|95.82	99.38|88.44	98.56|100.0	98.97|98.36	98.8|91.01	95.02|99.79	95.82|98.57	87.71|100.0	88.07|98.36	99.79|97.75	96.47
PADI6	99.71|100.0	94.42|94.56	98.28|100.0	94.42|97.49	94.4|94.27	98.85|100.0	94.4|97.19	93.98|96.19	95.13|98.08	96.48|97.19	96.75
PKD2L2	100.0|100.0	100.0|100.0	100.0|99.84	100.0|99.84	100.0|100.0	99.52|100.0	100.0|99.68	100.0|100.0	100.0|100.0	100.0|99.2	99.9
PLPPR1	100.0|100.0	100.0|100.0	100.0|100.0	94.77|99.68	100.0|100.0	100.0|100.0	94.77|99.68	100.0|100.0	94.77|99.68	94.77|99.68	98.89
HCRT	59.23|70.0	100.0|100.0	100.0|100.0	100.0|100.0	70.0|58.78	70.0|59.23	70.0|58.78	100.0|100.0	100.0|100.0	100.0|100.0	85.8
RIT1	76.82|93.37	100.0|100.0	100.0|100.0	100.0|100.0	92.82|76.71	92.82|76.71	92.82|79.25	100.0|100.0	100.0|100.0	100.0|100.0	94.07
SMPDL3A	99.78|99.78	100.0|100.0	98.68|100.0	92.27|100.0	99.78|99.78	98.45|100.0	92.05|99.76	98.68|100.0	92.27|100.0	92.58|98.56	98.12
DDO	91.74|94.99	91.74|94.43	90.03|92.67	91.74|94.43	99.71|99.12	99.41|98.83	100.0|100.0	100.0|100.0	100.0|100.0	100.0|100.0	96.94
NISCH	83.41|99.46	99.41|100.0	100.0|100.0	100.0|100.0	97.6|83.09	100.0|82.67	100.0|82.5	100.0|98.05	100.0|98.49	100.0|100.0	96.23
FGF8	95.07|78.14	89.66|78.79	92.12|69.78	95.07|73.95	95.55|100.0	100.0|98.88	100.0|94.64	100.0|98.13	100.0|90.42	100.0|100.0	92.51
LDOC1	89.8|89.19	89.8|90.41	89.12|86.75	89.8|90.41	89.19|90.41	88.51|86.75	89.19|90.41	89.73|86.75	90.41|90.41	86.75|89.73	89.18
ERCC8	89.04|98.48	89.95|98.5	89.27|98.49	89.04|98.48	100.0|100.0	100.0|100.0	100.0|100.0	100.0|100.0	100.0|100.0	100.0|100.0	97.56
HINFP	99.23|96.08	100.0|96.65	96.72|99.8	100.0|100.0	99.44|99.26	93.47|99.6	97.57|99.24	92.36|98.61	98.14|100.0	100.0|95.83	98.1
SHISAL2B	100.0|100.0	100.0|100.0	96.89|98.73	100.0|100.0	100.0|100.0	96.89|98.73	100.0|100.0	96.89|98.73	100.0|100.0	98.73|96.89	99.12
TERB2	100.0|100.0	100.0|100.0	99.55|100.0	100.0|100.0	100.0|100.0	99.55|100.0	100.0|100.0	99.55|100.0	100.0|100.0	100.0|99.55	99.91
SPRED1	97.08|97.52	97.08|97.52	97.53|97.75	100.0|100.0	100.0|100.0	100.0|100.0	97.52|97.08	100.0|100.0	97.52|97.08	97.75|97.53	98.45
GGH	100.0|100.0	100.0|100.0	100.0|100.0	100.0|100.0	100.0|100.0	100.0|100.0	100.0|100.0	100.0|100.0	100.0|100.0	100.0|100.0	100
FBXO43	84.93|100.0	99.85|95.98	97.91|100.0	99.4|100.0	100.0|81.49	100.0|88.92	100.0|85.41	93.54|100.0	95.41|100.0	100.0|97.74	96.03
B4GALT1	96.99|100.0	100.0|100.0	100.0|100.0	100.0|100.0	100.0|97.24	100.0|96.99	100.0|96.75	100.0|99.75	100.0|100.0	100.0|100.0	99.39
TPR	100.0|96.88	99.49|95.92	100.0|97.16	100.0|96.88	99.43|99.02	100.0|100.0	100.0|100.0	99.02|99.75	99.02|99.43	100.0|100.0	99.1
GADD45GIP1	83.56|82.43	83.56|82.43	83.56|82.43	82.19|68.7	82.43|82.43	82.88|82.88	81.53|69.08	82.43|82.43	81.08|68.7	80.18|67.94	79.64
HDAC10	70.16|100.0	70.69|100.0	70.58|100.0	68.36|91.5	100.0|99.25	100.0|99.85	97.13|91.22	100.0|100.0	96.71|91.5	97.3|91.78	91.8
TMC6	100.0|100.0	100.0|91.61	100.0|98.4	54.57|98.58	100.0|92.18	100.0|99.51	44.25|78.07	91.61|99.75	47.39|98.58	51.23|97.88	87.18
CMTM6	100.0|99.45	100.0|99.45	100.0|99.45	99.45|83.03	100.0|100.0	100.0|100.0	100.0|83.94	100.0|100.0	100.0|83.94	100.0|83.94	96.63
FLAD1	100.0|100.0	100.0|99.8	100.0|94.79	100.0|100.0	100.0|99.8	100.0|94.79	100.0|100.0	100.0|95.95	99.8|100.0	94.79|100.0	98.99
LOC100467394	100.0|100.0	100.0|87.28	100.0|100.0	100.0|100.0	100.0|87.28	100.0|100.0	100.0|100.0	87.28|100.0	87.28|100.0	100.0|100.0	97.46
ETV3L	51.69|59.93	97.75|81.31	100.0|100.0	100.0|100.0	63.19|45.33	65.47|56.46	61.56|52.21	82.01|98.6	85.28|100.0	100.0|100.0	80.04
FOXF1	90.68|100.0	100.0|100.0	98.31|92.06	98.31|92.31	100.0|90.68	100.0|84.92	100.0|85.15	98.31|92.06	98.31|92.31	92.06|92.31	94.89
PRRT1B	87.11|75.08	68.36|55.91	69.14|71.37	39.45|70.63	72.05|68.37	55.56|66.53	34.34|71.33	40.89|51.61	16.61|36.36	39.11|67.83	57.88
POLR2I	100.0|100.0	100.0|100.0	100.0|100.0	100.0|100.0	100.0|100.0	100.0|100.0	100.0|100.0	100.0|100.0	100.0|100.0	100.0|100.0	100
TTC16	78.98|79.08	79.45|80.37	75.52|79.37	78.75|48.78	100.0|100.0	74.34|78.03	99.54|61.59	76.4|79.37	100.0|61.23	79.73|47.0	77.88
TGFBR2	79.32|100.0	95.37|91.14	95.37|90.37	94.83|100.0	100.0|75.81	100.0|75.17	100.0|83.65	91.48|90.71	90.63|100.0	89.86|100.0	92.19
PRAG1	80.71|90.45	98.99|96.61	99.93|100.0	98.99|91.58	94.66|82.44	94.09|84.63	94.66|78.14	99.58|100.0	100.0|95.12	100.0|93.72	93.72
CD44	82.65|100.0	82.42|91.59	82.54|90.9	82.77|96.87	100.0|100.0	100.0|100.0	100.0|100.0	100.0|100.0	97.41|100.0	98.33|100.0	95.27
NOP2	100.0|100.0	100.0|100.0	100.0|100.0	93.15|100.0	100.0|100.0	100.0|100.0	92.89|100.0	100.0|100.0	91.99|100.0	95.59|100.0	98.68
ELK1	84.47|100.0	88.74|98.28	84.47|100.0	89.13|94.64	100.0|93.55	100.0|100.0	100.0|89.9	93.55|100.0	98.49|94.43	100.0|89.9	94.98
TTLL3	90.3|91.23	93.26|84.66	92.47|87.28	75.57|80.54	100.0|93.06	100.0|95.69	88.24|93.07	94.82|98.6	81.24|95.38	81.9|92.46	90.49
CLN8	100.0|100.0	100.0|100.0	99.31|99.31	100.0|100.0	100.0|100.0	99.31|99.31	100.0|100.0	99.31|99.31	100.0|100.0	99.31|99.31	99.72
SLC44A3	72.82|92.02	75.36|95.39	75.49|94.82	55.1|89.19	100.0|100.0	100.0|99.39	75.77|97.05	100.0|99.39	75.73|96.86	75.3|97.05	88.34
FHL3	99.31|95.68	96.55|100.0	99.66|100.0	99.66|100.0	92.69|99.64	95.68|99.65	95.02|98.96	100.0|100.0	100.0|100.0	100.0|100.0	98.63
VWC2	67.0|49.45	48.77|32.67	67.0|41.98	67.0|52.31	92.36|83.83	100.0|85.19	77.45|81.92	100.0|93.52	70.3|81.92	65.74|81.92	72.02
USP45	100.0|94.98	100.0|94.74	100.0|95.08	100.0|95.22	100.0|100.0	100.0|100.0	100.0|100.0	100.0|100.0	100.0|100.0	100.0|100.0	99
NUDT5	50.42|55.25	50.42|55.25	50.42|55.5	50.42|55.25	100.0|100.0	100.0|100.0	100.0|100.0	100.0|100.0	100.0|100.0	100.0|100.0	81.15
TESK1	89.01|97.86	11.52|10.35	11.52|10.37	11.52|8.99	100.0|81.69	100.0|82.62	100.0|70.95	100.0|100.0	100.0|86.86	100.0|87.55	68.04
ADD2	100.0|100.0	73.55|94.99	100.0|100.0	100.0|100.0	74.83|96.78	100.0|100.0	100.0|100.0	96.78|74.62	96.78|74.83	100.0|100.0	94.16
PAFAH1B3	77.0|100.0	78.67|98.33	76.33|98.71	77.0|100.0	100.0|96.25	99.13|98.71	100.0|100.0	96.25|99.57	96.25|100.0	99.57|100.0	94.59
LLPH	46.13|100.0	46.86|100.0	38.01|79.23	49.45|100.0	100.0|98.43	80.8|77.69	100.0|98.51	81.1|79.23	100.0|100.0	80.0|77.61	81.65
TSPAN14	72.78|100.0	65.5|97.98	72.78|100.0	72.78|100.0	90.0|97.98	100.0|100.0	100.0|100.0	97.98|90.0	97.98|90.0	100.0|100.0	92.29
CNPY4	100.0|97.7	100.0|100.0	100.0|98.78	100.0|100.0	98.08|100.0	100.0|100.0	97.7|100.0	81.78|82.45	100.0|100.0	97.14|100.0	97.68
HNF4A	89.88|98.19	98.35|97.94	89.88|91.77	89.88|91.77	100.0|91.56	98.42|91.98	98.42|91.98	92.59|94.94	92.59|94.94	100.0|100.0	94.75
LOC100475597	100.0|100.0	100.0|99.07	99.69|99.69	100.0|99.38	100.0|99.07	97.81|97.81	100.0|99.38	98.76|99.69	99.38|99.38	97.5|96.59	99.16
USP4	100.0|100.0	100.0|100.0	100.0|100.0	100.0|89.06	100.0|100.0	100.0|100.0	100.0|89.06	100.0|100.0	100.0|89.06	100.0|89.06	97.81
HGFAC	90.87|100.0	98.34|100.0	92.25|100.0	88.38|100.0	83.84|78.68	100.0|100.0	95.73|100.0	79.83|85.45	82.98|95.24	96.32|100.0	93.4
MBP	94.86|100.0	94.86|95.73	80.66|100.0	87.61|95.39	100.0|100.0	100.0|100.0	100.0|100.0	100.0|100.0	92.68|100.0	88.0|72.37	95.11
SVOP	68.98|70.62	68.98|70.62	68.98|70.62	68.98|70.62	100.0|100.0	100.0|100.0	100.0|100.0	100.0|100.0	100.0|100.0	100.0|100.0	87.92
UBN1	95.49|98.94	98.3|98.89	95.57|98.85	96.93|99.04	100.0|100.0	100.0|100.0	100.0|100.0	100.0|100.0	100.0|100.0	100.0|100.0	99.1
KDM2B	92.98|99.16	93.06|99.62	92.98|99.24	86.54|94.6	99.31|99.69	100.0|100.0	92.29|94.6	99.69|99.39	92.72|94.68	92.36|94.6	95.88
LOC100481638	100.0|100.0	99.77|100.0	100.0|100.0	99.54|98.2	100.0|100.0	100.0|100.0	99.77|98.2	100.0|99.77	99.77|98.2	99.54|98.42	99.56
CDS2	77.53|100.0	85.37|100.0	77.53|100.0	74.22|93.83	100.0|100.0	100.0|100.0	95.73|93.83	100.0|100.0	96.32|100.0	95.95|93.83	94.21
GC	93.12|94.3	93.12|94.3	93.12|93.91	93.12|94.3	100.0|100.0	100.0|99.58	100.0|100.0	100.0|99.58	100.0|100.0	99.58|100.0	97.4
ZNF341	100.0|100.0	87.46|100.0	100.0|100.0	72.22|100.0	87.47|100.0	100.0|100.0	72.13|100.0	100.0|88.3	83.02|100.0	73.05|100.0	93.18
BTBD16	98.81|98.81	99.6|100.0	98.62|95.59	98.81|89.77	98.81|99.21	99.21|96.17	100.0|90.84	99.01|95.59	99.21|89.77	96.17|90.13	96.71
LOC100466967	100.0|100.0	100.0|100.0	100.0|100.0	100.0|100.0	100.0|100.0	100.0|100.0	100.0|100.0	100.0|100.0	100.0|100.0	100.0|100.0	100
PHF1	100.0|100.0	100.0|100.0	100.0|100.0	100.0|85.19	100.0|100.0	100.0|100.0	97.35|85.19	100.0|100.0	97.35|85.19	97.66|90.28	96.91
SLC46A1	100.0|100.0	100.0|100.0	100.0|100.0	100.0|100.0	100.0|100.0	100.0|100.0	100.0|100.0	100.0|100.0	100.0|100.0	100.0|100.0	100
SLC17A4	100.0|92.74	100.0|92.74	100.0|92.89	100.0|98.23	99.8|99.8	97.98|98.78	91.73|100.0	99.8|100.0	91.53|100.0	92.07|100.0	97.4
ELF4	100.0|100.0	100.0|100.0	100.0|100.0	100.0|100.0	100.0|100.0	100.0|100.0	100.0|100.0	100.0|100.0	100.0|100.0	100.0|100.0	100
LRRC36	100.0|100.0	100.0|100.0	100.0|100.0	100.0|100.0	100.0|100.0	100.0|100.0	100.0|100.0	100.0|100.0	100.0|100.0	100.0|100.0	100
USP43	90.9|100.0	100.0|100.0	93.76|92.84	91.44|100.0	100.0|92.37	100.0|90.28	100.0|99.5	96.45|96.02	92.81|100.0	90.9|100.0	96.36
EREG	95.0|94.41	61.25|100.0	94.38|93.21	94.38|95.57	60.87|100.0	98.76|98.15	98.76|100.0	100.0|60.49	100.0|62.03	97.53|100.0	90.24
DFFA	90.18|89.91	90.49|90.21	87.73|86.4	90.49|90.21	89.91|89.91	87.16|86.1	89.91|89.91	87.46|86.4	90.21|90.21	86.4|87.46	88.83
NPLOC4	98.05|99.34	84.55|100.0	98.05|99.18	99.35|94.44	85.67|100.0	99.84|99.67	99.51|93.35	100.0|85.53	100.0|80.37	99.84|93.82	95.53
STK16	100.0|100.0	100.0|100.0	100.0|100.0	100.0|100.0	100.0|100.0	100.0|100.0	100.0|100.0	100.0|100.0	100.0|100.0	100.0|100.0	100
SYK	27.61|91.04	91.99|100.0	91.99|100.0	91.99|100.0	100.0|33.39	100.0|33.7	100.0|33.39	100.0|100.0	100.0|100.0	100.0|100.0	84.76
MRPL38	100.0|100.0	100.0|100.0	100.0|100.0	100.0|100.0	100.0|100.0	100.0|100.0	100.0|100.0	100.0|100.0	100.0|100.0	100.0|100.0	100
ZNF169	25.76|29.69	23.22|28.36	42.54|34.34	32.37|56.34	26.76|28.36	35.16|24.62	14.06|21.24	31.26|20.66	14.91|21.24	28.32|61.06	30.01
SKAP1	100.0|100.0	96.42|94.85	100.0|100.0	73.0|100.0	96.42|94.85	100.0|100.0	73.0|100.0	96.21|100.0	71.82|100.0	76.06|100.0	93.63
FAM83D	100.0|94.2	100.0|99.83	100.0|100.0	100.0|100.0	94.2|99.83	94.52|100.0	94.2|100.0	100.0|100.0	99.83|100.0	100.0|100.0	98.83
SPAG1	100.0|58.81	100.0|59.21	100.0|58.49	83.22|92.31	100.0|100.0	100.0|100.0	39.89|91.56	100.0|100.0	39.4|91.32	39.4|88.09	82.09
POPDC2	62.23|56.15	62.23|55.52	62.23|54.18	62.23|56.15	92.18|91.16	94.69|91.37	100.0|100.0	100.0|100.0	91.16|92.18	91.37|94.69	80.49
NIF3L1	99.73|100.0	100.0|100.0	100.0|100.0	100.0|100.0	99.73|99.73	99.73|99.73	98.4|98.14	100.0|100.0	98.67|98.41	99.47|99.2	99.55
BAZ1A	97.62|99.35	100.0|100.0	100.0|100.0	62.36|100.0	99.35|97.62	99.48|97.88	63.53|100.0	100.0|100.0	62.36|100.0	63.28|100.0	92.14
SCN1B	91.56|99.54	91.56|99.54	86.5|94.04	86.92|68.67	100.0|100.0	94.04|94.04	94.5|68.67	100.0|100.0	94.5|68.67	95.41|69.33	89.87
ALCAM	100.0|100.0	100.0|100.0	100.0|100.0	93.14|100.0	100.0|100.0	100.0|100.0	93.14|100.0	100.0|100.0	93.14|100.0	93.14|100.0	98.63
LOC117799042	100.0|100.0	40.76|99.42	100.0|99.3	100.0|90.17	40.19|98.27	100.0|99.53	100.0|90.38	99.42|40.28	99.42|36.75	99.3|90.6	86.19
LZTS1	100.0|100.0	100.0|100.0	100.0|100.0	100.0|100.0	100.0|100.0	100.0|100.0	100.0|100.0	100.0|100.0	100.0|100.0	100.0|100.0	100
TAF8	83.87|97.38	100.0|100.0	100.0|100.0	100.0|100.0	97.38|83.87	97.38|84.42	97.38|83.87	100.0|100.0	100.0|100.0	100.0|100.0	96.28
NFRKB	100.0|100.0	100.0|100.0	100.0|100.0	100.0|100.0	100.0|100.0	100.0|100.0	100.0|100.0	100.0|100.0	100.0|100.0	100.0|100.0	100
NELFB	75.28|96.54	91.92|100.0	100.0|100.0	85.26|87.06	96.54|81.9	96.54|75.28	96.54|76.86	100.0|91.92	92.76|87.06	85.26|87.06	90.19
SIN3A	98.7|82.97	97.77|100.0	98.0|100.0	98.0|100.0	82.19|100.0	82.39|100.0	82.39|100.0	100.0|100.0	100.0|100.0	100.0|100.0	96.12
HNMT	94.81|100.0	79.55|100.0	95.13|99.32	94.81|100.0	83.9|100.0	100.0|99.32	100.0|100.0	100.0|83.39	100.0|83.9	99.32|100.0	95.67
SLC35F3	83.69|93.82	83.47|78.02	100.0|96.33	61.23|89.2	75.3|62.77	95.01|81.63	68.65|89.2	81.58|84.08	41.78|65.12	58.98|89.2	78.95
AGBL1	93.93|100.0	98.75|100.0	98.93|98.84	55.4|100.0	97.72|92.95	100.0|93.85	58.97|100.0	98.55|97.24	56.1|100.0	55.17|99.84	89.81
BUB3	83.99|84.76	83.99|84.76	84.29|85.58	83.69|75.89	100.0|100.0	99.09|99.69	98.78|88.77	99.09|99.69	98.78|88.77	99.39|88.77	91.39
IL10RA	77.73|57.12	77.28|60.35	77.51|60.52	77.51|60.42	94.6|100.0	95.09|100.0	94.27|100.0	100.0|100.0	100.0|100.0	100.0|100.0	86.62
LNPEP	98.36|99.42	98.36|88.85	98.84|100.0	97.59|100.0	100.0|89.37	100.0|100.0	98.64|100.0	89.37|100.0	88.15|100.0	98.73|100.0	97.28
KIN	53.48|78.32	53.48|78.32	53.48|78.52	53.48|78.32	100.0|100.0	100.0|100.0	100.0|100.0	100.0|100.0	100.0|100.0	100.0|100.0	86.37
CABLES1	61.69|94.73	64.6|100.0	68.3|87.04	46.5|100.0	94.73|95.5	100.0|84.18	71.4|100.0	99.39|81.82	71.98|100.0	59.26|100.0	84.06
PGGHG	100.0|100.0	98.06|100.0	95.71|99.0	99.86|100.0	98.5|100.0	91.79|96.13	100.0|100.0	97.4|96.42	99.86|98.15	96.28|95.59	98.14
OPRM1	92.84|97.01	92.84|97.01	92.84|85.31	68.97|92.04	100.0|100.0	98.5|86.62	71.82|91.72	98.5|86.62	71.82|91.72	63.6|92.36	88.61
MRPS27	79.43|93.98	79.43|93.98	79.43|93.98	60.69|90.85	100.0|100.0	100.0|100.0	79.04|100.0	100.0|100.0	79.04|100.0	71.81|90.85	89.63
TMEM61	98.56|97.62	75.0|97.5	50.48|50.24	88.46|92.93	76.19|100.0	50.0|50.24	88.1|93.43	65.62|50.24	84.38|68.18	47.37|50.0	73.73
TMEM255B	61.56|90.76	75.81|78.7	69.33|97.87	69.55|98.17	86.62|60.99	100.0|98.17	100.0|98.48	63.9|86.89	61.21|83.23	100.0|100.0	84.06
C11H4orf48	42.5|48.4	47.81|100.0	59.69|100.0	15.62|83.33	NA	NA	NA	87.5|61.31	61.46|98.33	42.34|96.67	67.5
CCM2	73.6|92.25	77.53|91.8	73.6|86.75	77.9|95.19	92.25|87.14	92.25|86.75	92.02|89.7	100.0|100.0	98.45|100.0	98.01|100.0	90.26
DOK3	99.78|100.0	99.55|99.78	100.0|100.0	99.78|100.0	99.78|99.78	100.0|100.0	100.0|100.0	100.0|100.0	99.78|99.78	100.0|100.0	99.9
RITA1	92.83|100.0	92.83|100.0	88.05|100.0	92.83|100.0	100.0|100.0	95.2|100.0	100.0|100.0	94.85|100.0	100.0|100.0	100.0|95.2	97.59
CCL26	100.0|93.89	97.87|73.02	90.43|91.4	98.94|100.0	100.0|100.0	88.55|100.0	93.89|100.0	67.46|91.4	73.02|98.92	90.32|90.32	91.97
F2R	99.0|93.19	99.0|92.97	99.5|92.79	99.0|91.9	100.0|100.0	100.0|99.77	100.0|100.0	100.0|99.77	100.0|100.0	100.0|100.0	98.34
ZNF787	91.32|100.0	92.41|100.0	91.32|100.0	5.86|21.77	100.0|100.0	100.0|100.0	8.09|25.0	100.0|100.0	9.9|25.0	8.14|25.0	65.19
VIT	100.0|100.0	98.96|100.0	100.0|100.0	100.0|100.0	98.96|100.0	100.0|100.0	100.0|100.0	100.0|100.0	100.0|98.97	100.0|100.0	99.84
CGAS	100.0|100.0	100.0|100.0	100.0|100.0	100.0|100.0	100.0|100.0	68.25|70.81	100.0|100.0	100.0|100.0	100.0|100.0	99.61|100.0	96.93
CASK	100.0|100.0	100.0|100.0	100.0|100.0	70.73|96.75	100.0|100.0	100.0|100.0	69.86|95.86	100.0|100.0	70.28|96.75	70.54|95.86	93.33
C3AR1	100.0|100.0	100.0|100.0	100.0|100.0	100.0|100.0	100.0|100.0	100.0|100.0	100.0|100.0	100.0|100.0	100.0|100.0	100.0|100.0	100
DDX11	86.11|99.23	86.78|99.12	86.4|99.56	86.11|99.34	100.0|99.56	100.0|100.0	100.0|100.0	100.0|100.0	99.56|100.0	100.0|100.0	97.09
LDLRAD1	70.62|67.16	70.62|67.16	98.97|88.07	70.62|67.16	100.0|100.0	91.18|85.32	100.0|100.0	97.55|91.28	100.0|100.0	91.28|97.55	87.73
CLDN20	100.0|100.0	100.0|100.0	100.0|100.0	100.0|100.0	100.0|100.0	100.0|100.0	100.0|100.0	100.0|100.0	100.0|100.0	100.0|100.0	100
KLRB1	99.56|98.25	99.11|99.11	95.56|100.0	99.11|100.0	98.68|100.0	95.18|100.0	98.68|100.0	96.44|100.0	100.0|100.0	100.0|97.75	98.87
COPS5	100.0|100.0	100.0|100.0	100.0|100.0	100.0|100.0	100.0|100.0	100.0|100.0	100.0|100.0	100.0|100.0	100.0|100.0	100.0|100.0	100
CLEC14A	100.0|100.0	100.0|100.0	95.71|100.0	99.8|100.0	100.0|100.0	96.11|100.0	99.8|100.0	95.71|100.0	99.8|100.0	99.78|95.62	99.12
CNTFR	100.0|100.0	100.0|94.18	100.0|100.0	93.01|82.78	100.0|94.18	100.0|100.0	93.26|82.78	94.18|100.0	87.59|82.78	93.01|82.78	94.03
LRRN4	100.0|99.73	100.0|100.0	100.0|97.54	84.36|94.29	100.0|100.0	98.66|100.0	75.3|94.29	98.52|100.0	75.13|93.95	80.35|98.99	94.56
SRRT	98.87|100.0	99.77|100.0	98.87|100.0	91.65|96.9	100.0|100.0	100.0|100.0	92.69|96.9	100.0|100.0	92.76|97.85	92.8|96.9	97.8
WNT11	100.0|100.0	100.0|100.0	100.0|100.0	100.0|58.03	100.0|100.0	100.0|100.0	100.0|58.03	100.0|100.0	100.0|58.03	100.0|58.03	91.61
LOC100478010	81.15|84.26	81.15|60.37	79.51|82.2	81.15|83.9	100.0|71.65	99.57|99.15	99.15|98.73	71.34|99.15	71.04|98.73	93.64|93.64	86.47
SUFU	100.0|100.0	100.0|100.0	100.0|100.0	63.84|100.0	100.0|100.0	100.0|100.0	63.84|100.0	100.0|100.0	63.71|100.0	63.71|100.0	92.76
ZC2HC1C	90.55|90.55	90.55|90.72	91.68|92.03	90.55|90.55	99.62|99.81	100.0|100.0	99.81|99.81	100.0|100.0	100.0|100.0	100.0|100.0	96.31
NGB	98.68|99.34	98.68|99.34	100.0|99.35	100.0|99.35	100.0|100.0	100.0|100.0	100.0|100.0	100.0|100.0	100.0|100.0	100.0|100.0	99.74
VARS1	97.5|100.0	97.65|100.0	97.88|100.0	97.5|100.0	100.0|100.0	98.34|97.26	100.0|100.0	98.34|97.42	100.0|100.0	97.26|98.34	98.87
LOC100482046	52.11|99.11	52.58|100.0	53.05|99.12	52.58|100.0	99.11|99.11	100.0|99.12	99.11|99.11	100.0|99.12	100.0|100.0	99.12|100.0	90.12
OGG1	99.42|99.13	90.41|82.71	97.97|97.68	98.84|99.71	92.17|84.57	98.84|98.84	98.84|100.0	81.91|89.28	81.38|89.74	99.13|100.0	94.03
KCNG4	100.0|99.02	100.0|99.02	100.0|100.0	100.0|100.0	100.0|100.0	99.41|100.0	100.0|100.0	99.41|100.0	100.0|100.0	100.0|100.0	99.84
COPRS	77.98|70.43	94.64|82.38	80.36|78.03	77.98|75.72	81.72|78.76	86.56|93.06	81.72|87.86	79.27|88.44	89.64|100.0	88.44|88.44	84.07
ZCWPW2	77.4|89.44	77.4|91.48	75.48|94.86	44.95|98.94	97.78|100.0	92.78|100.0	51.94|98.94	93.47|99.4	53.12|98.94	56.19|98.41	84.55
MIGA2	100.0|100.0	99.83|99.83	100.0|100.0	100.0|91.8	99.83|99.83	100.0|100.0	100.0|91.8	99.83|99.83	99.33|91.18	100.0|91.8	98.24
ATL3	100.0|100.0	100.0|100.0	100.0|100.0	100.0|100.0	100.0|100.0	100.0|100.0	100.0|100.0	100.0|100.0	100.0|100.0	100.0|100.0	100
MTF2	100.0|100.0	100.0|100.0	100.0|100.0	100.0|99.0	100.0|100.0	100.0|100.0	100.0|99.0	100.0|100.0	100.0|99.0	100.0|99.0	99.8
LOC100464876	99.12|100.0	99.12|100.0	97.37|99.11	99.12|100.0	100.0|100.0	98.23|99.11	100.0|100.0	98.23|99.11	100.0|100.0	99.11|98.23	99.29
CC2D1A	100.0|100.0	100.0|100.0	100.0|100.0	100.0|100.0	100.0|100.0	100.0|100.0	100.0|100.0	100.0|100.0	100.0|100.0	100.0|100.0	100
RPRD1A	100.0|100.0	100.0|100.0	100.0|100.0	84.29|96.69	100.0|100.0	100.0|100.0	84.29|96.69	100.0|100.0	84.29|96.69	84.29|96.69	96.2
TNFRSF1B	91.08|86.25	90.87|93.99	91.08|92.62	91.91|100.0	86.25|94.21	86.64|93.04	86.25|99.77	94.42|92.83	93.99|99.55	93.25|100.0	92.9
MDFIC	42.62|72.43	42.13|38.67	43.58|54.71	24.94|69.59	99.18|53.56	100.0|75.08	37.45|61.49	74.67|100.0	20.22|61.49	27.96|62.16	58.1
OPN5	92.63|93.37	92.63|99.72	99.21|100.0	92.63|99.72	93.63|100.0	93.37|93.37	93.63|100.0	99.72|93.37	100.0|100.0	93.37|99.72	96.5
SCYL3	100.0|100.0	100.0|100.0	100.0|100.0	100.0|100.0	100.0|100.0	100.0|100.0	100.0|100.0	100.0|100.0	100.0|100.0	100.0|100.0	100
MEAF6	62.13|61.4	62.72|60.92	62.13|54.69	63.31|49.31	100.0|98.28	71.93|64.06	62.57|49.31	70.69|64.06	61.49|49.31	63.02|55.76	64.35
GPR63	100.0|100.0	100.0|100.0	99.05|97.65	100.0|100.0	100.0|100.0	99.05|97.65	100.0|100.0	99.05|97.65	100.0|100.0	97.41|98.81	99.32
SPATA18	100.0|100.0	100.0|99.46	100.0|100.0	100.0|100.0	100.0|100.0	100.0|100.0	100.0|100.0	99.1|100.0	100.0|100.0	100.0|100.0	99.93
PINLYP	100.0|97.17	100.0|97.17	97.56|94.34	100.0|97.17	100.0|100.0	96.23|96.23	100.0|100.0	96.23|96.23	100.0|100.0	96.23|96.23	98.04
MPZL1	74.21|94.53	72.21|88.42	75.93|98.15	75.64|100.0	87.59|84.21	93.8|95.19	88.69|95.29	84.21|88.89	84.21|94.12	94.44|100.0	88.49
BTG2	66.67|100.0	88.48|81.13	62.96|96.84	61.73|100.0	100.0|61.13	95.68|98.1	92.59|100.0	58.49|98.1	56.6|100.0	94.94|100.0	85.67
LAYN	75.55|100.0	75.55|100.0	75.55|99.74	49.3|100.0	100.0|100.0	97.11|96.85	65.26|100.0	100.0|99.74	65.26|100.0	61.42|94.35	87.78
GFM2	90.38|100.0	100.0|100.0	100.0|100.0	99.87|99.87	100.0|90.42	100.0|90.5	99.86|90.26	100.0|100.0	99.87|100.0	100.0|99.87	98.05
TMEM209	95.94|96.96	96.11|96.97	96.11|96.97	95.94|96.96	100.0|99.82	100.0|99.82	100.0|100.0	100.0|100.0	99.82|100.0	99.82|100.0	98.56
SLC35F2	88.62|100.0	91.6|76.99	92.95|91.47	88.62|100.0	100.0|74.49	100.0|87.47	100.0|100.0	77.22|90.4	74.49|100.0	87.47|100.0	91.09
C17H17orf49	34.82|43.58	28.57|33.16	45.98|53.93	32.59|44.79	91.62|84.97	98.88|92.67	96.65|100.0	78.76|79.58	79.27|93.87	84.29|98.77	69.84
LHFPL5	87.87|98.53	70.82|98.63	70.49|98.17	70.82|91.14	79.41|98.63	79.04|98.17	79.41|91.14	100.0|100.0	99.54|91.98	99.54|91.98	89.77
LVRN	85.28|92.84	85.28|92.84	85.56|93.24	85.28|93.98	99.9|99.9	91.43|91.52	99.9|100.0	100.0|100.0	100.0|100.0	100.0|100.0	94.85
C17H9orf64	100.0|100.0	100.0|100.0	100.0|100.0	100.0|100.0	100.0|100.0	100.0|100.0	100.0|100.0	98.83|99.7	100.0|100.0	100.0|100.0	99.93
PRPF31	100.0|100.0	100.0|100.0	100.0|100.0	100.0|100.0	100.0|100.0	100.0|100.0	100.0|100.0	100.0|100.0	100.0|100.0	100.0|100.0	100
REEP4	60.67|68.41	60.67|91.47	69.92|92.83	62.72|94.57	74.78|100.0	85.22|100.0	74.78|100.0	100.0|100.0	100.0|100.0	100.0|100.0	86.8
SNAPC3	75.84|98.68	69.59|100.0	69.59|100.0	69.59|100.0	90.55|100.0	90.55|100.0	90.55|100.0	100.0|100.0	100.0|100.0	100.0|100.0	92.75
ESYT1	100.0|99.55	100.0|99.64	100.0|100.0	100.0|99.55	99.64|99.73	100.0|100.0	100.0|100.0	100.0|100.0	100.0|100.0	100.0|100.0	99.91
LOC100475338	97.06|100.0	100.0|96.02	100.0|95.66	100.0|91.58	78.24|72.91	76.58|70.92	80.03|69.92	100.0|100.0	100.0|95.67	100.0|95.91	91.03
PNPLA3	79.9|74.36	79.9|74.36	79.9|83.85	69.73|61.76	100.0|100.0	93.3|100.0	89.15|84.84	93.3|100.0	88.68|84.4	94.01|79.34	85.54
CCDC110	91.89|100.0	99.27|98.91	56.3|54.83	100.0|98.12	98.42|89.99	52.11|46.58	100.0|89.28	56.82|55.54	99.03|96.7	55.31|55.24	79.72
PRDM14	31.35|67.04	83.89|83.89	84.59|86.1	84.24|85.44	66.67|31.17	67.04|31.91	67.42|31.97	84.94|86.45	84.06|85.26	84.85|84.55	70.64
NBN	83.97|99.33	84.09|98.94	83.97|99.07	81.49|99.04	100.0|100.0	100.0|100.0	97.33|100.0	100.0|100.0	97.08|100.0	97.6|100.0	96.1
A4GALT	85.64|99.72	89.78|95.84	86.37|98.89	85.89|100.0	99.72|91.43	99.72|98.05	99.72|100.0	92.21|98.89	91.69|100.0	97.77|100.0	95.57
BPI	94.27|96.88	79.6|97.72	79.6|97.12	85.33|93.7	83.54|99.79	84.06|99.79	80.24|85.74	100.0|99.79	95.86|85.74	95.88|86.3	91.05
C11H4orf17	100.0|89.92	94.54|100.0	95.4|100.0	100.0|100.0	85.01|100.0	85.79|100.0	91.47|100.0	100.0|100.0	100.0|94.63	100.0|95.48	96.61
ETFBKMT	100.0|100.0	100.0|100.0	92.48|96.47	100.0|100.0	100.0|100.0	92.48|96.47	100.0|100.0	100.0|100.0	100.0|100.0	100.0|100.0	98.9
ECSIT	93.3|92.66	93.53|93.75	92.61|92.18	92.61|92.4	93.35|94.21	93.35|93.56	92.43|92.86	93.06|92.41	93.29|92.86	92.18|92.4	92.95
IRF6	100.0|100.0	100.0|100.0	100.0|100.0	100.0|100.0	100.0|100.0	100.0|100.0	100.0|100.0	100.0|100.0	100.0|100.0	100.0|100.0	100
LDB3	89.1|98.16	90.13|98.18	91.03|98.2	91.54|100.0	100.0|100.0	100.0|100.0	100.0|100.0	100.0|100.0	100.0|100.0	100.0|100.0	97.82
SP1	100.0|99.62	99.49|100.0	100.0|100.0	54.48|72.95	88.82|89.85	100.0|100.0	54.26|73.12	89.72|89.37	54.76|72.95	65.04|86.99	84.57
ERCC4	100.0|100.0	100.0|100.0	100.0|100.0	100.0|100.0	100.0|100.0	100.0|100.0	100.0|100.0	100.0|100.0	100.0|100.0	100.0|100.0	100
TNFSF10	94.59|87.5	94.59|97.9	89.53|91.07	94.93|97.91	89.38|100.0	85.0|93.47	89.69|100.0	95.1|93.47	100.0|100.0	93.81|95.12	94.15
SLC26A11	99.18|100.0	100.0|100.0	96.4|99.33	99.18|100.0	100.0|100.0	97.19|99.33	100.0|100.0	97.33|100.0	100.0|100.0	99.33|97.19	99.22
DNASE2B	98.35|99.44	98.35|100.0	98.08|100.0	98.35|100.0	99.17|100.0	98.89|100.0	99.17|100.0	99.72|100.0	100.0|100.0	100.0|99.72	99.46
IQSEC1	86.9|84.66	86.72|86.41	87.36|86.81	75.92|83.48	85.73|87.68	86.35|88.08	76.81|86.71	87.59|87.35	79.2|87.41	82.62|91.44	85.26
CPN2	27.97|27.92	27.97|27.97	27.79|27.79	27.97|27.92	99.82|100.0	28.47|28.52	99.82|99.82	27.97|27.97	100.0|99.82	28.15|28.1	49.59
MYOD1	100.0|100.0	100.0|100.0	100.0|100.0	100.0|83.07	100.0|100.0	100.0|100.0	100.0|83.07	100.0|100.0	100.0|83.07	100.0|83.07	96.61
ZNF410	95.63|100.0	97.62|100.0	95.63|100.0	96.63|100.0	97.7|97.9	100.0|100.0	97.7|98.52	97.9|97.7	98.95|99.58	97.7|98.52	98.38
OSBPL8	94.55|100.0	94.55|100.0	94.55|100.0	94.55|100.0	100.0|100.0	100.0|100.0	100.0|100.0	100.0|100.0	100.0|100.0	100.0|100.0	98.91
LOC100469206	100.0|100.0	91.14|98.33	100.0|100.0	73.15|100.0	92.26|98.33	100.0|100.0	72.87|100.0	98.39|92.42	69.35|89.31	73.01|100.0	92.43
PPP1R11	52.38|52.38	70.63|70.63	48.41|46.56	52.38|50.38	52.38|52.38	48.41|46.56	52.38|50.38	48.41|46.56	52.38|50.38	78.63|78.63	55.06
ABRAXAS1	66.3|100.0	75.32|100.0	76.98|100.0	75.32|100.0	100.0|88.02	100.0|90.66	100.0|88.24	100.0|100.0	100.0|100.0	100.0|100.0	93.04
MLIP	80.68|100.0	95.9|100.0	94.93|100.0	97.37|100.0	100.0|84.3	100.0|85.73	100.0|90.44	99.29|100.0	96.53|95.27	99.48|96.78	95.84
GON4L	100.0|100.0	97.08|92.95	100.0|100.0	64.71|99.86	97.31|93.34	100.0|100.0	65.08|100.0	94.41|97.9	62.12|100.0	66.03|100.0	91.54
ARPC5	100.0|100.0	100.0|100.0	100.0|100.0	100.0|100.0	100.0|100.0	100.0|100.0	100.0|100.0	100.0|100.0	100.0|100.0	100.0|100.0	100
KLF7	100.0|100.0	81.13|80.86	100.0|100.0	72.52|86.56	81.13|80.86	100.0|100.0	72.52|86.56	80.86|81.4	72.28|86.56	72.76|86.56	86.13
MRNIP	96.83|63.13	97.29|63.24	98.64|65.07	97.29|65.15	100.0|100.0	100.0|100.0	100.0|100.0	100.0|100.0	100.0|100.0	100.0|100.0	92.33
PRIM2	100.0|100.0	100.0|100.0	99.61|100.0	30.45|90.64	100.0|100.0	99.61|100.0	30.45|90.64	99.61|100.0	30.45|90.64	30.69|90.64	84.17
DMKN	100.0|100.0	100.0|100.0	25.13|28.44	96.46|100.0	100.0|100.0	28.27|28.44	100.0|100.0	5.14|5.73	96.4|100.0	24.24|24.19	68.12
WSCD2	100.0|100.0	100.0|100.0	100.0|100.0	100.0|100.0	100.0|100.0	100.0|100.0	100.0|100.0	100.0|100.0	100.0|100.0	100.0|100.0	100
RASL10B	77.78|100.0	77.78|100.0	77.78|100.0	77.78|100.0	100.0|100.0	100.0|100.0	100.0|100.0	100.0|100.0	100.0|100.0	100.0|100.0	95.56
ALDH8A1	100.0|100.0	100.0|92.94	100.0|100.0	100.0|100.0	100.0|92.94	100.0|100.0	100.0|100.0	92.94|100.0	92.94|100.0	100.0|100.0	98.59
LZTS2	99.85|99.85	100.0|100.0	100.0|100.0	100.0|100.0	99.7|99.85	100.0|100.0	99.85|99.85	100.0|100.0	100.0|100.0	100.0|100.0	99.95
IL10	100.0|81.36	100.0|100.0	99.44|100.0	100.0|100.0	80.91|100.0	80.45|99.44	80.91|100.0	99.44|99.44	100.0|100.0	99.44|99.44	96.01
MDM2	87.15|94.66	87.15|94.66	88.85|96.11	87.15|94.66	100.0|100.0	100.0|100.0	100.0|100.0	100.0|100.0	100.0|100.0	100.0|100.0	96.52
DBX1	83.44|79.53	83.44|79.53	83.44|81.19	83.44|79.3	92.98|92.98	91.52|93.43	91.81|91.55	91.52|93.43	91.81|91.55	93.43|91.25	88.03
ARHGDIB	100.0|100.0	100.0|100.0	100.0|100.0	100.0|100.0	100.0|100.0	100.0|100.0	100.0|100.0	100.0|100.0	100.0|100.0	100.0|100.0	100
NGEF	100.0|94.68	99.7|94.79	99.11|94.23	86.81|90.29	100.0|100.0	100.0|100.0	82.21|90.45	100.0|100.0	82.54|90.29	82.54|90.29	93.9
MOB2	45.67|60.24	45.67|50.5	45.67|57.52	45.67|57.52	90.55|75.91	100.0|100.0	100.0|100.0	75.91|86.47	75.91|86.47	100.0|100.0	74.98
SPHK1	79.47|100.0	100.0|100.0	77.82|97.68	79.47|100.0	100.0|79.47	98.45|97.94	100.0|100.0	77.41|97.16	79.47|100.0	96.91|97.16	92.92
OSGIN2	100.0|97.45	100.0|97.27	100.0|97.27	100.0|97.27	100.0|100.0	100.0|100.0	100.0|100.0	100.0|100.0	100.0|100.0	100.0|100.0	99.46
LCT	100.0|100.0	100.0|100.0	100.0|100.0	100.0|100.0	100.0|100.0	100.0|100.0	100.0|100.0	100.0|100.0	100.0|100.0	100.0|100.0	100
GIPC1	83.33|99.1	83.33|99.1	83.33|99.1	83.33|99.1	100.0|100.0	100.0|100.0	100.0|100.0	100.0|100.0	100.0|100.0	100.0|100.0	96.49
SLC43A1	100.0|100.0	100.0|100.0	100.0|92.59	100.0|82.09	100.0|100.0	100.0|92.59	100.0|82.09	100.0|92.59	100.0|82.09	93.41|83.26	95.04
UBR7	100.0|100.0	100.0|100.0	100.0|100.0	100.0|100.0	100.0|100.0	100.0|100.0	100.0|100.0	100.0|100.0	100.0|100.0	100.0|100.0	100
DRGX	100.0|100.0	100.0|100.0	100.0|100.0	100.0|100.0	100.0|100.0	100.0|100.0	100.0|100.0	100.0|100.0	100.0|100.0	100.0|100.0	100
WDFY1	65.97|84.63	65.97|84.63	65.97|84.63	65.97|84.63	100.0|100.0	99.76|99.76	100.0|100.0	99.51|99.51	100.0|100.0	99.76|99.76	90.02
PCOLCE2	90.84|90.41	100.0|100.0	100.0|100.0	86.51|100.0	90.41|90.84	90.41|91.06	76.98|89.42	100.0|100.0	86.51|100.0	86.71|100.0	93.51
TDP1	91.55|96.38	91.08|92.97	91.71|96.22	80.59|100.0	95.55|92.65	100.0|100.0	84.51|100.0	92.97|95.57	81.31|99.22	84.4|100.0	93.33
ADGRG4	99.11|99.93	99.54|98.86	100.0|100.0	97.8|100.0	99.64|98.14	100.0|100.0	97.85|100.0	100.0|100.0	98.04|100.0	100.0|100.0	99.45
FAM102A	96.32|100.0	100.0|100.0	100.0|100.0	100.0|100.0	100.0|96.31	100.0|96.43	100.0|96.46	100.0|100.0	100.0|100.0	100.0|100.0	99.28
EED	100.0|100.0	100.0|100.0	100.0|88.2	100.0|100.0	100.0|100.0	100.0|88.2	100.0|100.0	100.0|93.2	100.0|100.0	93.2|100.0	98.14
PPIE	92.07|100.0	91.77|100.0	91.77|100.0	94.51|100.0	100.0|100.0	100.0|100.0	100.0|100.0	100.0|100.0	100.0|100.0	100.0|100.0	98.51
AFTPH	100.0|100.0	100.0|100.0	100.0|100.0	100.0|100.0	100.0|100.0	100.0|100.0	100.0|100.0	100.0|100.0	100.0|100.0	100.0|100.0	100
LOC100463551	100.0|75.71	66.94|100.0	99.84|89.88	94.3|100.0	50.68|100.0	84.71|100.0	71.39|100.0	99.76|60.12	100.0|70.98	84.75|99.83	87.44
NSG1	70.53|78.49	70.53|78.49	70.05|78.38	70.53|78.49	100.0|100.0	99.46|100.0	100.0|100.0	99.46|100.0	100.0|100.0	100.0|99.46	89.69
CADM4	81.59|82.22	81.33|86.18	81.33|81.96	42.46|82.59	95.36|100.0	100.0|100.0	42.78|82.59	100.0|95.1	44.99|82.59	42.78|82.59	79.42
TTYH2	100.0|93.07	100.0|92.21	100.0|93.42	100.0|94.13	98.13|97.22	100.0|100.0	98.5|99.62	97.22|98.5	97.22|99.24	98.87|99.62	97.85
IGSF23	95.61|100.0	90.54|91.78	83.11|100.0	77.36|90.51	97.17|94.18	98.23|100.0	91.87|100.0	92.47|100.0	89.04|100.0	92.89|87.75	93.63
AMIGO2	99.81|99.81	100.0|100.0	100.0|100.0	100.0|100.0	99.81|99.81	99.81|100.0	99.81|99.81	100.0|100.0	100.0|100.0	100.0|100.0	99.93
R3HDML	99.6|99.6	100.0|100.0	100.0|99.6	98.41|98.41	99.6|99.6	100.0|100.0	100.0|100.0	100.0|99.6	98.41|98.41	98.81|99.21	99.46
LOC117798878	100.0|100.0	48.8|82.65	98.49|98.49	100.0|100.0	48.8|82.65	99.4|99.4	100.0|100.0	82.65|48.8	82.65|48.8	99.4|99.4	86.02
ASAH2	99.74|99.74	100.0|100.0	100.0|100.0	100.0|99.49	100.0|100.0	99.74|100.0	100.0|100.0	100.0|100.0	100.0|100.0	100.0|99.49	99.91
SSC5D	100.0|69.28	100.0|65.94	100.0|68.49	88.14|61.89	100.0|100.0	100.0|100.0	98.3|99.62	100.0|100.0	98.81|100.0	92.85|95.5	91.94
CCN4	100.0|100.0	100.0|100.0	100.0|100.0	92.82|100.0	100.0|100.0	100.0|100.0	91.55|100.0	100.0|100.0	91.55|100.0	91.55|100.0	98.37
SLC16A10	100.0|45.17	100.0|38.95	100.0|39.26	100.0|50.63	100.0|86.24	100.0|86.91	89.21|100.0	100.0|100.0	76.94|100.0	77.54|100.0	84.54
SCNM1	100.0|100.0	100.0|100.0	81.3|100.0	100.0|100.0	100.0|100.0	81.3|100.0	100.0|100.0	81.3|100.0	100.0|100.0	100.0|81.3	96.26
TATDN3	100.0|100.0	100.0|100.0	98.91|92.18	100.0|100.0	100.0|100.0	99.27|92.18	100.0|100.0	98.91|92.18	100.0|100.0	92.18|100.0	98.29
SEMA6B	73.56|79.42	72.89|79.97	100.0|100.0	73.02|77.38	100.0|100.0	91.3|71.11	84.78|83.21	93.52|71.67	94.7|91.47	65.69|82.79	84.32
PPP1R12C	100.0|97.64	93.54|93.91	99.87|96.8	93.27|93.64	100.0|100.0	100.0|100.0	98.88|100.0	98.81|95.4	98.68|98.68	95.65|99.07	97.69
ACP6	85.08|97.2	93.99|85.08	91.76|98.56	94.21|98.6	97.2|77.02	95.42|89.71	97.2|89.04	84.27|100.0	86.49|100.0	100.0|97.67	92.93
DCSTAMP	91.28|97.5	100.0|100.0	99.79|99.79	100.0|100.0	97.5|91.28	97.5|91.28	97.73|91.3	99.79|99.79	100.0|100.0	98.51|98.3	97.57
RTP1	100.0|100.0	100.0|100.0	100.0|100.0	100.0|78.98	100.0|100.0	100.0|100.0	100.0|78.98	100.0|100.0	100.0|78.98	100.0|78.98	95.8
TMBIM7P	59.72|70.43	60.28|70.63	58.87|69.21	60.28|74.31	99.67|99.01	100.0|99.67	99.67|100.0	99.67|100.0	100.0|100.0	100.0|100.0	86.07
DCDC2	100.0|97.05	100.0|96.96	100.0|97.05	41.43|92.27	100.0|100.0	97.26|97.26	40.21|92.27	97.17|100.0	38.66|92.27	39.79|91.3	85.55
KIFC3	90.97|99.89	91.75|100.0	90.39|100.0	91.17|99.16	99.89|99.15	100.0|100.0	99.89|98.94	99.05|100.0	99.37|99.16	100.0|98.1	97.84
ARID3C	100.0|100.0	100.0|100.0	100.0|100.0	100.0|68.73	100.0|100.0	100.0|100.0	100.0|68.73	100.0|100.0	100.0|68.73	100.0|68.9	93.75
DGAT1	50.67|78.26	51.21|77.64	51.21|76.71	28.02|97.66	88.2|86.59	87.58|84.94	43.27|97.66	86.99|85.94	33.13|76.17	41.57|96.73	71.01
ALMS1	21.98|29.31	98.6|100.0	39.4|53.06	2.08|3.08	51.65|39.88	52.02|52.53	3.25|3.61	40.6|53.09	2.51|3.61	44.41|48.85	37.18
TTC5	90.7|90.91	90.7|90.91	90.7|90.91	90.7|87.34	100.0|100.0	100.0|100.0	100.0|96.07	100.0|100.0	100.0|96.07	100.0|96.07	95.55
RIPOR2	100.0|93.43	97.09|98.38	100.0|98.89	100.0|100.0	90.8|98.48	94.13|99.63	92.2|100.0	98.0|95.64	97.05|97.8	97.77|100.0	97.46
IFT43	99.05|100.0	100.0|100.0	98.1|100.0	55.92|100.0	100.0|100.0	99.52|100.0	53.14|94.02	97.67|100.0	53.49|98.29	50.97|89.74	89.5
DNAI4	95.17|99.88	95.52|100.0	96.23|100.0	82.45|96.55	100.0|99.75	100.0|100.0	86.53|96.55	100.0|100.0	86.31|96.55	86.37|96.14	95.7
ARV1	100.0|100.0	100.0|100.0	100.0|100.0	100.0|100.0	100.0|100.0	100.0|100.0	100.0|100.0	100.0|100.0	100.0|100.0	100.0|100.0	100
CRAT	100.0|100.0	100.0|100.0	98.56|98.56	100.0|90.72	100.0|100.0	98.56|98.56	100.0|90.72	98.56|98.56	100.0|90.72	98.56|89.42	97.58
MON1B	98.22|100.0	98.22|100.0	99.29|100.0	98.22|100.0	100.0|100.0	100.0|100.0	100.0|100.0	100.0|100.0	100.0|100.0	100.0|100.0	99.7
PRR29	70.66|95.31	62.93|99.39	57.92|62.24	68.73|95.19	85.42|100.0	79.69|63.49	100.0|100.0	98.17|66.8	95.12|83.42	61.0|78.61	81.2
C4H3orf49	98.29|97.96	100.0|100.0	98.98|98.31	98.29|98.63	97.96|97.96	97.96|97.63	97.96|98.63	98.64|98.31	97.96|98.63	97.63|98.63	98.42
POMT1	95.2|99.86	100.0|100.0	99.87|100.0	100.0|100.0	93.06|91.69	92.93|91.55	96.05|94.51	98.39|98.39	100.0|100.0	100.0|99.87	97.57
USP11	52.83|85.03	52.7|82.14	53.37|85.99	49.73|84.63	99.89|96.74	100.0|100.0	93.93|99.31	97.16|100.0	90.86|99.2	95.66|100.0	85.96
TNIP1	89.27|93.07	90.03|93.12	91.24|93.35	89.27|93.22	100.0|100.0	100.0|100.0	100.0|100.0	100.0|100.0	100.0|100.0	100.0|100.0	96.63
MIER3	93.56|100.0	93.56|100.0	98.03|99.46	93.56|100.0	100.0|100.0	100.0|95.46	100.0|100.0	100.0|95.46	100.0|100.0	95.46|100.0	98.23
LOC100467946	60.36|72.82	60.36|71.94	61.77|72.58	72.84|86.81	100.0|100.0	100.0|100.0	100.0|100.0	100.0|100.0	100.0|100.0	100.0|100.0	87.97
PNKP	88.96|100.0	93.04|100.0	88.79|100.0	95.42|100.0	100.0|100.0	100.0|100.0	100.0|97.75	100.0|100.0	100.0|100.0	100.0|97.94	98.1
CEP135	100.0|100.0	100.0|99.91	100.0|99.91	100.0|99.91	99.91|99.91	99.91|99.91	99.91|99.91	99.91|99.91	100.0|100.0	99.91|99.91	99.94
CATSPER1	4.46|4.66	41.36|67.45	44.7|58.45	4.35|4.93	43.82|68.36	47.67|59.62	53.73|58.28	70.0|56.12	68.36|47.53	61.22|53.1	45.91
RMI1	100.0|100.0	100.0|100.0	100.0|100.0	100.0|100.0	100.0|100.0	100.0|100.0	100.0|100.0	98.59|100.0	98.59|100.0	100.0|100.0	99.86
PI15	100.0|100.0	100.0|100.0	100.0|95.91	100.0|100.0	100.0|100.0	100.0|95.91	100.0|100.0	100.0|95.91	100.0|100.0	95.91|100.0	99.18
SIM1	100.0|100.0	100.0|100.0	100.0|100.0	100.0|100.0	100.0|100.0	100.0|100.0	100.0|100.0	100.0|100.0	100.0|100.0	100.0|100.0	100
TMEM145	100.0|71.12	100.0|100.0	100.0|80.79	100.0|97.57	71.12|88.81	70.84|82.45	70.98|93.1	96.45|89.9	92.9|97.57	83.28|93.84	89.04
INSYN2A	100.0|100.0	100.0|100.0	100.0|100.0	100.0|97.96	100.0|100.0	100.0|100.0	100.0|98.77	100.0|100.0	100.0|98.77	100.0|96.93	99.62
LMAN1	100.0|100.0	100.0|100.0	100.0|100.0	100.0|100.0	100.0|100.0	100.0|100.0	100.0|100.0	100.0|100.0	100.0|100.0	100.0|100.0	100
SIM2	80.73|95.83	82.72|95.92	80.89|80.52	82.72|95.75	95.28|93.09	100.0|84.02	95.28|92.92	93.79|80.52	100.0|100.0	80.52|93.63	90.21
C14H18orf54	66.85|97.04	94.81|89.35	95.74|98.29	94.44|96.77	96.77|62.83	97.85|69.2	96.77|68.31	89.35|97.34	88.83|96.58	98.29|98.1	89.68
CRISPLD1	91.41|100.0	91.41|100.0	91.41|100.0	91.41|100.0	100.0|100.0	100.0|100.0	100.0|100.0	100.0|100.0	100.0|100.0	100.0|100.0	98.28
NGF	100.0|100.0	100.0|100.0	100.0|78.18	100.0|73.03	100.0|100.0	99.59|78.18	100.0|73.03	100.0|78.18	100.0|73.03	92.83|86.36	91.62
TRIB2	100.0|100.0	100.0|100.0	100.0|100.0	100.0|100.0	100.0|100.0	100.0|100.0	100.0|100.0	100.0|100.0	100.0|100.0	100.0|100.0	100
TP63	84.12|97.61	100.0|97.56	100.0|100.0	68.38|100.0	97.61|82.07	97.61|84.12	79.35|100.0	97.56|100.0	66.71|100.0	68.38|100.0	91.05
CFAP97	97.0|99.42	97.19|91.04	100.0|100.0	82.18|100.0	100.0|91.92	100.0|100.0	85.38|100.0	96.49|100.0	78.03|100.0	79.89|100.0	94.93
CDC42EP3	86.64|99.61	86.64|99.61	86.64|99.61	86.64|100.0	100.0|100.0	100.0|100.0	100.0|100.0	100.0|100.0	100.0|100.0	100.0|100.0	97.27
ACYP2	41.27|60.47	40.21|59.84	30.16|53.77	41.27|84.78	100.0|100.0	85.27|100.0	71.32|100.0	85.04|100.0	72.44|100.0	68.87|79.35	73.7
IRS4	100.0|100.0	98.43|84.68	88.24|92.52	81.25|100.0	99.29|84.35	88.56|91.69	80.94|100.0	84.08|100.0	70.45|100.0	82.07|99.8	91.32
TLK1	100.0|100.0	100.0|100.0	100.0|100.0	82.38|91.05	100.0|100.0	100.0|100.0	82.25|90.91	100.0|100.0	82.25|90.91	82.25|90.91	94.65
TOR1AIP1	100.0|100.0	100.0|100.0	100.0|100.0	100.0|100.0	100.0|100.0	100.0|100.0	100.0|100.0	100.0|100.0	100.0|100.0	100.0|100.0	100
BMPR1A	100.0|100.0	100.0|100.0	100.0|100.0	100.0|100.0	100.0|100.0	100.0|100.0	100.0|100.0	100.0|100.0	100.0|100.0	100.0|100.0	100
MZB1	95.48|100.0	100.0|100.0	95.48|100.0	95.48|100.0	100.0|95.48	100.0|100.0	100.0|100.0	95.48|100.0	95.48|100.0	100.0|100.0	98.64
ACD	100.0|91.92	99.78|98.7	100.0|100.0	53.41|81.27	91.52|98.48	91.72|100.0	57.37|94.98	98.48|100.0	52.61|80.94	58.17|80.94	86.51
AMMECR1L	100.0|100.0	100.0|100.0	100.0|100.0	100.0|100.0	100.0|100.0	100.0|100.0	100.0|100.0	100.0|100.0	100.0|100.0	100.0|100.0	100
CASZ1	64.94|99.78	54.51|99.83	83.83|100.0	80.12|98.9	83.9|100.0	100.0|78.94	99.93|80.28	100.0|66.29	99.66|67.17	91.26|93.27	87.13
DYRK4	92.95|99.53	92.8|99.06	93.1|100.0	91.48|100.0	99.37|99.06	100.0|100.0	97.96|100.0	100.0|100.0	97.65|100.0	98.58|100.0	98.08
DES	59.47|90.76	71.27|97.45	70.96|97.44	69.72|87.18	94.31|84.5	94.08|84.65	94.31|77.28	100.0|100.0	98.09|89.71	98.29|89.51	87.45
LOC100469265	100.0|94.21	100.0|96.2	100.0|100.0	100.0|84.44	97.93|100.0	94.21|100.0	100.0|89.63	96.2|100.0	100.0|87.78	100.0|84.44	96.25
FAM163B	62.58|62.58	100.0|99.39	100.0|99.4	100.0|99.39	63.19|62.8	65.64|64.07	63.19|62.8	100.0|100.0	100.0|100.0	100.0|100.0	85.25
CLEC12A	80.97|70.23	100.0|100.0	99.63|100.0	100.0|100.0	69.58|79.34	70.23|81.27	77.35|81.02	96.31|97.75	100.0|100.0	100.0|96.61	90.01
TMOD3	95.79|96.88	95.79|96.88	95.79|96.88	95.79|96.88	99.72|99.72	99.72|99.72	99.72|99.72	100.0|100.0	100.0|100.0	100.0|100.0	98.45
FOXI1	100.0|100.0	100.0|100.0	100.0|100.0	100.0|100.0	100.0|100.0	100.0|100.0	100.0|100.0	100.0|100.0	100.0|100.0	100.0|100.0	100
SHCBP1	100.0|93.31	99.55|98.37	100.0|100.0	99.55|98.37	94.81|100.0	94.81|100.0	94.81|100.0	100.0|100.0	100.0|100.0	100.0|100.0	98.68
IFNGR1	100.0|100.0	99.16|100.0	100.0|100.0	100.0|100.0	99.16|100.0	100.0|100.0	100.0|100.0	100.0|99.79	100.0|99.16	100.0|100.0	99.86
PENK	100.0|95.0	100.0|95.0	100.0|100.0	100.0|95.0	100.0|100.0	95.71|100.0	100.0|100.0	95.71|100.0	100.0|100.0	100.0|95.71	98.61
ABCB10	79.05|100.0	81.7|99.83	86.87|86.99	87.85|98.9	100.0|96.59	99.12|78.46	100.0|88.99	99.66|81.68	100.0|92.14	89.93|100.0	92.39
MXD4	54.92|91.19	54.92|78.38	100.0|100.0	65.15|80.0	98.11|84.32	98.11|74.64	94.34|69.77	84.32|74.64	81.08|69.77	71.77|69.77	79.76
WNT9B	98.37|100.0	92.1|60.25	89.92|91.92	100.0|97.91	92.22|59.18	92.5|92.76	95.0|89.3	59.0|92.2	62.57|91.64	95.26|89.3	87.07
PDRG1	100.0|100.0	100.0|100.0	100.0|100.0	100.0|100.0	100.0|100.0	100.0|100.0	100.0|100.0	100.0|100.0	100.0|100.0	100.0|100.0	100
C1H3orf38	99.69|99.39	99.69|93.68	99.69|93.68	99.69|93.68	99.39|93.68	99.39|93.68	99.39|93.68	100.0|100.0	100.0|100.0	100.0|100.0	97.92
USB1	72.73|97.14	63.9|86.91	72.73|100.0	72.73|100.0	83.93|85.45	96.07|100.0	96.07|100.0	86.18|88.76	85.45|87.36	100.0|100.0	88.77
WARS2	88.74|91.94	88.74|91.94	88.74|91.94	91.42|98.55	100.0|100.0	100.0|100.0	91.94|95.66	100.0|100.0	91.94|95.66	91.94|95.66	94.74
DTWD1	100.0|100.0	100.0|100.0	100.0|99.34	100.0|100.0	100.0|100.0	100.0|99.67	100.0|100.0	100.0|99.67	100.0|100.0	99.67|100.0	99.92
RAB29	100.0|99.51	100.0|100.0	100.0|100.0	100.0|100.0	99.51|100.0	100.0|100.0	99.51|100.0	100.0|100.0	100.0|100.0	100.0|100.0	99.93
UNKL	100.0|100.0	71.1|84.71	100.0|93.26	50.54|91.34	65.68|77.9	100.0|89.0	47.67|85.75	89.5|66.85	65.19|98.88	47.46|96.37	81.06
PARP3	100.0|100.0	100.0|100.0	100.0|100.0	100.0|100.0	100.0|100.0	100.0|100.0	100.0|100.0	100.0|100.0	100.0|100.0	100.0|100.0	100
APBA1	90.2|100.0	90.85|100.0	90.96|100.0	53.39|95.57	97.48|96.78	97.84|96.67	58.89|94.41	100.0|100.0	61.81|99.81	61.76|100.0	89.32
KLC1	92.65|97.9	94.79|97.17	94.79|97.17	94.33|98.25	97.9|94.98	97.9|94.98	97.9|96.49	100.0|100.0	96.7|98.25	96.7|98.25	96.86
LOC100465298	49.85|98.81	100.0|100.0	100.0|100.0	100.0|100.0	98.81|49.85	98.81|49.85	98.81|49.85	100.0|100.0	100.0|100.0	100.0|100.0	89.73
KCNA10	99.61|99.61	99.61|99.61	99.61|99.61	99.61|99.61	100.0|100.0	100.0|100.0	100.0|100.0	100.0|100.0	100.0|100.0	100.0|100.0	99.84
IKBKE	100.0|100.0	99.86|100.0	100.0|100.0	100.0|100.0	99.86|100.0	100.0|100.0	100.0|100.0	100.0|100.0	100.0|99.86	100.0|100.0	99.98
EVPL	96.57|98.43	96.33|95.14	96.57|98.33	85.81|94.73	100.0|96.9	99.9|99.8	88.93|96.32	96.85|99.85	86.27|96.43	88.89|96.38	95.42
MGAT5B	100.0|100.0	100.0|91.64	100.0|100.0	100.0|100.0	100.0|91.64	100.0|100.0	100.0|100.0	91.64|100.0	91.64|100.0	100.0|100.0	98.33
DTX3	96.54|87.22	58.49|87.74	88.99|71.65	96.54|87.22	52.84|87.74	92.33|82.28	97.73|97.73	77.36|41.52	87.74|52.84	81.01|90.91	80.82
GPR84	99.49|96.31	100.0|95.62	100.0|100.0	99.49|99.49	96.55|95.38	97.04|99.49	96.55|99.75	96.35|100.0	95.38|99.75	99.49|100.0	98.31
TNKS1BP1	100.0|100.0	100.0|100.0	100.0|100.0	52.95|100.0	100.0|100.0	100.0|100.0	41.96|85.94	100.0|100.0	38.86|78.17	44.13|86.74	86.44
FBH1	100.0|100.0	100.0|100.0	100.0|100.0	92.93|100.0	100.0|100.0	100.0|100.0	92.92|100.0	100.0|100.0	92.93|100.0	93.28|100.0	98.6
RBPJ	92.59|97.54	92.59|97.74	86.55|84.41	85.19|93.98	98.56|98.77	92.4|85.55	89.73|93.98	92.39|85.36	89.92|93.98	82.51|93.33	91.35
TRIP11	93.42|97.72	93.42|97.67	93.62|97.98	93.42|97.67	99.95|99.9	100.0|100.0	99.95|99.9	100.0|100.0	100.0|100.0	100.0|100.0	98.23
EPGN	100.0|100.0	100.0|100.0	100.0|100.0	100.0|100.0	100.0|100.0	100.0|100.0	100.0|100.0	100.0|100.0	100.0|100.0	100.0|100.0	100
RGS3	83.44|99.34	83.04|98.68	75.52|98.65	44.85|93.55	98.68|98.49	89.72|98.45	53.58|93.88	89.64|98.55	51.98|91.24	39.44|62.98	82.19
MAP3K7	100.0|100.0	100.0|100.0	100.0|100.0	78.55|100.0	100.0|100.0	100.0|100.0	78.55|100.0	100.0|100.0	78.55|100.0	78.55|100.0	95.71
PPP1R37	100.0|100.0	100.0|100.0	100.0|100.0	77.71|100.0	100.0|100.0	100.0|100.0	78.09|100.0	100.0|100.0	77.87|100.0	77.67|100.0	95.57
CDKL1	100.0|100.0	100.0|100.0	99.72|100.0	85.55|99.67	100.0|100.0	99.72|100.0	85.55|99.67	99.72|100.0	85.55|99.67	85.8|99.67	97.01
EMD	100.0|100.0	100.0|100.0	100.0|100.0	89.62|98.73	100.0|100.0	100.0|100.0	89.62|98.73	100.0|100.0	89.96|100.0	89.96|98.73	97.77
CYYR1	100.0|100.0	100.0|100.0	74.42|77.58	48.84|84.85	100.0|100.0	74.42|77.58	48.84|84.85	74.42|77.58	48.84|84.85	24.24|40.4	76.09
RAB30	100.0|100.0	100.0|100.0	100.0|100.0	100.0|100.0	100.0|100.0	100.0|100.0	100.0|100.0	100.0|100.0	100.0|100.0	100.0|100.0	100
WDR45	100.0|91.38	100.0|100.0	100.0|100.0	100.0|78.71	93.2|100.0	81.63|100.0	100.0|93.35	100.0|100.0	100.0|78.14	100.0|70.53	94.35
SGSM3	99.73|99.73	100.0|100.0	100.0|100.0	100.0|100.0	100.0|99.74	99.73|99.87	99.73|99.73	100.0|100.0	100.0|100.0	100.0|100.0	99.91
MICU1	100.0|100.0	100.0|100.0	99.79|100.0	30.37|100.0	100.0|100.0	99.81|100.0	27.43|100.0	99.81|100.0	27.43|100.0	30.23|99.32	85.71
POLE2	77.97|92.58	77.97|94.69	77.97|94.69	77.97|94.69	97.03|99.24	97.03|99.24	97.03|99.24	100.0|100.0	100.0|100.0	100.0|100.0	93.87
OBSL1	99.95|100.0	96.67|100.0	100.0|100.0	91.89|98.5	96.68|99.95	100.0|100.0	95.15|100.0	99.95|100.0	96.51|98.61	97.62|98.11	98.48
CRTAC1	87.24|94.15	86.8|91.78	87.98|92.02	78.89|93.73	96.84|94.88	96.04|93.1	84.97|93.55	94.11|93.1	88.37|99.3	81.44|92.51	91.04
SLC35C1	96.43|100.0	99.45|97.31	100.0|100.0	100.0|100.0	100.0|94.35	100.0|96.69	100.0|96.43	97.31|99.72	97.31|99.45	100.0|100.0	98.72
LOXL4	100.0|100.0	93.11|100.0	91.02|97.63	90.9|96.22	98.05|100.0	98.31|99.87	96.62|96.88	99.34|98.81	98.67|96.88	100.0|100.0	97.62
OPTC	100.0|100.0	100.0|100.0	100.0|85.83	100.0|100.0	100.0|100.0	100.0|85.56	100.0|100.0	99.69|85.56	100.0|100.0	85.56|100.0	97.11
SPHK2	90.45|98.51	90.86|89.04	79.81|94.81	85.13|80.72	97.92|88.1	94.06|100.0	98.22|85.51	81.55|98.87	100.0|97.02	97.57|77.88	91.3
LOC100467553	90.08|100.0	90.08|100.0	90.08|100.0	90.08|100.0	100.0|100.0	100.0|100.0	100.0|100.0	100.0|100.0	100.0|100.0	99.37|100.0	97.98
CHRNE	69.64|91.83	69.64|92.02	69.49|93.12	22.05|100.0	100.0|100.0	99.4|100.0	29.08|100.0	100.0|100.0	29.14|100.0	29.55|100.0	79.75
FOXA1	75.2|93.81	72.48|95.97	72.48|96.79	72.48|100.0	94.21|100.0	93.81|100.0	94.41|100.0	100.0|100.0	100.0|100.0	100.0|100.0	93.08
ZNF143	93.25|100.0	100.0|100.0	100.0|100.0	100.0|100.0	100.0|93.1	100.0|93.1	100.0|93.1	100.0|100.0	100.0|100.0	100.0|100.0	98.63
SCAF8	100.0|99.38	99.38|94.09	98.52|99.61	100.0|99.3	100.0|95.35	100.0|100.0	100.0|100.0	93.8|100.0	95.35|100.0	100.0|100.0	98.74
LRRFIP1	44.75|69.9	96.28|96.46	77.96|100.0	31.11|75.12	86.59|55.54	46.8|43.07	64.23|99.31	69.22|99.31	26.48|63.82	42.66|71.66	68.01
TRAF3IP1	97.92|100.0	99.58|94.72	97.36|100.0	95.28|100.0	100.0|91.82	100.0|100.0	99.42|100.0	100.0|100.0	90.77|100.0	96.02|100.0	98.14
TENT5D	97.95|98.71	100.0|100.0	100.0|100.0	100.0|100.0	98.71|97.95	97.93|97.18	98.71|97.95	100.0|100.0	100.0|100.0	100.0|100.0	99.25
WT1	66.78|46.42	77.08|73.65	66.78|38.88	66.78|44.47	73.21|100.0	100.0|87.23	100.0|100.0	100.0|64.6	100.0|73.89	87.43|100.0	78.36
LOC100476759	100.0|100.0	100.0|100.0	100.0|100.0	47.74|82.86	100.0|100.0	100.0|100.0	48.15|83.57	100.0|100.0	48.35|83.57	49.79|83.57	86.38
YARS2	100.0|100.0	100.0|100.0	100.0|100.0	100.0|100.0	100.0|100.0	100.0|100.0	100.0|100.0	100.0|100.0	100.0|100.0	100.0|100.0	100
PACSIN3	86.48|100.0	73.48|100.0	73.48|100.0	73.48|100.0	99.6|100.0	99.6|100.0	99.6|100.0	100.0|100.0	100.0|100.0	100.0|100.0	95.29
RASD1	100.0|100.0	65.95|54.44	100.0|100.0	70.61|100.0	65.95|54.44	100.0|100.0	70.61|100.0	54.73|66.07	59.47|100.0	70.71|100.0	81.65
KDM2A	100.0|100.0	100.0|100.0	100.0|100.0	98.88|100.0	100.0|100.0	100.0|100.0	98.88|100.0	100.0|100.0	98.88|100.0	98.97|100.0	99.78
AKNAD1	100.0|100.0	100.0|100.0	100.0|100.0	100.0|100.0	100.0|100.0	100.0|100.0	100.0|100.0	100.0|100.0	100.0|100.0	100.0|100.0	100
HERC1	100.0|100.0	100.0|100.0	100.0|100.0	53.81|99.28	100.0|100.0	100.0|100.0	53.81|98.97	100.0|100.0	53.61|99.28	53.8|99.24	90.59
RASGEF1B	85.05|100.0	85.05|100.0	96.58|95.89	85.23|100.0	100.0|100.0	100.0|84.62	100.0|100.0	100.0|84.62	100.0|100.0	84.62|100.0	95.08
GLRX2	68.12|69.43	89.38|91.08	52.5|49.41	76.88|100.0	100.0|100.0	75.16|69.41	78.34|100.0	75.16|69.41	78.34|100.0	49.41|68.29	78.02
GET3	100.0|100.0	100.0|100.0	100.0|100.0	100.0|100.0	100.0|100.0	100.0|100.0	100.0|100.0	100.0|100.0	100.0|100.0	100.0|100.0	100
CHRDL2	100.0|100.0	100.0|100.0	93.95|93.3	86.74|88.81	100.0|100.0	93.95|93.3	86.74|88.81	93.95|93.3	86.74|88.81	80.14|82.62	92.56
SLC49A4	100.0|100.0	100.0|100.0	100.0|100.0	70.59|90.32	100.0|100.0	100.0|100.0	70.29|90.32	100.0|100.0	70.44|90.32	70.29|90.32	92.14
COG8	100.0|100.0	96.15|97.56	94.55|92.19	94.87|95.18	96.15|97.4	95.67|93.12	100.0|100.0	96.26|92.5	97.07|95.98	89.22|91.8	95.78
OSMR	100.0|98.58	100.0|100.0	100.0|100.0	99.07|99.58	98.47|100.0	99.29|100.0	97.46|99.48	100.0|100.0	97.52|98.03	98.35|99.17	99.25
ERCC6L	98.26|100.0	98.34|100.0	99.21|100.0	96.92|100.0	100.0|100.0	100.0|100.0	98.54|99.92	100.0|100.0	98.55|100.0	99.84|100.0	99.48
P2RX6	97.47|98.22	73.48|95.72	92.93|94.6	97.22|97.96	75.83|98.03	93.13|94.09	100.0|100.0	92.43|72.24	98.03|75.83	94.6|93.64	91.77
PUS7	76.12|100.0	95.25|100.0	95.68|99.85	96.26|100.0	100.0|79.91	100.0|80.33	100.0|79.97	100.0|99.85	100.0|100.0	99.85|99.4	95.12
LRSAM1	89.64|91.61	89.64|92.24	89.64|91.61	89.64|91.61	100.0|100.0	100.0|100.0	100.0|100.0	100.0|100.0	100.0|100.0	100.0|100.0	96.28
MYCBPAP	100.0|100.0	97.06|93.8	100.0|100.0	100.0|94.35	96.64|93.5	100.0|100.0	100.0|94.44	94.41|98.62	93.5|91.27	100.0|94.54	97.11
ARL10	72.0|44.26	73.33|43.65	74.0|45.68	72.67|44.86	76.64|74.21	100.0|100.0	100.0|100.0	74.21|76.95	74.21|76.95	100.0|100.0	76.18
LIN37	73.21|100.0	100.0|100.0	73.21|100.0	76.49|100.0	100.0|73.21	100.0|100.0	100.0|100.0	73.21|100.0	76.49|100.0	100.0|100.0	92.29
SCARB1	77.36|83.89	76.99|66.2	77.36|83.89	76.99|81.26	92.93|73.68	100.0|100.0	92.34|89.87	73.68|92.93	72.9|89.48	92.34|89.87	84.2
QDPR	63.72|83.47	63.72|83.47	63.72|83.82	63.72|83.47	100.0|100.0	99.17|99.59	100.0|100.0	99.17|99.59	100.0|100.0	99.59|99.17	89.27
OSCP1	90.22|99.4	49.73|48.28	95.65|90.49	95.38|71.78	51.8|45.65	99.4|85.35	100.0|68.3	60.16|58.61	85.22|66.05	99.49|79.14	77.01
TMEM176A	57.51|80.57	57.51|65.68	53.47|75.82	57.51|81.89	97.57|79.54	95.95|97.13	97.98|99.59	79.54|98.77	80.86|100.0	98.77|99.18	82.74
SH2D1A	100.0|100.0	100.0|100.0	100.0|100.0	100.0|100.0	100.0|100.0	100.0|100.0	100.0|100.0	100.0|100.0	100.0|100.0	100.0|100.0	100
TAGLN	62.46|99.51	61.85|100.0	61.85|100.0	62.77|89.87	98.04|99.5	98.04|99.5	100.0|89.87	100.0|100.0	100.0|88.55	100.0|88.55	90.02
GBA2	86.81|95.45	90.26|100.0	90.06|99.67	90.65|99.68	95.45|96.18	95.45|96.08	95.45|95.45	99.78|99.67	100.0|99.68	100.0|99.46	96.26
ANKRD65	8.82|9.14	18.64|69.16	18.14|18.95	16.37|77.38	19.32|69.16	19.06|19.21	16.97|77.38	65.42|18.42	56.07|71.43	14.74|66.67	37.52
HNF4G	96.66|100.0	80.16|100.0	90.77|100.0	90.77|100.0	82.93|100.0	93.9|100.0	93.9|100.0	100.0|88.31	100.0|88.31	100.0|100.0	95.29
GPRC5D	46.27|99.33	46.27|86.63	46.27|86.63	47.67|91.92	99.33|86.63	99.33|86.63	99.33|89.22	99.13|99.13	86.63|89.22	86.63|89.22	83.07
RAMP2	51.6|99.48	46.79|100.0	48.4|95.77	46.79|98.87	100.0|100.0	100.0|100.0	97.42|100.0	100.0|100.0	98.29|97.18	100.0|100.0	89.03
FBXW7	74.01|78.81	77.06|79.48	73.87|78.45	71.75|86.28	82.34|79.75	79.52|79.3	76.41|86.28	79.75|82.11	73.87|86.12	76.2|86.28	79.38
PDE7B	84.36|95.52	100.0|100.0	98.61|100.0	79.41|100.0	94.39|84.2	93.95|84.14	88.34|100.0	100.0|100.0	79.2|100.0	79.12|100.0	93.06
SPEF1	68.8|100.0	68.8|100.0	68.8|100.0	69.1|100.0	100.0|100.0	100.0|100.0	100.0|99.58	100.0|100.0	100.0|100.0	100.0|100.0	93.75
RCOR1	87.53|95.21	86.31|86.52	87.04|74.17	82.89|96.31	97.87|90.2	100.0|78.33	94.15|100.0	100.0|85.0	86.27|100.0	73.33|100.0	90.06
NFKBIZ	62.48|86.94	62.48|86.82	63.67|87.64	61.78|100.0	100.0|100.0	100.0|100.0	86.11|100.0	100.0|100.0	86.13|100.0	86.4|100.0	88.52
TBX10	100.0|99.22	95.28|99.73	99.21|98.18	95.28|99.73	94.55|100.0	97.4|97.4	94.55|100.0	97.8|92.47	100.0|100.0	92.47|97.8	97.55
PAPOLG	98.52|97.68	88.81|97.7	89.05|97.97	88.81|97.7	87.56|97.16	87.8|97.43	87.56|97.16	100.0|100.0	100.0|100.0	100.0|100.0	95.55
DDX59	99.2|100.0	98.88|99.35	99.2|99.84	99.2|99.68	100.0|100.0	100.0|100.0	100.0|100.0	100.0|100.0	100.0|100.0	100.0|100.0	99.77
AADAT	77.13|100.0	77.13|100.0	72.96|93.06	77.86|100.0	100.0|100.0	94.59|93.06	100.0|100.0	93.88|92.36	100.0|100.0	92.13|92.77	92.85
SELPLG	99.33|100.0	100.0|100.0	25.84|27.58	99.33|100.0	100.0|100.0	28.61|27.58	100.0|100.0	25.97|27.34	100.0|100.0	33.33|33.57	71.42
IL4	100.0|100.0	100.0|100.0	100.0|100.0	100.0|100.0	100.0|100.0	100.0|100.0	100.0|100.0	100.0|100.0	100.0|100.0	100.0|100.0	100
PANK4	100.0|100.0	100.0|100.0	100.0|100.0	100.0|100.0	100.0|100.0	100.0|100.0	100.0|100.0	100.0|100.0	100.0|100.0	100.0|100.0	100
TMEM18	92.86|89.31	94.44|73.46	85.71|77.14	94.44|92.97	89.31|72.22	83.21|77.86	89.31|91.41	68.52|79.29	79.01|100.0	79.29|86.72	84.82
SLC38A11	100.0|81.23	100.0|100.0	100.0|96.03	100.0|99.12	83.57|100.0	81.05|99.12	81.41|99.34	100.0|99.12	100.0|99.34	97.35|97.14	95.69
CHORDC1	57.65|88.55	58.04|85.8	56.47|87.01	57.65|88.55	100.0|100.0	98.8|99.09	100.0|100.0	98.84|100.0	100.0|100.0	99.09|98.8	88.72
RING1	100.0|100.0	100.0|100.0	100.0|100.0	100.0|100.0	100.0|100.0	100.0|100.0	100.0|100.0	100.0|100.0	100.0|100.0	100.0|100.0	100
LOC100476823	63.05|100.0	100.0|100.0	87.74|100.0	47.33|100.0	100.0|59.54	100.0|70.83	72.53|100.0	79.93|94.05	43.23|100.0	51.63|100.0	83.49
SLC1A5	100.0|100.0	100.0|100.0	100.0|100.0	100.0|76.59	100.0|100.0	100.0|100.0	100.0|76.59	100.0|100.0	100.0|76.59	100.0|78.98	95.44
TXLNA	100.0|100.0	100.0|100.0	100.0|100.0	100.0|100.0	100.0|100.0	100.0|100.0	100.0|100.0	100.0|100.0	100.0|100.0	55.96|56.36	95.62
SNRK	99.58|94.71	94.3|81.98	97.5|93.72	99.58|98.49	94.97|86.82	100.0|100.0	100.0|100.0	88.27|97.59	86.82|98.76	100.0|100.0	95.65
PRKAB2	95.96|88.18	95.96|77.91	100.0|100.0	94.49|98.85	90.88|80.3	88.18|96.31	87.84|100.0	77.91|96.31	77.31|99.62	94.83|98.85	91.98
CRYAB	91.43|91.43	91.43|91.43	91.43|91.43	94.86|91.71	100.0|100.0	100.0|100.0	100.0|100.0	100.0|100.0	100.0|100.0	100.0|100.0	96.76
LPAR3	100.0|100.0	100.0|93.16	100.0|100.0	66.95|82.87	100.0|93.16	100.0|100.0	66.95|82.87	93.16|100.0	62.37|82.87	66.95|82.87	88.71
PDGFD	100.0|100.0	100.0|100.0	100.0|100.0	30.9|80.92	100.0|100.0	100.0|100.0	33.79|80.92	100.0|100.0	34.86|84.87	34.86|84.87	83.3
PCCA	93.84|100.0	100.0|100.0	100.0|100.0	45.69|97.66	100.0|93.84	100.0|94.61	48.76|97.66	100.0|100.0	45.75|97.66	46.55|98.54	88.03
PHTF1	98.16|99.6	100.0|100.0	100.0|100.0	95.54|96.68	99.6|98.16	99.6|98.29	96.94|96.68	100.0|100.0	95.54|96.68	95.66|96.68	98.19
TMEM8B	99.44|100.0	88.22|83.17	85.97|82.28	85.97|78.64	88.94|83.39	86.79|82.6	86.68|78.85	87.3|88.61	87.2|84.6	100.0|95.59	87.71
CKAP5	100.0|100.0	100.0|100.0	100.0|100.0	100.0|100.0	100.0|100.0	100.0|100.0	100.0|100.0	100.0|100.0	100.0|100.0	100.0|100.0	100
DCAF10	82.09|82.24	78.72|86.72	82.45|82.16	79.96|99.56	100.0|100.0	81.88|81.45	80.11|99.56	86.72|78.45	86.72|98.01	79.51|99.34	87.28
LMNA	84.71|100.0	84.71|100.0	84.97|100.0	88.66|99.57	100.0|100.0	100.0|100.0	100.0|95.14	100.0|100.0	100.0|95.14	100.0|95.28	96.41
C14H22orf15	48.44|94.59	52.25|76.65	50.52|96.69	50.52|90.12	73.65|55.33	100.0|98.68	100.0|91.36	63.45|82.78	55.33|67.28	100.0|95.68	77.17
CD3D	86.08|98.82	86.08|97.66	85.05|95.38	86.08|98.82	100.0|100.0	100.0|98.84	100.0|100.0	100.0|98.84	100.0|100.0	98.84|100.0	96.52
B4GALNT2	100.0|100.0	100.0|100.0	99.4|97.84	94.82|100.0	100.0|100.0	99.4|97.84	94.82|100.0	100.0|97.84	100.0|100.0	92.75|99.37	98.7
APOB	99.98|96.54	100.0|97.67	100.0|98.82	100.0|96.84	99.2|100.0	100.0|100.0	99.96|100.0	100.0|100.0	99.44|98.59	100.0|100.0	99.35
AVPI1	100.0|100.0	99.32|100.0	100.0|100.0	100.0|100.0	99.32|100.0	100.0|100.0	100.0|100.0	100.0|100.0	100.0|100.0	100.0|100.0	99.93
TMCO1	100.0|100.0	100.0|100.0	92.55|87.0	57.45|77.14	100.0|100.0	92.55|87.0	57.45|77.14	92.55|87.0	57.45|77.14	54.0|77.14	83.68
BEND6	100.0|100.0	100.0|100.0	99.28|98.58	100.0|100.0	100.0|100.0	99.31|100.0	100.0|100.0	99.28|98.58	100.0|100.0	98.58|99.28	99.64
INTS7	98.57|100.0	98.57|100.0	96.41|97.41	85.86|100.0	100.0|100.0	97.82|97.41	87.11|100.0	97.82|97.41	87.11|100.0	84.58|97.49	96.18
C15H12orf66	100.0|100.0	100.0|100.0	100.0|100.0	100.0|100.0	100.0|100.0	100.0|100.0	100.0|100.0	100.0|100.0	100.0|100.0	100.0|100.0	100
CCR7	100.0|100.0	100.0|100.0	100.0|100.0	99.21|97.41	100.0|100.0	100.0|100.0	99.21|97.41	100.0|100.0	99.21|97.41	99.74|97.67	99.36
NUP54	91.54|82.74	100.0|100.0	100.0|100.0	92.13|83.13	81.32|89.96	82.74|91.18	100.0|100.0	100.0|100.0	90.35|81.53	91.18|82.59	92.02
LOC100473935	100.0|100.0	100.0|100.0	100.0|100.0	100.0|100.0	100.0|100.0	100.0|100.0	100.0|100.0	100.0|100.0	100.0|100.0	100.0|100.0	100
NUDC	100.0|100.0	100.0|100.0	100.0|100.0	100.0|86.6	100.0|100.0	100.0|100.0	100.0|86.6	100.0|100.0	100.0|86.6	100.0|86.6	97.32
ZC3H8	79.13|100.0	77.61|100.0	77.35|99.67	77.61|100.0	100.0|100.0	99.68|100.0	100.0|100.0	99.67|99.67	100.0|100.0	99.67|99.67	95.49
TGS1	92.96|99.87	100.0|100.0	100.0|100.0	100.0|100.0	99.87|92.96	100.0|93.2	99.87|92.96	100.0|100.0	100.0|100.0	99.65|99.77	98.56
RGN	100.0|85.92	100.0|100.0	100.0|100.0	100.0|81.92	85.92|100.0	85.92|100.0	87.64|83.56	100.0|100.0	100.0|81.92	100.0|81.92	93.74
GCH1	100.0|100.0	100.0|100.0	95.98|99.17	100.0|71.35	100.0|100.0	82.61|86.72	100.0|75.93	96.09|100.0	100.0|73.35	99.17|68.48	92.44
LOC100466952	95.03|94.44	100.0|100.0	94.41|100.0	94.41|100.0	100.0|100.0	93.83|100.0	93.83|100.0	100.0|100.0	100.0|100.0	100.0|100.0	98.3
LIMCH1	81.15|100.0	100.0|95.76	100.0|91.79	100.0|98.14	100.0|98.79	100.0|100.0	100.0|100.0	98.72|97.15	98.86|100.0	96.82|100.0	97.86
NDN	100.0|100.0	100.0|100.0	100.0|100.0	66.46|100.0	100.0|100.0	100.0|100.0	66.46|100.0	100.0|100.0	66.46|100.0	66.46|100.0	93.29
LOC100483022	100.0|100.0	77.05|100.0	99.2|99.2	100.0|100.0	77.05|100.0	99.2|99.2	100.0|100.0	100.0|77.05	100.0|77.05	100.0|100.0	95.25
PLEKHG1	96.41|96.81	96.41|97.34	97.09|97.95	85.18|99.45	98.51|99.04	97.08|97.54	85.46|99.37	100.0|100.0	86.0|99.45	86.69|100.0	95.79
MTRF1L	99.74|99.74	99.74|99.74	100.0|100.0	99.74|99.74	100.0|100.0	100.0|100.0	100.0|100.0	100.0|100.0	100.0|100.0	100.0|100.0	99.92
AARS2	100.0|97.82	100.0|100.0	100.0|100.0	100.0|100.0	97.82|100.0	97.82|100.0	97.82|100.0	100.0|100.0	100.0|100.0	100.0|100.0	99.56
TNFRSF9	100.0|100.0	100.0|98.46	94.9|94.53	100.0|99.61	100.0|100.0	97.97|94.14	100.0|100.0	93.44|94.53	100.0|100.0	94.14|94.14	97.79
RBFOX2	68.36|76.67	68.36|76.67	68.36|68.82	61.95|77.56	100.0|100.0	96.77|86.86	89.58|100.0	96.77|86.86	89.58|100.0	80.4|100.0	84.68
PAX9	93.28|99.72	93.28|99.72	88.11|99.71	53.75|80.62	100.0|100.0	94.48|100.0	57.46|80.62	94.48|100.0	57.46|80.62	60.82|80.62	85.74
TMF1	100.0|100.0	100.0|100.0	100.0|100.0	100.0|100.0	100.0|100.0	100.0|100.0	100.0|100.0	100.0|100.0	100.0|100.0	100.0|100.0	100
VIPR1	94.99|93.97	90.85|100.0	99.78|99.78	94.99|88.62	84.7|94.24	94.18|95.21	88.79|83.74	100.0|91.07	100.0|84.76	98.47|91.87	93.5
FRMPD4	96.97|100.0	100.0|76.17	98.87|73.51	88.8|96.71	98.91|68.78	100.0|72.05	91.57|96.62	99.35|100.0	63.68|96.62	66.03|96.71	89.07
GPR157	39.43|64.11	39.25|62.28	39.62|63.64	39.43|62.39	99.69|97.31	100.0|99.09	99.69|97.01	100.0|100.0	99.1|98.81	100.0|100.0	80.04
ASTL	96.22|100.0	99.33|100.0	97.11|100.0	99.33|100.0	99.31|96.41	99.77|99.31	99.31|96.41	96.86|99.31	100.0|100.0	99.31|96.86	98.74
SLC11A2	97.16|97.48	97.16|97.48	94.98|100.0	97.49|84.86	100.0|100.0	95.3|100.0	97.48|84.57	95.3|100.0	99.33|86.17	100.0|82.68	95.37
UVSSA	86.93|88.53	89.15|88.17	87.48|87.73	86.23|89.08	100.0|100.0	100.0|100.0	100.0|100.0	100.0|100.0	99.31|100.0	100.0|100.0	95.13
TMED1	84.0|92.51	84.0|92.51	84.0|92.51	84.0|92.51	100.0|100.0	100.0|100.0	100.0|100.0	100.0|100.0	100.0|100.0	100.0|100.0	95.3
BCAR1	96.75|99.54	96.75|99.54	97.65|99.66	29.6|84.08	100.0|100.0	100.0|100.0	29.99|82.8	100.0|100.0	29.99|82.8	30.09|83.76	82.15
ZC3H13	100.0|100.0	100.0|100.0	100.0|100.0	100.0|100.0	100.0|100.0	100.0|100.0	100.0|100.0	100.0|100.0	100.0|100.0	100.0|100.0	100
FAM199X	100.0|100.0	100.0|100.0	100.0|100.0	100.0|100.0	100.0|100.0	100.0|100.0	100.0|100.0	100.0|100.0	100.0|100.0	100.0|100.0	100
TMEM101	100.0|100.0	100.0|100.0	100.0|100.0	100.0|100.0	100.0|100.0	100.0|100.0	100.0|100.0	100.0|100.0	100.0|100.0	100.0|100.0	100
ING5	100.0|100.0	83.33|83.68	100.0|100.0	88.75|100.0	83.33|83.68	100.0|100.0	88.75|100.0	83.68|83.33	83.68|93.9	88.75|100.0	92.24
MCM8	98.58|100.0	98.58|100.0	98.58|100.0	98.58|92.17	100.0|100.0	100.0|100.0	100.0|91.84	100.0|100.0	100.0|91.84	100.0|91.84	98.1
SLC31A1	82.11|98.06	76.83|100.0	58.94|73.98	72.36|100.0	92.72|100.0	67.96|71.43	67.96|78.65	76.72|73.98	77.78|82.58	73.98|81.46	80.38
BCL3	56.71|70.39	54.24|70.09	57.6|72.77	51.94|69.34	89.25|92.92	99.12|100.0	89.25|95.99	98.4|96.21	96.35|99.53	94.2|99.53	82.69
PPP1R1C	100.0|100.0	100.0|100.0	100.0|100.0	46.55|100.0	100.0|100.0	100.0|100.0	43.12|92.16	100.0|100.0	43.12|92.16	43.52|92.16	87.64
CFAP99	76.18|90.98	81.18|99.53	78.1|94.14	73.5|92.73	100.0|100.0	97.86|98.77	85.02|89.82	95.29|93.67	87.13|89.66	85.96|89.98	89.98
L3MBTL2	100.0|100.0	100.0|100.0	97.88|93.64	100.0|100.0	100.0|100.0	98.16|93.91	100.0|100.0	97.88|93.78	100.0|100.0	93.64|98.02	98.35
MAPK8IP1	100.0|99.15	99.57|98.86	100.0|99.01	100.0|98.75	96.59|96.86	97.16|96.61	98.44|96.11	100.0|100.0	100.0|100.0	100.0|100.0	98.86
TSPAN18	94.35|90.7	100.0|100.0	100.0|100.0	100.0|100.0	90.7|94.35	90.7|94.35	90.7|94.35	100.0|100.0	100.0|100.0	100.0|100.0	97.01
RBFA	72.43|68.55	100.0|52.35	84.39|72.57	NA	68.87|38.09	59.43|54.0	NA	44.52|73.14	42.61|77.53	NA	64.89
CCRL2	99.14|82.78	100.0|100.0	99.14|96.11	99.43|99.14	82.78|99.14	84.93|98.61	84.69|100.0	98.85|95.83	97.42|97.14	99.44|100.0	95.73
HMBS	100.0|100.0	100.0|100.0	99.45|99.45	100.0|100.0	100.0|100.0	99.45|99.45	100.0|100.0	99.45|99.45	100.0|100.0	99.45|99.45	99.78
BCL9	100.0|100.0	100.0|100.0	100.0|100.0	100.0|94.94	100.0|100.0	100.0|100.0	100.0|94.94	100.0|100.0	100.0|94.94	100.0|94.94	98.99
MCF2	100.0|100.0	86.96|98.29	92.72|95.15	97.07|100.0	85.66|97.65	93.44|96.7	96.16|100.0	99.15|90.01	98.29|91.36	88.65|90.76	94.9
GJA3	100.0|100.0	100.0|100.0	98.88|100.0	100.0|100.0	100.0|100.0	100.0|100.0	100.0|100.0	100.0|100.0	100.0|100.0	100.0|100.0	99.94
TRIM21	99.79|100.0	99.79|94.55	98.72|100.0	100.0|97.3	100.0|94.55	98.5|99.78	100.0|97.1	93.13|99.78	94.55|97.1	99.78|95.64	98
CX3CL1	100.0|100.0	100.0|100.0	100.0|100.0	91.53|100.0	100.0|100.0	100.0|100.0	91.97|100.0	100.0|100.0	83.92|100.0	91.14|100.0	97.93
ABHD11	77.26|84.66	77.26|87.17	77.26|86.32	77.26|87.17	97.12|100.0	98.08|100.0	97.12|100.0	100.0|100.0	100.0|100.0	100.0|100.0	92.33
RHPN2	100.0|100.0	100.0|100.0	100.0|100.0	94.35|100.0	100.0|100.0	100.0|100.0	92.42|100.0	100.0|100.0	92.42|100.0	92.42|100.0	98.58
ACSF2	90.92|97.23	96.11|96.42	96.11|96.42	100.0|96.41	100.0|93.82	99.65|93.5	100.0|90.16	100.0|100.0	100.0|100.0	100.0|100.0	97.34
LOC100464768	99.6|100.0	100.0|100.0	99.6|99.8	99.8|99.8	100.0|99.6	100.0|99.8	100.0|99.6	99.6|99.8	100.0|100.0	99.8|99.6	99.82
MLLT1	85.59|97.52	90.45|94.41	90.45|98.72	85.59|97.52	100.0|91.61	100.0|95.8	100.0|100.0	96.68|100.0	91.61|100.0	95.8|100.0	95.59
SLC24A1	3.16|2.8	3.16|2.67	3.16|2.74	3.16|2.62	100.0|100.0	100.0|100.0	100.0|100.0	100.0|100.0	100.0|100.0	100.0|100.0	61.17
SELENOW	100.0|100.0	100.0|93.55	98.85|97.73	100.0|100.0	100.0|94.62	98.86|98.86	100.0|100.0	92.47|97.73	93.55|100.0	97.73|98.85	98.14
TAF1	94.32|98.53	94.37|97.46	96.48|100.0	96.23|100.0	100.0|100.0	100.0|100.0	100.0|100.0	100.0|100.0	100.0|100.0	100.0|100.0	98.87
PECAM1	92.03|100.0	94.27|99.61	89.66|98.36	89.54|81.52	100.0|98.03	97.43|98.36	97.29|81.52	95.53|99.18	95.13|81.97	96.86|80.39	93.33
OPA1	100.0|100.0	100.0|100.0	100.0|100.0	98.13|93.87	100.0|100.0	100.0|100.0	98.13|93.87	100.0|100.0	98.13|93.87	99.9|93.87	98.49
ACER2	62.08|100.0	62.08|100.0	62.08|100.0	44.92|69.1	100.0|100.0	100.0|100.0	72.36|69.1	100.0|100.0	72.36|69.1	72.36|69.1	81.23
SESN3	81.5|94.34	81.5|94.92	81.5|94.92	81.85|100.0	95.15|95.73	95.15|95.73	94.75|100.0	100.0|100.0	95.33|100.0	95.33|100.0	93.89
LHX2	86.21|86.21	86.21|86.21	85.71|85.71	86.21|92.11	86.21|86.21	85.71|85.71	86.21|92.11	85.71|85.71	86.21|92.11	85.71|91.58	87.19
STT3B	100.0|100.0	100.0|100.0	100.0|100.0	87.29|100.0	100.0|100.0	100.0|100.0	87.29|100.0	100.0|100.0	87.29|100.0	87.61|100.0	97.47
RBM42	85.55|100.0	86.87|97.06	86.87|96.86	86.87|97.06	100.0|100.0	100.0|99.79	100.0|100.0	100.0|99.79	100.0|100.0	99.79|100.0	96.83
TSPAN12	100.0|100.0	100.0|100.0	100.0|100.0	100.0|100.0	100.0|100.0	100.0|100.0	100.0|100.0	100.0|100.0	100.0|100.0	100.0|100.0	100
PALM3	6.28|4.63	100.0|65.95	100.0|65.67	100.0|68.29	4.63|4.13	63.0|53.81	60.77|52.99	100.0|100.0	100.0|100.0	100.0|100.0	67.51
KCNV2	79.44|100.0	100.0|100.0	100.0|100.0	100.0|100.0	100.0|76.03	100.0|75.62	100.0|79.59	100.0|100.0	98.39|100.0	98.4|100.0	95.37
PEX14	70.08|97.06	69.88|87.02	70.46|97.07	61.39|98.76	96.79|87.02	100.0|100.0	85.03|98.76	87.5|96.81	76.44|98.76	85.11|99.38	88.17
SPATA4	100.0|42.81	71.54|32.98	88.46|38.98	27.69|17.22	87.25|94.68	93.79|97.29	68.3|100.0	95.39|91.19	74.11|100.0	70.85|100.0	74.63
FCHO2	100.0|99.88	99.88|98.52	99.88|98.76	45.0|99.17	100.0|98.77	100.0|99.01	44.94|99.17	100.0|100.0	44.39|99.17	44.75|99.72	88.55
GLI2	100.0|100.0	100.0|100.0	100.0|100.0	95.93|100.0	100.0|100.0	100.0|100.0	97.08|100.0	100.0|100.0	96.79|100.0	98.9|100.0	99.44
PTPDC1	91.52|96.66	100.0|100.0	91.65|89.6	100.0|100.0	96.52|91.39	100.0|100.0	96.52|91.39	91.27|89.23	100.0|100.0	89.23|91.27	95.31
RNF214	99.44|100.0	99.58|100.0	88.43|87.82	99.44|100.0	100.0|100.0	88.94|87.82	100.0|100.0	88.79|87.68	100.0|100.0	87.68|88.92	95.23
KLHL15	99.34|99.67	99.17|94.48	100.0|100.0	100.0|100.0	99.5|94.48	99.67|99.34	99.67|99.34	94.48|99.17	94.48|99.17	100.0|100.0	98.6
GPR155	100.0|100.0	100.0|100.0	100.0|100.0	100.0|100.0	100.0|100.0	99.88|100.0	100.0|100.0	100.0|100.0	100.0|100.0	100.0|100.0	99.99
CLEC9A	50.96|99.59	50.96|99.59	56.26|100.0	39.28|90.24	100.0|100.0	100.0|100.0	76.35|89.76	100.0|100.0	76.35|89.76	78.41|100.0	84.88
ZC3HAV1L	100.0|85.26	100.0|68.35	97.53|53.38	100.0|71.05	92.63|74.26	90.53|58.11	95.79|79.82	90.3|72.3	92.41|96.05	72.3|93.86	84.2
CREG2	100.0|63.83	100.0|63.83	100.0|64.93	100.0|81.74	100.0|100.0	100.0|100.0	81.21|99.57	100.0|100.0	81.21|99.57	81.94|100.0	90.89
MFSD10	91.26|98.46	91.87|91.5	92.48|99.78	86.18|92.98	100.0|92.31	100.0|100.0	100.0|100.0	92.31|100.0	92.31|100.0	100.0|100.0	96.07
TSPAN31	100.0|87.5	100.0|100.0	100.0|100.0	100.0|100.0	87.5|100.0	87.5|100.0	87.5|100.0	100.0|100.0	100.0|100.0	100.0|100.0	97.5
ORAI1	80.33|83.68	84.67|83.83	85.0|83.88	84.67|83.83	83.68|79.54	83.33|78.95	83.33|79.21	100.0|100.0	83.83|83.83	82.89|83.17	84.58
LOC109490469	79.78|50.34	99.45|98.91	98.91|98.91	98.91|65.82	51.03|80.43	51.38|81.42	48.97|51.64	100.0|100.0	98.37|65.82	90.71|60.36	78.56
CLEC11A	74.6|100.0	74.6|100.0	75.75|100.0	74.6|100.0	100.0|100.0	100.0|100.0	100.0|100.0	100.0|100.0	100.0|100.0	100.0|100.0	94.98
KIFC2	93.78|93.53	100.0|94.28	100.0|94.44	85.64|94.37	100.0|94.79	97.38|89.27	79.75|88.13	95.3|94.7	77.13|92.39	77.4|93.3	91.78
PIK3CA	100.0|100.0	100.0|100.0	100.0|100.0	100.0|100.0	100.0|100.0	100.0|100.0	100.0|100.0	100.0|100.0	100.0|100.0	100.0|100.0	100
PDILT	100.0|100.0	100.0|100.0	100.0|100.0	86.9|98.44	100.0|100.0	100.0|100.0	86.4|98.05	100.0|100.0	86.9|98.44	85.71|98.44	96.96
REXO1	99.23|96.69	98.81|95.72	98.72|95.71	19.47|81.79	97.85|97.28	96.19|95.71	18.97|81.79	100.0|100.0	18.86|81.79	18.88|81.79	78.76
TNFRSF25	62.9|94.25	87.42|97.16	82.52|94.16	63.33|92.52	99.68|73.93	90.73|69.1	97.12|94.7	92.89|95.38	71.8|94.39	65.94|84.42	85.22
VSTM2B	46.37|51.04	55.52|58.28	45.43|50.53	55.52|46.19	60.42|57.62	100.0|100.0	60.42|45.67	56.62|60.0	67.22|53.28	60.0|44.88	58.75
TAPBP	99.33|96.54	100.0|100.0	100.0|96.78	100.0|100.0	96.54|99.33	99.35|98.5	100.0|99.36	100.0|96.57	100.0|100.0	100.0|100.0	99.12
NCOA2	77.81|99.51	93.24|99.86	93.24|100.0	88.07|99.71	99.67|83.47	99.67|83.58	100.0|88.59	100.0|100.0	94.47|99.86	94.6|99.86	94.76
PKDCC	58.1|100.0	77.67|100.0	100.0|100.0	58.1|100.0	100.0|76.56	100.0|59.76	100.0|100.0	98.7|77.03	76.56|100.0	59.76|100.0	87.11
ANKRD29	100.0|97.67	100.0|97.87	98.98|94.17	100.0|95.77	100.0|100.0	100.0|97.41	98.01|96.09	100.0|100.0	98.18|100.0	95.47|96.09	98.29
SLC38A3	100.0|100.0	100.0|100.0	100.0|100.0	100.0|100.0	100.0|100.0	100.0|100.0	100.0|100.0	100.0|100.0	100.0|100.0	100.0|100.0	100
MRPL57	95.1|65.54	99.02|99.02	99.02|99.02	99.02|99.02	65.54|95.1	66.89|97.06	66.89|97.06	100.0|100.0	100.0|100.0	100.0|100.0	92.17
USP26	100.0|100.0	100.0|100.0	99.89|100.0	100.0|100.0	100.0|100.0	99.15|100.0	100.0|100.0	100.0|100.0	100.0|100.0	100.0|98.48	99.88
LEXM	99.75|99.75	99.75|99.75	99.0|95.65	99.75|72.94	100.0|100.0	99.25|95.89	100.0|73.13	99.25|95.89	100.0|73.13	95.89|72.58	93.57
ELP5	99.68|97.21	94.92|100.0	94.92|99.67	100.0|74.47	92.88|100.0	92.88|100.0	93.5|71.39	100.0|99.67	100.0|70.69	99.67|70.69	92.61
MRPS6	76.92|88.71	76.22|75.69	76.92|88.0	76.92|95.65	87.9|75.69	100.0|99.2	92.74|100.0	77.08|88.8	75.69|94.78	92.0|100.0	86.95
USHBP1	100.0|100.0	100.0|100.0	98.86|100.0	100.0|100.0	100.0|100.0	99.0|100.0	100.0|100.0	99.02|100.0	100.0|100.0	100.0|100.0	99.84
PDCD4	100.0|100.0	100.0|100.0	100.0|100.0	96.8|97.84	100.0|100.0	100.0|100.0	96.8|97.84	100.0|100.0	96.8|97.84	96.8|97.84	98.93
IDH3A	18.03|100.0	86.34|100.0	100.0|95.31	97.54|83.41	100.0|20.89	100.0|17.19	100.0|15.42	100.0|82.29	100.0|73.83	92.97|83.41	78.33
MYSM1	100.0|97.12	99.01|96.05	100.0|99.02	100.0|87.85	99.4|99.28	99.4|100.0	100.0|90.78	98.44|100.0	99.28|89.91	100.0|90.24	97.29
PLAAT1	93.37|100.0	93.37|100.0	92.82|100.0	93.37|100.0	100.0|100.0	99.41|100.0	100.0|100.0	99.41|100.0	100.0|100.0	100.0|99.4	98.56
PITX3	100.0|96.18	100.0|100.0	100.0|100.0	100.0|100.0	96.18|100.0	96.18|100.0	96.18|100.0	100.0|100.0	100.0|100.0	100.0|100.0	99.24
TTC9C	76.5|78.21	76.5|72.54	76.5|81.87	76.5|46.05	96.65|89.64	95.53|100.0	97.77|57.57	88.6|100.0	89.64|56.91	100.0|56.25	80.66
CHST14	45.58|86.44	45.58|86.44	45.58|86.44	45.58|92.59	100.0|100.0	100.0|100.0	100.0|100.0	100.0|100.0	100.0|100.0	100.0|100.0	86.71
KLHDC2	100.0|100.0	82.27|100.0	100.0|100.0	100.0|91.03	82.27|100.0	100.0|100.0	100.0|91.03	100.0|82.27	100.0|74.89	100.0|91.03	94.74
DESI1	100.0|99.41	82.14|68.32	100.0|100.0	100.0|100.0	81.66|68.32	99.41|100.0	99.41|100.0	68.32|82.14	68.32|82.14	100.0|100.0	89.98
ETV1	94.09|96.86	100.0|100.0	94.09|96.86	81.26|98.76	96.86|94.09	100.0|100.0	83.65|98.76	94.09|96.86	81.26|98.76	83.65|98.76	94.43
SPRY1	95.61|95.61	95.61|84.25	95.61|97.44	95.61|98.07	100.0|88.12	100.0|100.0	100.0|100.0	88.12|100.0	88.12|100.0	100.0|100.0	96.11
STX17	87.54|100.0	87.54|100.0	87.54|100.0	87.54|100.0	100.0|100.0	100.0|100.0	100.0|100.0	100.0|100.0	100.0|100.0	100.0|100.0	97.51
PRLH	100.0|100.0	100.0|100.0	86.21|87.21	100.0|100.0	100.0|100.0	91.95|93.02	100.0|100.0	91.95|93.02	100.0|100.0	93.02|91.95	96.42
AK9	100.0|97.86	23.93|36.8	100.0|100.0	33.93|92.84	93.37|100.0	97.35|100.0	33.01|92.69	36.8|24.13	52.17|92.84	34.05|92.41	71.71
TAF5L	97.24|100.0	99.69|100.0	97.24|100.0	97.24|100.0	100.0|92.76	100.0|100.0	100.0|100.0	92.76|100.0	92.76|100.0	100.0|100.0	98.48
CLDN12	100.0|100.0	100.0|100.0	100.0|100.0	100.0|100.0	100.0|100.0	100.0|100.0	100.0|100.0	100.0|100.0	100.0|100.0	100.0|100.0	100
RASGEF1C	79.12|90.3	77.35|93.78	77.52|93.39	77.35|93.78	94.14|100.0	94.34|99.57	94.14|100.0	100.0|99.36	100.0|100.0	99.36|100.0	93.18
CCDC115	100.0|88.24	100.0|89.55	100.0|100.0	99.44|89.05	96.57|98.01	88.24|100.0	98.04|99.5	88.06|98.33	99.5|99.5	98.33|88.06	95.92
ZNF423	95.72|100.0	95.72|100.0	100.0|99.46	86.21|96.43	100.0|100.0	99.59|94.35	90.03|95.99	99.59|94.35	90.03|95.99	85.29|95.99	95.74
IDH1	100.0|100.0	100.0|100.0	100.0|100.0	100.0|98.57	100.0|100.0	100.0|100.0	100.0|98.57	100.0|100.0	100.0|98.57	100.0|98.57	99.71
HIVEP2	100.0|100.0	100.0|100.0	100.0|100.0	100.0|100.0	100.0|100.0	100.0|100.0	100.0|100.0	100.0|100.0	100.0|100.0	100.0|100.0	100
ANAPC1	98.43|99.9	98.43|99.9	98.43|99.9	46.48|93.29	100.0|100.0	100.0|100.0	47.17|93.29	100.0|100.0	47.17|93.29	47.17|93.29	87.81
PKHD1L1	99.6|99.74	97.3|98.39	99.84|100.0	34.69|100.0	98.12|99.07	100.0|100.0	35.07|100.0	98.79|98.02	34.89|100.0	34.6|100.0	86.41
NAT8L	60.37|100.0	69.35|100.0	100.0|100.0	64.71|100.0	99.43|85.71	99.43|58.19	100.0|87.5	100.0|67.89	92.61|94.0	62.88|94.0	86.8
ALDH7A1	92.76|99.8	100.0|100.0	100.0|100.0	100.0|100.0	100.0|93.32	99.8|92.76	99.8|92.76	100.0|100.0	100.0|100.0	100.0|100.0	98.55
EEF2KMT	76.05|90.59	76.05|90.59	76.05|91.94	59.26|100.0	100.0|100.0	100.0|100.0	70.59|100.0	100.0|100.0	70.59|100.0	71.64|100.0	88.67
DCTN3	100.0|100.0	100.0|100.0	100.0|100.0	100.0|100.0	100.0|100.0	100.0|100.0	100.0|100.0	100.0|100.0	100.0|100.0	100.0|100.0	100
CDKAL1	89.1|83.47	100.0|93.68	98.96|98.96	16.61|93.2	83.79|83.79	87.2|93.08	15.56|93.2	92.71|98.96	15.56|93.2	16.61|93.2	77.04
IRF2BP2	76.22|100.0	67.45|100.0	100.0|100.0	53.63|89.33	88.39|100.0	100.0|78.77	79.24|99.72	97.98|68.07	89.65|99.72	55.96|89.61	86.69
CCDC78	80.32|100.0	98.39|100.0	87.74|100.0	89.35|100.0	100.0|96.48	100.0|100.0	100.0|91.49	98.24|100.0	100.0|100.0	100.0|90.89	96.65
LOC100463765	49.63|71.66	49.63|71.66	49.63|71.66	49.63|71.66	100.0|100.0	100.0|100.0	100.0|100.0	100.0|100.0	100.0|100.0	100.0|100.0	84.26
STKLD1	96.94|97.36	100.0|100.0	97.67|100.0	88.92|100.0	92.53|96.64	91.36|94.26	87.99|100.0	97.25|96.07	88.23|96.33	87.31|96.49	95.27
FLCN	77.41|100.0	80.75|100.0	77.41|100.0	79.41|100.0	100.0|95.86	100.0|100.0	100.0|100.0	95.86|100.0	98.34|100.0	100.0|100.0	95.25
LSM2	87.65|34.63	87.65|31.84	87.65|54.2	87.65|74.74	84.39|77.58	45.85|71.76	46.34|100.0	42.15|71.76	42.6|100.0	71.76|98.95	69.96
VPS9D1	91.06|100.0	96.92|91.96	97.07|96.92	32.51|65.94	99.83|86.26	100.0|91.08	35.7|65.94	91.67|96.46	30.7|65.62	32.62|66.25	76.73
NSFL1C	100.0|100.0	100.0|100.0	100.0|100.0	100.0|100.0	100.0|100.0	100.0|100.0	100.0|100.0	100.0|100.0	100.0|100.0	100.0|100.0	100
RXFP2	97.96|95.88	100.0|95.1	100.0|100.0	50.75|62.65	99.07|96.26	95.88|97.96	49.8|62.81	95.1|100.0	48.39|62.81	50.75|62.65	81.19
TCAP	79.05|99.4	79.05|99.4	79.05|99.4	79.05|100.0	100.0|100.0	100.0|100.0	100.0|100.0	100.0|100.0	100.0|100.0	100.0|100.0	95.72
FAM184B	75.52|100.0	77.26|100.0	77.62|100.0	74.08|98.84	100.0|97.75	100.0|100.0	98.66|99.23	100.0|100.0	95.88|98.84	100.0|99.61	94.66
FAM189A1	72.52|99.77	73.18|84.67	74.34|87.18	55.96|99.71	100.0|84.1	100.0|86.6	77.22|100.0	100.0|100.0	64.94|100.0	67.57|100.0	86.39
C15H12orf50	89.34|100.0	88.49|100.0	100.0|100.0	88.7|100.0	100.0|100.0	100.0|89.34	100.0|100.0	100.0|88.49	100.0|100.0	88.7|100.0	96.65
PTCH2	100.0|100.0	100.0|100.0	97.93|100.0	100.0|100.0	100.0|100.0	97.93|100.0	100.0|100.0	97.93|100.0	100.0|100.0	100.0|97.93	99.59
TRAPPC12	86.39|88.64	100.0|100.0	100.0|100.0	100.0|100.0	88.64|86.61	90.21|86.7	88.64|91.63	100.0|100.0	100.0|100.0	99.25|100.0	95.34
TMEM17	100.0|100.0	100.0|100.0	100.0|100.0	100.0|75.0	100.0|100.0	100.0|100.0	100.0|75.0	100.0|100.0	100.0|78.41	100.0|75.0	95.17
KMT5B	100.0|97.02	99.66|100.0	99.89|100.0	59.12|100.0	94.15|100.0	94.47|100.0	55.85|100.0	100.0|100.0	59.46|100.0	59.57|100.0	90.96
MED25	7.75|4.9	100.0|89.81	100.0|89.01	100.0|83.55	93.18|97.99	92.94|97.0	93.42|91.13	99.75|99.0	100.0|93.0	99.25|92.77	86.22
WNK3	73.5|97.4	73.54|93.98	73.54|94.3	43.55|89.68	100.0|100.0	100.0|100.0	64.01|99.46	100.0|100.0	61.73|99.46	61.93|99.46	86.28
TOE1	100.0|100.0	100.0|100.0	100.0|100.0	100.0|100.0	100.0|100.0	100.0|100.0	100.0|100.0	100.0|100.0	100.0|100.0	100.0|100.0	100
C1D	100.0|100.0	100.0|100.0	100.0|100.0	100.0|100.0	100.0|100.0	100.0|100.0	100.0|100.0	100.0|100.0	100.0|100.0	100.0|100.0	100
DDA1	56.17|100.0	56.49|100.0	56.49|100.0	56.17|100.0	100.0|60.84	100.0|99.02	100.0|100.0	61.45|100.0	60.84|100.0	99.02|100.0	85.32
NANOS3	65.18|82.49	65.18|80.66	64.73|81.46	65.18|82.02	100.0|100.0	100.0|100.0	100.0|100.0	100.0|100.0	81.77|83.15	100.0|100.0	87.59
MEOX1	91.37|100.0	91.37|100.0	91.73|100.0	91.37|100.0	100.0|100.0	100.0|100.0	100.0|100.0	100.0|100.0	100.0|100.0	100.0|100.0	98.29
FN3KRP	85.11|74.08	100.0|100.0	99.35|99.35	89.32|100.0	73.52|84.47	74.08|85.11	77.18|99.28	100.0|100.0	89.32|100.0	89.32|100.0	90.97
EXPH5	98.6|98.6	98.5|98.3	98.9|100.0	98.55|100.0	100.0|100.0	100.0|100.0	98.45|100.0	100.0|100.0	98.2|100.0	100.0|100.0	99.41
AMER2	100.0|91.72	100.0|85.65	100.0|88.69	92.6|93.73	100.0|94.6	100.0|99.26	98.59|100.0	93.89|98.36	90.77|100.0	94.49|100.0	96.12
GSG1L	23.97|62.71	23.97|62.71	23.97|34.47	27.86|79.14	100.0|100.0	100.0|54.97	92.09|100.0	100.0|54.97	92.09|100.0	50.62|100.0	69.18
CENPL	98.05|100.0	98.05|100.0	93.87|97.68	93.59|97.11	100.0|100.0	100.0|100.0	100.0|100.0	100.0|100.0	100.0|100.0	100.0|100.0	98.92
ZBTB11	100.0|100.0	100.0|100.0	100.0|100.0	100.0|88.65	100.0|100.0	100.0|100.0	100.0|88.56	100.0|100.0	100.0|88.65	100.0|88.56	97.72
CCDC88A	97.37|100.0	98.95|92.8	99.26|93.7	78.3|99.73	98.9|88.91	99.23|89.78	78.89|96.32	100.0|100.0	73.44|99.73	73.91|99.73	92.95
POLR3D	100.0|100.0	100.0|100.0	100.0|100.0	100.0|100.0	100.0|100.0	100.0|100.0	100.0|100.0	100.0|100.0	100.0|100.0	100.0|100.0	100
PDGFB	55.72|78.51	58.06|78.88	55.43|78.42	56.6|78.78	100.0|100.0	100.0|100.0	100.0|100.0	100.0|100.0	100.0|100.0	100.0|100.0	87.02
ZNF275	36.44|36.53	36.44|36.53	36.97|27.86	17.02|19.22	38.93|38.93	38.67|29.06	17.07|19.22	38.67|29.06	17.07|19.22	12.83|19.22	28.25
PHF7	100.0|100.0	100.0|100.0	79.63|99.35	100.0|100.0	100.0|100.0	79.69|99.67	100.0|100.0	79.63|99.35	100.0|100.0	100.0|80.21	95.88
BPIFA2	99.2|99.6	99.2|99.2	83.13|88.09	87.55|94.78	100.0|100.0	83.47|88.09	87.9|94.78	83.53|88.51	87.55|94.78	88.09|90.0	91.87
RNF216	100.0|100.0	100.0|100.0	100.0|100.0	74.65|99.14	100.0|100.0	100.0|100.0	74.57|99.14	100.0|100.0	74.57|99.14	76.04|99.14	94.82
HRH3	98.37|100.0	98.37|69.08	84.51|66.74	98.37|100.0	100.0|69.08	85.91|66.74	100.0|100.0	52.86|59.44	63.17|99.4	64.38|90.09	83.33
TMPRSS5	89.8|86.61	99.78|80.0	100.0|100.0	99.35|96.83	87.45|72.7	85.36|89.67	91.63|92.6	80.35|100.0	79.48|96.62	98.68|94.93	91.09
ADCY9	100.0|100.0	100.0|100.0	100.0|100.0	59.69|100.0	100.0|100.0	100.0|100.0	59.69|100.0	100.0|100.0	59.69|100.0	59.72|100.0	91.94
MSANTD2	100.0|100.0	100.0|100.0	100.0|100.0	71.54|81.85	100.0|100.0	100.0|100.0	71.54|81.85	100.0|100.0	71.54|81.85	71.1|81.85	90.66
FABP1	100.0|100.0	100.0|100.0	100.0|100.0	100.0|100.0	100.0|100.0	100.0|100.0	100.0|100.0	100.0|100.0	100.0|100.0	100.0|100.0	100
HHIP	99.85|97.29	99.85|97.29	99.85|97.29	60.7|92.83	100.0|100.0	100.0|100.0	61.86|97.09	100.0|100.0	61.86|97.09	61.86|97.09	91.09
OTULINL	90.33|100.0	90.33|100.0	92.82|95.18	90.33|100.0	100.0|100.0	100.0|92.63	100.0|100.0	100.0|92.63	100.0|100.0	92.63|100.0	96.84
KIF3A	100.0|100.0	100.0|100.0	100.0|100.0	23.28|89.89	100.0|100.0	100.0|100.0	24.07|89.89	100.0|100.0	23.28|89.89	22.76|87.77	82.54
STN1	100.0|100.0	100.0|93.82	100.0|98.41	100.0|77.5	100.0|94.3	100.0|98.15	100.0|77.29	95.72|100.0	100.0|88.75	99.74|78.54	95.11
TBXT	84.37|92.91	100.0|100.0	100.0|100.0	97.24|99.76	93.16|84.4	93.42|84.63	93.16|86.79	100.0|100.0	97.02|99.76	97.48|100.0	95.21
TMEM72	100.0|77.9	100.0|100.0	100.0|100.0	100.0|100.0	77.9|100.0	77.9|100.0	77.9|100.0	100.0|100.0	100.0|100.0	100.0|100.0	95.58
PARL	99.21|99.47	100.0|100.0	100.0|100.0	100.0|93.14	99.47|99.21	99.47|99.73	100.0|93.14	100.0|100.0	100.0|93.14	90.98|84.07	97.55
XRRA1	100.0|100.0	90.86|89.85	100.0|100.0	100.0|100.0	91.14|92.95	100.0|100.0	100.0|100.0	89.85|92.37	89.85|91.55	100.0|100.0	96.42
CNGB3	89.51|100.0	100.0|100.0	89.26|100.0	72.12|100.0	100.0|89.51	84.41|85.01	80.69|100.0	89.26|100.0	72.12|100.0	81.41|100.0	91.67
PMPCB	98.25|100.0	98.05|100.0	98.44|100.0	98.05|100.0	100.0|100.0	100.0|100.0	100.0|100.0	100.0|100.0	100.0|100.0	100.0|100.0	99.64
ROR1	76.76|99.74	89.71|91.16	89.71|96.8	74.09|100.0	99.74|77.99	99.74|82.82	96.27|100.0	91.66|97.33	75.28|100.0	79.94|100.0	90.94
CARMIL1	94.7|100.0	94.21|100.0	100.0|100.0	8.51|100.0	99.56|100.0	100.0|98.25	9.04|100.0	100.0|97.82	9.08|100.0	8.88|100.0	81
NMI	100.0|98.1	100.0|97.17	93.18|91.4	100.0|98.09	100.0|99.06	98.41|98.73	100.0|100.0	99.06|100.0	99.06|100.0	98.73|98.73	98.49
SDCBP2	66.2|83.28	66.2|75.63	67.59|83.56	67.59|83.56	100.0|90.82	100.0|99.32	100.0|100.0	92.09|99.66	92.41|100.0	99.32|99.32	88.33
OXGR1	100.0|100.0	100.0|100.0	100.0|100.0	100.0|100.0	100.0|100.0	100.0|100.0	100.0|100.0	100.0|100.0	100.0|100.0	100.0|100.0	100
RGS11	69.0|69.59	71.13|70.38	68.15|68.88	43.52|91.52	100.0|100.0	95.72|95.92	37.47|78.12	99.79|100.0	42.44|90.18	37.55|78.12	75.37
BCL7B	37.11|65.83	45.89|80.2	45.89|80.2	45.89|80.2	85.93|84.65	85.93|84.65	85.93|84.65	100.0|100.0	100.0|100.0	100.0|100.0	79.65
PLA2G15	100.0|100.0	100.0|100.0	97.3|96.36	100.0|100.0	100.0|100.0	97.3|96.36	100.0|100.0	100.0|100.0	100.0|100.0	100.0|100.0	99.37
SAMD8	80.88|100.0	86.46|100.0	80.88|100.0	70.22|100.0	100.0|100.0	100.0|100.0	86.82|100.0	100.0|100.0	81.21|100.0	86.82|100.0	93.66
ARHGEF9	96.82|91.99	97.0|99.04	100.0|99.11	61.99|92.98	91.99|98.85	98.58|98.93	58.72|92.7	100.0|100.0	64.24|94.38	66.61|100.0	90.2
FAF2	100.0|100.0	96.4|82.82	100.0|100.0	93.71|100.0	96.4|82.82	100.0|100.0	93.71|100.0	82.82|96.4	80.5|100.0	93.71|100.0	94.96
PTPRN	94.2|96.22	94.3|96.22	94.4|96.23	94.2|96.22	100.0|100.0	97.65|97.45	100.0|100.0	97.65|97.55	100.0|100.0	97.45|97.65	97.37
VRK3	100.0|100.0	100.0|100.0	100.0|100.0	100.0|100.0	100.0|100.0	100.0|100.0	100.0|100.0	100.0|100.0	100.0|100.0	100.0|100.0	100
RECQL5	100.0|100.0	100.0|100.0	99.7|100.0	100.0|100.0	100.0|100.0	100.0|100.0	100.0|100.0	100.0|100.0	100.0|100.0	100.0|100.0	99.99
ASB4	99.53|99.77	99.53|99.77	99.53|99.77	60.66|100.0	100.0|100.0	100.0|100.0	60.8|100.0	100.0|100.0	60.8|100.0	60.8|100.0	92.05
PRCC	63.8|87.64	100.0|100.0	100.0|100.0	63.8|74.82	87.64|63.54	94.94|68.84	87.64|74.82	63.54|63.54	63.54|74.82	63.54|74.82	78.56
PTPN18	NA	84.7|50.22	80.6|47.68	84.7|54.44	100.0|41.37	100.0|41.28	42.78|19.18	100.0|100.0	75.88|82.25	76.38|82.97	70.25
FAM210A	87.55|87.55	58.24|95.21	87.55|87.55	87.55|87.55	58.24|95.21	87.55|87.55	87.55|87.55	95.21|58.24	95.21|58.24	87.55|87.55	83.22
AMPH	96.88|100.0	96.77|98.36	97.81|100.0	71.36|91.42	100.0|97.42	100.0|97.8	91.42|91.42	100.0|100.0	72.54|91.42	78.66|95.41	93.43
PHC3	88.8|100.0	89.87|100.0	88.89|100.0	74.76|99.76	100.0|98.81	100.0|100.0	85.55|99.76	98.91|100.0	83.18|99.76	83.69|97.39	94.46
LRRC52	100.0|100.0	100.0|100.0	100.0|100.0	100.0|100.0	100.0|100.0	100.0|100.0	100.0|100.0	97.46|97.77	100.0|100.0	92.99|92.7	99.05
SIDT2	97.35|92.67	100.0|92.85	100.0|92.85	100.0|92.88	100.0|100.0	100.0|100.0	100.0|100.0	100.0|100.0	100.0|100.0	100.0|100.0	98.43
FFAR3	66.83|78.72	78.96|97.55	78.47|99.37	80.2|100.0	83.97|88.07	78.72|84.64	78.72|83.33	97.86|100.0	97.55|98.46	100.0|100.0	88.57
CASQ2	84.48|92.67	67.15|90.73	67.69|89.71	67.69|90.58	73.86|90.98	74.46|89.95	74.26|90.58	91.71|89.95	91.46|90.58	89.71|90.58	84.44
HBS1L	88.34|99.56	88.34|99.56	88.6|100.0	67.1|99.62	100.0|100.0	100.0|100.0	75.77|99.81	100.0|100.0	75.77|99.81	76.25|100.0	92.93
NCF4	100.0|100.0	100.0|100.0	100.0|100.0	97.05|91.14	100.0|100.0	100.0|100.0	97.05|91.14	100.0|100.0	97.05|91.14	97.64|91.69	97.7
TH	99.8|99.8	100.0|100.0	100.0|99.8	100.0|100.0	100.0|100.0	100.0|99.8	99.8|100.0	100.0|100.0	99.8|100.0	99.8|100.0	99.93
TECPR2	86.89|95.86	100.0|100.0	100.0|100.0	100.0|100.0	95.86|86.89	96.72|86.93	95.93|87.33	100.0|100.0	100.0|100.0	100.0|100.0	96.62
RNF112	67.6|100.0	70.17|100.0	75.87|100.0	35.64|94.38	100.0|100.0	100.0|92.93	55.87|100.0	100.0|100.0	60.57|100.0	53.46|100.0	85.32
TMEM204	100.0|100.0	64.89|44.38	100.0|100.0	100.0|100.0	64.6|44.38	100.0|100.0	100.0|100.0	44.38|64.6	44.38|64.6	100.0|100.0	81.81
NOD2	83.51|83.51	83.32|83.32	83.22|81.45	83.51|83.51	83.32|83.32	83.22|81.45	83.61|83.61	83.22|81.45	83.32|83.32	81.45|83.22	82.99
SLC30A5	87.99|100.0	100.0|91.44	100.0|100.0	100.0|100.0	100.0|80.14	100.0|88.57	100.0|88.1	91.44|100.0	91.44|100.0	100.0|100.0	95.96
C13H20orf194	100.0|100.0	100.0|100.0	100.0|100.0	88.79|99.9	100.0|100.0	100.0|100.0	88.79|99.9	100.0|100.0	88.79|99.9	88.8|100.0	97.74
PAX4	100.0|99.43	92.73|90.88	100.0|99.43	82.27|91.88	93.16|93.16	100.0|100.0	80.63|91.88	96.58|97.13	80.63|91.88	81.09|91.88	92.73
UBE2O	88.22|100.0	95.89|96.11	95.97|96.12	88.22|100.0	100.0|88.42	100.0|88.43	100.0|100.0	96.19|96.12	88.42|100.0	88.43|100.0	95.33
VGLL2	96.85|95.64	90.54|100.0	98.74|97.2	57.41|81.25	90.03|100.0	98.44|98.14	56.7|81.25	100.0|88.82	66.92|79.46	56.83|81.7	85.8
CCDC153	24.71|37.95	15.7|26.73	48.26|79.43	47.38|77.99	90.18|100.0	93.3|100.0	93.3|100.0	27.72|26.79	100.0|100.0	100.0|100.0	69.47
TMEM220	83.97|78.44	83.97|78.44	80.77|65.97	80.77|79.75	100.0|100.0	100.0|100.0	75.45|79.75	100.0|100.0	75.45|79.75	71.73|86.71	85.05
MICAL2	57.03|98.84	96.3|99.26	57.08|100.0	52.57|98.27	100.0|62.17	100.0|100.0	92.26|99.52	61.11|100.0	57.57|100.0	94.19|99.62	86.29
CD40LG	100.0|100.0	100.0|100.0	100.0|100.0	100.0|100.0	100.0|100.0	100.0|100.0	100.0|100.0	100.0|100.0	100.0|100.0	100.0|100.0	100
MPPE1	100.0|100.0	100.0|100.0	100.0|98.74	100.0|100.0	100.0|100.0	90.84|89.92	100.0|100.0	99.31|100.0	100.0|100.0	100.0|100.0	98.94
WDR59	100.0|100.0	100.0|100.0	100.0|100.0	72.4|99.86	100.0|100.0	100.0|100.0	73.51|99.86	100.0|100.0	72.1|99.86	72.1|99.86	94.48
LOC117799447	90.4|100.0	48.02|85.86	90.4|100.0	90.4|100.0	53.12|85.86	100.0|100.0	100.0|100.0	85.86|53.12	85.86|53.12	100.0|100.0	86.1
ST6GALNAC6	66.53|98.5	57.4|74.47	65.72|96.72	48.07|67.14	86.49|75.79	97.3|96.72	68.77|64.87	73.42|83.28	79.74|85.84	70.75|67.14	76.23
TRMT6	87.32|93.33	100.0|100.0	100.0|100.0	100.0|92.38	93.33|87.32	93.33|87.32	93.33|80.67	100.0|100.0	100.0|92.38	100.0|92.57	94.66
RPS6KL1	88.96|100.0	72.78|84.02	85.54|100.0	85.54|100.0	81.96|84.02	96.32|100.0	96.32|100.0	84.02|86.03	84.02|95.32	100.0|100.0	91.24
APBB3	100.0|100.0	95.98|76.85	99.8|100.0	100.0|100.0	81.89|63.99	100.0|100.0	100.0|100.0	76.21|97.53	63.99|81.56	100.0|99.8	91.88
GDPD2	85.37|97.4	85.37|97.4	79.02|90.17	85.37|97.4	100.0|100.0	100.0|100.0	100.0|100.0	100.0|100.0	100.0|100.0	100.0|100.0	95.88
CABYR	66.08|91.68	71.93|100.0	64.47|97.35	68.57|87.5	59.03|60.25	99.8|100.0	100.0|92.35	60.25|64.24	60.25|54.29	100.0|90.3	79.42
RCSD1	52.49|51.79	86.65|96.47	48.87|52.43	31.9|43.12	89.06|100.0	67.86|73.79	72.54|99.39	65.24|62.86	44.08|53.52	49.03|61.77	65.14
SLC25A48	70.81|84.24	68.65|77.91	67.3|81.37	70.27|72.02	100.0|100.0	99.68|100.0	92.28|79.5	99.69|100.0	86.81|78.39	93.46|79.22	85.08
IMPACT	73.16|96.86	73.16|96.86	70.55|93.4	71.02|82.14	100.0|100.0	100.0|100.0	97.48|85.16	100.0|100.0	97.48|85.16	97.17|84.89	90.22
RMDN3	89.96|97.03	89.96|97.03	89.96|97.23	89.96|97.03	100.0|100.0	99.58|99.79	100.0|100.0	99.58|99.79	100.0|100.0	99.79|99.58	97.31
TADA1	100.0|100.0	100.0|100.0	100.0|100.0	100.0|82.11	100.0|100.0	100.0|100.0	100.0|82.11	100.0|100.0	100.0|84.8	100.0|82.11	96.56
NELFCD	100.0|98.09	100.0|93.03	100.0|95.06	95.01|100.0	98.26|93.7	100.0|95.55	93.22|100.0	100.0|100.0	88.39|100.0	90.44|100.0	97.04
TCF19	56.29|93.88	56.29|93.33	38.99|84.79	42.48|94.19	100.0|100.0	75.22|98.1	77.55|100.0	75.07|98.48	77.1|100.0	98.1|100.0	82.99
VCAN	100.0|100.0	100.0|100.0	100.0|100.0	98.77|100.0	100.0|100.0	100.0|100.0	98.82|100.0	100.0|100.0	98.68|100.0	99.94|100.0	99.81
SOGA1	93.94|100.0	93.94|100.0	99.35|93.11	95.35|97.56	100.0|100.0	100.0|87.79	100.0|96.04	99.79|87.85	100.0|96.11	89.18|97.36	96.37
BPIFA3	100.0|100.0	100.0|100.0	98.74|98.33	100.0|100.0	100.0|100.0	99.16|98.33	100.0|100.0	97.06|96.65	100.0|100.0	98.33|98.74	99.27
BNIPL	100.0|100.0	100.0|100.0	100.0|100.0	80.11|99.65	100.0|100.0	100.0|100.0	80.34|99.65	100.0|100.0	74.87|99.65	80.34|99.65	95.71
SLC35C2	92.93|93.44	92.93|95.26	92.93|93.96	92.93|86.8	100.0|100.0	93.44|93.96	100.0|92.89	95.26|93.96	100.0|92.89	93.96|86.8	94.22
WDR77	67.79|94.15	67.79|94.15	67.79|94.15	67.79|94.15	100.0|100.0	100.0|100.0	100.0|100.0	100.0|100.0	100.0|100.0	100.0|100.0	92.39
PEX11G	61.66|93.88	72.65|99.63	61.93|95.85	61.93|97.47	100.0|91.91	97.14|98.76	97.55|100.0	92.28|100.0	92.28|100.0	96.27|97.89	90.45
CD81	92.27|74.91	93.13|98.64	91.85|90.68	92.27|81.13	74.56|97.27	74.56|90.68	91.64|99.25	97.27|90.68	97.27|80.75	90.68|80.75	89.01
YIPF7	92.39|100.0	92.39|100.0	92.39|100.0	92.39|100.0	100.0|100.0	100.0|100.0	100.0|100.0	100.0|100.0	100.0|100.0	100.0|100.0	98.48
RNF222	100.0|91.52	56.72|65.52	100.0|100.0	56.22|100.0	50.89|65.52	93.75|99.53	50.45|100.0	68.97|56.87	64.94|100.0	55.45|100.0	78.82
LOC100465057	100.0|92.2	100.0|92.2	100.0|92.52	100.0|92.2	100.0|100.0	100.0|100.0	100.0|100.0	100.0|100.0	100.0|100.0	100.0|100.0	98.46
TPST2	100.0|100.0	100.0|86.65	99.47|96.15	100.0|100.0	100.0|86.65	99.47|96.15	100.0|100.0	86.2|97.69	86.65|100.0	96.15|99.47	96.54
PACS2	92.57|100.0	96.96|95.67	96.17|95.53	56.31|88.65	100.0|92.56	100.0|92.28	57.18|83.33	100.0|100.0	55.33|88.3	55.82|88.48	86.76
DYNC2I2	91.45|99.39	100.0|100.0	100.0|100.0	100.0|100.0	98.99|91.42	99.19|91.43	98.99|91.42	100.0|100.0	100.0|100.0	100.0|100.0	98.11
RSAD2	100.0|100.0	100.0|100.0	100.0|100.0	100.0|100.0	100.0|100.0	100.0|100.0	100.0|100.0	100.0|100.0	100.0|100.0	100.0|100.0	100
RNF130	100.0|75.36	89.23|75.82	87.69|54.42	70.77|100.0	70.72|79.74	87.25|71.84	53.33|100.0	88.24|64.44	50.98|84.78	36.28|82.61	76.18
APPBP2	100.0|100.0	100.0|100.0	100.0|100.0	100.0|100.0	100.0|100.0	100.0|100.0	100.0|100.0	100.0|100.0	100.0|100.0	100.0|100.0	100
DLGAP5	100.0|99.76	100.0|100.0	98.94|100.0	100.0|100.0	100.0|100.0	99.06|100.0	100.0|100.0	100.0|100.0	100.0|100.0	100.0|99.3	99.85
SHISA4	22.36|18.27	22.36|18.27	19.25|15.74	26.71|21.83	77.16|77.16	77.16|77.16	77.16|77.16	77.16|77.16	77.16|77.16	77.16|77.16	54.54
UTP11	100.0|100.0	100.0|100.0	100.0|100.0	100.0|100.0	100.0|100.0	100.0|100.0	100.0|100.0	100.0|100.0	100.0|100.0	100.0|100.0	100
IZUMO2	49.14|61.62	71.12|77.46	59.48|71.5	71.12|75.69	94.59|82.16	91.35|87.56	90.27|76.61	100.0|100.0	100.0|100.0	100.0|100.0	82.98
RBM41	100.0|100.0	89.67|97.97	89.88|99.54	89.88|93.35	89.67|97.97	89.88|99.54	89.88|93.35	97.97|99.31	97.97|93.13	99.54|93.35	95.09
PPARGC1A	87.65|98.12	87.88|100.0	87.77|98.12	83.39|97.76	98.12|100.0	100.0|100.0	93.34|97.76	100.0|98.12	100.0|97.76	93.35|97.89	95.85
SH3KBP1	100.0|100.0	100.0|100.0	100.0|100.0	54.37|97.47	100.0|100.0	100.0|100.0	55.86|97.47	100.0|100.0	57.96|97.47	54.44|97.47	90.63
ABCA4	99.61|100.0	97.93|100.0	99.96|100.0	78.37|99.4	98.36|100.0	99.96|100.0	78.75|99.45	100.0|98.35	80.05|99.34	78.74|99.4	95.38
TMEM191C	71.66|68.11	72.31|73.27	71.99|73.18	24.1|44.31	100.0|100.0	99.69|100.0	57.89|100.0	100.0|100.0	55.45|100.0	55.3|100.0	78.36
PYROXD2	100.0|100.0	100.0|100.0	100.0|100.0	100.0|100.0	100.0|100.0	100.0|100.0	100.0|100.0	100.0|100.0	100.0|100.0	100.0|100.0	100
EMG1	84.58|87.7	84.58|87.7	84.58|87.7	84.58|87.7	100.0|100.0	100.0|100.0	100.0|100.0	100.0|100.0	100.0|100.0	100.0|100.0	94.46
UPF2	100.0|100.0	100.0|100.0	100.0|100.0	79.54|92.58	100.0|100.0	100.0|100.0	79.54|92.58	100.0|100.0	79.54|92.58	79.67|92.58	94.43
MBLAC1	99.2|99.6	100.0|100.0	100.0|96.54	100.0|86.14	100.0|99.2	98.39|93.85	99.6|81.52	97.6|93.85	98.8|81.52	93.85|80.53	95.01
DHX58	100.0|100.0	98.23|99.4	100.0|100.0	98.53|100.0	98.23|99.55	100.0|100.0	98.38|100.0	99.4|98.23	97.91|98.2	98.53|100.0	99.23
DENND2C	99.36|100.0	100.0|100.0	100.0|100.0	100.0|100.0	100.0|99.36	100.0|100.0	100.0|100.0	100.0|100.0	100.0|100.0	100.0|100.0	99.94
GRP	91.16|91.16	99.32|100.0	91.84|92.47	50.34|55.22	87.07|88.28	100.0|100.0	53.06|58.21	100.0|99.32	53.79|58.21	47.95|52.24	78.48
ASXL3	98.92|100.0	100.0|91.04	100.0|98.94	88.34|100.0	100.0|89.82	100.0|97.61	89.29|100.0	91.86|99.38	80.2|100.0	87.12|100.0	95.63
SLFNL1	100.0|100.0	100.0|100.0	100.0|88.78	100.0|93.88	88.58|93.32	92.89|89.27	93.65|94.13	99.2|90.49	100.0|100.0	95.12|99.49	95.94
ZNF76	100.0|100.0	100.0|100.0	99.57|100.0	100.0|100.0	100.0|100.0	100.0|100.0	100.0|100.0	100.0|100.0	100.0|100.0	100.0|100.0	99.98
GTDC1	76.7|94.07	81.18|94.38	76.7|96.18	22.58|82.35	100.0|100.0	100.0|100.0	33.63|100.0	100.0|100.0	37.08|100.0	34.38|100.0	81.46
LRIT2	99.82|100.0	99.82|99.82	99.64|99.82	99.82|99.82	100.0|100.0	100.0|99.45	100.0|100.0	99.27|99.45	100.0|100.0	99.45|99.27	99.77
SEMA6C	100.0|100.0	100.0|100.0	97.4|97.4	81.1|100.0	100.0|100.0	100.0|100.0	83.55|100.0	100.0|100.0	82.04|100.0	81.41|100.0	96.15
RPH3AL	100.0|100.0	100.0|100.0	99.67|99.67	48.68|63.09	100.0|100.0	100.0|99.67	48.84|63.09	99.67|99.67	48.68|63.09	48.68|63.09	82.28
URB1	100.0|100.0	100.0|100.0	100.0|100.0	10.54|97.56	100.0|99.87	100.0|99.82	10.62|97.56	99.96|99.78	10.78|99.59	10.45|96.75	81.66
TDRD5	100.0|100.0	100.0|100.0	99.81|100.0	100.0|100.0	100.0|100.0	99.9|100.0	100.0|100.0	100.0|100.0	100.0|100.0	99.62|100.0	99.97
CPS1	93.02|100.0	97.91|100.0	97.91|100.0	91.71|100.0	100.0|95.0	100.0|95.0	93.33|94.66	100.0|100.0	93.67|100.0	93.67|100.0	97.29
STOML3	85.71|94.85	90.68|76.84	85.71|96.17	85.71|94.85	95.19|72.89	98.28|99.65	100.0|100.0	72.89|96.52	72.89|95.19	99.65|98.28	90.6
TNFRSF18	84.16|100.0	73.29|100.0	69.25|71.02	41.3|43.61	93.95|100.0	96.37|76.11	60.48|49.18	96.14|71.34	60.09|45.9	79.62|81.97	74.69
DDX55	100.0|100.0	100.0|100.0	100.0|99.83	100.0|87.08	100.0|100.0	100.0|100.0	100.0|87.23	99.83|99.83	100.0|87.08	99.83|86.94	97.38
HSPA12B	92.15|100.0	100.0|100.0	92.69|100.0	76.73|100.0	100.0|100.0	100.0|100.0	83.26|100.0	100.0|100.0	85.68|100.0	82.77|100.0	95.66
CCDC65	100.0|100.0	100.0|100.0	100.0|100.0	100.0|100.0	100.0|100.0	100.0|100.0	100.0|100.0	100.0|100.0	100.0|100.0	100.0|100.0	100
NUBP2	75.85|97.45	75.85|98.52	75.85|97.09	75.28|77.03	97.81|98.89	99.64|99.27	97.08|77.33	100.0|100.0	98.15|77.33	97.45|77.91	89.69
TDRD12	98.71|99.85	98.86|99.92	100.0|100.0	62.5|99.76	100.0|100.0	100.0|100.0	63.14|99.64	100.0|100.0	63.17|99.76	69.98|100.0	92.76
SELENOS	99.47|100.0	99.47|100.0	99.47|98.95	86.77|61.65	100.0|100.0	100.0|98.95	87.23|61.65	100.0|98.95	87.23|61.65	86.32|61.65	89.47
CD83	100.0|100.0	82.97|69.6	82.1|95.92	100.0|100.0	89.95|65.57	100.0|100.0	100.0|100.0	69.6|96.94	65.57|93.23	100.0|100.0	90.57
KMT2A	93.07|100.0	93.09|100.0	100.0|96.52	100.0|97.7	100.0|100.0	100.0|89.89	100.0|90.95	100.0|89.89	100.0|90.95	97.68|99.03	96.94
ENPP7	79.7|99.08	70.66|75.1	74.54|90.58	74.35|93.94	91.06|77.84	92.66|90.58	93.35|94.87	75.88|86.77	75.29|89.51	92.38|96.04	85.71
WDR38	22.92|23.31	86.05|79.94	21.59|21.45	99.0|78.22	86.49|79.01	82.77|80.86	83.11|64.57	78.4|83.83	79.01|67.19	80.86|64.3	68.14
DNAJB4	100.0|100.0	100.0|100.0	100.0|100.0	100.0|100.0	100.0|100.0	100.0|100.0	100.0|100.0	100.0|100.0	100.0|100.0	100.0|100.0	100
SHC2	82.86|97.77	93.71|100.0	94.97|100.0	72.48|95.84	86.83|81.96	100.0|95.29	85.53|95.84	100.0|100.0	81.26|96.47	82.37|98.13	92.07
CCDC117	100.0|100.0	100.0|100.0	100.0|100.0	100.0|100.0	100.0|100.0	100.0|100.0	100.0|100.0	100.0|100.0	100.0|100.0	100.0|100.0	100
KIF19	100.0|100.0	100.0|100.0	100.0|100.0	53.0|94.47	100.0|100.0	99.9|100.0	52.95|94.47	100.0|100.0	53.0|94.47	53.16|94.47	89.49
BOD1	77.3|77.3	77.3|77.72	77.3|82.66	77.3|55.21	77.3|77.72	77.3|82.66	77.3|55.21	77.72|82.66	77.72|55.21	82.66|55.21	74.04
CXXC1	100.0|100.0	100.0|100.0	100.0|100.0	99.85|99.4	100.0|100.0	100.0|100.0	100.0|98.95	100.0|100.0	100.0|98.95	100.0|98.95	99.81
RIC3	97.1|100.0	100.0|100.0	97.36|100.0	100.0|100.0	100.0|97.1	100.0|100.0	100.0|96.83	97.36|100.0	100.0|100.0	100.0|97.36	99.16
ROR2	97.42|99.16	97.73|99.47	98.14|100.0	94.52|100.0	95.48|95.48	95.27|95.97	94.53|99.89	95.9|96.61	92.85|98.11	93.11|97.67	96.87
UBTD2	79.24|98.42	100.0|98.84	97.88|98.72	79.24|98.42	100.0|73.36	100.0|81.2	100.0|100.0	100.0|100.0	73.36|100.0	81.2|100.0	92.99
APOLD1	86.43|98.37	87.86|99.19	85.71|97.56	88.21|99.2	100.0|99.19	100.0|100.0	100.0|98.8	99.19|100.0	99.6|99.2	100.0|98.8	96.87
COMMD2	100.0|100.0	100.0|100.0	100.0|100.0	100.0|100.0	100.0|100.0	100.0|100.0	100.0|100.0	100.0|100.0	100.0|100.0	100.0|100.0	100
RPE65	100.0|100.0	100.0|100.0	100.0|100.0	99.62|99.81	100.0|100.0	100.0|100.0	99.44|100.0	100.0|100.0	99.62|99.81	99.62|99.81	99.89
NEFM	63.32|80.07	65.25|82.04	64.7|82.78	61.29|100.0	53.96|53.65	53.96|54.6	51.4|88.02	55.27|56.25	51.1|88.02	52.0|88.02	67.29
DIXDC1	100.0|100.0	95.88|97.54	98.58|97.61	97.59|97.31	98.53|97.11	100.0|97.19	97.51|94.19	100.0|100.0	100.0|100.0	100.0|100.0	98.45
MORC3	81.26|99.74	100.0|100.0	100.0|100.0	97.66|100.0	99.74|81.26	100.0|81.85	99.74|83.21	100.0|100.0	97.66|100.0	97.88|100.0	96
OLIG3	98.53|100.0	62.87|92.43	100.0|100.0	81.62|100.0	63.81|92.43	100.0|98.53	81.34|98.2	92.97|63.0	65.41|54.5	81.32|100.0	86.35
CD37	55.03|83.99	55.67|65.99	55.03|84.82	58.46|67.91	92.48|71.83	100.0|100.0	95.75|72.89	71.83|93.4	91.62|89.8	96.7|72.89	78.8
STAT2	100.0|100.0	100.0|100.0	89.34|81.69	100.0|100.0	100.0|100.0	88.21|81.04	100.0|100.0	85.25|78.87	100.0|100.0	79.52|85.35	93.46
MDH1B	87.91|96.44	87.91|91.54	81.95|90.8	84.3|91.21	100.0|100.0	99.41|100.0	100.0|100.0	93.8|99.8	96.24|100.0	99.6|97.27	94.91
RASGEF1A	89.9|83.15	94.85|95.04	91.88|93.17	90.69|85.45	83.52|90.48	89.93|98.59	83.33|84.89	92.46|93.57	90.28|84.89	93.37|86.75	89.81
TSHB	87.34|100.0	87.34|100.0	87.34|100.0	75.95|100.0	100.0|100.0	100.0|100.0	86.96|100.0	100.0|100.0	86.96|100.0	86.23|100.0	94.91
PLAGL1	100.0|100.0	100.0|100.0	100.0|100.0	100.0|100.0	100.0|100.0	100.0|100.0	100.0|100.0	100.0|100.0	100.0|100.0	100.0|100.0	100
FBXO7	84.32|99.32	100.0|100.0	100.0|100.0	100.0|99.81	99.32|84.48	99.55|84.51	99.55|84.19	100.0|100.0	100.0|99.81	100.0|100.0	96.74
BYSL	100.0|100.0	100.0|100.0	100.0|100.0	100.0|100.0	100.0|100.0	100.0|100.0	100.0|100.0	100.0|100.0	100.0|100.0	100.0|100.0	100
BCAT1	86.17|100.0	85.96|88.4	85.32|88.52	79.15|100.0	99.74|84.25	98.96|84.33	90.16|96.4	99.56|100.0	76.15|96.4	76.82|96.4	90.63
MARCHF6	100.0|100.0	100.0|99.23	100.0|99.34	100.0|99.89	100.0|99.56	100.0|99.67	100.0|100.0	100.0|100.0	99.34|100.0	100.0|100.0	99.85
KL	96.53|25.33	96.53|24.93	96.53|24.65	96.53|35.46	99.9|98.31	99.9|97.24	71.43|100.0	97.91|96.84	70.29|100.0	69.53|100.0	79.89
ADAMTS4	84.58|100.0	84.68|100.0	85.38|100.0	84.68|100.0	100.0|100.0	100.0|99.29	100.0|100.0	100.0|99.53	100.0|100.0	99.53|100.0	96.88
HNRNPUL1	68.61|65.54	68.73|70.01	68.73|69.85	68.96|71.58	65.65|70.01	65.65|69.85	65.86|71.58	70.01|69.85	70.36|71.7	5.36|5.47	62.67
CLP1	100.0|100.0	100.0|97.93	100.0|100.0	100.0|100.0	100.0|97.93	100.0|100.0	100.0|100.0	97.93|100.0	97.93|100.0	100.0|100.0	99.59
EMC4	100.0|100.0	100.0|100.0	100.0|100.0	100.0|100.0	100.0|100.0	100.0|100.0	100.0|100.0	100.0|100.0	100.0|100.0	100.0|100.0	100
KCNJ16	100.0|100.0	100.0|100.0	100.0|100.0	100.0|100.0	100.0|100.0	100.0|100.0	100.0|100.0	100.0|100.0	100.0|100.0	100.0|100.0	100
CCDC151	100.0|100.0	100.0|100.0	100.0|100.0	100.0|100.0	100.0|100.0	100.0|100.0	100.0|100.0	100.0|100.0	100.0|100.0	100.0|100.0	100
ENTPD6	94.21|100.0	75.21|100.0	94.21|100.0	94.21|100.0	79.39|100.0	100.0|100.0	100.0|100.0	100.0|79.34	100.0|79.82	100.0|100.0	94.82
RBKS	86.9|90.68	69.94|63.69	86.9|90.4	69.94|78.86	82.3|71.82	100.0|100.0	82.3|88.93	72.09|82.35	80.22|99.33	82.35|89.26	83.41
AREG	81.45|79.15	81.45|69.35	81.45|90.32	81.45|74.17	96.11|84.21	90.11|100.0	96.47|90.4	78.64|100.0	84.21|90.07	100.0|82.12	86.56
CLPB	100.0|100.0	99.16|99.86	99.16|100.0	64.66|100.0	100.0|100.0	100.0|100.0	65.02|100.0	99.86|100.0	65.11|100.0	65.21|100.0	92.9
ART1	98.47|100.0	99.39|99.39	98.47|98.77	96.93|100.0	100.0|98.47	100.0|98.46	98.75|100.0	98.47|98.77	96.93|100.0	97.23|100.0	98.93
TOPAZ1	99.81|92.71	99.81|88.11	99.94|94.74	56.16|88.8	100.0|96.28	100.0|100.0	60.64|100.0	96.34|100.0	57.75|100.0	59.35|98.99	89.47
ZC3H12C	98.43|97.23	98.43|97.12	98.43|97.12	77.22|94.38	100.0|100.0	100.0|100.0	76.16|94.24	100.0|100.0	75.86|93.96	76.19|94.38	93.46
ATP13A1	100.0|100.0	100.0|100.0	97.76|98.25	96.35|100.0	100.0|100.0	96.93|97.42	96.35|100.0	97.6|98.08	96.35|100.0	96.83|100.0	98.6
C12H12orf43	69.14|69.14	69.14|69.14	68.4|71.88	69.89|69.89	70.26|70.26	69.14|72.66	100.0|100.0	69.14|72.66	71.0|71.0	72.27|68.77	73.19
TAFA2	88.51|100.0	88.51|100.0	88.51|97.04	70.27|83.2	100.0|100.0	100.0|97.04	79.39|83.2	100.0|97.04	79.39|83.2	70.37|76.0	89.08
FERMT1	97.41|99.85	97.41|99.85	97.41|100.0	99.57|99.86	100.0|100.0	99.85|100.0	100.0|100.0	99.85|100.0	100.0|100.0	100.0|99.86	99.55
LYSMD2	92.54|92.54	92.54|57.67	92.54|57.67	92.54|100.0	92.54|57.67	92.54|57.67	92.54|100.0	100.0|100.0	57.67|100.0	57.67|100.0	84.32
BAHD1	95.47|100.0	96.08|99.24	95.59|100.0	96.08|95.73	100.0|98.48	100.0|100.0	100.0|95.0	98.61|100.0	99.12|95.61	100.0|94.88	97.99
PDLIM2	51.53|100.0	52.69|93.3	51.82|100.0	66.52|100.0	100.0|91.75	100.0|100.0	100.0|77.8	91.75|100.0	92.27|78.68	100.0|77.8	86.3
ANKRD50	100.0|100.0	100.0|100.0	97.41|100.0	100.0|100.0	100.0|100.0	97.41|100.0	100.0|100.0	97.41|100.0	100.0|100.0	100.0|97.41	99.48
PGRMC2	70.85|68.63	69.23|76.68	70.04|79.72	68.83|68.83	67.06|76.68	69.41|81.57	66.67|68.83	100.0|100.0	76.23|68.83	78.34|68.83	74.76
P3H1	96.08|96.6	96.08|96.47	95.53|94.39	63.33|98.11	100.0|100.0	98.37|96.66	63.67|98.11	99.59|97.99	63.59|98.11	62.83|98.53	90.7
RAB17	46.52|86.22	45.56|86.76	46.04|89.72	45.56|89.2	94.67|97.26	94.22|99.07	94.67|100.0	97.72|100.0	96.35|99.06	99.07|99.53	85.36
ATP6V0A2	100.0|100.0	100.0|100.0	99.77|99.53	100.0|92.83	100.0|100.0	99.77|99.53	100.0|92.83	99.77|99.53	100.0|92.83	99.53|92.61	98.43
FRS2	100.0|98.26	100.0|100.0	100.0|100.0	100.0|100.0	98.26|100.0	98.26|100.0	98.26|100.0	100.0|100.0	100.0|100.0	100.0|100.0	99.65
RASGRP1	86.94|100.0	100.0|100.0	100.0|100.0	86.28|94.92	100.0|82.69	99.7|82.64	93.32|89.26	99.75|100.0	83.56|96.66	83.77|96.66	93.81
RBBP5	87.7|97.0	96.2|98.88	96.2|98.88	96.75|97.45	98.2|91.26	98.2|91.26	98.2|89.44	100.0|100.0	100.0|98.54	100.0|98.54	96.64
OPALIN	100.0|100.0	100.0|100.0	100.0|100.0	98.59|94.59	100.0|100.0	100.0|100.0	99.3|95.27	100.0|100.0	99.3|95.27	99.3|95.95	98.88
RSPH9	80.08|72.83	90.84|75.25	80.08|72.83	60.96|42.38	100.0|100.0	100.0|100.0	82.61|63.16	100.0|100.0	84.16|70.64	82.61|63.16	81.08
SAPCD1	75.14|90.48	96.05|100.0	68.36|82.88	100.0|100.0	68.03|58.82	97.96|98.63	91.84|91.84	47.06|54.79	100.0|100.0	100.0|100.0	86.09
RIPK4	54.64|55.39	54.64|51.72	54.78|51.78	53.16|55.32	56.21|52.48	56.34|52.54	53.89|55.32	59.49|59.41	50.32|55.32	50.25|55.32	54.42
CLIP4	91.04|90.52	100.0|100.0	100.0|100.0	90.9|96.23	90.52|91.04	90.52|90.91	90.38|96.23	100.0|100.0	90.9|96.23	90.77|96.23	94.62
CLEC4G	100.0|95.27	97.02|100.0	97.02|99.66	97.02|100.0	91.48|100.0	92.43|99.66	92.43|100.0	100.0|99.66	100.0|100.0	99.66|100.0	98.07
MPHOSPH10	100.0|100.0	100.0|100.0	100.0|100.0	100.0|100.0	100.0|100.0	100.0|100.0	100.0|100.0	100.0|100.0	100.0|100.0	100.0|100.0	100
EXOC8	100.0|100.0	100.0|100.0	99.45|100.0	100.0|100.0	100.0|100.0	99.45|100.0	100.0|100.0	99.45|100.0	100.0|100.0	100.0|99.45	99.89
EBNA1BP2	99.34|99.34	100.0|100.0	99.67|99.35	100.0|100.0	99.34|99.34	100.0|100.0	99.34|99.34	99.67|99.35	100.0|100.0	99.35|99.67	99.66
CIAO1	100.0|100.0	100.0|100.0	100.0|100.0	100.0|81.69	100.0|100.0	100.0|100.0	100.0|81.69	100.0|100.0	100.0|81.69	100.0|81.69	96.34
MEAK7	84.94|89.04	88.28|89.41	84.94|89.23	84.31|88.38	100.0|99.58	100.0|100.0	99.34|99.34	100.0|100.0	99.79|100.0	100.0|99.78	94.82
EPS8L3	100.0|100.0	96.89|99.33	98.2|99.83	98.03|100.0	99.22|100.0	100.0|100.0	99.69|100.0	100.0|99.83	100.0|100.0	100.0|100.0	99.55
TMEM74B	84.98|100.0	84.64|84.93	79.18|100.0	79.18|100.0	100.0|85.27	94.38|100.0	94.38|100.0	79.45|100.0	79.45|100.0	100.0|100.0	92.29
MTHFR	80.37|92.05	80.37|86.62	80.24|86.47	80.77|86.55	100.0|94.1	99.85|93.96	100.0|94.13	99.86|99.86	100.0|100.0	100.0|99.86	92.75
CD2AP	90.66|100.0	97.7|99.84	97.7|100.0	97.7|100.0	100.0|92.64	100.0|92.94	100.0|92.63	100.0|100.0	100.0|100.0	100.0|100.0	98.09
SLC39A6	100.0|100.0	100.0|100.0	100.0|100.0	100.0|100.0	100.0|100.0	100.0|100.0	100.0|100.0	100.0|100.0	100.0|100.0	100.0|100.0	100
VAC14	100.0|100.0	100.0|100.0	100.0|100.0	100.0|100.0	100.0|100.0	100.0|100.0	100.0|100.0	100.0|100.0	100.0|100.0	100.0|100.0	100
OSGIN1	75.73|100.0	73.88|100.0	73.88|100.0	73.88|100.0	97.55|100.0	97.55|100.0	97.55|100.0	100.0|100.0	100.0|100.0	100.0|100.0	94.5
C3H5orf15	100.0|100.0	100.0|100.0	100.0|100.0	100.0|100.0	100.0|100.0	100.0|100.0	100.0|100.0	100.0|100.0	100.0|100.0	100.0|100.0	100
GM2A	100.0|100.0	100.0|100.0	95.92|97.41	82.14|96.99	100.0|100.0	95.92|97.41	84.69|100.0	97.41|97.41	85.49|99.4	85.49|99.4	95.75
PMEPA1	70.92|70.67	70.92|67.34	70.92|72.99	70.92|84.39	80.92|77.1	80.21|82.85	80.92|96.62	76.43|82.85	77.1|96.62	82.85|95.78	79.47
PTPN6	89.03|92.77	89.03|92.77	89.03|92.46	82.9|69.27	100.0|100.0	99.5|99.16	93.61|75.07	99.5|99.16	93.61|75.07	92.8|74.66	89.97
WDR86	27.22|73.44	18.47|50.33	24.91|53.95	20.29|60.07	49.84|50.33	67.21|53.95	54.75|60.07	50.0|39.74	50.33|54.68	43.68|59.71	48.15
CHRM5	100.0|100.0	100.0|100.0	100.0|100.0	100.0|100.0	100.0|100.0	100.0|100.0	100.0|100.0	100.0|100.0	100.0|100.0	100.0|100.0	100
CHID1	72.35|93.89	73.33|91.22	70.0|90.15	72.94|88.78	100.0|100.0	100.0|99.24	100.0|100.0	100.0|100.0	100.0|100.0	100.0|100.0	92.6
VASN	100.0|100.0	100.0|100.0	99.7|99.55	77.38|100.0	100.0|100.0	100.0|100.0	77.27|100.0	96.75|97.18	76.92|100.0	76.97|99.62	95.07
EIF2AK2	96.99|99.61	100.0|99.63	99.25|100.0	100.0|100.0	99.81|95.39	100.0|100.0	100.0|100.0	100.0|100.0	99.82|100.0	100.0|100.0	99.53
MSANTD1	97.74|93.5	99.25|76.01	98.11|93.53	100.0|100.0	93.5|74.86	99.64|99.28	93.5|97.74	75.14|93.53	76.01|99.25	93.53|98.11	92.61
RAB3GAP2	90.52|100.0	90.52|100.0	90.26|100.0	84.74|99.92	100.0|100.0	99.78|100.0	93.68|99.92	99.78|100.0	93.68|99.92	93.87|99.69	96.81
TEDC2	51.35|99.26	97.5|100.0	92.12|100.0	95.0|100.0	100.0|64.43	97.77|60.32	100.0|63.64	100.0|100.0	100.0|100.0	100.0|100.0	91.07
KCNS1	93.55|99.0	52.56|100.0	93.55|99.2	49.72|99.24	55.42|99.64	99.4|99.6	52.21|98.48	97.83|54.53	94.58|99.24	52.72|99.24	84.49
[truncated: 8,123 more rows]

## Sheet: Table S4
Table S4 Identity of orthologous genes among five species
Orthologous gene	Dog VS ferret (identity%)	Dog VS giant panda (identity%)	Dog VS mouse (identity%)	Dog VS red panda (identity%)	Ferret VS giant panda (identity%)	Ferret VS mouse (identity%)	Ferret VS red panda (identity%)	Giant panda VS mouse (identity%)	Giant panda VS red panda (identity%)	Mouse VS red panda (identity%)	Average (identity%)
E2F3	98.5	96.5	97.6	97.1	96.2	97.3	96.8	95.2	95.3	96.7	96.72
KCNJ9	92.9	99.6	91.7	99.5	100	97.3	100	95.1	100	96.7	97.28
UBE3B	96.4	96.8	90	96.6	97.7	92	98.4	92	98.8	91.9	95.06
FBXL22	93.3	93.7	88.1	93.3	93.3	87.7	95.5	88.2	89.5	88.7	91.13
LOXL2	95.7	96	87.3	96	95.8	86.2	96.3	86.5	97.8	87.2	92.48
COMTD1	92	93.9	85.9	96.1	96.6	85.9	97.2	88.2	98.9	88.2	92.29
RRP12	94	95.4	87.9	94.2	95.9	88	96.1	88.1	95.6	87.8	92.3
C6H10orf71	82.2	82.4	61.8	80.4	84.1	60.1	83.9	60.4	81.2	57.4	73.39
GUCY2D	89.8	90.4	84.3	90	92.4	85.2	93.1	85.2	92.5	83.9	88.68
ELF2	92.2	94.3	89.4	94.4	96.1	87.4	96.7	89.4	98.1	89.7	92.77
ECM1	78.2	86	64.1	83.2	87.9	68.4	87.3	67.3	90.1	69.7	78.22
ALAS1	95.5	96.9	91	92.9	98.3	92.2	95.5	92.8	96.6	91.2	94.29
TM9SF4	95.5	98.3	96.1	98.3	95.6	92.3	96.1	95.3	99.1	95.9	96.25
JADE3	93.3	90.9	80.2	91.3	92	81	92.6	78.3	89.6	78.6	86.78
GAS2L1	87.5	90.5	77.5	85.5	91.8	76.9	89.9	76.9	88	77.6	84.21
MRS2	83.2	83.2	74.4	77.7	93.7	81.7	90.2	81.3	90.2	78.2	83.38
ATXN1	93.5	89.3	80	89.6	92.9	78.9	94.5	81.4	89.3	80.8	87.02
FOXJ1	96.9	95.5	92.2	94.5	98.6	94.3	96.9	93.6	96	92.6	95.11
KCNK1	97.7	96.3	90.3	97.8	96	89.6	99.3	94	92.6	90.6	94.42
CDK15	92.5	92.2	85.6	87.6	94.1	85.6	89.6	86	88.7	80.4	88.23
SF3B4	100	100	100	100	100	100	100	100	100	100	100
C12H19orf54	89.1	69.1	81.6	88.7	67.2	71.1	87	61.8	73	80.1	76.87
MCTP1	85.7	94.7	81.1	92.6	89.7	90	89.4	82.8	97.5	81.6	88.51
MMP11	89	92.7	84.9	89.4	93.4	82.1	87.8	84	89.1	80.4	87.28
TBX6	86.5	91.5	83.3	84.6	92	77.1	95.9	80.5	90.6	75.5	85.75
LOC100473665	87.2	95.1	85.2	91.1	88.6	79.8	89.8	82.1	90.5	80.7	87.01
CARM1	88.5	88	91.6	98.6	95.2	85.5	94.9	88.7	99.8	94.8	92.56
GFRA1	97.6	97.4	93.6	97.2	98.7	92.9	97.5	93.2	97.5	92.6	95.82
ADAT1	84.5	89.5	75.2	85.9	88.6	76	89.9	74.5	89	75.1	82.82
CST6	86.1	89.3	61.7	91.4	88.8	60.9	93.4	63.8	92.8	64.2	79.24
PCYOX1	93.5	94.3	75.2	93.1	97.4	76.2	97.6	77	97.2	75.6	87.71
PRSS36	77.2	90.2	79.4	91.1	78.1	71.7	78.8	80	92.9	79.7	81.91
COG1	90.4	92.1	82.2	90.1	90.7	80.4	91	83.3	90.9	80	87.11
CDC123	98.8	98.2	92.9	98.2	98.8	92.9	98.8	92.6	98.2	92.6	96.2
KCNK6	85.6	86.6	82.4	85.6	95.1	78.6	95.5	79.8	95.1	77.6	86.19
LOC100474931	90	88.5	83.1	87.8	91.5	82.6	95.2	77.3	92.5	80.1	86.86
RHOU	98.8	94.6	91.1	95.5	98.3	93	96.8	91.6	94.9	89	94.36
PPCDC	95.5	96	88.7	93.8	87.2	84.8	96.1	88.2	85.6	86.3	90.22
SIX2	94.6	97.3	94.6	83.9	97.3	98.6	88.5	97.3	86.6	87.5	92.62
KCTD20	95.9	95.5	88.1	95	97.1	89.3	97.6	89.7	97.2	88.5	93.39
ACCS	90	90.8	81.1	89.6	92.6	81.7	93.2	81.3	91.4	80.3	87.2
ASAP2	89	97.6	87.5	93.4	97.6	82.3	86.2	93.8	96.6	86.1	91.01
ONECUT1	99.8	99.8	98.1	78.4	100	98.3	78.8	98.3	78.8	77.9	90.82
EGR1	93	94.3	90	92.8	97.2	87.5	96.3	87.8	97	89.1	92.5
SLC4A3	95.8	96.5	92.3	94.6	97.3	94.4	96.3	92.7	95.9	91.9	94.77
PRX	88.7	89.9	83.7	76.3	76	73.4	90.1	66	74.1	72.5	79.07
PGAP4	97	97.5	93.5	98	98.8	94	99	94.3	99.3	94.5	96.59
GNA15	96.2	97.3	86.4	97	96.8	84.8	96.8	85	96.5	83.7	92.05
OSCAR	86.9	85.9	72.5	75	85.3	73.2	73.1	70.3	77.4	64.1	76.37
ARHGAP8	81.6	79.1	79.9	83.2	85.8	79.4	91.9	71.5	82.3	77.5	81.22
DEF6	99.2	98.6	94.1	99.1	99.3	95.5	99.7	94.3	99.2	94.6	97.36
D2HGDH	90.4	93	83.7	87.3	90.6	74.9	88.2	82.7	85.6	73.5	84.99
NBR1	90.2	88.4	80	89.7	90.3	78.4	93.3	78.6	91.8	78.1	85.88
MED18	100	100	98.6	100	100	98.6	100	98.6	100	98.6	99.44
LRRC46	85.4	89.4	65.1	86	88.5	66.6	86	64.7	88.2	64.7	78.46
RCN1	98	98.4	90.1	99.2	97.3	89.4	98.4	92.7	98.4	94.7	95.66
SYTL5	90.4	91.3	84	87.5	92.7	82.5	91.2	81.7	91.6	78	87.09
AP5S1	95	94.5	83.9	94.8	96.5	84.5	96.8	85.8	96.8	85	91.36
HELT	85.1	85.1	79.3	84.3	98.3	90.1	97.5	90.1	97.5	89.3	89.66
TULP4	97.1	97.6	90.3	93.7	97.4	90.3	94.7	90.1	94.2	89.7	93.51
RETREG1	96.3	93.2	88.3	95.5	94.3	89.2	97.1	77.6	93.3	88.5	91.33
SOCS2	95.4	95.9	91.4	91.6	97.5	96	99	97.3	96.5	94.7	95.53
TMEM115	98.3	99.4	93.7	99.4	98.3	92.2	98.9	93.4	99.4	93.4	96.64
SP5	97.7	96.6	95.7	68.8	98.2	96.2	69.6	95.6	68.8	66	85.32
GDNF	92.4	91.9	86.7	93.8	96.2	87.7	94.8	88.2	95.3	88.3	91.53
PLXDC2	97.4	97.4	90.2	97.7	98.9	90.6	98.1	90.8	98.1	95	95.42
CAV3	99.3	99.3	94	98.7	100	94.7	99.3	94.7	99.3	94	97.33
RHCG	91.3	93	76.6	91.5	92.3	75.7	92.9	75.3	96.7	74.5	85.98
NR6A1	98.8	97.7	95	99.2	97.4	98.4	99.5	93.7	97.2	98.4	97.53
VMAC	95.3	94.7	82.2	94.1	93.5	81.6	92.9	83.3	92.3	79.3	88.92
RCE1	99.3	100	95.6	69	100	96	99.4	97.5	100	96	95.28
FTSJ1	97.3	98.5	87.2	96.7	98.2	86.5	97.6	86.9	97.6	86.5	93.3
FBXL8	83.4	89.8	77.2	86.6	86.9	71.3	91.7	73.7	89	74.5	82.41
WDFY2	94.8	98	96.3	97.9	96.3	94.5	96.5	97.5	99.6	97.5	96.89
TBC1D17	97.5	97.6	90.6	98.3	96.6	90.2	98.6	91.8	98.6	92.6	95.24
RNF128	92.1	98.4	95.1	98.4	92.7	91.2	92.7	95.8	99.1	95.8	95.13
DMAP1	99.4	98.9	98.1	99.8	98.9	97.4	99.6	97.2	99.1	97.9	98.63
CDKN1B	95.5	96	88.3	96.3	95	88.3	96.3	88.4	96.9	87.6	92.86
PIH1D1	87.3	87.1	85.6	87	95.5	83.4	96.9	84.8	95.5	83.1	88.62
PRSS47	73.9	72.9	63.2	72.9	73.3	61	79.1	65.8	73.7	54.3	69.01
PEX5	99.1	99.4	93.6	99.7	98.6	93.1	98.8	93.3	99.1	93.6	96.83
PIGZ	86.5	86	74	86.3	91.2	76.6	92.7	75	91.1	75.9	83.53
KMT2C	86.4	89	79.6	89.1	87.3	78.7	90.2	78.8	91.2	80	85.03
GLDN	94.2	91.2	85.8	93	92.6	85.1	95.2	86.9	95.1	83.9	90.3
PROP1	86.5	85.4	70.4	82.9	81.2	76.6	80.8	66.4	80.7	65.4	77.63
MYLK3	75	74.1	58.7	66.1	78.6	66.4	77.2	61.7	77.1	59.4	69.43
CALCRL	95.6	96.8	89	95.9	96.5	88.6	98.1	88.1	97.4	87.9	93.39
TIMELESS	84.2	61.9	79.3	84.3	67.2	82	92.4	60.8	65.2	80.9	75.82
UTP3	74.6	77.7	75.6	75.8	81.5	74.3	80.9	73.3	91.4	77.7	78.28
VPS13A	92.4	95.6	82.3	96.7	94.4	79.8	96.2	82.2	97.9	85.3	90.28
MAN2C1	87.9	83.3	82.6	80.5	90.5	88.4	89.6	85	83.6	85.7	85.71
BAIAP3	61.3	60.6	57.4	61.1	92.7	88	93	86.7	93.5	84.7	77.9
LRP10	85.8	92.8	91	89.8	85.3	78.6	89.2	84.6	87.9	83.7	86.87
CLUH	95.3	95.9	93.9	94.4	98.4	92.9	98.4	93.1	97.5	92.5	95.23
ITGA10	94.3	95.8	87.8	94.4	96.3	86.6	96.1	87.7	95.9	87.3	92.22
NEU2	84.4	90.2	71	86.3	88.7	71.2	89.3	72.5	91.1	72.1	81.68
GALR2	93.5	93.5	89.1	84.1	98.2	85.4	88.2	86.3	87.6	78	88.39
CSRP1	97.9	97.9	97.9	98.5	99	99	99.5	99	99.5	99.5	98.77
UCN	94.4	91.3	83.5	89.2	93.7	83.5	91.5	79.5	90	78.5	87.51
MAK16	94.5	97.6	91.3	97.6	96	89.5	95.9	91.6	99.3	91.6	94.49
PDLIM5	87.5	93.7	81.1	90.5	88.8	77.8	91.8	83.2	91.8	79.3	86.55
PRELID3A	98.1	95.8	89.2	95.1	94.7	90.6	97.2	88.6	97.8	90.3	93.74
PRR35	64.6	62.7	63.4	65.1	78	62.2	84.6	61.9	86.7	59.6	68.88
UPK1B	96.2	94.8	92.7	93.7	94.4	92.7	96	91.2	94.6	89.7	93.6
NOTCH3	93.4	96.1	86	93.6	92.5	84.5	90.4	83.8	92.5	84.7	89.75
NAV1	96.8	95.2	87.3	93.8	98.7	93.1	94.9	88	94.2	88.3	93.03
LOC100478661	89.8	99.4	84.8	99.1	91.7	61.2	65.1	82.7	99.2	69.7	84.27
GALP	73.9	77.3	55.6	70.8	79.4	55	78.1	57	68.5	60.7	67.63
DAZL	99	98.6	93.2	98.3	98	92.9	97.6	92.2	97.6	91.6	95.9
FAM171A2	98.6	98.7	86.7	NA	98.9	93.8	100	97.7	98.8	91.7	96.1
GABRP	98	97.7	93.4	98.2	98.9	94.1	99.1	94.1	99.1	93.9	96.65
B4GALT3	96.3	96.8	94.7	98.7	98.5	93.7	96.7	93.9	97	95.2	96.15
C5H6orf201	69.9	84	67.4	82.5	87.8	63.9	90.7	66.1	84	66.1	76.24
KLHDC1	97.7	86.5	90.5	98.3	84.4	88.8	97.1	77.5	85.8	87.9	89.45
MATN3	90.8	89.4	84.1	93.8	90.8	85.4	96.5	84.6	94.5	92.9	90.28
ST6GAL1	92.7	94.9	77.2	93.2	96.5	80.3	94.5	79.8	96.5	78.8	88.44
PHACTR3	94.3	95.4	85.6	90.4	94.6	85.7	92	85.8	93.5	79.5	89.68
PTEN	NA	92.3	95.8	98.5	80.6	80.6	NA	96	100	98.2	92.75
RGL1	97.6	97.6	93.5	95.4	98.6	94.6	95.8	93.8	96.4	91.7	95.5
NYAP1	91.9	94.8	87.6	93.7	93.5	81.1	94.2	85.3	97.7	84.2	90.4
LRRC10	83.5	84.9	79.4	83.5	96.1	88.2	96.4	89.7	96.1	88.6	88.64
C8H1orf74	91.5	91	73.2	89.1	90.1	75.3	91.3	77.2	90.1	74.1	84.29
GCC1	95.1	91.4	88.8	94.6	90.7	87.7	97.5	83.9	91.1	87.5	90.83
KLRK1	84.4	73.7	57.5	95.5	89.8	55.9	94.8	64.7	94.2	74.8	78.53
KDM7A	97	97.1	89.5	98.1	95.9	88.7	97.4	88.6	96.7	89	93.8
CFAP69	89.3	95.6	83.4	94.6	90.3	77.8	90.8	83.5	95.6	82.8	88.37
TMEM41B	96.2	96.6	91.4	96.6	97.9	90.4	99	91.8	98.6	90.7	94.92
PDE11A	93	93.6	92	98.1	98	94.3	98.1	94.1	98.1	95.2	95.45
RBFOX1	98.9	96.9	93.4	100	96.2	93.3	100	95.5	99.4	98.1	97.17
TMEM252	87	84.8	65.9	73.8	71.3	62.8	81.9	67.5	83.6	57.4	73.6
CHTF18	80.1	84.9	69.8	77.7	84	69.7	84.4	69.2	84.8	69.3	77.39
GZF1	90.5	90.2	80.4	92.8	93.8	81	94.1	79.9	93.1	83.1	87.89
UNC80	95	94.5	93.1	100	95	93.8	99.6	93.1	99.5	98.7	96.23
FBXO40	90.9	90.4	83.1	91.3	95.6	84.3	96.2	83.6	95.6	84.1	89.51
ALKBH5	100	98.7	93.2	99.7	98.7	93.2	99.7	93.4	99	96.5	97.21
GJB2	98.2	99.6	92.5	95.1	98.7	92.5	95.6	92.9	95.6	89.8	95.05
B3GALT1	92.6	99.4	99.7	99.7	92.6	92.9	92.9	99.7	99.7	100	96.92
TRPA1	91.2	91.7	79.2	91.9	95.7	77.5	95.9	77.5	95.8	81.3	87.77
FOS	95	95.8	91.1	95.3	98.7	94	98.2	94.2	99.5	94.2	95.6
MS4A1	80.8	89.6	63.9	82.6	84.8	65.6	87.2	66.4	87.2	66.8	77.49
IL6R	77.2	83.1	47.6	77	82.5	47.8	82.8	46.9	81.2	46.6	67.27
ITIH3	83.3	94.6	84.4	94.2	85.1	76	85.5	84.5	94.4	84.1	86.61
HDHD3	87.6	88	79	88.1	89.6	77.3	90.4	77.3	88	74.5	83.98
FEZ1	98.2	96.9	92.5	95.7	97.4	93	96.6	91.6	96.9	91.2	95
SLC34A2	82.4	84.6	82.8	83.7	86.6	77	94.7	79.2	87.4	76.4	83.48
MINDY4	88.1	88.2	71.2	78.6	90.1	72.9	85.1	72.8	83	61.7	79.17
SH3D21	60.3	68	51.9	71.5	81.9	48.2	71.3	55.4	76.3	54.2	63.9
DOK5	99.6	99.4	95.8	98.2	100	96.1	98.2	98.5	98.6	96.1	98.05
BBS4	79	78.2	90.8	89.7	80.9	77.4	85.7	78	87.4	86.4	83.35
ILDR1	81.3	77.6	79.3	80.2	85.6	78.6	87.2	73.8	88.8	76.9	80.93
LRRC55	96.9	97.2	95.8	92.8	96.5	96.1	95	94.5	92.8	92	94.96
SUSD6	97	88.6	81.5	95	95.8	88.3	97.7	80.3	97	88.6	90.98
PCOLCE	95.2	88	80.2	91.3	89.2	78.8	92.7	72.6	86.1	78.1	85.22
KCNK13	94.2	94.6	82.2	94.6	95.4	83.4	93.2	83.9	95.2	81.6	89.83
TOMM70	99.6	99.4	94.4	100	99.1	94.3	99.6	94.1	99.4	94.4	97.43
LRRTM4	99.6	98.5	94.1	99.8	99.8	95.6	100	95.1	99.8	95.7	97.8
NRP2	98	98.2	94.6	97.6	97.1	94.3	96.8	94.4	97.7	94.6	96.33
GLIS2	94.3	97	92.6	98.9	95.2	90.6	97.1	90.5	97.3	92.4	94.59
SYNPO2	78.2	78.2	67.7	78	85.5	67.3	86.8	74.4	91.3	71.5	77.89
SLC16A3	91.8	89.9	89.1	91.8	88.3	86.4	90.4	86.2	92.8	88.9	89.56
SLC32A1	99.4	99.5	98.7	99.4	99.5	98.7	99.8	99.2	99.5	98.9	99.26
C5H6orf47	87.8	89.5	74.7	88.9	91.5	72.4	88.9	73.3	89.2	70.5	82.67
KCNV1	99.2	98.8	93.8	99	99.6	93.6	99.6	93.4	99.2	93.4	96.96
FLRT2	96.7	96.4	94.1	95.8	96.5	95.6	92.5	94.1	92.1	90.1	94.39
FIGN	71.7	72.1	71.1	72.1	97.9	96.3	97.4	97.1	96.2	94.6	86.65
CATSPERD	84.7	88.2	52.4	83.4	87.6	50.7	85.7	52	85.4	50.3	72.04
C3	78.4	80.7	74.9	82	82.1	72.2	89.4	73.8	89.7	77.7	80.09
ATXN7L1	93.9	91.3	86.4	93.7	94.6	89.8	91.2	87.9	86.8	85.2	90.08
HSPB6	89.2	92.6	90.2	88.4	91	83	95.3	86.3	90.1	82.9	88.9
AGXT2	91.8	89.8	76.1	88.3	93	78.6	93	76.6	91.6	76.8	85.56
CERS3	97	97.3	82.6	97	98.2	78.1	98.5	80.1	99.1	81.6	90.95
GTPBP3	87.5	92.5	78.9	86	88.5	74.4	92.3	78.6	86.4	73.2	83.83
OGFRL1	94	80.7	73.1	96.6	89	85.4	96.2	75.6	88.5	84.6	86.37
RIF1	85.3	86.3	66.3	84.4	88.8	67.3	89.7	67	88.8	68.1	79.2
ASCC3	98.4	98.1	90.1	99.8	98.7	90.3	99.8	90.2	99.7	95.4	96.05
TEAD2	96.9	96.9	89.6	95.8	100	87.5	98.9	87.6	98.9	87.4	93.95
C4H19orf67	96	91.7	78.6	92.6	96	90.1	96.7	77.8	95.5	78.8	89.38
PLCG1	98.8	99	96.2	99.3	98.7	96	99.2	96.1	99.2	96.4	97.89
STAT6	90.5	91.6	82.2	87.6	97.9	86.2	93.8	87	94.5	84	89.53
KDM4A	97.1	99	92.2	98.2	97.3	91.1	97.5	92.1	98.3	92.7	95.55
ARMC5	85.9	88.5	77.9	74	93.3	83.4	72	84.7	75.1	63.8	79.86
MAEL	91.3	89.5	87.2	85.1	93.4	90.6	94.5	87.9	92	89.4	90.09
CD70	87.6	88.7	57.8	86.1	89.2	60.9	89.1	59.4	87.2	58.9	76.49
TMPRSS6	84	97.1	84.4	96	84.7	73.1	83.9	85	97.2	85.6	87.1
FNBP4	95	92.5	81.7	94.3	90.4	79.5	92.2	78.1	89	81.8	87.45
MCM5	88.6	95.1	91.3	93.3	92.9	89.5	92.8	95	97.4	93.5	92.94
FCER1G	89.5	93	71.2	94.3	94.2	74.6	91.9	76.3	96.5	74.6	85.61
MRPS5	86.5	89.8	81	92	88.9	77.6	93.2	78.5	95.4	79.9	86.28
COPS2	98.4	100	100	100	98.4	98.4	98.4	100	100	100	99.36
SKA3	88.2	84	60	85.5	83	57.8	85.5	55.3	80	61.3	74.06
C8G	73.5	70.6	62.1	77.7	81.1	66.3	90.1	67.3	85.1	69.8	74.36
SCRG1	89.7	88.8	79.6	89.8	91.8	80.4	93.8	80.6	90.8	79.6	86.49
LZTS3	97.6	99	91.4	99	97.5	91.7	98.4	90.9	98.9	90.8	95.52
SOWAHA	66.8	80	62.8	71.5	76.8	69.5	80.9	68.7	76.5	67.2	72.07
FAM3B	85.6	86.9	75.2	84.1	91.2	77	91.2	72.8	91.7	76.1	83.18
HOXC9	93.5	93.5	93.5	93.5	100	100	98.8	100	98.8	98.8	97.04
GPBP1L1	97.7	98.9	87.8	94.7	98.7	88.3	94.1	88.5	95	84.3	92.8
APMAP	89.7	90.8	81.2	89.9	96.4	86	97.1	87.5	97.1	87.5	90.32
NUDCD3	95	95	81.5	90.6	98	87.3	90.1	80.7	89.6	80.7	88.85
PTGES2	92.2	90.6	81.3	91.9	96.2	85.3	97.6	84.5	95.2	85.6	90.04
LARP1	98.3	97.1	90.4	99.6	96.7	86.3	98.3	91.8	97	90.4	94.59
VPS37D	91.4	96.6	96	97.1	91.3	78.6	91.3	93.1	96.3	93.1	92.48
PSENEN	100	100	97	62.1	100	97	62.1	97	62.1	60.2	83.75
PCBD1	99	99	100	99	100	99	100	99	100	99	99.4
ACO2	99	99.1	97.3	98.9	99.4	97.6	99.5	97.7	99.1	97.2	98.48
EFHB	76.9	86.8	67	84.7	80.8	61	80.5	68.4	89.4	70.6	76.61
GUCA2A	75.7	73.9	62.9	73.9	77.5	59.5	80.2	57.8	81.1	59.5	70.2
CLEC5A	73.3	73.3	49.3	77.8	90.7	64.2	76.6	67.7	74.9	54.2	70.2
WDR41	94.6	95.7	77.7	95.9	96.3	79.6	96.1	80	98	80	89.39
TG	84.2	87	70.5	86.6	87.6	69.8	89.5	70.7	91.5	77	81.44
NRCAM	96.5	96.6	87.1	95.4	96.6	85.9	96.5	86.4	95.8	85.4	92.22
NSG2	100	98.8	97.1	95.2	98.8	97.1	95.2	97.1	93.3	94.3	96.69
DUSP5	96.2	96.6	91.7	95.7	94.9	88.8	96.5	91.4	93.8	87.3	93.29
MZF1	88.8	85	64.5	81.4	87.2	64.1	82.1	60.7	79	59.3	75.21
MIPEP	96.9	89.8	86.2	96	90.6	84.7	87.2	79.2	78.7	78.8	86.81
HSPA9	98.8	98.8	97.2	63.7	99.7	98.2	64	98.2	64.1	62.7	84.54
FAM217A	80	80.5	55.9	77.7	91.8	56.5	85.8	57.1	84.9	54.9	72.51
TMIGD1	85.1	87.4	71	87	88.9	69.8	89.3	69.5	88.5	69.1	80.56
HTR1A	94.5	95.2	85.8	94.9	97.9	89.8	97.9	88.6	97.9	88.4	93.09
RSPH14	87.1	82.4	68	87.2	91.5	73	92.2	72.8	88.7	74.5	81.74
BPIFB2	83.8	85.6	66.6	85.5	87.6	63.8	91.4	66.4	88.8	63.9	78.34
SH3RF3	90.7	92.4	75.3	90.5	96.1	79.9	94.8	81	95.4	78.8	87.49
TMCO5A	70.9	80.7	65.2	69.6	77.3	56.6	75.7	66.7	85.3	61.9	70.99
MYBPC3	92.8	90.3	85.7	89.5	93.9	88.4	90.2	86.9	89.3	85.9	89.29
CPT2	88.3	89.8	84.7	87.2	92	85.2	91.4	84.7	91.1	82.6	87.7
ABAT	98.2	88.7	91	97.7	89.3	90.8	98.1	82.6	88.1	90.6	91.51
CTNNBL1	100	99.8	98	97.3	99.8	98	97.3	98.2	97.3	95.7	98.14
HGSNAT	92.6	93.8	80.5	93	95	82.6	95	82.2	94.7	83.1	89.25
SARS1	93.7	94.6	93.1	97.9	98.6	90.7	93.5	90.5	94.4	92.2	93.92
SGTB	97.7	98.7	96.7	98	97	94.7	97	97	98.7	97	97.25
IGF2R	90.2	93	79	93.4	92.3	79.7	92.5	80.7	94.7	80.2	87.57
LSM14A	100	99.8	91.5	99.8	99.8	92.2	99.8	92.4	99.6	91.9	96.68
SPINK5	86.8	91.4	54.2	88.5	88.3	54.8	91	54.5	91.8	47.5	74.88
ANP32E	99.4	99.4	97.4	99.4	100	96.8	100	96.8	100	90.9	98.01
FNDC11	87.4	85.6	87.7	84.3	86.8	83.5	89	83.5	83.6	82.6	85.4
SLBP	95.7	88.6	86.2	92.4	97.3	92.4	92.8	86.5	92.4	88.4	91.27
CCDC86	93.3	95.2	80.8	91.3	81.4	77.1	83.3	77.5	79.4	58.4	81.77
HMGCS1	98.5	97.9	94.3	98.7	97.9	94.8	98.7	95.2	98.5	95.2	96.97
SH3PXD2A	95.2	93.1	83.6	92.7	94	85.6	94.1	85.5	91.8	80.3	89.59
IL27	89	91.6	71.6	90.3	86.5	65.4	86	67.2	88.1	64.7	80.04
KCNJ8	98.3	95	96.7	96.5	95.9	97.6	96.9	94.8	93.4	95	96.01
FPGS	91	93.2	79.9	88.9	92.2	79.2	89.4	79.6	90.1	76.9	86.04
REC114	79	81.6	64.1	71.2	83.7	75.5	80.7	65.6	71.8	60.5	73.37
TRANK1	91.9	91.7	78.4	90.8	93.4	79.6	93.1	78	91.9	78.1	86.69
CA7	97.6	97.9	92.4	84.7	86.2	92	99.6	79.2	86.5	92.4	90.85
LOC100478285	97.4	98.7	91.1	98.7	96.4	89.6	96.2	89.5	100	88.6	94.62
PLXDC1	95.7	80.2	82.1	93.7	82.1	82.7	95.9	70.6	80.1	81.7	84.48
MARCHF4	86.3	94.9	84.7	93.3	85.5	78.1	95.4	82.9	94.6	81.6	87.73
CD72	66.3	80.8	53.5	66.5	67	49.2	71.7	53.1	69.3	48.2	62.56
FAM227A	70.4	71.6	50.3	91.4	80.3	53.4	91.4	52.4	91.4	77.4	73
SZRD1	92.1	93.8	98.7	97.1	86.2	90.7	98.6	92.5	90.6	95.7	93.6
PI16	82	85.7	60	76.1	89.6	72.4	95.5	59.2	81.2	51.5	75.32
CHRNA1	93.5	94.6	90.4	93.8	98.5	95.2	98.5	95.2	98.7	95.4	95.38
SPARCL1	81.6	80.1	58.5	81.4	81.6	64.8	77.5	59.2	81.4	58.1	72.42
CERS5	94.6	89.7	79.9	93.4	94.2	72.3	97.6	75	93.1	74.7	86.45
MAST4	89.2	88.4	80.5	90.3	89.9	76.8	91	75.2	89.5	75.8	84.66
ASH2L	95.6	94.7	94.5	95.6	98.8	98.6	98.6	97.2	97.7	97.9	96.92
POU3F4	98.3	98.9	96.4	98.6	98.9	96.4	98.6	97	99.5	96.8	97.94
WFIKKN2	94.6	94.8	91.5	93	95.3	91.4	96.5	92.1	94.1	91.1	93.44
GH1	98.1	79.6	90.3	94.9	78.2	89.8	94	72.2	75.9	88.6	86.16
GDPGP1	90.7	90.9	75.8	88.1	94	78.5	92.6	79.2	91.4	76.9	85.81
SLCO3A1	99.7	99.4	97.1	99.6	99.1	96.6	99.6	96.2	99.2	96.4	98.29
ATPSCKMT	84	85.3	79.9	88	83.6	77	91.1	74.6	85.8	77.8	82.71
PAQR4	97.8	98.2	95.6	96.3	98.2	96.3	97.2	96	96.8	94.5	96.69
TNFAIP2	87.6	63.2	73.6	86	90.8	75.2	89.2	74.9	89.3	72.4	80.22
LDLRAD3	91.9	92.4	89.4	89.2	97.3	91	95.4	90.7	93.3	89.7	92.03
CSTF1	57.7	100	99.8	100	57.7	57.4	57.7	99.8	100	99.8	82.99
CEP57	87.6	88.8	79.8	87.2	97.2	85.1	96	85.9	96.8	84.9	88.93
KLHL35	91.3	95.6	79.4	94.8	96.7	79.8	96.7	78.8	97.8	75.5	88.64
LIPT1	91.7	93.6	81.2	92	95.7	77.7	94.9	79.1	95.7	77.5	87.91
TFAP2D	100	99.8	99.6	99.8	99.8	99.6	99.8	99.3	99.6	99.3	99.66
TMEM248	97.7	98.1	94.5	98.1	97.8	93.6	98.4	93.9	98.1	93.9	96.41
SLC38A5	89	89.4	77.4	88.3	98.9	85.2	97.7	85	97.9	85.3	89.41
FAM122B	93.4	94.5	76	89	99.1	77.5	95.6	79.6	94.7	73.6	87.3
SFRP4	96.4	94.2	86.7	95	95.1	89.5	96	85.6	93.3	86.7	91.85
DECR1	85.8	87.8	85.6	92.3	93.6	81.5	95.4	82.1	95.1	85.6	88.48
GPR37L1	81	83.4	82.1	84.7	88.8	83	90.6	85.1	88.8	86.5	85.4
WDR13	99.2	93.1	99.2	99	93.4	99.2	99.4	93.1	93.2	99	96.78
CDK5RAP3	93.5	89.9	81.6	88	92.2	82.8	92.9	85.9	93.1	85.3	88.52
TBC1D8	93.9	95.7	89.1	94.2	94.5	91.5	94.3	89	95.1	87.8	92.51
INSM2	87.3	84.2	61.2	80.4	89.2	63.2	78.8	63.7	78.6	63	74.96
C1H3orf52	74.6	86	66.7	85.9	62.6	56.3	68.9	61.2	83.9	61.9	70.8
GREM1	100	99.5	92.4	98.4	99.5	92.4	99.5	91.8	98.9	92.9	96.53
SCARA5	90.8	90.3	86.7	88.2	97.3	90.9	96.4	90.9	96.9	90.6	91.9
LOC100473238	92.9	92.1	87.5	93.2	96.9	91.7	98.5	92.2	96.8	92	93.38
RNF41	100	99.6	99.6	100	99.7	99.7	100	99.4	99.7	99.7	99.74
RPAIN	78.3	74.1	67.6	80.5	85	67.9	84.1	61.7	84.1	62.8	74.61
PARP11	97.9	97.9	93.6	97.9	99.4	94.6	99.1	94.9	98.5	93.7	96.75
B4GALNT1	95.9	95.9	86.7	96.6	98.1	86.9	98.1	87.4	98.5	87.8	93.19
NSUN3	90.4	91	84.1	89.3	93.8	84.6	95.9	82.8	94.3	84.4	89.06
ZBTB49	76.5	85	66	77.5	82	60.7	85.3	67	85	65	75
FLRT1	94.1	97.8	95	95.7	95	92.4	93.1	95.8	95.5	93.2	94.76
HEATR4	82	87.6	64.9	83.6	86.8	61.7	87.7	64.2	86.7	63.6	76.88
TMEM65	73.4	100	61.5	84.9	93	81.4	87.7	71.9	98.2	72.8	82.48
KLK6	69.5	71.1	53.3	64	94.3	69.4	95.1	67.3	95.6	68.7	74.83
PCIF1	98.1	99.3	93.5	99	99.4	94.6	98	93.8	99.3	93.4	96.84
FAM160B2	92.2	92.4	83.2	92	94.2	82.8	94.5	83.9	94.9	83.4	89.35
CTDSP2	99.6	99.6	93.9	99.5	100	94.1	99.6	94.1	99.6	94	97.4
ZDHHC18	99.2	98.8	96.4	98.4	98.4	96	98	96	98.8	96.4	97.64
SYT17	99.5	99.8	94.1	99.4	99.2	94.9	99.4	94.7	99	92.6	97.26
DIS3	97.8	98	91.1	97.8	99.2	90.9	99.2	90.9	98.9	90.8	95.46
KIAA1614	73.6	75.7	50.8	73.6	80	51.8	79.2	55.6	77.3	46.4	66.4
RBM27	97.8	98.7	91.8	96.9	98.9	92.2	98	92.5	97.9	93.5	95.82
NEDD1	96.2	96.4	79.2	96.2	96.4	79.7	98.6	80	96.5	80.2	89.94
LGI1	99.6	99.8	97.1	99.6	99.5	96.8	99.3	96.9	98.9	96.8	98.43
OCLN	93.2	93.4	85.4	92.8	94.8	84.5	96	86.4	95.2	86.2	90.79
SLC35A1	96.1	95.8	90.8	96.4	98.5	91.7	98.5	90.8	98.1	91.1	94.78
SUZ12	96.3	99.9	97.6	99.7	96.4	94.5	96.6	97.8	99.9	97.6	97.63
KCNJ5	98.9	98.9	97.1	99.5	99	94	98.6	94	98.1	94	97.21
LOC100471780	91	92.8	77.6	92.1	91.8	77.4	92	78	93.1	77.6	86.34
CDX1	91.7	96.6	77.6	96.7	92.5	72.4	93.5	79.1	96.7	88	88.48
JHY	76.2	81	58.7	80.1	81.5	62	82.3	59.6	84.5	59.1	72.5
ARID5B	88.2	87.9	80.4	83.6	94.2	84.4	92.7	85	91.8	81.3	86.95
CAMTA1	93.6	98.4	89.1	99.2	95.4	88.4	97.5	88.9	99.3	90.9	94.07
FAM167A	84.8	92.9	76.9	76.7	87.1	75.9	77.6	80.6	78.6	69.4	80.05
ZMAT2	100	100	100	100	100	100	100	100	98.5	100	99.85
TBC1D13	88.7	97	96.5	97	89.9	89	89.9	97	98.5	97	94.05
TBC1D23	98.8	98.7	95.2	98.8	99	95	99.3	94.7	98.9	94.9	97.33
IBA57	82.2	89	74.8	83.8	93.2	70.7	89.8	78	86.2	75.6	82.33
MEI1	82.3	92.5	80.9	92.6	84.3	71.8	84.7	80.9	94.3	80.6	84.49
DCDC2C	81.2	84.2	70.8	85.7	86.2	69.4	84.7	67.1	85.7	69.2	78.42
F2	75.7	82.9	73	82.7	85.7	75.1	87.3	79.9	93.6	80.4	81.63
LURAP1L	93.5	93.1	87.9	96.5	96	90.1	96.5	88	95.6	94.7	93.19
TMEM170A	98.6	98.6	94.4	97.9	100	94.4	99.3	94.4	99.3	94.4	97.13
C2H1orf50	89.4	70.1	82.5	73	90	81.2	95.2	79.8	90.1	81.2	83.25
SLITRK2	97.9	98.2	97.6	97.2	98.5	96.5	96.6	97.2	96.7	96.1	97.25
ZBTB46	95.3	97.1	91.9	95.3	95.6	88.3	86.6	89.7	87.5	80.2	90.75
GRB14	99	98.5	86.8	100	98.9	86.3	98.6	89.2	98.9	88.5	94.47
GPR171	92.5	94.7	86.4	94.7	94	83.6	95	86.1	95.9	85.8	90.87
PLEKHA7	88.9	89.4	76.3	93	93.5	85.2	92.2	84.2	87.8	80.5	87.1
MFAP2	88.7	77.9	63.3	76.8	80.5	68.3	81.5	82.3	90.3	80	78.96
UBXN1	90.8	92.2	88.7	90.4	98.6	94.3	98	94.3	98.3	93.3	93.89
MFSD6	82.9	91	78.7	83.7	85.9	77.5	88.9	81.4	88.9	82	84.09
SPTY2D1	88	91.2	66.1	87.4	89.9	64	91	66.5	86.8	65.1	79.6
HTR7	97.9	93.7	93.1	98.3	95.1	94.5	98.8	90.1	98.4	94.9	95.48
SLC39A13	96.7	92.7	84.2	95.2	94.7	85.4	97	85.2	94.5	87	91.26
ZDHHC14	98.6	98.9	94.1	94.6	99.2	94.7	94.6	96.6	98.6	89.9	95.98
FAN1	86.9	85.5	69.4	86.7	86.4	68.2	91.4	66.1	87.1	68	79.57
AURKAIP1	84.4	87.9	71	72.4	86.4	68.5	76.9	72	72.9	60.5	75.29
GCN1	98.2	98.1	92.8	98.4	98.1	93	98.7	92.9	98.4	93	96.16
NAGPA	88.6	78.1	69.7	91.9	82.6	66.8	90.5	71.5	78.9	68.6	78.72
HOXC6	100	96.2	100	64.8	96.2	100	64.8	96.2	62.9	64.8	84.59
LEKR1	86.7	78.5	64.9	93.1	89	70.7	NA	57	79.6	80.5	77.7778
UVRAG	95	92.7	83.9	82.6	92.2	84.8	85.5	80.6	80.2	74	85.15
ZDHHC7	97.7	97.5	91.6	97.7	98.1	92.5	98.7	91.6	97.4	91.6	95.44
LOC100470350	93.7	96.1	83.8	97.2	95.5	82.9	97.5	91.6	95.9	92.7	92.69
TMEM38B	94.2	94.6	75.1	94.2	95.9	75.6	96.6	76	95.9	76.4	87.45
RB1CC1	93.3	92.7	82.1	95.7	92.2	84.2	95.2	80.2	94.5	83	89.31
KDR	92.2	94.7	85.6	93.2	92.4	83.1	96	83.9	93.5	83.6	89.82
TP53BP2	90.5	91.5	84.8	89.4	90.6	85.4	91.6	85.2	89.1	84.2	88.23
AZI2	95.9	96.2	79.5	96.4	95.7	80.2	97.2	81.2	96.2	80.5	89.9
FANCB	84.3	90	46.9	82.7	90.2	46.7	84.3	47.9	88.1	48.2	70.93
DCPS	88.8	92.7	87.5	92.3	90	81.5	90.3	84.8	94.1	84.2	88.62
TSNAXIP1	91.6	93.7	75.6	91.9	93.3	74.1	94	77.4	93.4	75.7	86.07
ERLIN1	97.6	98.9	93.7	97.7	98.3	96.2	100	94.3	98.3	93.4	96.84
RTTN	92.1	90.5	80.4	87	92.5	81.8	88.9	80.3	89.1	80.6	86.32
CMTR1	99	98.3	89.8	92.2	98.6	90.2	92.6	89.3	91.7	83.7	92.54
GFUS	97.2	98.7	74.5	73.9	97.4	72.8	81.1	73.1	81.5	56.3	80.65
CCSER2	93.2	95.1	76.8	93.9	94.1	81.8	96.3	77.8	95.4	79.9	88.43
KLHL26	98.5	98.4	85.9	97.5	98.6	85.9	97.7	85.4	97.7	84	92.96
ROBO3	88.2	93.4	81.7	89.4	90.1	79.6	87.5	85	92.3	83	87.02
MCAM	87.5	88.9	69.6	86.4	86	66	88.7	71.2	85.3	65.4	79.5
PDPK1	97.7	98.7	92.9	97.6	97.6	92.9	98.7	93	97.4	92.3	95.88
POMGNT2	95.5	95.2	91	95	95.9	91.6	97.1	91.9	96.7	91.6	94.15
EDN1	88.6	89.6	76.2	92.9	90.6	73.3	94.1	74.3	93.5	76.9	85
PSMD2	99.4	99.6	95.3	99.4	99.6	95.3	100	95.2	99.6	95.3	97.87
TRAFD1	92.4	93.6	72.9	93.1	93.7	72.5	94.1	73.8	95.5	74	85.56
BCL6	97.8	98	93	97.2	97.6	92.1	98.3	92.8	97.8	92.3	95.69
TAF2	99.2	99.2	92.1	94.5	98.5	92.2	94.4	91.8	94.6	95.9	95.24
PSIP1	96	97.2	88.3	94.2	95.7	90.8	93.6	86.8	91.9	85.1	91.96
LOC117795239	83.8	84.7	54.7	76.8	86.9	54.2	77.9	51.2	81.8	46.8	69.88
TMEM164	98.2	99.7	95.3	100	98.8	94.7	99.1	95.6	100	95.7	97.71
GATA2	98.5	99.8	92.3	91	98.8	93.3	90.2	92.5	91.2	88.8	93.64
FAM124A	83.9	86.5	81.5	86.5	86.4	73.2	98	74.3	98	89.8	85.81
GOPC	96.3	95.9	86.2	96.5	99.1	89.2	99.8	89	99.4	89.4	94.08
SYNC	84.3	76.9	81.6	76.5	82	73.2	79.4	72.9	75.1	70.8	77.27
BSN	88	88.2	82.5	87.2	89.1	83.2	89.1	85.2	91.6	82.4	86.65
FAAP24	93.1	94.3	82.5	94.3	93.9	81.3	94.4	79.4	93.9	78	88.51
CARD14	80.9	72.1	69.7	85.4	77.8	71.9	84.2	62.4	71.8	67.5	74.37
ENAH	90.3	61.7	79.6	87.8	56.1	82.1	89.5	52.9	55.5	79.3	73.48
IRF2BP1	95.7	98.5	96.1	95.5	94.3	92.5	91.4	94.5	96.9	91.6	94.7
SLC22A6	95.3	93.4	83.7	84.2	93.4	82.8	85.4	84.9	84.2	77.4	86.47
USH2A	87.8	79.6	70.1	94	81.2	70.2	92.3	63.5	95.8	73.2	80.77
TP53	87.7	85.3	66	82.9	85.6	68.8	80.3	72.4	77.5	59.8	76.63
ANGPTL8	78.3	86.9	71.7	84.8	83.8	68.2	85.9	75.8	90.4	72.2	79.8
DNAL1	96.5	98.4	95.2	97.4	99.5	94.2	98.7	94.7	99.3	94.7	96.86
TNFSF13B	80.8	88.4	57.4	80.1	83.5	55.3	82.1	58.8	80	54.2	72.06
CACNG4	98.4	99.2	95.7	98	98.7	96.2	99.6	95.4	98.8	95.7	97.57
THADA	90.6	93.2	74.9	92.9	93.5	76.2	95.5	78.8	94.7	79.1	86.94
MRPL43	95.5	96.2	81.5	96.8	97.4	81.1	97.4	82.8	98.7	84.4	91.18
ACKR1	75.2	74.6	55.5	74.9	83.7	54.6	87	55.5	84.9	54.6	70.05
KLC4	98.4	98.5	94	98.1	98.9	94	98.9	93.9	98.9	93.9	96.75
WDTC1	99.7	99.9	97.2	99.9	99.9	97.2	99.9	97.3	100	97.3	98.83
MEF2C	85.7	100	98.6	99.2	85.7	84.5	82	98.6	99.2	97.5	93.1
GDAP2	98	98.8	91.7	99.2	98.8	90.7	98.4	91.5	99.2	91.3	95.76
CNOT9	100	100	100	98	100	100	98	100	98	98	99.2
SUDS3	99.6	97.5	91.8	89.5	99.6	98.6	99.6	90.2	98.5	90.5	95.54
RNF157	94.8	95.9	91.2	91.2	94.2	87.9	90.3	90.1	91.3	85.8	91.27
ANGEL2	90.4	90.6	74.9	90.7	99.1	81.4	99.3	81.6	99.4	82	88.94
MYPN	94.6	94.3	86.2	97.6	95.8	86.6	97.1	86.3	96.6	94.2	92.93
FASTKD3	78.3	85.6	65.9	84.4	82.5	63	82.6	67.8	88.3	67	76.54
CAVIN3	50.4	54.1	42.9	53.1	91.2	77	83.7	72.5	78	70.1	67.3
TOLLIP	97.7	97.3	92.6	99.2	96.3	90.5	96	91.3	95.7	91.6	94.82
NUMBL	91.6	94.2	90	87	89.9	86.4	90.5	87.8	87.6	83.9	88.89
TNK2	89.7	95	90.2	94.9	88.8	88	91.9	93.4	95.9	91.8	91.96
EPSTI1	83.3	82.9	55	86.3	79	44	87.8	50.6	84.5	47.5	70.09
FAXDC2	89.5	90.7	74.6	88.9	91	76	91.3	75.1	90.1	74.1	84.13
CRP	58.4	70.3	55.6	69.1	68.3	47.6	71.3	56.2	82.4	58.7	63.79
AP1AR	98	94	77.8	96.5	94	75.8	95.3	78.5	94.7	89.7	89.43
PCP2	97.1	97.1	84.6	91.2	94.1	85.3	89.7	83.1	89.7	81.6	89.35
LOC100469362	87.3	76.5	76.2	89.8	76	74.5	88	64.6	88.7	77.8	79.94
SUSD1	84.6	81	68.3	89.3	81.8	69.4	90.8	71.9	79.5	67.2	78.38
MYORG	97.6	97.9	92.9	85	98.3	92.6	85.6	92.7	85.9	81.1	90.96
ERBB2	95.6	95	85	94.9	97.4	85.4	97.7	85.2	97.5	85	91.87
SSPOP	80.8	84.3	71.5	79.1	81.6	69.2	79.2	71.4	82.7	66.8	76.66
PTCD1	85.7	86.8	74.6	85	90.2	78	92	77.5	90	76	83.58
L3MBTL3	82.5	83.9	65.8	89.8	96.5	76.3	95.7	74.5	95.2	85.5	84.57
CNOT3	95.3	93.8	91.3	95.8	95.6	92	94.4	89.8	94	89.5	93.15
DCBLD2	95.5	96.2	83.2	93.6	92.4	85.1	91.4	84.6	95.1	83.1	90.02
FAM216B	84.6	87	71	86.2	87.5	63.9	88.2	61.6	87.9	71.6	78.95
FER1L5	74.9	75.9	66.5	80.2	88.2	67.7	90.6	68.4	88.6	68.9	76.99
FGF21	90	92.3	74.3	87.6	88.5	74.8	89	76.2	86.6	70.5	82.98
NDUFS4	94.5	94.3	88	100	94.5	92.1	100	89.1	98.9	95.5	94.69
ITGAV	95.5	96.8	92.5	96.3	97.3	91.2	97.5	92.4	98.2	93.1	95.08
RNF168	87.7	87	62	88.9	88.6	66.4	90.9	65.1	88.4	65.9	79.09
NSUN7	90.1	87.4	67.5	88.7	92.8	66.6	92.4	66.6	92.1	65.2	80.94
TASOR	94.5	95.3	83.3	92.6	96.9	81.9	94.8	81.3	94.3	80.3	89.52
GATA4	92.3	95.5	92.6	98.3	95.9	90.1	98.7	92.1	99.2	93.3	94.8
PLA2G4E	91.9	92	73.9	91.7	94	77.3	94.4	76.2	94.1	76.3	86.18
RELL2	93.7	95.4	85.1	86.8	92.1	83.2	83.5	86.1	90.8	80.2	87.69
SLC12A8	89.7	92.4	77.8	89.9	89.4	76.6	91.5	78.1	92.1	71.7	84.92
FYCO1	70.5	78.9	66.2	79.6	72	59.9	73.2	62.3	76	62.4	70.1
CABIN1	90.8	92.6	85.8	94.4	91.1	82.6	94.1	84	97.5	89.7	90.26
THAP1	89.9	99.5	88.4	100	90.6	84	91	89.7	99.5	89.7	92.23
ADCY3	96.9	96.7	94	97	97.5	93.7	98.7	93.8	97	93.3	95.86
NEURL1	94.7	81.5	92.6	79	86.3	93	81.2	84.2	67.7	77	83.72
FBXL4	97.6	97.3	87	97.4	97.7	86.8	98.4	87	97.4	87.4	93.4
KIDINS220	95.1	97.4	91.7	100	95.8	88.1	100	91	100	100	95.91
ST6GALNAC5	93.5	89.6	87.6	97.2	93.4	89.6	98.4	88.7	97.6	92.4	92.8
CARD6	74.5	74.7	51.4	73.8	81.9	56.3	79.8	57.5	81.8	54.8	68.65
GCNT3	91.6	92	76	91.1	93.2	78.1	93.6	76.9	92.5	77.1	86.21
SMIM8	94.8	96.9	86.6	96.9	94.2	83.5	95.9	87.6	97.9	85.6	91.99
LLGL2	92.1	95.5	88	92.5	93.2	85.2	95.6	87.1	93.3	85.3	90.78
FGF23	90.5	90.9	74.6	92.1	95.9	73	95.5	74.5	96.3	74	85.73
EMC1	97	92.8	92.8	97.2	91.9	92.2	96.6	89	92.6	92.6	93.47
ST8SIA3	99.2	98.9	96.6	98.9	99.7	97.4	99.7	97.4	99.5	97.1	98.44
NFE2L3	74.4	82.8	62.7	76.3	73.5	59.9	81.9	63	79.5	65.5	71.95
ASB3	92.8	91.4	80.5	91.4	95.6	84.2	97.1	83.1	95.3	83.3	89.47
GKAP1	67	85.6	68.1	74.6	81.3	71	95.9	80.1	97.9	85.8	80.73
BORA	93.1	95	68	94	92.6	65.5	92.8	65.2	94.9	64.1	82.52
CREM	95.6	91.4	89.7	93.3	91.4	88.6	93	91.4	92.4	86.3	91.31
CUTC	98.5	77.4	91.9	97.8	77.4	91.1	98.5	73.8	77.1	91.5	87.5
LRRTM3	99.3	99.3	97.1	99	99.7	97.8	99.4	97.4	99.4	97.9	98.63
COMMD4	96.2	97.8	92.4	93.4	96.5	90.4	96.2	90.5	96.8	90.8	94.1
RUFY3	87.4	91.7	81	95.7	86.8	83.9	89.5	77.9	95.9	91.6	88.14
MRPS28	89	87.3	75.1	84.2	92.5	75.5	95.5	73.8	90.2	71.4	83.45
NMBR	91.5	91.3	85.4	90.3	92.8	85.6	91	85.1	89.3	84.6	88.69
POLI	89.6	92.8	73.9	91.7	92	62.9	94	71.6	93.3	72.8	83.46
METTL27	85.4	74.6	76.7	87.4	76.4	77.1	88.6	79.6	93	77.7	81.65
DAG1	91.9	96.2	91.1	92.9	92.9	89.8	97	92	93.7	90.2	92.77
SAXO1	91.8	91.4	56.8	91.1	93.6	56.1	91.1	53.7	91.4	54.8	77.18
PIK3R1	98.8	97.8	89.4	98.5	97.4	89.7	99.3	89	97	89.1	94.6
MLF1	88.1	82.1	74.6	88.1	96.5	81.1	97.2	80.7	96.5	80.1	86.5
CAPN6	98.6	98.8	95.8	98.8	98.6	95.2	99.2	94.9	98.8	95	97.37
IQCK	92.1	90.6	76	86.4	93.3	84.6	94.7	75.9	90.8	71.2	85.56
CACNG1	86.6	87.9	80.8	64.9	92.9	74.1	58.3	76.8	60.5	56.7	73.95
CILP2	88.6	92	75.8	92.9	91.7	77	90.7	76.5	92.1	75.7	85.3
GPR55	87.9	80.5	75.9	90.7	88.9	74	92.7	74.8	90.7	76.4	83.25
SLC1A3	97.6	97.8	95.4	98.6	98	96.1	98.6	96.1	98.2	96.3	97.27
GTF3C1	85.2	85.2	75	86.8	85.2	74.3	87.6	72.6	87.7	75.1	81.47
MUC4	76	76	62.1	77.2	83.8	64.9	87.5	59.4	34.6	68	68.95
TSPYL2	91.6	90.9	75.7	88.9	95.2	74.8	94.4	73.1	86.2	77.6	84.84
GINS4	97.3	96.4	89.7	97.3	98.7	90.6	98.7	90.1	98.7	90.6	94.81
BATF2	75.3	83.6	32.9	77.1	77.1	37.1	84	33.6	78.2	39.2	61.81
HDHD2	98.8	97.7	92.3	96.5	98.8	92.7	97.7	91.9	97.3	91.5	95.52
ABHD5	98.2	97	93.3	98.2	97.7	92.2	97.7	91.2	96.5	91.7	95.37
ABHD15	86.8	91.9	84.9	94.4	91.9	83.8	93.1	89.7	94.8	87.6	89.89
ZBTB20	95.8	99.7	94.3	98.4	95.8	95.3	97.2	94.5	98.4	93.1	96.25
JUNB	99.1	99.4	90.5	83.9	99.1	90.2	83.5	90.5	83.9	79	89.91
PLEKHM3	96.8	97.9	91.5	97.3	97	90.6	96.6	91.3	97	90.6	94.66
HPS5	88.1	88.7	79.1	81.8	86.9	78.4	84	77.4	83.1	73.2	82.07
MYLK	91.6	93.7	81.1	99	92.4	83.7	99.3	81.6	98.7	96.4	91.75
CATSPER3	89.6	93.5	66.3	86.9	91.2	66.9	86.9	66.5	87.8	62.6	79.82
ETS2	95.1	95.5	88.3	87.9	96.6	89.8	88.7	88.5	89.3	81.4	90.11
MYRFL	76	77.1	69.5	79.8	91.4	75.8	93.6	76.8	93.1	66.8	79.99
PRC1	94.3	93.9	82.6	93.9	94.3	81.4	94.5	82.1	97.9	81.8	89.67
NUAK1	93.1	92.4	85.1	95.4	96.3	85.5	98.4	85.2	97.7	88.8	91.79
SERPINB11	87.7	92.3	68.9	92.3	89.5	67.3	89	67.9	94.4	67.9	81.72
LOC100463568	76.9	77.7	65.8	72.9	86.8	66.1	83.8	69	82.3	64.3	74.56
NCKAP5	84.5	83.6	62.1	82.8	87.2	62.4	85.6	63.3	86.2	62.9	76.06
SPATA32	61.6	56.2	35.6	65.9	64.7	42.8	71.3	33.3	70.6	38.9	54.09
MYMK	96.8	95.9	87.3	96.8	93.2	86.9	95	86	94.6	86.9	91.94
ST3GAL4	94.9	96.5	88.2	96.8	97.3	89.6	97.6	90.4	98.5	91	94.08
XIRP2	75.2	77.9	60.3	77	85	63.6	85.2	65	87.2	65	74.14
TRNAU1AP	99	97.6	98.6	99.3	97.2	98.3	99.3	96.8	97.6	98.6	98.23
FOXN4	90.9	86.2	79.2	92.4	85.6	76.4	92.8	73.4	86.7	78.5	84.21
SERTAD4	92.7	94.9	74.9	93.3	95.7	73.1	97.1	73.6	96.3	74.1	86.57
ANKRD6	86.6	88.8	75.3	86.6	92.8	77.8	95.3	81.7	90.9	79.2	85.5
TRDMT1	90.3	93.4	79.3	93.3	90.2	76.8	94.1	80	93.5	79.6	87.05
ANKRD16	73.2	86.9	50.4	90.1	64.7	60.4	72.8	51.3	89.8	53.5	69.31
BRDT	85.2	90.2	73.9	90.3	85.8	70.7	91.2	71.8	90.2	78.3	82.76
DGAT2	96.4	99.7	94.7	99.4	99.1	97.1	98.6	96.6	96.4	90.7	96.87
DYNLRB2	89.1	97.9	99	99	89.1	88	90.2	96.9	99	97.9	94.61
C3H5orf46	82.7	78.3	63.2	84.3	70.4	62.6	80	57.8	87	63.2	72.95
MOSPD2	97.3	97.9	89.4	97.7	96.9	88.4	97.5	88.4	97.5	88	93.9
OPRK1	92.9	94.7	92.1	90.3	96.3	88.7	95.8	89.7	93.4	87.1	92.1
NRK	91.2	87.5	63.2	84.4	84.7	64.3	85.6	63.6	89.3	59.6	77.34
C8H1orf100	80.1	76.8	59.4	76.9	87.5	66.2	85.9	66.2	86.2	68.4	75.36
TNP1	94.5	80	54.5	94.5	85.5	60	100	70.9	85.5	60	78.54
TM6SF1	95	97.8	94.3	98.6	95.7	91.5	95.7	94.3	98.6	93.5	95.5
TANC2	96.8	99.1	92.7	95.9	96.7	93.2	98.3	92.3	95.9	96.5	95.74
ODF1	100	99.6	86.8	91.6	99.6	86.8	91.6	86.3	92	77.9	91.22
MRPL19	91.8	91.8	81.2	92.8	92.5	81.2	93.5	81.5	92.8	81.6	88.07
SERINC3	94.5	96.6	78	94.9	94.5	76.7	95.6	78.2	96	77.4	88.24
PYM1	89.2	90.6	79.4	91.7	94.3	83.3	93.8	82.2	96.4	82.8	88.37
SCRIB	79.3	86	76.6	69.5	84.9	75.8	74	79.8	75.3	71.4	77.26
LRTM2	94.3	98.6	90.3	94.3	94.1	87	96.8	90	93	87	92.54
VWA5B2	89.1	88.1	77.1	86.7	90	78.6	90	80.1	88.8	75.5	84.4
THNSL2	91.2	91.8	80.5	91.4	92.9	83.3	93.5	82.6	92.3	82.2	88.17
GPR156	80.1	80.6	62.5	78.4	89.8	66.7	90.2	65.7	90.2	66.3	77.05
NOL3	85.9	85.9	81.8	84.6	93.8	85.4	93.8	82.2	92	82.2	86.76
DCAF12	91.3	91.3	93.2	91.5	99.6	98.2	99.6	97.8	99.6	97.8	95.99
LOC100478860	95	94.5	82.8	91.6	93	81.5	91.2	80.1	91.4	80.7	88.18
SYAP1	83.8	87.6	76	86.4	80.4	66.7	81.4	76.8	92.7	77.3	80.91
VWA2	85.9	90.7	76.3	83.6	89.3	75.5	85.2	77.8	86.6	72.4	82.33
DRD2	96.4	94.6	93	94.4	93	90.3	94.4	94.1	90.8	88.8	92.98
DPH1	91.6	84.5	85.6	91.4	85.9	83.9	93.2	78.2	85.4	85.2	86.49
PACRG	99.1	99.2	93.8	97.7	98.1	94.4	97.7	93.8	96.5	93	96.33
RNF141	98.9	97.3	95.6	98.4	97	95.7	98.3	95.7	96.5	95.2	96.86
ZNF438	73.5	70.4	56.7	71.3	78.9	59	80.3	56.3	73.8	53.8	67.4
LRFN5	95.5	97.5	95.6	93.4	93.9	96.2	97.1	93.9	92.8	93.8	94.97
WDR6	95.8	97.1	87.4	96	96.7	86.7	96	86.8	96.2	87.2	92.59
RAB39A	97.2	97.2	94	96.6	99.4	96.6	99.4	96.8	99.5	96.6	97.33
ZNF205	68.3	82.9	48.9	67.1	66.7	45.1	67.9	47.1	67.4	48	60.94
RO60	98	97.9	90.5	98.3	97	90.1	97.4	90.3	97	89.8	94.63
ADD3	98.2	96.5	90.2	95.2	98.4	90.1	96.2	91.6	98.2	88.2	94.28
CCDC181	89.4	93.1	76.1	91.5	89.4	74.1	87.8	75.1	89.6	72.5	83.86
PARN	89.9	90	79.9	87.1	96.6	83.1	96.9	83.1	96.5	90.4	89.35
HAX1	91	82	74.6	87.2	88.6	80.7	87.7	72.3	89.6	78.2	83.19
ZC3H4	92.9	94.7	78.3	91.5	94	77.8	93.2	78.9	94	76.9	87.22
XK	95.3	95.9	81.4	95.6	96.8	80.7	96.7	80.9	96.7	79.6	89.96
GPR45	94.9	95.4	86.1	95.7	94.6	86.9	95.7	86.9	95.7	85.8	91.77
RNF213	76.2	79.3	64.8	79.3	81	61.7	85	63.2	87.4	67.4	74.53
EPB41L5	89.7	89.9	78.2	96.9	93.2	82	96.7	77.1	NA	89.8	88.1667
ASB9	92.8	87.4	68.3	85.8	87.7	67.6	86.7	74.1	94.4	73.7	81.85
MBD6	84.9	82.1	80.9	91.5	89.4	81	90.2	82.6	86.7	85.5	85.48
CNDP1	93	88.5	78.6	87.7	94.4	82.6	94.4	83.3	94.2	82.5	87.92
LOC100468117	90.1	82	71.9	91	68.8	65.7	93.2	82.1	73.4	84	80.22
ME2	96.1	97.6	87	97.3	96.7	87.4	97.6	86.8	97.8	87.2	93.15
CLOCK	94.2	90	87.8	89.6	94.6	87.7	94.5	85.9	93.5	85.6	90.34
ZDHHC16	99.2	98.9	93.6	98.4	99.2	93.9	98.7	93.9	98.9	93.4	96.81
TSPAN11	93.7	93.7	84.9	93.2	95.3	87	97	86.2	95.7	86.8	91.35
GPR1	93.8	93	78.6	95.8	93	76.6	96.3	78.3	95.2	78.3	87.89
TEX33	77.8	78.2	61	77.8	83.8	60.3	85.2	61.4	83.1	58.8	72.74
SETD4	86.1	86.2	70.9	91.1	90.1	74.3	86.8	75.2	85.7	68.1	81.45
NSMCE2	91.7	90.9	80.1	95.6	97.1	86.2	96.7	86.2	94.4	90	90.89
SPON1	98.6	98.1	96.3	92.6	98.3	96.2	92.6	95.7	91.5	90.3	95.02
C8H11orf42	82.7	83.9	77	79.4	94.6	89.5	93.7	87.7	91	86.2	86.57
SLC29A2	96.1	96.9	86	95.6	96.3	86.3	96.5	86.7	95.6	86	92.2
MEX3A	97	97.7	93.5	87.9	98.3	93.5	87.5	94.9	89	86.6	92.59
HERC6	78.6	81.4	63.7	79.9	84.5	62.2	85.7	63	85.8	63.6	74.84
ARG1	94.1	96.4	87.6	95	96.4	86.7	97.8	89.2	97.3	87	92.75
CRYBA2	99.5	93.4	89.3	97.5	93.9	89.8	98	92.4	95.9	91.4	94.11
PHYKPL	93.1	93.7	86.6	91.3	96.3	85.5	95.4	86.9	93.2	85.1	90.71
RFX6	93.5	94.3	82.4	93.9	96.7	82.8	96.7	83.2	97	83.1	90.36
GGT5	80.9	82.7	70.9	78.4	91.7	79.2	87.6	78.1	90.8	76.8	81.71
LCN6	79.3	89.1	69.7	77.3	84.4	69.1	79.3	73.4	79.7	67.4	76.87
ABRAXAS2	97.1	97.8	92	98.3	95.9	90.9	97.4	91.5	97.6	91.7	95.02
ATP4B	91.7	91	81.6	90.8	93.8	83.9	93.5	83	92.2	83	88.45
NUCKS1	100	100	100	98	100	100	100	100	100	100	99.8
DOK2	86.7	87.5	71.4	87.5	85.1	71.4	89	73.6	86.4	73.1	81.17
TOP3A	88.8	91.3	84.9	86.7	92.1	81.7	88.7	83.3	89.1	78.7	86.53
ARSI	98.3	98.4	95.5	96.5	98.4	95.5	96.8	95.5	96.8	94.4	96.61
MRPS12	91.4	90.6	84.9	91.4	89.2	82.7	92.1	85.6	89.9	84.2	88.2
CLEC2L	99.2	90.2	87.9	89.6	85.5	81.5	84.4	95	97.8	94.4	90.55
JAML	83.9	79.3	57	85	86.9	57.1	91	56.9	87.5	59.8	74.44
VMP1	97.5	97.8	92.9	98.3	99.3	93.6	99.6	93.8	99.6	93.3	96.57
ACAP1	87.8	84.7	80	86.5	92.7	86.4	93.8	89.5	90.6	83.4	87.54
LOC100474992	91.7	85	67	94.2	83.5	67.6	95.9	66.7	85.7	67.6	80.49
NOCT	98.9	94.7	94.6	96.8	97	95.6	99.5	87.1	90.5	89.9	94.46
LOC100473137	72.8	81	58.6	81.9	72.8	53.6	83.4	58.3	80	56	69.84
CCDC175	61.4	73.3	47.7	72.5	70.5	42.7	71.8	47.7	85.5	48.1	62.12
ZNHIT2	90.2	90.9	80.7	56.1	93.5	82.5	58.3	82.2	57.8	53.3	74.55
DENND11	90.5	96.5	96.8	97.4	92	92	92.8	97.5	98.6	98.9	95.3
TOX	98.3	97.7	92	97.4	99.4	90.9	99.7	90.3	99	88.9	95.36
KMT5C	91.1	88.6	78	94.9	89.8	77.8	97.6	73.6	99	92.1	88.25
GANAB	96.6	97.8	91.3	95.9	97.8	91.8	96	92.1	96.9	90.5	94.67
CCHCR1	79.2	82.6	54.3	82.8	83.1	58.1	80.7	52.2	84.2	57.4	71.46
MRTFA	84.4	91.8	81.5	77.6	87.4	74	76.5	80.2	80.1	65.7	79.92
CDKL3	85.2	79.2	72	87.2	79.1	78.3	94.9	68.7	93.6	93.2	83.14
LRRK2	91.7	95.1	83.5	95.4	91.5	81.2	92.2	83.4	96.7	84.8	89.55
MRPL37	89	90	78.2	90.7	93.1	80.5	92.5	80.6	93.5	79.4	86.75
CROT	87.4	87.6	80.4	87.9	92.8	82.1	93.1	83.2	92.5	82.5	86.95
VASH2	98.5	87.4	97.4	98.1	88.1	96.5	98.7	85.9	87	95.9	93.35
CR2	84.9	84.5	65.1	85	89	65.7	89.8	64.9	89.5	65.6	78.4
FKBP11	97.8	97.2	91.7	97.8	98	89.1	97.8	90	98.4	91.3	94.91
SLC7A9	94.7	97.4	87.4	93.8	94.4	88.8	96.1	89.3	94	89	92.49
BTAF1	98.8	98.8	96.3	98.8	99.2	95.9	99.3	95.9	99.1	95.9	97.8
RSPO2	98.6	99.5	97.6	95.8	98.4	93	97.7	93	97.1	97.1	96.78
CA6	76.1	80.6	51	80.8	80.2	49.5	82.5	48.7	84.7	48.1	68.22
MAPKAPK3	90.9	92.5	89.1	93.5	97.1	90.6	99.2	92.4	98.9	94.6	93.88
STRADA	99.3	97.6	94.4	99.3	97.3	94	99	92.2	97.4	94	96.45
CNPPD1	81	81.3	88.9	80	94.2	84.2	94.6	83.9	94.9	83.7	86.67
SPRY2	96.5	97.8	93.7	97.8	96.8	93	97.5	94.6	98.7	94.9	96.13
CTTN	95.3	92.9	95.3	95.3	87.4	83	83.9	87.7	95.1	87.5	90.34
XIAP	89.3	90.1	85.1	89.5	96.8	88.7	97.8	88.7	97.2	88.3	91.15
NSUN2	89.8	93	84.4	93.1	93.7	84.5	89.7	86.3	91.5	85.6	89.16
CTU2	75.8	77.5	70.4	75.8	85.4	68.1	81.8	70.6	82.8	69.4	75.76
SLC27A4	87	87.1	82.9	86.7	95.5	92.1	97.2	90.4	95.5	91.3	90.57
RASSF5	95.2	96	71	92.1	98.9	92.5	94.4	93.8	94.9	91.6	92.04
CCNO	92.6	93.2	79	92.6	92.6	78.7	93.5	81.3	96	80.7	88.02
IL6ST	92.2	95.6	77.1	95.7	92.6	73.9	92.7	75.3	95.6	76.1	86.68
ARHGAP29	90.6	93.3	81	92.4	92.3	80.2	92.2	81	93.2	80.8	87.7
PTCH1	98.1	98.1	92.9	92.6	98.5	93.5	93.6	93.5	93.2	92.1	94.61
CCNK	100	100	99.6	100	98	95.2	96.8	99.6	98.8	99.6	98.76
FAM219B	73.5	73.5	70.2	74	93.9	80.3	93.4	82.3	94.9	83.3	81.93
TNFSF15	91.4	91.8	63.4	90.6	96.1	65.5	93.7	66.7	94.5	65.9	81.96
MAP3K9	94.7	96.5	88.9	94.3	94.8	87.5	96	86.7	94	84.7	91.81
SPATA46	86.9	78.8	63.6	64.8	81.6	64.2	66.7	65.9	78.3	62.7	71.35
PSPC1	89.1	67.6	87.2	99.5	75.4	96.6	100	72.9	100	100	88.83
SLITRK3	95.9	95.8	91.3	96.6	97.2	93.6	93.2	93.1	93.5	88.4	93.86
NUBPL	90.9	87.7	88.2	94.8	88.6	86.6	95.7	83.6	81.9	88.8	88.68
CRNN	60.6	46.6	32.2	55	51.6	43.2	67.6	45.5	48.4	48.6	49.93
FAM149B1	93.3	92.5	77.7	96.5	96.1	81.8	88.8	81.6	88.5	81.5	87.83
RIOK1	93.3	95	81.4	94.7	94.7	79.9	95.5	81.3	95.5	80.6	89.19
ZNF263	86.7	95.6	75.2	95.6	86.8	76.2	87.2	75.2	96.6	75.7	85.08
PDGFA	93.5	96.1	93.5	97.5	94.4	93.2	95.5	93.2	96.9	89.6	94.34
FAM187A	87.9	88.3	79.4	87.6	89.1	77.5	91.7	77.1	89.8	78	84.64
CTNS	90.6	88.9	80.9	90.9	93.3	82	95.4	80.4	93.8	82.6	87.88
TP73	95.7	96.2	89.1	90.7	95.2	89.8	91.9	87.4	93.7	85.6	91.53
ALKBH1	92.8	94.3	83.5	93.3	94.6	83.8	96.6	84.3	95.4	84.6	90.32
CCDC157	85.6	84.3	76.9	82.9	78.3	77.2	83.8	67.3	76.4	74.1	78.68
HEG1	64.3	69.5	50.2	60.6	73	53.9	67.7	51.7	73.7	48.4	61.3
ZNF839	63.8	64.6	42.4	58.3	63.6	44.5	71.5	41	61	44.6	55.53
MGRN1	93.3	94.1	80.8	91.6	98.3	86.3	96.2	86.2	97	85.7	90.95
FGF20	99.5	99	96.4	99.5	99.5	95.7	99.5	95.3	99.1	95.7	97.92
FAM120B	74.9	86.8	66.9	77.8	81.1	78	90.7	73.3	90.5	82.4	80.24
FLT1	89.7	94	82.1	95.1	88.5	77.3	89.8	80	93.8	81.7	87.2
C2CD3	87	88	72.6	87.1	91.4	74.1	91.8	75.4	92	74.6	83.4
ARL6IP4	100	100	95.1	100	100	94.3	91.9	94.3	100	94.3	96.99
PTPN7	93.6	93.3	90	93.6	95.3	90.3	96.9	91.1	95.6	90.8	93.05
OCRL	96	96	87.3	94.9	98.9	89.9	97.9	89.9	97.8	88.9	93.75
DENND4A	94.9	97.2	90.2	94.8	95.2	91.3	97.9	89.3	94.8	91.7	93.73
WDR4	89.6	88.1	72	88.1	87.6	69.8	89.5	75.1	87.6	66.1	81.35
LMCD1	97.2	96.9	92.2	99.1	96.4	90.4	98.1	89.9	98.1	91.2	94.95
PARP9	72.3	78.3	58.1	80.1	82.8	58.8	85.2	59.9	82.5	58.2	71.62
CD19	79.5	90	63.5	83.1	82.9	58.5	82.9	65.5	86.3	63.5	75.57
LRRC17	86.5	88.4	82.2	86.4	94.8	84.5	93.8	84.9	93.2	84	87.87
IL4R	68.4	74	53	70.6	79.4	48.7	76.9	49.3	74.1	43.8	63.82
USP33	95.7	97.1	90.5	98.2	98.5	91.6	96.3	92.4	97.8	91.2	94.93
FAM171B	89.1	93.8	85.6	93.9	91.1	85.4	91.3	85.7	96.6	87.6	90.01
VGLL4	99.7	99.3	80.1	98.3	99.7	79.7	98.9	80.1	98.9	73	90.77
PPM1E	97	97.5	90.5	97.3	97.5	91.2	97.5	89.1	97.5	88.9	94.4
MID1IP1	95.6	96.7	86.3	92.3	98.4	88.6	95.1	90.2	95.6	86.4	92.52
LOC100477217	98.6	91.9	80.5	94.8	98.1	83.9	97.7	77.3	94.5	79.1	89.64
GAL3ST1	96	97.4	85.1	96.9	96.2	84.2	97.4	84.7	96.5	84.5	91.89
IDUA	77.8	74.5	68.2	90.9	92.2	80.4	95.2	80.6	94.7	86.1	84.06
UBAP1L	77	75.4	68.3	76.5	81.6	67.6	73.7	69.3	73.1	63.6	72.61
DLST	98.3	98.8	91.3	97.6	98.5	91.4	97.6	92.1	97.2	90.6	95.34
RAD54B	92.1	90.4	76.5	93.3	94.7	81.1	94.4	75.7	96.4	81	87.56
USP25	96.5	98.3	93.4	94.3	97.6	91.6	95.9	92.7	96.8	91.6	94.87
KLK4	90.4	90.1	70.2	88	92.9	71	94.9	70.2	90.9	71.8	83.04
FAM110B	88.5	86.9	82.9	75.6	97.3	87.3	81.1	84.6	80.3	79.3	84.38
ABRACL	97.6	96.3	92.6	69.6	98.8	91.2	100	92.6	98.8	91.4	92.89
ERO1A	97	98.5	91.5	97.4	97.2	90.6	97.2	90.8	97.6	90.4	94.82
USP49	95.5	92.7	87.5	95.8	90.4	85.2	95.8	85.5	92.1	86.1	90.66
MOV10	96.1	97.5	90	97	97.2	90	97	90.6	97.8	89.7	94.29
EIF2B5	93.7	93.1	88	91.2	95.1	89.3	92.7	87.3	91.6	85.2	90.72
TRIM59	95.5	87	84.3	95	89.6	86.8	95.8	81.1	86.8	84.6	88.65
HRH4	89.2	89.4	65.6	87.7	90.6	65.2	90	66.3	90.6	64.6	79.92
MCPH1	73.8	73.2	53.2	69.3	78.2	53.8	78	53.2	75.8	49.5	65.8
POLR1A	95.6	95.5	86.8	94.1	94.9	87.4	94.4	86.1	96.6	86.5	91.79
ENTPD1	85.5	86.7	71.4	87.5	91	72	93.1	71.9	92.7	73.6	82.54
CUL7	94.7	90.1	78.6	93	90.5	78.3	94.4	74.9	89.7	78.6	86.28
IL13RA1	93	95.4	74.9	99	95	71.1	93.9	76	97.7	76.1	87.21
METTL26	76.7	75	70.4	77.2	96.2	89.2	99.3	87.6	99.3	90.6	86.15
UBXN7	99.4	99.6	98.8	99.4	99.4	98.3	99.6	98.5	99.4	98.3	99.07
RAB3GAP1	94.8	97.9	90.8	94.3	95.9	90	98.8	91.7	95.7	89.9	93.98
RIPOR3	90.2	87.5	73.2	92.1	90.7	73.7	93.5	73.8	91.3	74.2	84.02
TMEM267	96.3	96.7	72.3	96.3	97.7	74.9	99.1	75.8	97.7	74.9	88.17
TERF1	76.8	78.8	60.8	81.3	76.5	57.6	85.7	62.3	81	64.4	72.52
LOC105235296	90.7	92.9	88.7	94.4	88.2	82.8	90.4	82.4	89.4	85.9	88.58
DDB1	96.7	100	99.6	99	96.7	96.3	95.7	99.6	99	98.6	98.12
PHF13	94.9	94.9	89.2	98.2	95.1	88.1	98.2	89.1	96.4	95.1	93.92
PRKRIP1	100	100	94.1	99	100	96.4	100	96.2	100	94.1	97.98
NOL8	77.8	77	52.2	75.4	83.4	54.9	84.8	52.8	82.3	52.8	69.34
YIPF2	90.8	90	80.1	88.4	92.3	82	94.5	82.3	92	82.7	87.51
PPM1D	96.2	92.1	84.8	92.7	98.7	90.7	98.7	87.8	94.2	87.8	92.37
RAMP3	93	96.9	86.6	97.4	88.6	80.6	96.6	83.2	97.4	87.1	90.74
PTGR1	93.2	94.9	83.7	92.2	94.8	82.1	92.4	83	92.4	80.5	88.92
RNF217	100	100	99	100	99.3	97.2	99.2	72.8	99.2	96.4	96.31
BBS2	94.1	91.7	88.9	91.3	95.1	91.8	95.6	89	92.1	89	91.86
TSC22D1	74	84.3	73.6	78.7	82.9	72.2	73	70.8	86.4	61.9	75.78
IFT80	97.8	97.3	95.5	98.9	97.7	95.4	98	95.4	97.6	95.6	96.92
TMEM144	92.2	92.8	82.9	89.1	96	84.8	94	84.8	92.2	83.3	89.21
ZFYVE19	86.2	84.1	72.9	80.5	83.8	70.7	81.5	78.9	86.8	76.7	80.21
JAKMIP1	96.6	95.7	90.3	95.5	98	92.8	97.7	92.4	96.8	91.2	94.7
HEXIM1	100	100	97.9	100	96.1	85.5	86.1	85.5	85.5	79.8	91.64
SLC5A9	90.7	91.1	83	87.3	93.5	81.9	91.8	82.1	89.8	79.2	87.04
ERP44	79	78.7	72.7	75.2	96.8	89.4	100	92.4	99.7	93.1	87.7
FAM219A	81.7	88.1	97.4	100	94.4	84.4	84.9	90.3	86.6	97	90.48
LOC117795426	94.3	95.4	88.2	95.2	96.6	84.7	96.4	85.9	95.2	85.4	91.73
TAF1A	90.4	90.2	76.7	91.6	92.4	77.8	94.7	77.6	95.1	77.3	86.38
IFT88	97.9	96.4	91.4	97.8	99.1	97.5	98.5	89.8	98.8	96.2	96.34
ABHD6	98.2	98.9	93.7	98.2	98.6	94	98.2	95	99.3	94.3	96.84
OSM	74.2	76.7	46	74.1	75.8	39.3	82.7	41.9	74.8	42.7	62.82
SUPT20H	98.3	96.3	71.7	86	97.5	70.5	86.1	70.3	86.5	82.6	84.58
MSC	98.5	96.5	74.1	82.4	97	73.6	82.8	72.6	81.1	61.8	82.04
GHRH	78.8	86.9	62.1	86.5	81	62.1	80.8	60	88.6	61.1	74.79
TCTN2	84	85.5	65.2	82.4	86.1	66.1	85.8	67.3	84.3	64.8	77.15
SYNJ2	92.4	83.9	82.2	93.1	93.7	83.3	89.5	75.8	90.4	86.1	87.04
INPP5B	95.3	95.9	85.1	97.6	86.8	75.3	93.7	80.2	87.5	76.7	87.41
SGCZ	79.5	95.8	93.9	91.5	77	75.5	85.1	95.8	96.9	94.6	88.56
HSDL1	97	96.2	86.7	81.5	96.2	86.7	80.6	86.2	79.9	73.9	86.49
DHRS7B	92.6	94.3	78.6	94.7	92.5	76	93.1	79.2	93.9	78.1	87.3
CD34	70.4	74.2	65.3	93	77.6	59.4	78.5	64.1	94.8	81.4	75.87
DBT	79.3	88.6	86.3	94	77.8	74.3	80.7	84.6	90.5	86.3	84.24
FOXN2	98.4	98.6	76.1	98.6	98.4	75.6	98.9	75.6	98.6	75.9	89.47
IL1F10	94.7	93.8	81.6	94.7	95.4	82.9	96.7	82.2	96.7	82.2	90.09
PIP4K2B	97.3	99.4	97.8	100	96.7	94.6	97.3	97.2	99.4	97.5	97.72
NUP85	97.7	98.3	90.5	98.2	98.3	89.5	98.6	90.2	98.6	90.1	95
GOLGA1	82.8	84.2	57	77.9	91.1	56.4	78.7	54.2	78.5	59.2	72
NTF3	95.8	95.9	94.5	89.9	97.3	95.5	90.3	95.6	91.1	88.8	93.47
LMAN2	99.7	99.4	96.2	99.7	99.7	95.9	100	95.6	99.7	95.9	98.18
RHEB	100	100	100	100	100	99.4	97.2	99.4	95.9	98.8	99.07
TEKT3	93.1	94.9	82.7	95.7	92.9	80.8	93.3	82.7	94.7	83.9	89.47
MAPK15	75.9	67.9	68.1	77.6	73.1	72.9	81.3	62.8	71.9	66.7	71.82
ARHGAP23	73.2	88.2	87.9	93.2	66.2	73.7	72.7	79.4	85.2	81.5	80.12
SP9	100	100	94.5	100	100	93.1	100	96	100	93.7	97.73
TMEM41A	94.3	97	88.6	96.2	94.2	87.1	94.5	88.6	98.5	87.8	92.68
SLC16A13	81.2	83.3	77.5	82.7	91.5	84.8	94.5	86.2	93.5	86	86.12
NADK	85	93.6	91.3	95.9	85.9	81.6	85.6	91.6	97.3	91.8	89.96
RDH5	92.4	91.5	84.5	90.9	94.3	85.5	95	84.5	93.1	85.3	89.7
TMEM150C	97.2	100	94.8	100	97.2	93.2	97.2	94.8	100	94.8	96.92
SERPINE1	92.8	92.6	76.4	94.8	91.6	76.9	95.3	74.9	93.4	77.6	86.63
ASGR2	82.2	85.2	64.6	83.8	82.2	62.5	86.5	64.1	89.2	63.7	76.4
HSD17B11	92	92.8	81.5	92	94.3	81.9	94.3	81.2	94.3	80.5	88.48
ADM	86.2	89.7	65.4	84.9	94.1	64.2	92.5	67.2	92.6	65	80.18
ZNF483	82	77.4	52.2	67.4	91.1	66.5	85.4	50.8	82.6	53.1	70.85
MYOZ3	88.4	76.1	72.7	87.2	75.4	70.4	86.1	61.3	74.6	66.8	75.9
NCAPD3	89.5	90.9	69.2	89.3	92.8	69	93.3	69.5	93.8	68.3	82.56
NUDT17	88.4	84.1	68.6	89.1	84.2	67.1	89.5	62.9	84.5	67.2	78.56
SERPINF2	93.9	94.1	74.5	93.3	93.9	74.7	94.3	75.2	94.1	74.5	86.25
CEP85	94	83.9	83	90.2	83.5	81.7	92	77.5	84	82	85.18
IL21	82.2	90.4	64.3	84.3	83.7	62.1	83	62.9	83.7	61.7	75.83
PKNOX1	97.9	99.1	95.2	98.4	98.4	95	98.6	95.6	98.9	95.6	97.27
RPN1	98.2	98.2	94.7	98	98	94.2	98	94.2	97.9	94.1	96.55
PCLO	83.9	81.8	75.1	76.8	90.7	81.2	92.6	80.2	91.3	80.6	83.42
NECAP1	89.2	96.5	90.8	89.2	92.7	86.5	98.5	87.7	92.7	86.2	91
SREK1	98	100	87.3	98.4	98	89.3	96.4	87.3	98.4	87.4	94.05
TRPS1	84.7	98	92.9	71.3	84.5	79.9	89.4	92.7	70.5	65.5	82.94
CPPED1	92.9	94.9	83	89.4	94.1	84.5	93.6	82.7	93.1	80.4	88.86
KCNJ2	99.3	99.3	98.1	99.3	100	98.4	100	98.4	100	98.3	99.11
CCSAP	91.1	88.4	57.8	89.6	89.1	77.6	94.5	84.2	92.2	78.1	84.26
SNAP25	85.9	85.9	85.9	85.9	100	100	100	100	100	100	94.36
LDLR	86.6	89.4	72.6	86.8	91.2	76	88.9	76.2	91.2	75.1	83.4
TTLL7	90.1	94.7	84.2	94.1	93.2	77.9	85.5	83.5	92.5	85.6	88.13
ZIC3	97.6	99.6	97.4	94	97.2	95.3	94.8	97	93.5	93.8	96.02
LOC100467027	92.9	94.6	76.1	94.9	94.1	75.2	95.1	77.3	96.5	75.4	87.21
HOMER1	100	100	96.3	99.4	100	96.3	99.4	96.3	99.4	98.8	98.59
ADAMTS7	76.5	78.8	68.1	79.9	79.3	68	82.1	68.4	80.4	69.6	75.11
UBE2Z	100	100	100	100	100	98.1	100	100	100	100	99.81
SPPL2A	94.6	94.6	77.6	89.7	97.9	80.3	92.2	78.9	91.7	75.9	87.34
PHF14	96.9	99.5	93.3	97.1	93.7	91.6	95.7	89.4	92.5	93.1	94.28
GCM2	86.4	89.3	69.8	88.5	88.2	68.3	89.2	70.2	87.8	68.4	80.61
PNOC	88.6	91.3	64.9	91.4	90.2	67	92	65.1	93.6	67	81.11
SLC35B3	98.3	97.9	86.1	98.9	98.1	84.9	98.4	86.1	98.4	91.1	93.82
ELFN2	95.6	96.1	90.9	95	97	94.9	97.8	93.6	96.8	94.1	95.18
RCN3	81.5	95.8	92.4	94.8	82.1	76.9	81.8	90.3	97.3	89.4	88.23
CCDC14	85.9	88.4	64.3	85.9	87.6	63.5	88.6	63.2	90	63.1	78.05
PCYT1B	99.7	99.4	99.2	98.2	99.4	99.5	98.5	99.4	98.2	97.9	98.94
TAB2	96	89.6	86	96.8	89.9	84.7	99.1	86	90.2	84.6	90.29
FMO2	91.8	93.2	84.6	93.2	93.2	84.3	95.5	84.5	94.7	87.1	90.21
EVX2	80	83.7	93.9	97.7	81.7	77.1	99.7	84.3	97.8	93.7	88.96
DNAJB11	99.6	99.2	97.7	100	99.4	96.9	99.7	96.4	99.2	96.6	98.47
EMID1	90.6	87.5	66.7	84.1	90.9	72	88.6	62.4	90.5	71.4	80.47
PRPH2	97.4	97.1	93.6	98.5	96.2	93.9	97.8	91.9	98.1	92.9	95.74
STEAP1	87.9	89.1	78.8	92.9	92.3	78.5	90.6	79.6	92.3	77	85.9
SH3RF2	92.6	91.5	80.3	89.2	89.2	77.7	91.5	77	84.3	73.8	84.71
PDZRN4	88.3	85.6	82	79.1	88.9	85.6	87.4	73.7	93.8	78.4	84.28
EFCAB6	85.1	84.9	64.8	88.3	86	63.7	88.9	63.4	88	74	78.71
CDCA4	86.4	88.9	70.7	86.4	87.6	67.4	85.5	70.2	88.8	66.5	79.84
ARHGAP6	89.5	90.9	81.9	92.3	91.8	82.7	90.4	84.1	89.5	79.8	87.29
PARD3B	90.8	92.9	80.6	97	93.7	80	96.3	81.6	98.7	78.9	89.05
GPSM1	97.8	97.3	86.5	98.2	97.5	85.8	97.7	86.4	97.4	86.2	93.08
NFKB2	95.6	95.9	88.9	94	98.1	89.6	96.2	89.8	96.7	88.5	93.33
GREB1L	96.1	95.5	90.5	97.9	97.6	88.6	98.3	87.6	98.1	90.2	94.04
TCHHL1	67.2	68.7	40.6	60	77.5	42.3	70.8	43.3	70.1	37.7	57.82
FCGR1A	83.8	85.4	63.1	79.1	87.8	67.7	82.7	66.9	83.4	65.6	76.55
LMBR1	91.6	92.4	92.1	92.8	98.8	93.3	99	94.6	98.7	94.1	94.74
MFSD2A	95.9	98.3	88.1	98.3	95.7	83.5	97.4	86.3	99.3	88.9	93.17
LMF1	88.2	90.2	79.7	89.7	89.8	76.4	89.9	78.2	92.2	79.6	85.39
KLK10	75.3	78.2	54.7	73.7	93.9	66.3	92.1	65.2	91.4	64.9	75.57
GRAMD2A	96.7	95	80.8	97	96.7	84	98.1	81.1	95.7	83.3	90.84
NUMA1	88.7	87.8	77.3	82.5	91.1	78.6	86.8	80.9	89.6	79.1	84.24
VGLL3	93.1	90.9	92.3	90.6	73.1	74.3	73.3	87.5	98.5	87.5	86.11
IL17A	91	94.5	65.2	89	92.9	59.5	91	60.8	92.7	68.1	80.47
SOST	96.2	95.8	90.1	97.2	94.8	88.3	97.2	88.7	97.6	88.2	93.41
SLC9A3	62.4	65.5	55.2	49.6	97.6	85.1	97.8	92.4	98.1	95.7	79.94
CGREF1	88.5	90.6	72.1	76.7	92.3	70.3	83.1	70.7	82.8	69.7	79.68
ARMCX2	100	100	93.1	100	92	98.1	100	98	100	97	97.82
TDRD7	96.2	96.8	83	97.3	96.4	82.6	97.4	83.2	97	85.2	91.51
MRM1	87.3	89.4	78.5	84.7	89.8	78.1	88.7	83	88.7	78.4	84.66
DNAI2	93.8	92.8	90.2	96.2	91.3	89.1	96.5	86.7	92.1	89.7	91.84
MSANTD4	98.1	97.6	96.2	98.1	99.5	96.2	99.1	95.7	98.6	95.3	97.44
CAVIN4	96.4	94.2	80.9	94.7	96.2	82.3	97	81	95.1	82.3	90.01
RBM47	90.9	94.7	93.8	95.4	97.8	94.9	99.2	93.6	97.6	94.4	95.23
MEPCE	92.5	90.6	84.1	90.9	93.4	84.2	92.1	85.4	90.5	87.6	89.13
GATB	90.8	91.9	81.3	92	94.4	83.6	95.6	83.3	95.9	86.7	89.55
POLK	89.1	90	73.7	84.4	91.3	74.6	87.8	74.1	86.6	72.8	82.44
LOC100482856	86.7	86.3	75.3	87.5	88.7	75.3	92.7	78.8	90.2	73.3	83.48
RTKN2	90.7	91.1	70.7	92.5	93.6	71	96.1	70	95.4	72	84.31
SUGP1	98.7	99.7	84.3	97.8	98.7	85.2	97.2	84.7	97.8	84.4	92.85
VIRMA	99.1	99.6	92	99.4	99.2	91.7	99.3	92.1	99.4	91.9	96.37
SOCS5	96.3	95.9	92.4	95.6	98.1	94.8	97.6	94	97.4	93.7	95.58
GLRB	100	100	97.6	96.2	100	97.6	96.2	97.6	96.2	95.4	97.68
ADCY7	88.1	89.3	78.4	86.3	91.1	79.3	91.4	80.6	89.6	78.3	85.24
UBE2F	99.5	100	95.1	100	99.5	94.6	99.5	95.1	100	95.1	97.84
DHRSX	89.1	90.9	56.3	89.7	92.9	56.6	92.1	54.9	93.6	56.8	77.29
PTK7	96.9	97.4	92.4	97.5	97.5	92.7	98.3	92.1	98	93	95.58
ACOT11	95.5	94.3	87.6	97.1	94.3	87.4	97.3	85.7	95.7	88.8	92.37
ACADL	81.9	86	83.7	87.9	87.6	84.1	92.3	83.4	91.2	87.9	86.6
ALKBH4	89.6	98	79.3	95	90	74.7	87.2	78.9	95.7	78.2	86.66
CEP89	76.1	78.1	64.9	79.1	76.3	69.2	87.5	63.2	82.9	59	73.63
PLLP	99.3	98.5	91.2	99.3	98.9	90.1	100	89	98.9	90.1	95.53
ZMYM2	90.8	98.3	95.1	99	91.8	87.6	91	94.3	98.3	95.2	94.14
TASOR2	74.3	81.9	54.3	79.5	78.3	49.1	78.2	54.4	83.4	54.9	68.83
ACTR6	88.4	99.7	98.5	100	88.2	86.9	88.4	98.2	99.7	98.5	94.65
PPP1R26	75.3	81.4	49.9	79.1	73.7	46.8	77.8	47.3	78.5	46.5	65.63
SMCHD1	98.1	98	87	98.4	97.5	86.7	98.7	86.4	98.2	87.2	93.62
LOC100469257	89.9	93.4	81.5	93.3	92.8	85.5	92.7	84.4	94.8	85.2	89.35
AGFG1	77.5	90	75.8	81.6	86.9	82.4	94	71.6	80.9	90.9	83.16
BARHL2	89.8	95.5	92.9	79.7	93.7	91	82.2	96.6	83	81.8	88.62
GLE1	86	86.6	71.5	81.9	83.5	70.8	89.2	80.3	90.1	77.1	81.7
RHOD	91.4	92.8	78.7	92.8	92.5	81.2	94.4	79.4	95.2	81.3	87.97
OLFML1	93.6	93.6	79.1	94.2	95.5	81	95	81.7	95.5	79.2	88.84
STXBP3	93.1	93.7	87.5	93.9	97.8	91.6	98.3	92.2	99.1	93	94.02
RAVER2	94.4	94.1	80.7	86.9	93.8	81.1	89.2	80.4	95.1	72.7	86.84
CHRNA6	92.9	92.7	84.8	93.1	92.1	83.6	94.9	84.2	91.7	82.6	89.26
WWP2	92.1	95.2	95.1	98.6	90.5	89.8	95.9	94.9	98.9	97.9	94.89
PLOD1	96.2	96.3	90.9	96	97.2	92.2	97.1	91.5	97.2	91	94.56
RFX3	96.8	96.9	96	95.9	99.5	98.5	99.6	98.8	99.6	98.3	97.99
LOC100467558	90	93.3	75	92.5	94.2	76.7	95	78.3	97.5	76.7	86.92
GDPD4	82	85.2	62.3	81.7	87	61.2	87.9	63	87.3	62.4	76
CAV2	86.4	88.9	79.6	88.3	95.7	85.8	94.4	85.8	96.3	87.7	88.89
CDC45	92.6	95.3	91.4	91.5	95.9	88.9	88	91	90.7	87.5	91.28
IFI35	76.8	78.6	68.7	78.7	77.2	62.7	81.5	65.4	80.6	65.6	73.58
PNPT1	93.3	93.6	88.2	93.9	96.6	90.2	96.9	90.2	97.7	90.3	93.09
NFATC1	86.6	90.7	75	83.6	91.5	84.6	98.6	78	87.5	80.9	85.7
RTF1	98.6	99	96.2	99.7	98.2	95.4	99.9	96.4	99.4	98.7	98.15
TP53BP1	90.8	91.5	78.3	92.9	94.4	79.2	94.8	79.4	93.9	80.3	87.55
DPH6	95	95.4	89.8	94.9	97.4	90.5	98.1	91.3	98.1	92.3	94.28
MICALL2	58	60	43.3	63.8	66	46.8	68	49	65.2	46.6	56.67
GCK	97	98	95.1	98.5	97.4	94.2	98.8	92.7	99.5	95.4	96.66
NDUFB10	95.5	95.5	82.4	92	100	85.2	96.6	85.2	96.6	83.5	91.25
FOXN1	92.1	92.4	83.5	91.2	89.8	85	91.2	81	95.7	84	88.59
LOC100482859	82.1	83.3	71.8	79.8	86.7	76.1	84.5	75.1	82.8	72.4	79.46
PAFAH2	92.9	91.8	74.2	92.6	92.6	76.5	94.4	74.7	91.6	76.5	85.78
UBE2J2	99	99.5	94.2	99.5	99.2	95	99.5	94.6	100	94.2	97.47
SPSB4	97.8	98.7	96.3	98.9	99.1	97.1	99.5	97	99.5	97.9	98.18
BRD4	98.2	93.1	88.4	95.4	93.9	89	95.4	83.6	95.6	88	92.06
FBLIM1	72.6	87.9	72.9	75.4	77.1	68	67.8	72.3	79.1	68.5	74.16
TMEM205	88.9	89.9	77.8	92.1	87.8	76.7	92.6	76.7	89.9	79.9	85.23
HERC3	99.3	99.2	95	91.7	99.5	95.1	92.4	95.1	91.9	88.3	94.75
NR1D2	99.3	90.4	89.4	99.8	90.2	89.6	99.4	82.5	90.6	90.6	92.18
CCDC154	75.7	75.8	67.5	65	76.6	60.5	72.8	62.1	72.6	58.2	68.68
CKAP2	80.6	81.9	55.2	80	90.1	58.9	90.4	59.3	88.8	58	74.32
SLC9A6	98.7	95	95.1	94.3	93.9	92.3	93.3	91.2	98.6	90.6	94.3
GSTT2B	82.7	81.8	72.4	78.6	89.6	73.6	88.2	73	86.5	70.9	79.73
TBC1D25	94.3	98.5	93.1	97.1	95.7	95.4	93.9	94.2	97.9	93.1	95.32
CDH5	89.8	91.6	73.9	91.2	94.4	74.6	94.9	75.5	96.7	75.5	85.81
RSPO3	98.8	99.4	95.9	98.8	75.4	95.1	98.2	73.9	98.8	94.9	92.92
NAALADL2	91.7	91	74.9	95.8	94.8	76.1	95.8	77	93.9	77	86.8
CDS1	98.7	98.3	94.1	98.1	98.9	94.4	98.9	93.9	98.3	93.7	96.73
TMEM64	95.6	96.7	91.1	96.1	97.3	94.3	97.7	94.5	97.9	94.9	95.61
ARL4C	100	100	100	96	100	100	96	100	96	96	98.4
TAS2R38	87.4	87.4	68.5	87.7	92.2	68.5	91.3	69.7	91.3	67.9	81.19
CD101	69.8	84	66.4	81.3	82.8	24.7	73.6	65.1	86.9	64.4	69.9
OXLD1	66.7	62.9	51.9	69.2	57.6	55.8	73.3	45.9	63.5	52.2	59.9
COPB1	99.9	99.8	98.7	99.8	99.9	98.8	99.9	99	100	99	99.48
C4H2orf81	72.2	72.3	48.6	71.4	79.9	52.8	83.6	50	76.5	52.6	65.99
KCNK3	89.8	98.1	88.3	100	100	84.7	100	96.6	98.7	96.2	95.24
MGAT5	98.8	98.9	96.4	99.7	98.9	96	99.7	96.2	99.7	97.5	98.18
RNF114	96.9	96.5	79.7	96.5	97.8	79.7	97.8	79.3	97.4	78.9	90.05
BRD7	96.1	97.8	89.3	94.7	95.4	88.8	92.9	88.6	94.8	84.7	92.31
ABCC12	93.6	93.1	84.7	93.3	93.6	84.3	94.6	83.7	93.4	84	89.83
NKX2-2	98.9	98.4	95.8	98.4	99.6	96.3	99.6	96	99.3	96	97.83
PROK1	85.3	95.6	80.9	93.2	90.5	78.1	91.7	83.8	94.8	82.3	87.62
TIMM44	90.1	98.9	89	94.1	91.2	81.8	94.5	88.6	94.7	85.2	90.81
TMLHE	95.5	96.7	83.6	95.7	96.9	82.9	96	83.6	96.9	83.8	91.16
ADGRG2	80.2	93.6	79.4	91.9	82	76.9	81.1	79.8	95.3	81	84.12
PRL	93.1	97.8	57.6	93.4	94.8	55.4	91.3	57.6	95.2	59.1	79.53
MAPK7	94.1	91.1	88.8	88.6	87	85.7	91	94.3	88.2	85.4	89.42
REPIN1	96	85.9	75.7	89.2	97.3	86.7	100	72.2	93.2	64	86.02
PSRC1	87	90.1	59.7	93.3	89.3	63.6	97.2	62.3	95.6	75.1	81.32
B3GLCT	92.4	92.8	83.5	92.9	96	85.9	96.9	84.8	96.4	89	91.06
SH2B2	96.5	96.9	78.2	96.6	96.1	88.3	98	88.3	95	89.5	92.34
FBLN2	90.5	91.9	78.8	83.2	92.2	78	86.3	78.3	83.6	64.6	82.74
SLC35A3	99.3	99.7	95.3	99.3	99.7	95.1	100	95.4	93.5	95.1	97.24
ILF3	96.1	98.4	90.6	97.2	97.2	92.8	98.4	91.3	98.5	91.9	95.24
BTBD7	97.7	97.3	93.5	97.3	97	93.1	96.8	93	97.2	93	95.59
MAP3K7CL	96.5	96.4	89.4	95	97.2	90.8	97	89.4	95	90	93.67
LOC100474049	94.4	94	75.1	85	94.2	75.1	85.6	74.8	84.6	68.6	83.14
GKN1	79.5	82.1	63.8	84.8	77.7	62.5	82.7	61.1	85.3	60.9	74.04
ZCCHC4	96.4	96	85.3	94.3	95.3	83.5	95.2	82.9	93.4	81.6	90.39
GORAB	73.3	78.6	71.9	82.8	86.9	68.2	83.3	68.4	86.8	77.4	77.76
SLC24A4	92.9	94.2	91.4	95.7	92.8	90.2	94.5	91.4	96.3	93	93.24
AK7	92.7	93.3	85.2	93.6	92.7	86.2	94.2	88	93	85.8	90.47
DDX41	100	100	99.8	98	99.8	99.7	98.3	99.7	98.1	97.8	99.12
MFSD2B	85.3	90	81.6	90.8	86	78.7	88	81.5	90.9	80.2	85.3
STAC	97	95	83.4	97.7	95.5	82.1	97.7	73	97.7	86.1	90.52
KCNK9	95	97.1	59.2	95.5	93.2	66.2	92	58.2	93.9	56.7	80.7
TNN	89	76.6	75.1	88.3	78.9	75.2	92.6	65.9	77.2	74.2	79.3
RPP30	97.4	98.1	89.9	97.4	99.2	91.7	98.5	91.8	98.5	91.8	95.43
C3H5orf63	91.2	90	82.9	90	93.9	81.1	93	82	90.8	81.1	87.6
KDM3B	98.5	95.8	91.3	97.4	95.6	92.3	98.6	89.7	95	90.3	94.45
GPR82	94	95.2	82.3	94	93.8	80.8	93.8	82	94	81.4	89.13
ESR2	97.7	96.5	86.1	92.8	97.3	86.9	93.3	85.9	93.3	85.1	91.49
GTPBP1	98.4	99.1	97	98.3	99.3	97.5	98.8	97.5	99	97.3	98.22
BPIFB1	75.9	83.5	58.1	83.1	79	53.6	79.4	58.7	84.4	57.9	71.36
SPATS2L	87.1	96.3	86.6	89.8	87.7	79.5	95.2	86.1	90.7	81.6	88.06
OXA1L	90.6	90.4	77.2	91.1	91.7	75.6	94.2	78.1	93.3	76.5	85.87
CEBPZ	88.4	90.2	79.3	88.5	93.6	78.2	93.6	77.6	93.8	78.3	86.15
ACBD4	94.6	92.1	71.8	92.1	95.8	85.1	95.8	71.6	90.6	70.4	85.99
VWA1	84.8	94.2	68.8	84.7	94.9	84.1	95	81.7	93.7	76.6	85.85
CCDC102A	84.5	91.4	84.3	93.3	96.6	87.5	96.9	92.8	95.8	92	91.51
EBI3	84.6	83.2	62.9	83	82.7	63.4	88.2	63.9	84.3	63.2	75.94
PDC	94.7	96.7	90.1	97.6	94.7	87.9	95.1	89.3	96.7	90.5	93.33
KCNJ11	98.7	99.2	97.9	98	97.9	97.4	97.6	97.2	97.3	96.2	97.74
HUNK	92.8	93.3	87.5	92.8	95.8	89.1	96.5	91.1	96.7	89.6	92.52
TP53INP2	69.3	88	74.7	95.9	64.9	75.9	86.2	70.2	100	78	80.31
CAPN13	78.3	81.5	63.4	79.7	82.2	61	80.4	64.8	83.3	63.2	73.78
EIF2B1	95.7	95.1	94.4	97.4	95.1	92.1	99	91.5	97.4	94.8	95.25
PRDX2	97.5	97	90.9	97	99.5	90.9	98.5	90.4	98	90.4	95.01
RPRD2	94.8	97.5	85.8	94.2	95.8	84.8	95.6	85.6	95.4	86.4	91.59
ARHGEF40	89.7	87	79.4	86.9	92	83.5	94.4	83.6	91.6	81.7	86.98
TMEM54	91.9	83.8	80	83.3	86.8	79.2	95.4	71.8	87.4	78.8	83.84
GTPBP8	87.5	88.5	75.8	87.4	90.4	76.6	93.2	74.4	91.6	77.5	84.29
LAMA4	94.6	95.7	89.4	92.1	93.8	87	93.3	88.1	93	86.8	91.38
TUFM	98.1	93.8	95.1	96	93.3	96.5	97.6	91.5	93.2	93.4	94.85
GARNL3	96.9	96.8	89.9	96.9	98	90.4	98.6	90.5	98.1	90.4	94.65
UTP25	92.9	93.6	84.9	93	95.3	86.5	95.8	86.1	95.8	86.2	91.01
COMMD9	96.7	96	89.9	94.5	96.7	89.6	97.8	88.9	89.3	87.4	92.68
LRRTM2	99.8	100	99	100	99.8	98.8	99.8	99	100	99	99.52
QRICH1	99.6	99.4	97.9	99.5	99.7	98.3	99.9	98.6	99.6	98.2	99.07
CWC25	92.9	93.9	76.9	91.3	91.8	79.9	92.9	76.9	92	76.5	86.5
ADGRF2	89.6	88.1	76.1	88.3	92.5	76.3	94.3	76.8	91.9	74.8	84.87
AP4E1	96.1	96.3	79.8	94.9	95.9	79.5	94.8	79.1	94.8	79.1	89.03
CCDC69	87.8	92.6	67	91.3	92.9	64.4	93.5	64.4	94.2	67	81.51
FBXO15	81.8	82.8	51.3	84.8	83.8	52.1	87.2	55.1	85.5	55.8	72.02
SGCB	99	99	93.6	99	99.3	93.3	100	93.6	99.3	93.4	96.95
BICD2	98.1	92.2	88.6	95.4	92	88.8	96.6	82.3	95.4	86.7	91.61
IL1RL2	88.7	90.5	68.2	88.5	76.9	65.8	91.2	67	85.3	67.5	78.96
SRCIN1	84.1	93.8	80.9	90.9	84.8	88.2	84.2	83.7	93.3	86.4	87.03
STARD4	92.6	56.7	82.7	94.2	48.5	82	95.7	50.5	58.7	83.2	74.48
ELP1	92.3	91.4	79.6	94.2	92.7	80.4	94.5	79.7	92.9	80.6	87.83
FZD3	99.8	99.5	98.6	99.3	99.4	98.5	99.3	98.5	99.1	98.9	99.09
CCDC190	76.4	77	52.6	79.7	78.4	52.2	85.7	51.1	79.2	53.6	68.59
INHBC	88.1	92	73.9	89	92.4	74	93.8	76.2	94.3	74.6	84.83
HIP1	92	92.5	83.6	92.3	91.3	82.7	91	82.9	95.6	82.6	88.65
MAB21L3	91.5	90.9	76.1	90.9	92.3	74	95.6	73.2	91.2	73.8	84.95
MAP7	88.7	85.2	76.8	89	87.4	70.8	90.3	73.1	86.5	79.5	82.73
ZNF532	97.5	97.8	81.6	95.9	97.8	81.6	95.9	82.1	96.3	81.7	90.82
TNPO3	96.4	96.4	95.3	95.4	100	98.8	99.3	98.8	99.3	98.8	97.85
TRAF3	91.7	91.5	91.7	90.7	94.9	94.4	94.4	94.4	97.7	92.3	93.37
NCBP3	96.8	95	89	93.9	96	91.4	96.5	92.6	92.8	89.2	93.32
PEG3	67.9	89	55.4	64.9	74.1	47	67.5	55.2	71.1	39.8	63.19
ANKRD22	88.5	89.7	79.6	86.6	95.1	86.4	94.6	86.5	94.6	86.6	88.82
LOC100479163	93.2	94.6	78.7	94.8	95.8	76.6	96.9	81	95.4	78.4	88.54
LY9	66.8	72.7	46.2	71.2	72.9	45.3	77.8	47.1	80.1	53.2	63.33
GALNT18	99.1	97.9	94.9	99.2	98.4	95.8	98.8	94.5	97.6	97.1	97.33
LOC100469042	84.3	100	96.8	80.6	97.9	84.7	87.8	97.9	93	83.6	90.66
FFAR4	95	93.6	84.8	90.7	97	84.2	93.6	84.5	91.8	80.4	89.56
P2RY6	94.9	98	88.1	95.9	96	87.1	96.3	88	97	87.1	92.84
DDX42	99	99	97.3	98.7	99.3	97.9	99	97.6	98.8	97.6	98.42
LOC100471710	89.2	91.8	74.9	87.9	89.3	75.3	90	72.3	91	73.9	83.56
ZNF496	83.2	84.6	62.8	81.1	92	69	87.2	68.7	88	62.9	77.95
CLN6	93.3	93.6	88.1	93.6	94	89.4	96.1	86.2	93.3	87.6	91.52
TEX15	80.1	81.7	49.2	81.3	84.3	49.9	85.7	51.1	84.3	49.1	69.67
ERCC3	99.1	98.3	96.2	99.3	98.2	96.2	99.1	95.5	98.1	96	97.6
RNF43	92.1	92.9	75.7	85.7	94.6	76.6	89.4	76.8	89.3	77.4	85.05
PATJ	91	92	76.3	91.9	90	75.1	92.3	77.6	93	79.7	85.89
GTF3C3	98.3	98.9	94.7	99.1	98.6	93.9	98.8	94.6	99.4	94.7	97.1
VSTM2L	99	99	92.6	71	99	93.1	70.5	92.6	69.9	68.8	85.55
EGR4	91.3	94.2	76.3	93	96.1	75.1	93.2	75.3	97.5	75.5	86.75
GCGR	81.8	80.5	80.9	87.2	65.9	62.1	84.8	73.5	82.7	77.7	77.71
SLC8B1	90.8	92.9	80.6	89.7	94.2	80.8	93.9	84.6	92.2	82.3	88.2
DACT1	76.6	81.8	70.8	90.7	85.2	72.1	92.7	71.5	93.1	80.4	81.49
STC2	85.4	94	82.8	88.1	86.8	76.5	95.7	84.1	88.7	78.1	86.02
CYTIP	94.3	94.4	80.6	94	92.6	79.1	95.3	80.1	93.6	78.9	88.29
HSD17B14	86	87	81.4	89.3	90.8	81.2	92.6	78.8	93	81.4	86.15
CC2D1B	83.9	85.8	77.2	84.9	91.9	77.4	92.6	78	91.4	76.8	83.99
AVPR1A	86.1	87.1	76.1	82.8	96.7	78.9	92.3	79.4	92.3	78	84.97
SGMS1	95.9	97.6	93	96.1	97.1	91.1	98	92.3	96.9	91	94.9
SLC25A37	96.1	97	84.9	92.7	97.9	83.8	95.3	85.2	95.7	87.5	91.61
ZFAT	90.1	91.4	82.6	87.1	93.7	81	93.2	83.1	91.7	78.3	87.22
ZNF652	94.4	97	90.2	88.6	96.6	88.3	81.9	89.5	82.3	86.1	89.49
FAM135A	94.4	95.1	81.2	94.8	95.5	81	95.9	81.6	95.5	81.2	89.62
TMEM87A	98.6	95.5	86.9	87.9	95.9	87.3	88.7	90.7	91.1	81.9	90.45
POLA2	91.8	91.9	80.2	88.3	92.8	78.5	88.8	80.2	90.5	76.7	85.97
SQSTM1	75.5	82.1	73.5	79.9	88.7	84.2	87	78.9	96.9	77.2	82.39
TBCCD1	96.8	96.4	85	96.4	97.1	84.2	98.2	84.6	96.1	84.4	91.92
CWH43	88	91.2	80.6	92.4	89	78	90	81.3	92.8	81	86.43
GABPA	98.5	98.5	95.2	98.5	100	96.7	99.6	96.7	99.6	96.3	97.96
GHRHR	89.8	95.7	75.9	92	90.3	71.6	90.1	75.7	93.1	73.3	84.75
MTHFD1L	96.4	97	88.6	96.5	97.8	90.1	97.8	88.3	97.7	87.8	93.8
KCNIP2	86.7	84.6	90.5	98.2	94.5	90.4	87.7	86.3	84.9	91.9	89.57
SLC39A10	90.8	92.8	92.9	93.6	94.1	82.8	95	83.3	96.4	85.7	90.74
LOC100470802	83.6	87	66.1	88.7	85.8	67.3	89.4	69.5	90.9	69	79.73
FAM3D	86.1	88.4	72.6	86.1	87	71.6	89.2	71.3	85.7	72.1	81.01
MADD	93.6	95.9	93.1	95.1	92.8	88.3	93.3	92.1	96.5	91.3	93.2
SLC45A1	85.3	86	82.8	91.2	88	78.6	89.7	81	88.8	89.6	86.1
ABCC10	90.1	91.7	79.6	89.6	93.4	77.5	91.1	79	90.8	81	86.38
FXR1	100	95.7	93.1	99.7	95.7	93.1	99.7	97.2	95.3	92.6	96.21
OTUD7A	93.8	98.9	93.9	98.4	95.1	92.8	95.2	77.9	99.7	94.2	93.99
SPAG8	82.4	80.4	49.6	87.2	83.9	54.9	90.4	55.5	90	61.3	73.56
LOC100471635	86.1	85.6	80	77.6	93.6	85.2	89.5	89.6	92.6	86.2	86.6
PLPP2	91.9	89.1	90.9	97.4	86.8	88	82.1	83.3	91.6	89.5	89.06
MVD	85.9	87.2	79.6	85.1	92.5	84.4	93.8	84.9	94	85.4	87.28
CRYBB1	98	97.1	93.6	98.5	92.8	93.6	98.5	91.6	96.6	93.1	95.34
DTHD1	91	89.2	70.7	89	91	68.3	92.3	72.4	89.5	71.9	82.53
TRUB2	87.3	93.7	82.2	90.3	91.5	77.9	93.1	80	91.5	79.7	86.72
A4GNT	88.8	89.1	71.2	89.1	92.4	72.4	95.9	71.3	91.8	70.7	83.27
NPHS1	94.4	93.2	82.2	92.7	94.1	84	95.2	82.4	93.4	82.6	89.42
P2RX3	98	98.3	94.4	99.2	98.2	94	98	93.7	98.2	94.2	96.62
GPS1	98.7	99.1	98.7	98.4	98.1	98.9	99.4	98.1	97.9	95.8	98.31
IFFO1	93.7	96.4	91.6	77.8	92.9	88.9	76	90.8	77.3	74.2	85.96
TNFSF8	93.6	92.7	65	97.2	89.3	64.6	94	62.5	92.6	68	81.95
CNOT4	99.4	99.7	96.6	100	99.2	97.2	99.3	96.4	99.8	98.5	98.61
RAPGEF4	93.8	94	91.5	100	99.3	96.5	100	96.4	100	97.8	96.93
SNRNP200	99.4	99.5	99.2	99.5	99.9	99.6	100	99.6	99.9	99.6	99.62
TNFSF9	78.8	75.5	34.7	77.3	84.5	37	82.2	36.4	75	32.7	61.41
SORBS3	89.9	88.2	84.5	84.4	86.2	77	85.9	72.9	81.5	69.6	82.01
TNR	96.2	96.4	92.7	96.6	95.9	91.5	97.1	91.5	96.3	91.8	94.6
WHAMM	80.2	70.6	59.6	82	78.6	57.9	84.7	57	80.3	62.4	71.33
CSRP3	100	99	98.5	99	99	98.5	99	97.4	98.5	97.4	98.63
UBA6	95.9	96.4	90	96.5	96.2	90	96.8	90	96.9	90	93.87
PYCR3	84.5	90.9	81.3	91	88.2	79.7	94.3	83.2	95.3	82	87.04
ST8SIA2	98.9	93.3	97.1	98.8	93.9	97.1	99.4	91.7	99.4	96.8	96.64
PPP1R3F	93.5	89.3	74.1	87.7	87.8	74.5	89.3	72.9	87.3	76.8	83.32
COL7A1	93.9	94.3	80.4	94	94.4	79.8	95.5	80.9	94.6	80.3	88.81
PLEKHA1	99	95	97	98.7	99.3	94.8	98.7	97	98.4	82.3	96.02
ZYG11A	94.7	95.4	73.2	95.8	96.5	74.7	97	73.8	96.4	73.5	87.1
UPB1	91.2	89.6	83.2	91.8	91.6	84.9	96.1	82.6	92.2	86.2	88.94
NUDT12	96.3	96.3	89	96.5	98.1	89.8	98.5	89.8	98.3	89.8	94.24
CLDN8	95.5	95.9	82.4	95	96.9	84.4	96.9	85.3	96.9	82.7	91.19
ABTB1	98	98	91.1	97.1	98.7	93.5	99	93.3	99	93.7	96.14
SIK1	87.3	91.1	78.2	89.5	88.2	73.9	88.3	77.1	89.5	79.9	84.3
KLF1	85.7	87.5	71.4	88.1	90.6	62.9	92.4	64.8	94	65.7	80.31
PTPA	91.3	92.2	86.1	91.9	99.3	97.2	99.7	92.5	99.1	92.9	94.22
KDM5B	94.9	98.4	90.9	97	96.9	90.8	97.2	92.4	99.4	92.7	95.06
MINAR2	88.9	86.3	73.4	80.5	93.2	75.3	86.3	73.7	84.7	65.8	80.81
COIL	76	83.2	63.3	78.4	83.4	62.7	93.9	59.1	84.9	63.8	74.87
RAD50	92.2	97.2	91.2	95.9	91.8	90.3	91.5	90.6	95.7	89.1	92.55
NIPBL	98.9	99.1	96.1	99.1	99.7	96	99.3	96.1	99.3	94.9	97.85
GAPVD1	97.5	97.6	95.8	99.5	99.2	97.3	97.6	97.4	97.8	95.6	97.53
CCL20	84.5	78.4	60.4	82.5	88.5	59.8	90.6	59.8	87.5	61.1	75.31
KLHL33	75.9	73.9	61.4	62.5	91.3	77.4	88.8	73.9	86.7	77.5	76.93
VEGFD	94.6	95.2	76.9	91.8	96	77.2	95.2	77.7	93.8	74.7	87.31
STON2	88.4	89.9	86	95.8	95.7	82.2	95.8	82.5	97.3	88.5	90.21
PHACTR4	86.5	87	81	87.1	85	77.5	89.7	76.4	87	78.3	83.55
EEFSEC	78.5	80.4	73.5	93.6	94.4	86.4	95.1	87.1	93.3	87.4	86.97
RASL11B	90.5	88.5	88.5	90.5	97.2	93.6	98.8	92.4	96	93.2	92.92
IPO9	99.6	99.8	98.3	98.9	99	97.3	98.2	98.2	99.1	98.7	98.71
DUSP1	82.8	83.4	81.2	83.4	99.5	96.2	99.5	96.2	99.5	96.2	91.79
TNP2	88.9	78.3	57.5	86.4	85.1	53.7	88.4	53.7	79.5	NA	74.6111
KCTD21	100	100	99.2	97.3	100	99.2	97.3	99.2	97.3	96.5	98.6
PHKG2	98.3	99	93.3	98	98	93.1	97.6	93.5	97.8	92.9	96.15
STAT3	98	98.3	98.3	98.3	99.7	99.6	99.5	99.9	99.7	99.6	99.09
KAT6B	93.8	94.4	86.8	92	95.6	87.5	94.1	88	93.3	88.8	91.43
LOC100472091	99.8	100	97	99.8	99.8	96.8	100	97	99.8	96.8	98.68
KIF27	83.7	87.2	73.7	91.6	84.3	69.9	84.3	76.6	94	87.2	83.25
SLC26A1	84.4	83.7	74	82.5	87.5	75.1	87.8	77.8	83.9	74.2	81.09
KASH5	74.9	74.1	60.1	78.8	77.1	56	84	54	78.4	63.2	70.06
SMPX	97.7	95.3	87.2	94.5	95.3	87.2	97.3	82.6	95.9	83.6	91.66
SYS1	99.4	98.7	96.8	98.7	99.4	97.4	99.4	96.8	98.7	98.1	98.34
SAMD7	80	91.6	62.4	88.7	79.8	59.1	82.3	60.9	89.6	62.4	75.68
PRIM1	96.6	98	95.2	96.6	95	87.4	95.5	88.3	96.7	88.3	93.76
KLRD1	65.4	65.9	45.1	62.2	70.9	42.6	71.2	46.7	72.4	47.1	58.95
MYLK2	90.5	92.9	87.2	90.1	95	86.4	88.7	86	95.4	87	89.92
ASB15	97.1	93.7	87.5	93.9	92.7	86.8	94.9	89	95.7	89.2	92.05
DCK	95.7	96.8	88.1	96.4	98.1	88.5	99.2	88.8	98.8	89.2	93.96
RNF151	87.2	90.2	71.1	83.1	90.6	70.9	88.3	74.8	87.7	64.6	80.85
EPHX2	87.8	88.8	72.8	85.7	91.9	72.1	92.7	70.9	89.6	72	82.43
DCAF17	98.9	98.9	91.7	98.7	98.9	91.5	98.7	91.7	98.7	91.5	95.92
ADD1	83.1	92.3	83.7	90.3	85.3	85.9	84.2	81.2	95.5	82.4	86.39
GP2	84	86.9	64.8	81.4	88.2	65.5	85.5	65.2	85.7	64.4	77.16
MMP21	86.9	75.6	69.6	88.5	89	79.5	87.9	69	89.2	78.3	81.35
PCSK4	83.6	88.7	83.2	92.9	82.8	83.8	89	82.7	93	83.7	86.34
C12H16orf86	82.9	86.2	49.2	86.7	84.8	51.7	85.2	50.8	85.4	50	71.29
SMC3	99.9	99.8	99.8	99.9	99.9	99.9	100	99.8	99.9	99.9	99.88
PM20D2	94	96.1	86.8	95.4	95.6	83.5	96.8	84.2	96.1	84	91.25
NWD2	98	98.5	94.7	98.3	98.6	94.6	98.5	94.8	98.7	94.6	96.93
ITK	98.4	97.7	92.7	97.6	97.9	93.5	98	92.8	97.5	94.4	96.05
WIPF2	93.6	93.9	84.3	92.7	98.6	84.1	97	84.3	97.5	85.2	91.12
IPP	98.9	99.1	95.7	99.5	99.1	92.6	99.1	95.2	99.3	95.5	97.4
TBCK	98.6	98.7	95.1	98.1	98.8	94.6	98.7	94.8	98.7	96	97.21
DRP2	94.5	94.1	93	93.2	98	94.8	97.5	95	96.9	93.7	95.07
CREB5	92.7	96.6	93.9	100	92	94.2	92.7	95	94.9	92.3	94.43
TGFB2	93	99.5	95.9	99.6	93	89.6	99.3	95.7	99.6	97.1	96.23
MFSD1	95.9	94.4	84.9	95.1	96.8	85.7	97.2	84.6	95.9	85.5	91.6
LARS2	86.4	93	84.9	90.1	88.7	78.9	88	84.6	94	81.8	87.04
SLC44A5	81.6	85	60.9	80.8	92.1	68.4	96.6	67.9	93.5	67.5	79.43
WDR74	94	93.8	87.5	94	94.8	89.9	96.9	86.7	93.8	90.1	92.15
MOGAT2	90.4	88.9	83.2	88.6	90.1	84.4	92.8	82	88.9	82.3	87.16
GALNT12	90.9	93.3	74	93.1	85.4	81.6	91.4	80.1	91.7	79.5	86.1
ATAD1	100	100	100	100	100	100	100	100	100	100	100
UROC1	90.6	90.3	84.6	75.6	91.8	86.9	79.2	84.3	76	77.1	83.64
JCAD	73.7	74.9	49.5	69.8	74.5	48.5	76.5	48.2	72.8	47.1	63.55
TAF1D	82.3	86.4	64.3	89.1	87.4	67.4	90.8	68.4	89.8	63.9	78.98
CCDC180	79.1	78.2	58.4	81.6	84.4	64.1	85.1	64.3	85.5	65.3	74.6
LGI4	91.8	92.9	88.3	88.1	97.2	84.2	82.5	84.4	82	80.7	87.21
LRRC8B	97.3	97.1	93.8	97.1	98.3	94	99.4	94	98.1	93.8	96.29
SQOR	95.1	97.6	87.8	95.8	96.4	86.2	96.9	88	97.1	87.1	92.8
XPO5	86.4	97.8	88	96.3	86.5	77.4	85.7	88	97.6	88.3	89.2
RETREG3	96.4	95.7	92.3	96.6	96.4	91.8	97.4	90.6	96.2	91	94.44
ATF1	85.6	98.5	75.8	98.5	87.9	93.7	97.8	79.4	98.9	95.5	91.16
MUC19	88.2	89	72.5	88.6	83.1	73.5	93.4	73.5	83.1	73.4	81.83
TMC1	98.6	74.2	97.4	98.9	74.3	96.9	99.1	73	73.9	96.9	88.32
LOC100477744	98.8	98.2	91.7	97.8	98.6	92	98.4	91.8	97.4	90.9	95.56
ITFG1	98	97.4	89.9	93.2	98.8	90.8	98.6	90.1	100	89.2	94.6
TAGLN3	99	98.5	98.5	99.5	98.5	98.5	99.5	99.5	99	99	98.95
MLXIPL	88.1	88.7	76.1	83.4	89.5	74	79.3	74.8	82.8	74.3	81.1
MUC1	73.5	78.1	66.8	68.9	53.8	62.5	67.9	65.6	67.9	57.4	66.24
PROSER3	83.5	88.5	55	82.5	65	49.8	38.3	53.9	56.5	36.9	60.99
IL15RA	34.9	37.7	64.6	89.2	73.4	42.8	86	68.1	88.9	71.3	65.69
MILR1	76.2	78.5	30.4	75.8	85.1	30	83.5	30.7	83.2	30.3	60.37
ATMIN	92.8	93.7	78.1	90.9	95.4	78.3	94.5	80.2	93.7	77.9	87.55
APLF	78.9	81.7	54	81.7	87.9	58.3	89.5	60.4	92	59.2	74.36
ARHGAP44	91.7	85.3	89.8	85.8	89.9	88.7	85.2	81.5	83.3	80.1	86.13
GMCL1	100	80.3	96.6	99.1	78.5	92.1	97.6	78.1	82.7	93.1	89.81
ETHE1	98.4	98.4	90.6	97.2	97.6	91.3	97.2	91.7	98	90.9	95.13
TVP23B	80	78.4	75.6	73.1	90.7	93.7	97.9	86.1	89.5	92.2	85.72
ETV4	89.4	87.6	83.4	87.5	96	89.9	96.1	90.7	96.9	91.2	90.87
GRIN2C	87.3	97.6	87.3	96.5	97.3	81.3	96.8	94.8	95.7	92.7	92.73
LIMK2	97.3	97.8	90.8	96.7	99.1	90.4	98.4	90.9	98.4	89.7	94.95
IL17RD	90.9	94.3	80.3	94.3	92.9	80.9	93.6	84.2	95.7	81.9	88.9
OIT3	96.2	97.3	88.6	93.9	97.1	88	94.7	89	96.4	86.2	92.74
CDC25C	82	81.3	59.3	89.5	79	56.5	91.4	61.7	92.7	64.6	75.8
FTO	91	96.5	84.9	95.5	94	80.5	94.7	83.2	94.7	82.9	89.79
MRPL54	55.7	81.9	66.4	89.9	64.8	48.5	62.7	70.8	89.1	68.6	69.84
BCL2	78.3	85	81.4	100	80.6	68.2	100	74.7	100	100	86.82
SETD1B	88.2	91.6	84.5	79.7	86.1	83.1	83.2	82.7	81.6	72.8	83.35
RAB20	86.6	74.4	83	84.7	71.1	81.7	84.3	67.6	75.8	77.7	78.69
LY86	90.7	88	66.7	84	89.8	77.8	89.1	79.5	91.3	75.6	83.25
ABHD4	99.3	99.2	94.9	98.3	99	97.3	98.3	94.6	98	94.1	97.3
VPS53	99.3	98.4	96.5	92	98.6	97.1	92.4	96.3	91.2	89.9	95.17
TINAGL1	95.1	96.8	89.3	98.1	94.1	85.9	95.5	88.2	96.6	88.7	92.83
DDX6	100	100	93.6	100	100	93.6	100	93.6	100	93.6	97.44
PCID2	95.2	95.7	95.1	93.9	97.4	96.6	97.8	97.2	97.2	96.2	96.23
FAM20B	99.3	98.5	97.6	98.8	98.8	96.8	99.3	96.3	99	96.3	98.07
MRPL3	95.2	95.4	85.9	95.8	94	84.7	89.9	84.4	88	79.7	89.3
GRWD1	90.4	93.1	91	84.4	93.3	90.4	88.5	92.6	88.3	85.9	89.79
LOC100465952	94.2	93.6	79.1	95.7	94.2	80.2	98.2	80.2	93.9	83.5	89.28
VAV1	98.6	98.7	91.5	96	98.9	90.9	96.4	91	96.4	88.5	94.69
LPCAT1	88.9	93.4	81.1	89.9	90.1	82	89.1	84.4	92.8	82.1	87.38
VPS37B	91.7	86.5	82	73.3	93.4	84.3	93.2	81.2	81.9	70.5	83.8
SYT12	96.4	96.9	94.5	96.9	96.7	94.1	97.6	94.5	97.1	94.8	95.95
POLDIP3	95.2	94.8	91	94.5	93.8	90	95.7	90.3	94.3	90	92.96
SPP2	82.3	74.2	64.9	86.5	77.8	64.1	72.7	66.5	86.4	72.3	74.77
RNF169	81.6	79.8	72.3	84.7	85.6	72.3	93.1	66.5	85.7	70.7	79.23
ZNHIT6	85	82.3	62.9	81.5	92.2	65.5	91.9	66	89.9	79.8	79.7
DPP8	99.4	99.8	96	99.4	99.7	95.9	99.3	96	99.7	95.7	98.09
NEK10	97.3	97	83.9	94.3	97.3	83.8	96.1	83.4	94.3	70	89.74
AAAS	89.4	89.2	83.2	88.7	98.5	91	97.1	90.3	96.9	89.5	91.38
FCER2	88.1	69.3	66.4	87.5	70.9	64.3	94	51.7	71.6	64.8	72.86
MBNL2	88.7	98.9	96.8	93.9	89.9	88.4	85.3	97.1	94.8	93.3	92.71
SHBG	81	81.5	61.1	52.6	83.9	61.5	54.4	60.4	56	39.2	63.16
NME7	95.4	98.2	89.6	95.6	94.8	86.1	93.4	87.6	95.6	88.9	92.52
PLA2G12B	94.4	94.4	88.2	90.8	96.9	90.8	94.4	89.7	93.8	87.7	92.11
ST8SIA6	94.9	95.1	73.9	96.8	96.7	79.6	98.8	78	97.6	83.4	89.48
FBXO39	85.8	91.4	89.2	86.2	85.3	80.6	86.5	86	86.2	82.2	85.94
CLDN16	95.9	88.7	85.1	88.9	88.6	85.5	90.6	93.2	96.6	92.8	90.59
ELOVL5	93	98.7	91.3	92	93	90.6	92.6	90	92	90	92.32
ARHGEF2	84.7	92.2	79.4	89	83.8	78	95.5	84.8	91.5	78.3	85.72
CEP97	92.9	93.4	75.9	92.8	93.7	75.5	94.5	75.9	94.5	75.8	86.49
SSTR3	90.8	94.6	82.5	91.5	91.3	82.1	93.6	81.8	91.5	83.3	88.3
FCGRT	90.1	91	66.9	89	92.8	66.3	92	65.9	92.4	66	81.24
CDCA3	90.3	89.6	68.7	78	91.4	70.6	81.7	69.5	82.1	60.7	78.26
BDH1	90.8	91.7	88.3	90.8	95.6	85.4	97.4	86.3	96.2	86	90.85
SHC4	92.3	87.9	75.8	95.6	90.9	78.3	97	74.1	88.1	78.9	85.89
CTCFL	77.4	80.2	36.7	89.9	81.4	34.7	86.1	36.7	74.4	48.8	64.63
PIGC	96.3	97	94.3	97.3	97.3	93.6	98	93.6	98.3	93.9	95.96
AHI1	85.4	93.8	76.7	90.3	85.8	74.3	89.2	76.3	91.1	78.1	84.1
TMEM161B	98.9	98.2	95.3	98.9	99	96.1	99.4	95.7	98.7	95.8	97.6
GEMIN4	93.1	94.1	85.5	96.2	94.8	85.5	96.8	85.5	98.1	89.2	91.88
BLNK	92.3	84.6	73.1	93.4	85.3	73.1	96.1	73	86.5	73.3	83.07
HELB	79.4	79.5	62.4	79.7	87.7	63.8	89.7	63.2	87.6	66.3	75.93
NEDD9	89.1	91	78.8	84.2	87.5	79.7	81.1	82.1	79.8	71.1	82.44
LINGO2	99.2	99.5	97.7	94.4	99.3	97.9	94.5	97.9	94.7	93.3	96.84
ADARB2	88.6	90.3	80.6	88.3	94.1	83.2	90.4	85	91.6	81.2	87.33
CAMP	72.3	74.1	48.3	76.5	74.8	49.7	72.7	43.8	74.1	46.3	63.26
DNASE1L1	89.8	91.9	72.1	84.6	91	70.6	87.4	72.7	83.4	69.5	81.3
FAM53B	88.2	97.9	76.5	91.4	86.4	74.9	87.3	74.9	91	81.2	84.97
RBM33	87.1	94.3	83	86.1	83.2	76	80.7	80.9	89.2	70.7	83.12
CEP20	89.7	93.1	73.7	93.3	92.5	75.4	95.3	75.4	94	84.2	86.66
ATP1B3	91.8	90.2	72.7	91.9	91.8	72.1	95.5	72.1	91.5	69.1	83.87
ZNF202	95.5	95.3	75.9	95.8	94.8	75.7	96.5	76.3	95.3	75.9	87.7
DNAJC30	78.3	82.3	58.7	84.5	85.4	65.8	88.9	64.4	91.6	66.2	76.61
MEDAG	95.3	96.3	87.7	95.2	97.7	88.1	98	88.9	96.8	88.4	93.24
JMJD6	97.9	99	97.4	91.3	96.9	95.3	91.3	97	91.6	89.4	94.71
KCTD3	97.7	98.1	92.9	96.5	97.9	93.2	97.2	93.1	96.8	93.2	95.66
SCRN1	97	98.6	90.1	97.6	97.3	87.4	97.7	89.4	98.1	88.4	94.16
TEKT5	81.1	81.7	71.1	80.7	94	83.4	94.5	81.2	93	83	84.37
MTMR4	80.2	82.1	77.3	83.5	90.5	85.4	93.7	91.2	94.5	88.5	86.69
TAF13	99.2	99.2	99.2	99.2	100	100	100	100	100	100	99.68
CAVIN1	98.2	98.5	91.1	98.7	99	91.3	99.2	91.1	99.7	91.3	95.81
PFN4	96.1	96.1	89.9	96.9	94.6	88.4	97.7	90.7	96.1	89.1	93.56
AGBL5	92.7	92.3	85.7	92.4	91	84.8	93.8	86.4	90.4	83.9	89.34
MGAT4C	98.5	98.5	92.9	98.8	98.8	92.9	99.6	92.5	99	92.5	96.4
PADI6	84.8	87.1	65.8	84.5	86.3	65.5	89.2	65.7	85.7	65.3	77.99
PKD2L2	93.3	81.4	80.6	91.7	83.8	80	95.8	69.1	82.9	78.6	83.72
PLPPR1	98.2	99.4	96.6	98.1	98.2	96.3	97.7	96.6	97.7	95.1	97.39
HCRT	97.4	96.9	79.2	95.4	97.4	84.4	96.1	78.6	96.9	77.1	89.94
RIT1	97.6	97.7	93.2	95.9	97.6	94.6	98.2	93.6	95.9	92.2	95.65
SMPDL3A	87.4	86.8	77.6	89.2	92	78.5	95.2	78.5	92.3	79.6	85.71
DDO	76.4	75.5	69	75.8	92	75.7	93.3	76.8	92.7	75.7	80.29
NISCH	88.6	92.1	83.7	87.8	95.2	84.7	89.4	86.3	91.5	84.1	88.34
FGF8	99.5	100	98.4	99	93.2	78.5	95.5	80.2	91.5	76.6	91.24
LDOC1	100	100	77.1	100	100	77.1	100	77.1	100	77.1	90.84
ERCC8	93.1	92.1	86.4	94.1	96	89.7	98.7	88.8	97	90.2	92.61
HINFP	94.6	96.7	82.3	95.5	94.7	82.8	95.2	82.9	95.3	82.2	90.22
SHISAL2B	86.3	87.6	73.7	86.3	95	78.8	94.4	80.8	96.9	80.1	85.99
TERB2	90.5	91.9	74.5	90.5	93.7	75	92.8	75	93.2	72.3	84.94
SPRED1	98.1	98.4	91.9	98.2	99.3	92.6	99.5	92.8	99.8	92.9	96.35
GGH	82.4	83.6	64.8	81.8	91.5	68.3	92.8	67.9	90.9	69.6	79.36
FBXO43	85.4	84.6	63	88.9	88	62.8	89.1	60.9	88	62.6	77.33
B4GALT1	93.3	94.2	83.2	94.5	94.8	82.7	96.1	84.2	96	83	90.2
TPR	91.7	95.6	83.9	96.4	92.6	81.3	92.9	80.2	93.8	83.1	89.15
GADD45GIP1	94	90.7	66.7	95.6	89.1	66.8	96.7	62.8	90.6	66.3	81.93
HDAC10	85.7	86.5	71.8	83.1	89.4	71	87.3	72.6	88.2	70.1	80.57
TMC6	72.3	83.8	72.5	85.6	75.9	64.1	87.6	74.1	87.8	74	77.77
CMTM6	83.5	82.4	73.6	82.3	89.1	78.1	88.5	76	88.5	75.4	81.74
FLAD1	92.7	93.1	87.4	92.9	92.7	85.7	94.9	85.9	93.3	86.6	90.52
LOC100467394	96.8	95.7	95.9	96.9	96.6	95.4	97.1	94.1	95.6	95.5	95.96
ETV3L	82.1	58.6	59.3	78.5	58.2	71.6	88.4	42.7	61.1	59.9	66.04
FOXF1	97.8	96.6	91.4	98.3	97.8	91.3	99.1	92.5	98.9	92	95.57
PRRT1B	84.8	89.1	82.5	91.1	80.4	78.8	86.3	75	84.6	88.7	84.13
POLR2I	100	100	100	100	100	100	100	100	100	100	100
TTC16	78.1	79.8	58.6	78.7	85.8	63.9	86.9	63.1	87.7	61.8	74.44
TGFBR2	98.9	98.7	91.8	99.1	98.7	93.9	99.3	91.2	98.9	92.5	96.3
PRAG1	81.6	85.9	70.1	85.4	85.6	68.8	86.7	73	88	71.5	79.66
CD44	74.6	79.7	61.4	74.5	78.3	60.6	73	65.9	80.5	64	71.25
NOP2	84.9	86.8	69.3	86.7	90.5	70	92.3	71.4	92.9	73.3	81.81
ELK1	97.2	96.9	82.5	96.3	97.7	82.8	96.8	81.8	96.7	81	90.97
TTLL3	84.2	77.1	71.7	88.7	80.5	76.7	91.5	65.9	80.9	80.7	79.79
CLN8	88.5	93.8	84.6	85.4	89.2	81.1	90.6	85	86.1	78.3	86.26
SLC44A3	87	86.6	75.6	90.1	86.2	76.1	93.1	75.6	88	77.3	83.56
FHL3	97.9	99.3	94.5	95.8	98.6	93.8	95.8	94.5	96.5	95.2	96.19
VWC2	92.6	98	86	93.4	85.4	92	98.1	83.2	81.2	90.1	90
USP45	80.6	79.2	70.2	79.2	88.5	71.9	87.9	73.2	89.5	73.7	79.39
NUDT5	99.2	99.2	86.8	100	99.1	82.2	98.6	82.6	98.2	81.3	92.72
TESK1	89.6	96.9	86.2	93.8	98.2	87.5	98.8	88.5	98.6	88.3	92.64
ADD2	88.3	95.5	89.5	90.9	94.6	90.2	94.3	93.5	95.7	91	92.35
PAFAH1B3	97.8	97.5	96.9	98.7	97.4	95.2	97.4	95.2	99.1	95.7	97.09
LLPH	91.2	96.9	75.7	89.6	90.4	68.3	84.1	79.6	88.1	71.2	83.51
TSPAN14	99.6	100	98.1	100	99.6	97.8	99.6	97.9	100	98.1	99.07
CNPY4	89.8	91.1	86.4	92.1	88.7	81.2	90.6	92.1	87.9	88.7	88.86
HNF4A	99.8	92.4	97	99.8	96.9	96.8	99.5	93.6	96	96.6	96.84
LOC100475597	97.8	98.4	94	89.1	98.1	94.2	89.1	93.1	88.8	86.2	92.88
USP4	96.9	95.3	89.5	94.8	97.3	90.6	96.6	90.8	96.4	90	93.82
HGFAC	85.1	80	75	83.3	92.9	74	80.9	83.7	82.8	70.6	80.83
MBP	84.7	92	71.9	87.6	86.9	68.2	81.6	64	86.5	74.1	79.75
SVOP	99	99	96.1	99.5	99.1	95.6	99.5	95.3	99.3	95.4	97.78
UBN1	97.6	93.8	81.6	95.8	93.6	81.3	96	78.5	92.1	79.4	88.97
KDM2B	98.9	99.5	91.4	96.4	98.8	90.8	95.5	91.2	96.4	89	94.79
LOC100481638	95.4	95.4	87.7	95.9	96.6	85.9	96.3	86.1	96.3	86	92.16
CDS2	97.1	86.9	95.1	98.8	85.7	94.8	98.4	84.3	87	96.2	92.43
GC	93.5	94.6	75.2	92.2	92.8	75.7	94.7	76.2	93	75.9	86.38
ZNF341	98.5	89.8	91	98.9	88.8	90.7	98.2	83.5	98.2	90.8	92.84
BTBD16	89.4	89.7	71.9	87.8	90.4	72.7	91.3	72.3	89.8	71.5	82.68
LOC100466967	92.5	90.4	80.5	86.9	90.6	81.1	88.8	77.7	89.7	74.8	85.3
PHF1	89.8	90.1	78.6	90.9	98.8	80.9	94	81.5	93.8	84.6	88.3
SLC46A1	91.7	91.9	88	92.8	92.8	87.1	95.6	86.5	94.1	88.7	90.92
SLC17A4	59.6	61.7	53.8	58.7	78	64	82.6	64.2	79.7	65.1	66.74
ELF4	90.4	92.9	69.4	89.6	91.5	71.1	93.9	69.2	90.2	70.4	82.86
LRRC36	94.3	92.7	82.5	94.7	92.7	82.1	95.2	79.6	93.2	81.6	88.86
USP43	81.5	78.4	73.3	82.3	83.3	71.8	86.7	70.6	85.6	72.6	78.61
EREG	80.9	92.9	77.5	80.8	84.7	78.6	91.8	76.5	83.7	75.9	82.33
DFFA	85.4	85.8	78.7	86.8	92.2	79.3	91.8	80.4	94.6	80.1	85.51
NPLOC4	98.7	99	98	97.7	98.1	96.5	97.8	97.9	98.5	96.7	97.89
STK16	84.9	86	80.3	95.7	98	91.8	84.9	92.8	86.1	80.4	88.09
SYK	97.4	92.8	86	92.5	99.5	95.3	99.5	88.8	97.8	89.1	93.87
MRPL38	94.2	95	87.9	92.4	95.3	88.9	95.5	87.6	92.9	88.2	91.79
ZNF169	69.1	70.8	52.2	44.5	82.5	39.4	88.9	38.4	90.3	32.4	60.85
SKAP1	92.8	91.7	79.6	94.7	92	78.8	93.6	76.9	93.2	81.1	87.44
FAM83D	89.2	87	74.4	87.9	91.5	76.1	93	75.3	90.1	75.1	83.96
SPAG1	71.1	68.5	64.9	80.4	82.4	64.8	86.2	62.4	88.6	73.5	74.28
POPDC2	82.1	87.6	77.1	86.6	87.9	71.1	89.9	77.4	91.5	75.2	82.64
NIF3L1	89.1	93.4	82	91	90.7	78.4	88.9	82.2	94.1	79.9	86.97
BAZ1A	96.6	95.2	86.7	92.6	95.7	86.3	93.6	86.9	94.2	82.2	91
SCN1B	98.6	98.6	98.5	99.5	98.6	99	100	94.5	100	98.1	98.54
ALCAM	98.5	98.1	93.5	98.7	98.3	93.1	98.5	93.1	98.3	93.7	96.38
LOC117799042	90.3	92.4	76.4	91.2	92.9	75.3	92.4	77.9	91.3	77.1	85.72
LZTS1	96.2	95.2	86.6	94.1	97	87.1	96.7	88.1	95	88	92.4
TAF8	100	99.7	94.2	99.4	100	95	100	94.2	99.4	94.2	97.61
NFRKB	88.5	96.3	84.6	97.5	92.4	86	89	84.4	96.2	84.3	89.92
NELFB	96.6	97.9	91.1	98.9	95.8	92.4	97.1	94.3	98	94.6	95.67
SIN3A	99.4	99.7	97.4	99.4	99.6	97	99.3	97.3	99.5	97.4	98.6
HNMT	95.9	96.7	84.6	96.2	97.6	85.3	97.6	84.6	98.8	85.7	92.3
SLC35F3	92.9	96.7	91.5	97.2	92.4	86.8	98.6	92.7	99.1	93.8	94.17
AGBL1	89.1	87.1	77.1	85	88.8	76.9	89	75.2	88.6	69.1	82.59
BUB3	95.3	95.3	95.3	95.3	100	100	100	100	100	100	98.12
IL10RA	73.6	76.7	52.3	70.7	84.9	52.5	85.9	54.7	84.3	53.2	68.88
LNPEP	95.1	95.9	83.5	95.8	96.7	83.2	97.1	84.2	97.5	84.4	91.34
KIN	93.5	97.1	89.9	94.5	95.7	89.8	96.7	91.8	96.7	89	93.47
CABLES1	92.5	92	82.8	99.4	96.1	86.8	98.6	87.7	98.3	95.7	92.99
PGGHG	79.8	84.5	72.9	84.7	86.1	77.8	84.9	76.8	88.4	75	81.09
OPRM1	98.5	98.5	93.6	99.7	98	91.6	99.7	91.6	99.7	97.9	96.88
MRPS27	91.5	91.8	79	89.6	92	77.6	85.4	76.1	87.5	77.5	84.8
TMEM61	77.1	80.8	48.6	77.2	85.6	48.6	84.9	48.6	83	45.5	67.99
TMEM255B	68.4	66.7	64.5	61.8	79.8	67.7	73.7	78.9	83.5	68.5	71.35
C11H4orf48	55.1	58.8	46.1	96	NA	NA	NA	88.1	98.3	96.6	77
CCM2	95.9	91.3	89.1	90.9	96.9	89.8	95.9	89.4	95.7	89	92.39
DOK3	86.4	89.7	76.1	88.8	92.2	76.6	92.8	77	93.3	76.3	84.92
RITA1	83.8	81.6	60.1	82	83.8	61.6	87.8	68.6	83.1	63.6	75.6
CCL26	61	89.1	50.6	81.7	63.4	37.1	59.3	52.9	84.8	54.8	63.47
F2R	87.7	91.2	77.7	89.7	89.7	77.9	90.7	79	89.6	79	85.22
ZNF787	89.8	65.3	82.7	100	73.1	90.9	83.9	68.1	83.9	83.9	82.16
VIT	91.2	91.3	81.2	90.3	93.5	78.7	91	79.7	89.6	77.5	86.4
CGAS	67.2	72.2	52.5	68.7	76.6	70.8	72	55.6	74.5	59.8	66.99
CASK	98.3	99.1	99.1	93.7	97.7	98.9	94.6	98.5	93.7	94.6	96.82
C3AR1	77.5	84.5	62.1	59	83.5	62.4	63.1	64.2	63.9	49.3	66.95
DDX11	91.2	90.5	78.2	92	92.3	77.1	94.9	75.4	93.1	77	86.17
LDLRAD1	89.1	88.3	61.5	87.6	83.3	71.5	82.8	72.4	90.2	72.9	79.96
CLDN20	92.2	93.2	75.3	94.1	93.6	76.3	93.2	79.5	95.9	78.5	87.18
KLRB1	77.7	79.4	49.8	77.1	81.8	51.6	84.4	47.5	81.3	52.1	68.27
COPS5	86.6	99.7	99.7	99.7	86.3	86.3	86.3	99.4	100	99.4	94.34
CLEC14A	84.9	90.6	64.3	85.5	89	67	88.3	66.7	90.4	68.1	79.48
CNTFR	96.8	96	94.4	96	95.2	92.7	98	92.2	96.2	92.5	95
LRRN4	57.2	63.9	41.4	58.5	73	55.9	78.8	48.7	80.1	56.9	61.44
SRRT	95.7	96.6	95.7	97.5	96.2	96.7	97.8	96.4	98	97.3	96.79
WNT11	99.7	99.7	97.2	99.4	99.4	96.9	99.7	97.2	99.7	96.9	98.58
LOC100478010	59.1	60.6	47.4	59.6	78.3	51.7	82.8	54.3	79	53.4	62.62
SUFU	99.8	99.6	97.3	99.4	99.4	97.1	99.7	97.7	99.7	97.1	98.68
ZC2HC1C	84.6	87.7	56.7	85.2	86.9	58.5	87.5	62.8	89.8	60.7	76.04
NGB	84.7	86	76	81.8	97.4	87.1	92.9	87.7	92.9	85.8	87.23
VARS1	92.9	92.9	89.9	92	97.2	93.5	97.6	93.7	96.9	92.9	93.95
LOC100482046	82	91.1	63.7	85.7	82.9	63.7	86.5	64.6	87.5	63.7	77.14
OGG1	93	94.5	83.4	91.5	95	83	93.8	86.7	95.8	82.5	89.92
KCNG4	92.1	93.1	74.8	87.8	92.6	74.2	90.9	74.4	88.2	71.2	83.93
COPRS	93.9	79.2	81.5	93.9	92.1	78.3	97.4	78.4	91.3	80.4	86.64
ZCWPW2	83.5	81.1	62.7	92.5	86.6	65.9	90.9	66.6	94.1	69.9	79.38
MIGA2	95.8	95.9	91.9	94.9	96.8	93.1	97.3	93.1	95.9	92.1	94.68
ATL3	97.2	98	92.2	97.4	97.6	91.5	98	92.6	98.2	92.1	95.48
MTF2	99.5	99.8	97.5	99.7	99.7	97.3	99.5	97.6	99.8	97.5	98.79
LOC100464876	92.9	95.6	71.2	94.7	93.8	76.6	98.2	73	95.6	75.7	86.73
CC2D1A	95.4	94.2	81.8	95	94.3	80.7	97	80.5	95	81.9	89.58
RPRD1A	100	100	98.7	100	100	98.7	100	98.7	100	98.9	99.5
TNFRSF1B	69.2	80.4	51	79.9	77.7	55.8	80	54.1	82.4	56.8	68.73
MDFIC	82.4	81	58.3	88.3	93.8	78.5	97.8	62.5	97.8	77.2	81.76
OPN5	98.9	97.7	91.5	98	98.6	95.5	98.9	94.6	98	94.9	96.66
SCYL3	85.9	89.9	79.3	88.7	86.4	75.9	88.2	77.9	88.9	76.7	83.78
MEAF6	100	100	100	99.1	93	99.2	100	99.2	100	90.1	98.06
GPR63	98.1	97.6	92.5	98.6	97.6	92	98.6	91.3	97.6	92.3	95.62
SPATA18	70.8	84.6	67	80.9	68.8	54.4	73.6	70.5	88	66.7	72.53
PINLYP	91.3	93.7	81	92.7	93.9	82.8	94.3	84.3	95.3	83.8	89.31
MPZL1	78	89.3	71.7	88.6	82.1	75.5	85.2	73.3	95.4	72.5	81.16
BTG2	92	76.7	94.8	90.7	97.5	96.8	96	96.8	94.7	92.7	92.87
LAYN	78.2	91.1	76.1	70.2	83.9	79.7	84.3	79.7	72.6	73.9	78.97
GFM2	89.9	93.7	82.6	93.2	89.8	80.6	90.2	82.9	93.6	82.5	87.9
TMEM209	90.1	100	94.9	99.6	90.4	86.2	90.2	95	99.6	94.6	94.06
SLC35F2	92.4	95.3	92.1	93	93.6	91.2	91.7	93.8	92.7	90.9	92.67
C17H17orf49	98.7	98.4	97.1	90.4	78	85.3	75.1	82.2	96.7	78.9	88.08
LHFPL5	90.3	100	99.1	100	99.5	98.6	99.5	98.6	100	98.6	98.42
LVRN	86.8	89.9	66.5	89.1	87.2	68.1	86.7	66.2	89.7	65.8	79.6
C17H9orf64	91.5	91.5	75.4	90.9	96.2	76.8	95	76.6	96.2	76.2	86.63
PRPF31	100	100	99.2	99.8	100	99.2	99.8	99.2	99.8	99	99.6
REEP4	94.1	97.5	79.4	91.8	95.3	77.6	96.5	78.9	95.7	78.2	88.5
SNAPC3	92.4	95.4	84.5	96.6	94.2	84.5	95.6	84.7	97.8	85.2	91.09
ESYT1	72.8	73.5	68.7	72.4	95.5	86.4	95.2	86.9	95.2	86.4	83.3
LOC100475338	96	97.9	93.7	97	95.8	94.8	94.3	93.6	96.7	92.6	95.24
PNPLA3	79.2	80.7	63	77.9	80.8	60.1	80.6	62.4	81.2	57.1	72.3
CCDC110	88.7	89.8	62.6	88	92.4	59.7	93	64.8	92.3	63.8	79.51
PRDM14	95.5	91	62.1	89	97.2	77.7	97.2	62.9	95.6	63.9	83.21
NBN	80.8	82	64.7	81.4	85.1	66	88.9	70.8	86.6	65.6	77.19
A4GALT	88.9	91.6	78.9	89	90.9	77.3	89.8	79.2	90.1	78.1	85.38
BPI	71.7	76.5	51.1	70.9	85.1	53	78.2	53.6	77.1	50.4	66.76
C11H4orf17	84.8	85.1	57.8	83.1	88.8	56.6	89.3	55.4	87.5	55	74.34
ETFBKMT	92.9	93.6	82.1	93.6	94.7	81.3	96.6	77.4	95.9	78.6	88.67
ECSIT	88.9	91.9	75.3	89.3	89.2	74.4	87.8	76.1	90.1	75.6	83.86
IRF6	99.4	99.4	94.6	97.9	99.4	95.1	98.5	94.6	97.9	93.6	97.04
LDB3	81.6	79.9	75.5	76.8	91.8	83.1	87.6	87.2	90.6	84.6	83.87
SP1	87.5	98.8	85.1	98.1	87	73.9	99.1	87.4	99.3	84.3	90.05
ERCC4	92.8	92.2	83.3	89.6	96.4	83.2	95.3	83.5	93.9	82.3	89.25
TNFSF10	82.9	88.9	62.3	84.3	87.1	61.4	90.2	64	90.2	61.5	77.28
SLC26A11	91.3	88.7	82.5	92.9	86	80.5	90.4	76.9	87.8	82.5	85.95
DNASE2B	92.7	89.7	64.7	91.1	93.3	64.6	95.8	65.2	93.6	65.2	81.59
IQSEC1	93.6	96.2	92.8	97.9	95.8	92.8	96.5	94.9	98.8	92.5	95.18
CPN2	78.4	84.3	63.2	83.7	92.9	59.6	94.7	59.5	94.1	62.3	77.27
MYOD1	95.3	93.1	84.6	97.8	92.5	83.1	96.9	81.8	94.7	84.3	90.41
ZNF410	95	95.5	90.9	96.1	98.3	93.3	98.9	93.8	99.4	94.2	95.54
OSBPL8	98.9	99.4	93.5	99.7	98.8	92.9	99	93.6	99.6	93.7	96.91
LOC100469206	96.7	98.2	92.8	94.1	96.8	93.8	96.1	93.3	94.3	91.8	94.79
PPP1R11	93.9	94.4	83.6	93.9	100	82	100	82	100	69.9	89.97
ABRAXAS1	93.9	94.6	69.1	94.9	95	66.7	95.3	69.1	95.8	69.4	84.38
MLIP	77	86.2	66.5	82.6	84	57.9	81.4	66.2	91.1	65.9	75.88
GON4L	80.8	86.2	67.2	86.9	82.4	64.4	85.1	67.6	89.7	64.6	77.49
ARPC5	100	100	100	97.4	100	100	97.4	100	97.4	97.4	98.96
KLF7	100	100	90.1	97.7	100	90.1	97.7	87.8	97.7	84	94.51
MRNIP	79	79.5	51.8	76.7	79.4	49.1	81.8	49.7	77.1	50.1	67.42
PRIM2	92.7	93.7	88.2	90.3	94.3	87.4	96.1	87.8	92.9	84.5	90.79
DMKN	72.8	80.9	57.7	77.8	73.2	60.4	74	66.7	75.7	55.9	69.51
WSCD2	97.5	97.3	90	94	97.7	90.5	94.3	90.4	94.2	86.8	93.27
RASL10B	100	100	98.5	100	100	98.5	100	98.5	100	98.5	99.4
ALDH8A1	93	92.8	86.2	91.6	96.3	88.3	96.1	88.9	96.5	87.7	91.74
LZTS2	96.1	96.7	82.4	96.7	95.7	81	96	81.1	95.7	81.3	90.27
IL10	93.3	93.3	73	93.3	95.5	74.6	97.8	74.6	96.6	76.3	86.83
MDM2	92.8	96.7	76.4	94.6	94.3	74	93.8	78	97.1	76.6	87.43
DBX1	85.7	85.3	80.1	86	97.5	87.2	98.7	87.2	97.5	87.9	89.31
ARHGDIB	98	98.5	88.5	98.5	99.5	89.5	99.5	89	99	89.5	94.95
NGEF	94.5	95.1	89.5	97.1	93.4	85.4	97.6	85.7	96.2	95.6	93.01
MOB2	94.8	96.1	93.5	96.1	90	84.2	89.5	87.4	99.1	85	91.57
SPHK1	86.3	87.1	72.3	86.3	87.9	65	81.4	72.1	90.2	74.5	80.31
OSGIN2	97.4	97.4	92.1	97.9	96.9	92.7	97.6	92.2	97.5	92.4	95.41
LCT	80.2	81.2	69.4	80.5	91.7	77.5	93.1	77.7	92.6	77.8	82.17
GIPC1	98.8	98.5	91.8	97.9	99.7	92.8	99.1	92.5	98.8	92.5	96.24
SLC43A1	94.1	95.3	83.8	95.3	95	82.7	95.5	83.6	95.7	83.1	90.41
UBR7	95.3	96.9	87.1	96.5	95.5	86.8	96.5	86.1	96.5	86.1	92.33
DRGX	90.2	93.9	94.3	91.3	95.8	89.7	97.3	93.5	97	91.3	93.43
WDFY1	98.6	98.6	88.5	99.1	97.8	89.7	98.5	89.2	98.8	89.7	94.85
PCOLCE2	94.2	94.5	86.3	94.4	92.6	87.3	92.5	84.1	91.6	85.8	90.33
TDP1	90.1	84.7	80	86.2	86.2	80.5	89.7	77.7	90.4	75.3	84.08
ADGRG4	76.7	77.8	51.2	76.1	77	50.5	81.3	50.4	76.2	50.7	66.79
FAM102A	96.7	97.1	92.3	79.8	97.5	90.7	79.6	90.6	80.1	79.8	88.42
EED	100	94.6	100	94.6	94.6	100	94.6	94.6	100	94.6	96.76
PPIE	99	100	98	96.5	99	97.4	95.8	98	96.5	95.2	97.54
AFTPH	90.4	91.4	73.7	94.8	94.2	75.2	92.7	76.4	92.3	73.5	85.46
LOC100463551	97.6	98.3	94.3	97.8	99	92.9	99	96.8	99.3	95.5	97.05
NSG1	100	99.3	98.6	100	99.5	98.9	100	98.4	99.5	98.9	99.31
CADM4	99.4	100	99.4	99.4	99.5	95.1	100	99.2	99.4	98.2	98.96
TTYH2	92.8	92.4	80.7	92.2	94.1	80.3	94.7	80.7	93.9	80.2	88.2
IGSF23	63.6	58.6	41.5	65.1	74.5	39.9	69.2	37	64.6	46.8	56.08
AMIGO2	90.8	92.3	86.2	90.2	94.4	86.2	93.7	87.3	93.9	85.6	90.06
R3HDML	92.8	94	85.7	93.5	90.4	81	90.5	83.7	90.3	83.6	88.55
LOC117798878	94.3	95.1	84.7	94.3	93.8	83.3	98.8	84	93.8	83	90.51
ASAH2	79.9	82	72.6	83.8	87.5	77.4	87.8	74.3	86.5	77.3	80.91
SSC5D	79.1	80.5	78.9	82.2	73.3	56.6	68.1	57.9	69.4	63.8	70.98
CCN4	94	93.2	82.3	93.8	93.5	81.7	96.1	81.7	93.5	83.6	89.34
SLC16A10	95	96	85.1	95	97.1	84.7	96.2	82.9	96.5	85.4	91.39
SCNM1	92.6	94.3	79.7	93.9	95.2	78.6	95.7	79.7	96.1	79.7	88.55
TATDN3	95.3	95.3	84.9	92.7	93.1	81.9	93.1	84.1	91.2	81.5	89.31
SEMA6B	96	96.9	68.4	96.9	93.2	90.8	96.9	89.3	90.7	90.9	91
PPP1R12C	58.4	84.5	81.4	67.8	65.3	57.6	60	81	77.2	66.7	69.99
ACP6	89.3	88.9	77.2	88.9	92.1	73.6	91.4	73.9	91.6	75.7	84.26
DCSTAMP	83.9	81.9	71.2	83.9	83.4	67.1	90	67	83.2	69.5	78.11
RTP1	95.4	94.3	91.3	95.4	95.8	94.7	97.3	91.6	96.2	93.2	94.52
TMBIM7P	94.3	95.8	64.1	87.9	88	57.8	82.7	58.3	84.8	56.3	77
DCDC2	83.1	88.3	80.3	88.5	83	78.4	92.7	77.9	91.1	81	84.43
KIFC3	97.1	96.8	83	94.7	97.3	82.2	95.7	81.9	95.3	82.8	90.68
ARID3C	79.3	86.9	76	93.4	87.8	79.1	83	77.4	89.3	73.3	82.55
DGAT1	96.3	88	87.4	92.8	88.5	88.7	92.3	81.1	92.6	81.6	88.93
ALMS1	30	88.2	63.5	71.2	91.5	62.5	78.7	63	76.2	63.6	68.84
TTC5	94	92.5	86.5	94.5	95.9	90	98.6	88.4	97	89.8	92.72
RIPOR2	90.1	87.9	84	88.8	86.4	82.7	91.8	82	86.2	82.2	86.21
IFT43	62.2	70	70	89	77.2	63.1	95.5	69.5	92.2	95.2	78.39
DNAI4	89	90	73.4	89.9	92.7	73.7	92.9	73.2	92.1	80.2	84.71
ARV1	94.3	94.7	74.7	94.3	93.3	75.5	93.3	76.9	94.7	74.7	86.64
CRAT	96.3	97.1	89.3	96.2	96.3	89.6	96.6	90	96.3	89.1	93.68
MON1B	96.6	97.8	86	93.5	97.5	85.8	94.2	85.3	94	82	91.27
PRR29	77.6	73	56	74.7	80.5	56.2	84.9	53.4	78.2	55.8	69.03
C4H3orf49	88.9	91.8	70.7	89.9	89.6	68.1	93.8	70	89.9	67.7	82.04
POMT1	85.6	87.8	77.7	83.7	95	81	92.9	80.8	91.6	78.2	85.43
USP11	96.3	96	76.8	89.6	96.5	76.8	91.6	77	91.6	74.2	86.64
TNIP1	90	81.5	80.5	90.2	83.4	79.2	91.7	70.8	84.7	78.4	83.04
MIER3	99.6	99	92.5	98.7	99.4	93.2	99	92.6	98.5	92.2	96.47
LOC100467946	79	80	69.7	68.8	90.4	74.7	89.7	76.7	91.4	77.1	79.75
PNKP	80.5	87.8	79.2	80.1	77.6	71.6	74.9	75.1	82.8	72.3	78.19
CEP135	88.9	88.2	70.9	89.7	93	67.4	96.3	66.1	93.9	68.6	82.3
CATSPER1	72.5	83	69.8	76.9	85.1	68.5	88.3	65.5	87.2	66.7	76.35
RMI1	72.4	84.3	65.1	82.1	80.9	61.2	80.5	70.4	91.4	70.2	75.85
PI15	98.4	97.7	91.5	98.8	98.1	91.9	98.8	91.9	98.1	92.2	95.74
SIM1	96.2	96.5	93.8	91.8	99.3	97	94.8	97	94.9	92.5	95.38
TMEM145	60	63.9	64.1	62.1	96.8	88.4	98	87.1	97.5	88.1	80.6
INSYN2A	74.8	76	66	72.9	91.2	75.4	84.3	74.8	81.4	74.5	77.13
LMAN1	89	89.2	83	84	95.8	84	90.2	84.7	89.8	84.2	87.39
SIM2	96.8	97	94.3	96.7	98.3	91.1	98.7	94.9	97.9	94.7	96.04
C14H18orf54	84.8	89.5	60.2	86.5	92.8	57.1	89.7	62.9	92.3	61.3	77.71
CRISPLD1	99	99.2	94.6	98.6	99	94.8	98	95.2	98.6	94.8	97.18
NGF	90.9	93.4	79.6	91.3	95.4	81.2	97.1	82.5	95.9	80	88.73
TRIB2	99.7	99.7	98.5	99.7	99.4	98.5	100	98.3	99.4	98.5	99.17
TP63	100	99.6	97.9	100	100	99	100	98.4	100	98.7	99.36
CFAP97	90.7	90	67.3	90.4	92.5	67	94.4	66.7	91.7	72.8	82.35
CDC42EP3	87.4	92.1	90.1	75.5	90.9	81.9	74.4	85.8	77.6	72	82.77
ACYP2	84.6	85.5	84.2	85.9	86.8	80	94.6	78.7	89.1	79.5	84.89
IRS4	80	85.4	75.5	76.1	79.8	73.5	79.3	75.5	79.6	72.6	77.73
TLK1	99.6	99.7	95.4	98.3	99.9	95.8	98.1	95.7	98.3	93.7	97.45
TOR1AIP1	78.7	80.2	59.4	79.7	82.4	66.3	89.1	63.9	86.3	66.7	75.27
BMPR1A	99.8	100	97.7	99.6	99.8	97.6	99.4	97.7	99.6	97.4	98.86
MZB1	86.3	89.9	75.3	88.9	91.6	72.5	90.5	73.2	92.1	71.4	83.17
ACD	81.1	88.5	56.2	88.9	83.9	54	87.7	57.6	94.6	66.1	75.86
AMMECR1L	99.7	99.7	98.4	99.4	99.4	98.4	99.7	98.1	99	98.1	98.99
CASZ1	92.2	89.4	78.6	82.5	92.9	85.5	90.4	82.3	87.5	83.3	86.46
DYRK4	89.7	90.2	73.3	89.9	92.2	73.6	94.5	74.5	92.1	73.2	84.32
DES	98.2	96.7	93.2	96.4	99	95	99.5	94.5	98.5	94.6	96.56
LOC100469265	92.1	92.1	82.9	93.4	92.8	82.9	90.5	82	92.4	82.9	88.4
FAM163B	91.2	94.5	88	93.9	88.3	84.1	91.3	89.8	92.7	88	90.18
CLEC12A	77.4	80.8	52.1	70.8	82.3	52.1	76.2	52.5	79	48.8	67.2
TMOD3	97.4	86.5	90.6	85.9	86	91.2	85.5	79.3	96	78.7	87.71
FOXI1	91.8	90.7	78.1	89.2	90.7	77.6	87.6	82.3	93.4	83.9	86.53
SHCBP1	91.5	94.9	78.6	94.7	93.9	75.5	93.8	78.3	97.5	79.1	87.78
IFNGR1	77.5	78.6	46.8	80.8	79.1	44.4	85	45.8	83.8	45	66.68
PENK	79.7	85.3	69.4	83.5	88.2	79.5	86.4	77.6	94.6	74.6	81.88
ABCB10	93.5	95.4	83.1	88.7	93.5	86.5	94.7	85.6	92.3	80.7	89.4
MXD4	97.9	95.9	73.9	84.9	94.2	92.9	94	91	90.7	88	90.34
WNT9B	91.7	95.6	93.6	88.5	97.6	92.5	92.1	93.7	90.3	88.9	92.45
PDRG1	97.7	96.2	91	97	97	90.2	97.7	91.7	97	90.2	94.57
C1H3orf38	92.9	94.5	83.4	93.3	94.2	85	95.4	83.1	95.4	84	90.12
USB1	86	88.7	72.8	89	92.3	75.1	95.5	73	94	74	84.04
WARS2	91.8	92.7	85.5	92.7	92.8	83.3	93.7	83.3	94	84.6	89.44
DTWD1	89	90.4	64.6	87.4	97.3	68	95.7	68	95.7	68	82.41
RAB29	96.6	96.6	92.6	97.5	97	92.6	97	93.6	97	92.6	95.31
UNKL	72.3	78.9	72	81.7	79.7	71.7	76.2	77.4	81.6	80	77.15
PARP3	91.1	60.2	79.7	90.4	61.4	79.6	94.2	54.4	60.8	80.3	75.21
APBA1	91.5	85.5	88.5	89.5	91	88	89.6	91.8	96.1	94.2	90.57
KLC1	98.2	99.4	94.7	99.5	98.5	94.7	98.5	95	99.8	95.3	97.36
LOC100465298	94.6	100	98.5	100	94.6	92.8	94.6	98.5	100	98.5	97.21
KCNA10	91.9	93.9	91.7	94.7	93.5	92.6	94.3	93.5	95.1	93.2	93.44
IKBKE	92.6	85.8	81.8	94.3	84.3	80.9	95.4	76	84.8	81.7	85.76
EVPL	87.9	86.9	78.1	79.9	87.7	77.9	83	78.8	78.5	70.8	80.95
MGAT5B	96.3	88.7	91.3	96.2	87.4	90.4	96.2	82.5	87.5	89.6	90.61
DTX3	100	100	92.2	100	100	92.6	99.7	99.4	100	92.5	97.64
GPR84	84.7	81.2	79.3	85.7	88.3	77.9	90.6	76.8	87.2	79.9	83.16
TNKS1BP1	77.1	80.9	62.3	79	79.4	59.3	82	58.1	78.5	62.8	71.94
FBH1	94.1	96.3	89.9	96.2	93.8	88	95	89	96.1	90	92.84
RBPJ	98.9	98.9	97.1	98.6	100	98.2	98.6	98.2	98.6	99.5	98.66
TRIP11	82.6	84.8	68.3	83.2	91.4	66	85.4	68.6	85.8	71.6	78.77
EPGN	92.2	92.8	79.2	92.2	96.1	77.8	96.7	76.6	95.4	77.1	87.61
RGS3	89.8	91.5	76.1	94	95.6	79.3	95.1	84.9	96.4	91.9	89.46
MAP3K7	99.8	99.8	99.2	99.6	99.7	99	99.4	99	99.4	98.9	99.38
PPP1R37	90	94.2	81.5	91.9	88.8	83.3	92.2	81.7	90.3	83.4	87.73
CDKL1	94.6	92.9	90.9	91.7	92.4	88.9	91.1	88.4	88.7	84.1	90.37
EMD	92.3	90.7	78.5	90.1	91.8	81.9	96.1	77	89.7	80.3	86.84
CYYR1	93.6	94.8	68.8	96.4	93	74.2	94	71.9	97.6	82.5	86.68
RAB30	100	100	100	99.5	100	100	99.5	100	99.5	99.5	99.8
WDR45	88.6	78.4	88.1	86.2	87.3	98.9	87.2	86.4	89.3	96	88.64
SGSM3	97.3	94.9	95.2	98.1	94.1	94.7	98	91.3	94.9	95.1	95.36
MICU1	87.5	87.9	91.9	99.3	93.5	82.6	99.3	82.8	99.3	97.9	92.2
POLE2	97.2	94.8	88.6	97.2	96.7	89.3	98.7	88.8	96.6	89.8	93.77
OBSL1	91.7	92.6	82.4	92.7	95.5	82.1	95.5	82.9	94.9	82.1	89.24
CRTAC1	97.5	97.6	94.2	98	96.7	93.1	97.4	92.8	97.5	94.4	95.92
SLC35C1	95.7	96.4	87.1	95.3	97.2	87.2	97.2	87.3	97.2	86.5	92.71
LOXL4	84.1	94.7	88.2	95.1	88.7	82.7	89.8	87.2	95.3	85.8	89.16
OPTC	83.5	77.7	65.4	85	75.8	63.5	89	72.1	77.4	63.5	75.29
SPHK2	85.1	87.8	77.9	90.2	92.1	78.4	90.9	81.6	89.9	80.2	85.41
LOC100467553	83.5	84.6	69.6	83.5	95.2	76.6	93	77.5	93.6	77.1	83.42
CHRNE	66.8	66.8	62.6	94.5	90.6	86.4	95.2	84.7	93.8	89.7	83.11
FOXA1	91.3	89.6	88.5	83.4	96	93.6	88.4	90.3	87.7	84.4	89.32
ZNF143	99.2	98	91.2	99.8	97.5	90.4	99.3	91.7	98.1	91.4	95.66
SCAF8	96.5	96.2	88.7	96.3	97.1	88.8	99	90.4	96.8	89	93.88
LRRFIP1	69.5	67.4	41.4	64.1	69.4	44.6	84.5	44.9	72.2	50.8	60.88
TRAF3IP1	80.2	80.4	71.1	72.2	84.2	71	74	69.7	69.8	70.7	74.33
TENT5D	97.1	93.8	84.6	93.3	94.8	87.1	94.5	84.9	90.8	82.1	90.3
WT1	90.5	66.8	96.5	99	81.4	93.6	95.8	76.3	77.2	97.1	87.42
LOC100476759	85.6	89.3	60.5	82.8	93.8	60.5	88.9	61.3	89.7	60.7	77.31
YARS2	91.6	90.4	86.6	91	94.1	85.4	94.8	84.3	93.9	84.5	89.66
PACSIN3	80.2	93.9	88.4	85.8	82.3	78.5	76.5	91	88.9	86.8	85.23
RASD1	98.6	95.1	96.8	89.3	97.3	98.2	90.4	94.6	89.6	88.4	93.83
KDM2A	99.6	98.2	96.2	99.7	97.9	95.9	99.4	97.3	98	95.8	97.8
AKNAD1	69.9	75.2	43.2	75.2	74.9	38.5	83.4	40.5	75	40.5	61.63
HERC1	97.9	97.9	96	97.4	98.1	96.3	99.1	96.2	98.5	95.5	97.29
RASGEF1B	96.8	98.9	92.5	98.9	97	94.1	97.3	96.6	99.2	96.6	96.79
GLRX2	100	84.6	79.8	95.9	87.3	71.2	90.2	77.1	97.6	82.1	86.58
GET3	100	100	99.7	99.7	100	99.7	99.7	99.7	99.7	99.4	99.76
CHRDL2	95.3	96.3	74.3	92.5	96.7	74.3	93.6	73.5	93.3	69.5	85.93
SLC49A4	95.4	96.2	92.3	98.8	96.2	92.3	99.1	91.4	98.8	96.1	95.66
COG8	90.2	91.8	87.1	92.9	96.2	87.6	92.8	89.9	96.1	89.5	91.41
OSMR	82.2	86.1	54.2	82.4	87.4	54.3	87.7	55.1	89.1	55	73.35
ERCC6L	81.7	86.6	66.3	83.8	85.4	67.1	89.6	66.4	87.6	65.1	77.96
P2RX6	86.5	83.5	76.1	86.5	91.9	82	94.4	81.9	92.3	82.6	85.77
PUS7	99.1	96.4	87.2	94.2	99.1	92.3	98.1	87.1	95.4	88.4	93.73
LRSAM1	83.8	88.6	83	92.6	85.8	76.3	86.9	82.6	89.5	83.8	85.29
MYCBPAP	80.6	83.1	67.5	83.2	83.8	69.1	85.1	65.8	85.2	65.1	76.85
ARL10	99.1	99.1	91	98.2	97.3	87.3	96.3	89.8	97.9	88.5	94.45
LIN37	96.3	92.6	91.9	93.8	94.7	94.3	91.1	90.7	95.3	87.2	92.79
SCARB1	91.3	95.3	81.3	93.2	93.2	78	93	79.9	97	78.9	88.11
QDPR	99	98	94.6	98	98.3	95	98.3	94.2	96.7	94.2	96.63
OSCP1	92.5	90.2	87.8	94.3	91.3	86.4	96.1	86	71.5	88.9	88.5
TMEM176A	67.3	69.3	55.1	64.3	71.8	56.1	78.9	57.7	73.1	54.8	64.84
SH2D1A	94.5	98.4	87.5	98.4	94.5	86.6	94.5	87.5	98.4	87.5	92.78
TAGLN	96.1	88.1	94.5	96.6	90	95	96.6	89.1	88.6	93	92.76
GBA2	96.5	96.1	86.1	94.9	97.5	87.1	97.3	86.4	96.1	85.5	92.35
ANKRD65	74.3	83.8	52.8	72.3	90.5	50.7	70.8	50	73.3	46.4	66.49
HNF4G	96.7	97.8	93.7	98.3	98.8	94.4	99.1	94.9	98.3	93.5	96.55
GPRC5D	95	95.6	83.2	87.6	94.6	82.6	90.9	81.8	88.6	77.9	87.78
RAMP2	77.7	82.9	63	75.4	84.5	58.4	78.8	64.4	80.8	55.6	72.15
FBXW7	99.8	95.9	99.3	100	95.7	98.6	100	94.9	99.8	99.4	98.34
PDE7B	93	92.5	90	91.8	96	91.6	97	92	93.7	90.9	92.85
SPEF1	91.5	94.1	88.1	93.7	91.1	84.7	91.9	86.4	94.5	86.1	90.21
RCOR1	94.7	99.7	93.3	100	94.6	94.1	94.6	87.7	100	93.8	95.25
NFKBIZ	93.1	94.2	81.5	75.4	94.3	80.7	76.5	81	76	68.7	82.14
TBX10	92.1	90.6	78.6	89.3	94	79.7	93.7	78.9	92	78.9	86.78
PAPOLG	95.4	98.3	94.1	98.1	99.4	94.3	99.2	94.6	99.5	94.3	96.72
DDX59	91.9	92.4	81.4	91.6	94.2	82.4	95.5	81.3	94.5	81.5	88.67
AADAT	88	91.1	75.4	86.9	90.1	72.9	88.6	74.9	90.4	71.4	82.97
SELPLG	62.4	69.6	68.7	69	75.7	73	79.4	73.7	79.8	61.9	71.32
IL4	84.8	78.8	39.3	78	82.6	37.9	86.4	35.7	79.5	35	63.8
PANK4	97.2	94.6	88.2	97.9	93.1	87.4	97.4	85.2	93.8	87.6	92.24
TMEM18	90.6	89.9	86.1	93.3	90.6	84.4	90.6	82.9	85.2	80.2	87.38
SLC38A11	86	71.6	77.5	86.9	79.3	79.3	96.5	67.7	79.8	81	80.56
CHORDC1	95.6	97.3	96.5	96.9	90.4	95.4	97.9	89.4	91.9	97.3	94.86
RING1	97.8	97.8	97.5	98.5	100	96.3	96.3	96.3	96.3	97.5	97.43
LOC100476823	83.8	84.6	73.5	81.4	94.5	86.7	95.8	83.3	93.6	90.7	86.79
SLC1A5	90.4	90.6	80.1	89.3	93.5	78.7	88.4	78.1	87.1	76.6	85.28
TXLNA	96.6	95.7	90	92.2	95.9	90.2	93.8	88.2	91.4	86.1	92.01
SNRK	96.1	94.4	93.3	93.2	97.1	89.6	95.6	88.2	94.4	89.2	93.11
PRKAB2	90.8	90	92.6	91.1	94.8	92	98.1	92	98.5	93.4	93.33
CRYAB	98.8	98.8	95.6	94	100	97.1	95.6	97.1	95.6	93.9	96.65
LPAR3	95.8	95.5	92.7	97.5	94.9	91.5	100	90.7	97	95.4	95.1
PDGFD	87.7	84.9	79	94.3	93	87.6	95.1	87.6	93	86	88.82
PCCA	94.8	95.2	87.6	98.5	94.3	91.4	98.2	87.4	98.2	91.7	93.73
PHTF1	95.3	97.5	92.9	97.3	96.3	90.5	97.4	92.8	98.2	92.7	95.09
TMEM8B	94.5	89.2	96.7	99.3	92.3	96.5	99	83.9	92.6	89.8	93.38
CKAP5	98	98	93.8	97.7	99	93.9	97.8	94.1	97.9	93	96.32
DCAF10	92.9	97.1	94.6	96.7	83.5	94.6	94.9	98.4	99.3	98	95
LMNA	93.8	93.4	92.8	91.4	97.7	89.5	95.9	90.3	97	91.1	93.29
C14H22orf15	88.6	68.9	65.8	87.7	95.4	61.7	93.2	62.4	94.5	61.3	77.95
CD3D	75.4	79.6	61.8	77.8	79.5	60.8	83.4	61.4	83	61.4	72.41
B4GALNT2	89.8	79.8	73.5	90.8	80.2	72.9	92.2	63.3	81.7	73.8	79.8
APOB	80.8	82.9	62.8	81.6	83.3	61	86.9	61.2	85.3	61.7	74.75
AVPI1	93.2	89.8	75.8	92.6	89.1	75.2	92.6	72.3	88.4	80.3	84.93
TMCO1	100	100	96.6	100	100	96.6	100	96.6	100	100	98.98
BEND6	94.5	95.7	79.4	96.8	92.4	77.2	93.5	79.1	94.6	78.3	88.15
INTS7	98.5	98.9	95.3	98.2	99.3	95.2	98.9	95.5	99.2	94.6	97.36
C15H12orf66	98.9	98.9	94.6	98.9	99.1	94.8	99.1	95.3	99.1	95.3	97.4
CCR7	96	95.5	87.6	96.3	95.3	88.1	98.9	86.8	96	88.1	92.86
NUP54	97.8	97.2	94.3	97.4	98.7	94	96.8	94.3	98.5	94.4	96.34
LOC100473935	96.4	94	79.5	90.9	93.6	79.7	91.4	80.9	94.3	80.8	88.15
NUDC	99.1	97.6	93.4	94.9	97.9	93.7	94.6	94	94.9	91.7	95.18
ZC3H8	75.9	88.5	79.6	83.9	80.4	66.8	73.6	77.6	85.2	71.4	78.29
TGS1	89.8	93.9	68.9	91.1	92	69.1	93.7	70.6	93.5	72	83.46
RGN	93.3	96.3	86.6	94.3	96	86	93.8	87.3	96	86.3	91.59
GCH1	84.9	88.3	87	98	83.1	91.9	84.2	81.3	86.7	85.8	87.12
LOC100466952	87.6	83	73.4	88.2	87	78	94.7	72.8	87.3	76.6	82.86
LIMCH1	73	65.4	60.9	61.7	57.6	58.1	55.5	71.9	88.7	68.4	66.12
NDN	89.5	91.1	77.5	89.4	95.1	82.2	89.4	81.2	90.3	82.9	86.86
LOC100483022	94.4	96.1	84.9	94.4	96.1	83.3	97.2	88.1	96.6	83	91.41
PLEKHG1	86.7	90	74.5	91.4	87	72.4	90.7	74.1	91.3	73.9	83.2
MTRF1L	85	87.3	74.5	85	95.5	80.3	96.1	81.1	96.1	80.5	86.14
AARS2	90.6	93	82.2	91.4	92.8	81.4	93.9	82.6	93.1	82.3	88.33
TNFRSF9	74.9	81.2	56.2	80	84.6	49	84.6	50.4	89.2	49	69.91
RBFOX2	98.4	98.4	92.6	98.2	100	93.8	92.5	93.8	92.5	87	94.72
PAX9	98.6	99.2	96.5	100	99.4	96.8	100	96.8	100	99.5	98.68
TMF1	91.7	90.3	77.7	88.8	94.8	81.8	92.2	81.8	90.8	85	87.49
VIPR1	89.9	91.4	80.8	89.2	93.4	78.3	94.4	81.1	92.3	77.4	86.82
FRMPD4	96.4	89.9	89.6	95.2	95.4	88.2	96.7	82.8	94.6	87.6	91.64
GPR157	91.4	83.7	81	90.9	88	82	93.8	80.7	88.5	82.8	86.28
ASTL	81.8	86.4	63.8	84.6	86.5	66.2	88.1	65.5	90.6	63.9	77.74
SLC11A2	96.9	96.9	92.8	96.6	97.5	93.1	98.1	93.3	96.3	93	95.45
UVSSA	77.8	77.5	62.2	76.9	80.1	62.3	81.4	60.5	78.4	64.4	72.15
TMED1	97.6	97.6	94.3	97.1	97.8	94.3	96.5	94.7	96.9	94.3	96.11
BCAR1	88.6	93.9	88.7	90.2	87.3	84.7	91.9	86.2	90.8	84.8	88.71
ZC3H13	91.6	94.2	75.3	91.5	92.4	76.5	91.1	77.5	93.1	77.7	86.09
FAM199X	100	99.7	97.9	100	99.7	97.9	100	97.7	99.7	97.9	99.05
TMEM101	99.6	99.6	98.1	99.2	100	97.7	99.6	97.7	99.6	97.3	98.84
ING5	92.9	93	87.5	94.8	95.5	87.5	97.2	83	98.5	85	91.49
MCM8	96.1	97	87.4	95.6	97.4	87.6	96.9	87.8	97.1	88.1	93.1
SLC31A1	81.7	85.2	97.2	90.4	91.6	97.9	100	97.2	100	97.2	93.84
BCL3	73.5	88.3	73	87.4	94.1	73.5	91.2	80.3	95	80.8	83.71
PPP1R1C	92.2	94	85.3	87	98.2	89	100	90.8	100	97.9	93.44
CFAP99	75.5	69.9	68.5	78	78.1	60.8	74.5	61.1	71	61.9	69.93
L3MBTL2	96.5	96.3	90.5	97.7	94.2	90.3	96.7	88.2	96.2	90.3	93.69
MAPK8IP1	83.8	84.3	81	85.2	85.4	82.6	84.1	91.4	84.4	80	84.22
TSPAN18	97	98	88.7	97.6	99.1	89.7	99.6	89.9	99.6	89.9	94.91
RBFA	75.7	78.7	58.7	NA	78.1	67.7	NA	61.3	85.3	NA	72.2143
CCRL2	72	76.5	52.3	73.2	80.1	49.6	83.1	51.6	80	50.3	66.87
HMBS	95.6	93.6	87.5	97.2	97	90.3	96.7	92.5	93.9	87.2	93.15
BCL9	97.7	96.5	90.7	96.8	96.7	90	97.2	91.4	97.8	91.9	94.67
MCF2	91.1	91.6	75.1	88	94.1	74.6	91.1	73.4	90.4	77.8	84.72
GJA3	79.1	78	66.5	76.2	89.1	67.9	88.8	68.1	84.9	68.8	76.74
TRIM21	83.1	86.8	67	86.4	92.3	69.4	91.2	70.3	93.6	69.4	80.95
CX3CL1	75.1	64.2	50.8	65.5	63.7	47.6	67.5	51.1	80.8	52.2	61.85
ABHD11	92.1	95.1	74	95.1	92.4	70.7	92.4	70	93.8	70.4	84.6
RHPN2	91.1	91.7	83.7	91.5	94.9	87	96.8	86.2	95.4	86.9	90.52
ACSF2	86.8	88	79.1	84	89.4	80.9	90.8	79.7	87.2	76.7	84.26
LOC100464768	88.8	92.4	76	90.4	88.8	74.7	91.6	76.2	91	76.6	84.65
MLLT1	92.6	92.8	70.9	82.6	95.8	66.4	86.1	67.6	88.4	69.1	81.23
SLC24A1	96.8	100	96.8	100	74.4	65	70.9	67.7	75.7	68.7	81.6
SELENOW	89.8	90.8	86	85.1	95.5	86.2	88.6	90.7	90.8	81.4	88.49
TAF1	94.9	97.7	88.1	90.8	95.5	91.2	89.4	88.3	91.3	85.8	91.3
PECAM1	82.7	86.1	62.8	86.5	87.2	63.6	89	63.1	92.7	64.7	77.84
OPA1	99	99	94.8	98.7	99.3	95	99.2	94.9	99	94.7	97.36
ACER2	100	99.6	94.2	99	99.6	94.2	99	93.8	98.5	92.5	97.04
SESN3	97	96.4	93.8	93.4	97.2	91.5	95.5	92.3	96.4	89.6	94.31
LHX2	100	100	98.9	92.6	100	98.9	92.6	98.9	92.6	91.4	96.59
STT3B	100	99.8	97.7	100	99.8	97.7	100	97.5	100	98.9	99.14
RBM42	94.1	97.4	89.6	97.4	92.9	85.7	93.5	91.6	99	91.8	93.3
TSPAN12	99	99	98	99.3	99.3	97.7	99.7	97.7	99.7	98	98.74
PALM3	93.1	70.2	43.8	73.3	86.2	62	82.7	48.5	76.2	50.5	68.65
KCNV2	87.1	89.6	79.4	89.9	88	83.1	86.6	81.9	91.1	81	85.77
PEX14	90.9	97.2	80.5	97.2	91.4	81.1	89.9	80.2	97.2	78.4	88.4
SPATA4	74	88.2	67.8	80.6	92.5	71.8	90	75.8	93.3	77	81.1
FCHO2	96.9	98.6	93.5	97.8	97	91.9	97.5	93.1	96.7	95	95.8
GLI2	82.4	84	68.9	77.4	91	71.3	82.6	70.1	84.3	63.7	77.57
PTPDC1	87.3	89.9	77.6	88.6	89.9	71.5	91.3	78.9	91.8	78.1	84.49
RNF214	95	94.8	89.3	98	98	85.2	94.9	85.1	94.6	89.8	92.47
KLHL15	99.8	99.8	99.3	100	99.8	99.2	99.8	99.2	99.8	99.3	99.6
GPR155	96.8	97.5	88.4	96.8	97.6	88.6	97.1	89.1	97.4	88	93.73
CLEC9A	83.3	82.9	52.1	79.5	82.6	49.1	80.4	52.1	79.9	44.9	68.68
ZC3HAV1L	87	91.4	68.4	88.3	93.2	69.8	93.4	72	94.5	71.5	82.95
CREG2	92.8	93.3	80.7	89.4	96.5	78.2	93.4	77.9	92.6	74.6	86.94
MFSD10	89.1	86.7	74.7	88.7	93.6	80.5	92.1	80.9	93.4	79.4	85.91
TSPAN31	99	98.6	86.7	99.5	98.6	86.2	99.5	86.7	99	86.7	94.05
ORAI1	97.5	97.2	90.6	89.8	98.3	90	90.4	88.9	90.2	86.1	91.9
LOC109490469	80.1	84.1	59.1	75.7	80.4	55.7	78.2	61.1	84.5	60.2	71.91
CLEC11A	97.8	91.3	81.4	65.9	92	82	66.3	77.1	72.1	57.3	78.32
KIFC2	80.6	82.1	64.4	71.1	91.2	70.3	80.7	73.6	79.6	74.6	76.82
PIK3CA	100	100	98.9	100	100	98.9	100	98.9	100	98.9	99.56
PDILT	85.4	86.6	67.1	93.1	92.8	68.4	93.8	69.4	94.4	74.2	82.52
REXO1	87.1	91.1	71.1	96.1	87.7	76.4	93.9	70.4	93	88.2	85.5
TNFRSF25	82.7	85.1	59.9	71.7	84	52.5	72.7	61.2	71.6	50.9	69.23
VSTM2B	98.6	96	97.9	93.8	98.9	91.3	99.4	97.7	94.6	98.2	96.64
TAPBP	85.9	87.1	70.5	83.3	92.6	70.2	88.8	72.4	89.1	68	80.79
NCOA2	96	97.5	92.3	96.8	97.9	92.1	97.8	93.5	98.6	92.9	95.54
PKDCC	95.2	91.1	81.4	94.9	97.3	91.8	98.3	91	96.6	90.8	92.84
ANKRD29	99.3	73.3	98.3	99	73.9	97.3	99.3	72	72.8	96.6	88.18
SLC38A3	95.8	95.8	88.3	95.6	97	88.5	98.6	88.3	97.6	89.1	93.46
MRPL57	89.7	87.1	79.2	84.2	92.8	79.8	87.9	80.4	88.2	82.4	85.17
USP26	72.9	78.2	36.2	67	77.6	34.7	68.5	37.9	68.1	32.3	57.34
LEXM	86.5	89.7	71.2	89.2	89	69.3	88.5	71	91	70	81.54
ELP5	81.2	84.9	72.2	82.5	88	71.3	90.1	74.2	88	72.2	80.46
MRPS6	90	90.8	80	92.7	95.4	85.5	92.2	84.7	97.2	82.6	89.11
USHBP1	80.1	85.5	61	86.1	80.1	57.9	84.1	59.2	88.5	60.1	74.26
PDCD4	99.8	99.1	98.1	99.8	98.9	98.1	99.8	97.2	99.1	98.5	98.84
IDH3A	97	99.4	97.5	99.7	95.5	92.4	97	98.1	99.4	98.3	97.43
MYSM1	90.5	94.3	76.7	91	93.2	75.3	95.2	78	93.6	76.1	86.39
PLAAT1	93.5	93.5	81.5	94.1	94.7	81.5	96.4	81.5	95.9	83.2	89.58
PITX3	97	98.3	94.4	97.4	98.7	95.7	99	96	99	96	97.15
TTC9C	94.3	95	90	94.3	97.7	90.6	98.9	91.2	97.7	90.6	94.03
CHST14	93.8	95.1	91.1	86.8	98.1	91.8	91	92.8	91.8	85.1	91.74
KLHDC2	99.5	98.5	95.3	99	98.5	95.6	99.5	97.9	98.5	95.1	97.74
DESI1	92.9	97.8	90.5	93.5	95.7	86.3	98.2	92	94.9	86.9	92.87
ETV1	99.8	99.4	97.6	99.2	99.8	97.7	99.5	97.6	99.5	97.5	98.76
SPRY1	98.4	99.3	83.9	96.7	98.1	83.7	95.9	83.7	96.6	82.8	91.91
STX17	98.3	99.3	80.5	99	98.3	80.5	98.7	80.1	99	80.1	91.38
PRLH	77	79.3	68	74.7	88.5	73.8	81.6	67.5	81.6	63.8	75.58
AK9	84.4	35	67.4	90.9	58.3	69.2	94.7	30.9	95.5	79.4	70.57
TAF5L	91.7	90.6	87.4	92.1	98.6	93.9	98.5	94.2	98.8	93.7	93.95
CLDN12	99.6	99.6	92.2	99.6	100	92.2	99.2	92.2	99.2	92.6	96.64
RASGEF1C	95.3	95.2	91.6	96.1	97.6	93.8	98.5	92.9	98.3	93.8	95.31
CCDC115	91.7	93.3	78.3	93.3	91.4	75.6	92	77.4	93.5	78	86.45
ZNF423	93.4	92.3	91.3	92.4	97.8	97.5	99.5	96.3	97.5	97.3	95.53
IDH1	99	98.6	91.8	98.6	98.6	91.1	98.6	91.8	99	91.3	95.84
HIVEP2	94.7	95.5	85.1	94.4	95.2	84.9	95.2	84.8	95	83.6	90.84
ANAPC1	99.1	99.5	91.9	98.4	99.4	91.7	98.9	91.9	98.6	91.7	96.11
PKHD1L1	89.5	92.3	79.9	88.6	91.4	79.5	89.2	81.2	89.5	77.6	85.87
NAT8L	89.2	90.2	87	86.1	99.4	94.3	99.4	94.1	95.2	91	92.59
ALDH7A1	85.4	88.4	86.6	96.3	79.6	77.2	87	79.8	89.7	86.8	85.68
EEF2KMT	89.9	91.2	73.4	88.8	91.8	70.6	91.2	70.9	90	67.5	82.53
DCTN3	99.5	98.4	93.5	99.5	98.9	94.1	100	93	98.9	94.1	96.99
CDKAL1	97.5	95.7	88.5	96.9	97.7	90.1	95.8	89.3	95.8	84.4	93.17
IRF2BP2	91.2	91.2	76.7	93.4	95.7	85.3	98	85.6	98.3	95.6	91.1
CCDC78	58.6	63.3	46	63.7	51.5	41	59.5	45.5	65	56	55.01
LOC100463765	94.8	92.5	88.8	91	95.2	89.3	93	86.6	93	85.6	90.98
STKLD1	70.1	79.3	59.9	73.1	78.6	59.9	79.7	62.7	80.6	62.1	70.6
FLCN	98.1	97.2	93.1	95.6	97.4	92.7	95.5	93.4	95.3	90.6	94.89
LSM2	98.6	98.6	98.6	98.6	86.1	100	100	100	100	100	98.05
VPS9D1	89.3	89.3	79.8	95.7	86.8	80.2	94.8	78.6	94.8	84.4	87.37
NSFL1C	96.2	99.5	97	96.2	96.2	93.8	97.3	97	96.8	93.8	96.38
RXFP2	97.1	97.3	86.4	96.3	95.8	86.3	97.1	86.2	97.6	81.8	92.19
TCAP	93.4	95.8	86.1	79.5	92.8	83.8	78.4	84.4	80.2	70.7	84.51
FAM184B	79.8	81.1	55.5	87.6	80.2	56.7	85.4	52.7	83.4	53.7	71.61
FAM189A1	88.4	87.1	64.8	83.4	90	66.1	91.2	70.9	88.5	58.3	78.87
C15H12orf50	92.6	93.7	85.3	92.8	91.9	81.1	92.4	80.5	91.8	81	88.31
PTCH2	96.8	96.4	90.4	97.1	96.4	90.4	98.1	90.4	96.8	90.3	94.31
TRAPPC12	84.7	88.3	78	77.6	83.9	72.1	78.2	75	83.1	70.8	79.17
TMEM17	97	92.3	81.8	96.5	93.2	81.8	97.5	79.2	92.3	81.3	89.29
KMT5B	85.9	84.3	76.3	87	81.9	75.2	92.6	81.6	92	89	84.58
MED25	100	67.6	61.9	64.8	93.5	89.3	93.3	85.1	93.7	88.1	83.73
WNK3	72.5	78.7	66.9	67.2	90.3	76.5	91.4	80	94.1	76.5	79.41
TOE1	92.4	92.4	83.2	93.5	93.6	81.1	96.3	82	94.5	82.6	89.16
C1D	97.2	97.9	87.9	89.4	99.3	90.1	90.8	89.4	91.5	83.7	91.72
DDA1	49.7	50	48.9	49.7	100	97	100	97.1	100	97	78.94
NANOS3	78.8	95.9	86.9	79.5	75.1	66.3	90.4	72.9	78.4	69.1	79.33
MEOX1	91.7	89.4	79.6	92.5	86.6	77.3	93.3	72.9	85.8	78	84.71
FN3KRP	89	91.6	87	80.4	91.6	85.2	83.9	90.3	83	79	86.1
EXPH5	75.6	77.5	52.3	75.9	78.7	52.2	81.3	53.2	78.8	52.9	67.84
AMER2	40.9	39	37.9	43.1	90.8	73.8	82.4	74.3	85.6	66.9	63.47
GSG1L	90.1	91.9	85.6	77.5	97.7	91	87.1	93.2	88.3	82.2	88.46
CENPL	90.3	90.9	81	93.5	98.6	85	97.7	84.4	98.6	84.1	90.41
ZBTB11	95.3	95.3	83	95.2	97.5	83.5	97.9	83.5	97.4	83.3	91.19
CCDC88A	91.4	97.1	93.1	98.3	93.1	89.8	93.5	91.7	98.6	95.6	94.22
POLR3D	97.7	94	94	99	93.7	93.7	98.2	91	94.5	94.7	95.05
PDGFB	95.3	82.8	81.5	93.3	87.3	84.7	96.3	84.1	85.9	83.3	87.45
ZNF275	66.4	73	64	82.8	87.7	81.4	79.7	87.6	87.5	81.2	79.13
PHF7	95.6	96.1	85.2	94.3	95.6	85	94	85.6	95.1	82.8	90.93
BPIFA2	61.9	75.3	30.9	62.4	67.5	33.8	76.1	34.6	70.2	35.7	54.84
RNF216	97.4	98	82.7	95.1	97.5	83	96.1	83.1	95.2	77.6	90.57
HRH3	92.3	82.6	78.1	85.4	83.1	77.5	88.1	80.1	87.6	81	83.58
TMPRSS5	85	87.2	74.6	85.2	86.6	76.2	84.7	73.2	86.4	72.8	81.19
ADCY9	95.6	97.6	90.4	93.8	95.9	90.5	94.3	90.1	93.4	87.6	92.92
MSANTD2	93.2	93	89.4	98.5	95	88.9	99.1	91.4	99.6	97	94.51
FABP1	96.9	98.4	84.3	97.6	98.4	87.4	97.6	85.8	99.2	85	93.06
HHIP	97.1	96.9	88.8	91.5	97.7	90.6	92.4	89.9	92.6	94.9	93.24
OTULINL	91.1	93.9	81.5	92	94.2	81.7	96.3	84.4	95.1	82	89.22
KIF3A	94.6	100	98.2	98.2	94.6	93.5	97.6	98.2	98.2	100	97.31
STN1	81.1	84.6	66.1	90.3	78.3	62	85.2	60.5	86.2	65.8	76.01
TBXT	89.9	88.5	87.2	92.9	88.9	85.9	87.8	84.5	85.8	85.2	87.66
TMEM72	90.5	85.8	73.1	88.7	83.6	73.5	91.3	66.2	81.5	73.1	80.73
PARL	98.4	98.9	92.3	90.3	98.9	91.8	90.5	91.8	90.8	91	93.47
XRRA1	85.9	86.6	72.8	87.9	86.4	71.4	89.2	72	90.6	73.6	81.64
CNGB3	86.6	85.7	70.3	95	89	75.6	96.1	70.6	94.9	76.5	84.03
PMPCB	91.3	93.2	86.1	91.8	96.1	89.2	96.1	90	97.1	89.2	92.01
ROR1	97.7	99.4	95.7	97.2	97.9	94.2	98.3	95.7	97.2	93.5	96.68
CARMIL1	90.9	91	82.5	98.4	92	81.2	97.5	82.3	95.9	92.6	90.43
NMI	80.9	79.9	61.7	80.5	88.9	62.6	91.4	61.9	89.2	63.9	76.09
SDCBP2	90	90.8	73.8	89.3	89.9	74.8	92.8	75.6	91.1	76.6	84.47
OXGR1	90.5	95.8	83.7	91.7	88.4	76.6	91.7	81.3	88.7	79.2	86.76
RGS11	81.2	78.5	75.1	80	82.4	75.8	86.3	70.9	75.2	80.6	78.6
BCL7B	90.8	93.2	84.6	93.2	97.7	87.7	97.7	90.1	100	90.1	92.51
PLA2G15	93.9	94.4	87.4	93.9	95.8	86.9	96.3	85.7	95.3	85.2	91.48
SAMD8	94.8	90.6	88.9	98.8	88.1	87.7	99.3	83	99.3	94.9	92.54
ARHGEF9	99.8	99.8	92.3	97.9	100	92.4	98.2	92.5	98.2	87.4	95.85
FAF2	99.8	99.1	97.8	99.8	98.8	97.5	99.5	97	99.8	97.6	98.67
PTPRN	95.3	95.7	85.8	95.1	94.8	84.4	96.7	85.7	94.6	84.4	91.25
VRK3	82.6	77.3	65	80.4	81.2	65.2	84.5	61.3	83.9	63.5	74.49
RECQL5	87.5	88.3	77.2	83	90.9	77.3	87.1	77.2	87.2	74.3	83
ASB4	98.1	91.5	86.1	98.1	91.8	86.6	99.2	90.8	98.1	93.1	93.34
PRCC	90.7	97.6	82.3	95.8	91.3	89.6	89.7	96.8	96.2	95.8	92.58
PTPN18	NA	69.6	61.6	68.7	83.4	65.8	77.5	77.9	93.6	78	75.1222
FAM210A	95	93.1	77.8	94.6	91.8	78.7	94.6	69.8	91.8	77.4	86.46
AMPH	68.4	89.9	74	94.2	67.6	63.8	67.6	73	93.5	77.5	76.95
PHC3	89.5	95.1	77.6	95.6	90.7	86	90.5	77.5	99.5	78.8	88.08
LRRC52	90.8	96.2	60.4	93.3	90.8	58.5	92.1	61.2	94.3	60.6	79.82
SIDT2	99.4	96.2	93.7	95.9	96.6	93.2	96.3	95.7	98.2	95	96.02
FFAR3	87.4	90.9	76.3	89.5	85.1	79.3	88.9	76.2	92.2	76.9	84.27
CASQ2	88.9	98.1	89.3	97.3	97.6	89.6	97.6	89.6	97.9	89.9	93.58
HBS1L	94.6	94.6	86.7	96.9	97.5	88.8	98.5	89.4	97.7	91.5	93.62
NCF4	93.5	93.2	86.1	94.5	94.4	87.9	96	86.7	96	87.3	91.56
TH	92.1	91.2	86.3	74.5	86.5	85.9	75.5	81.4	71.6	69.8	81.48
TECPR2	91.5	94.1	81.4	92.8	91.7	79.1	92.3	81.7	93.4	82.1	88.01
RNF112	93.1	83.3	78.1	93.4	86	82.4	96.4	71.3	76.3	77.1	83.74
TMEM204	92.9	93.2	88.1	94.2	91.8	88.5	94.7	84.9	93.2	88.1	90.96
NOD2	88.9	88.2	73.9	89.6	89.3	74.9	92.1	74.7	89.8	73.9	83.53
SLC30A5	96.6	96.5	93.7	98.4	97.2	93.5	97.6	92.8	97.5	94.5	95.83
C13H20orf194	96.6	96.4	86.1	97.5	96.4	85.7	97.8	85.5	96.7	86.2	92.49
PAX4	86.5	92.2	77.2	92.9	89.9	76.9	92.6	77.9	93.3	83	86.24
UBE2O	95.4	96.1	90.5	92.4	97.1	88.7	94.1	88.4	95.5	86	92.42
VGLL2	97.7	73.5	85.6	98.4	69.6	85.1	97.3	64.7	98.9	89.6	86.04
CCDC153	69.4	64.8	57.8	44.8	83.2	59.3	82.8	66.1	80.9	59.3	66.84
TMEM220	85.5	85.5	75.4	91.3	85.6	66.5	90.5	67	91.3	72.3	81.09
MICAL2	95	82.4	83.5	93.7	87.5	82.8	93.9	78.9	85.7	82.7	86.61
CD40LG	91.2	91.5	73.1	92.3	95	75	95.8	74.2	96.9	75.4	86.04
MPPE1	88.3	80.9	73.2	89.1	81.4	77	92.9	66.7	81.8	72	80.33
WDR59	96.6	98	94.3	98.2	97	92.7	96.6	94	98.9	93.6	95.99
LOC117799447	91.2	91.8	81.9	93.1	88.2	80.6	92.5	78.8	89.4	81.2	86.87
ST6GALNAC6	93.9	92.6	95.1	98.3	88.2	90.1	98.7	88.5	90.8	92.8	92.9
TRMT6	89.6	94.6	83.7	90.9	94.2	81.1	87.3	83.5	90.3	82.3	87.75
RPS6KL1	87.1	84.8	75.5	80.4	88.5	75.3	79.8	71.4	73.7	67.6	78.41
APBB3	95.6	80.5	89.3	96	90.2	89.9	98	75.3	91	90.8	89.66
GDPD2	93.1	93.1	84	93	99.4	82.8	99.4	82.2	98.9	82.8	90.87
CABYR	77.2	80.7	61.2	74	75.3	55.1	78.8	45	77	52.7	67.7
RCSD1	83.2	76.8	80.1	80.9	68.2	63.2	63.1	74.9	82.9	64.4	73.77
SLC25A48	88.9	92.1	77.1	94.2	89.9	81.3	92.7	77.8	95.4	80.1	86.95
IMPACT	95.8	95.8	82.5	97.7	98.7	81.8	98.4	81.8	98.4	82.2	91.31
RMDN3	91.2	89.9	79	91.9	91.7	80	94.5	80.6	91.5	79.7	87
TADA1	98.2	95.1	93.1	99.7	94.2	92.8	98.5	89.3	95.4	93.4	94.97
NELFCD	98.6	100	95.7	100	98.6	94.3	98.5	94.7	100	95.6	97.6
TCF19	86	87	74.9	79.8	93.9	79.8	88.7	80.3	88.7	78.3	83.74
VCAN	80.9	82.1	58.4	82.5	85	61.5	88.7	60.5	85.2	61.2	74.6
SOGA1	95.5	96.9	89.2	96.3	95.5	87.7	96.2	89.1	96.5	88.5	93.14
BPIFA3	85.3	87.4	68.9	85.3	89.5	69.4	90.3	69.7	89.5	71.9	80.72
BNIPL	91.3	84.4	80.2	95.5	84.9	81.2	95.1	75.7	96.2	88.1	87.26
SLC35C2	98.5	93.9	96.8	99.4	91.8	96.8	97.8	91.8	94	97.4	95.82
WDR77	96.3	96.3	89.4	95.7	98.2	88.3	98.8	87.7	97.7	87.1	93.55
PEX11G	84.3	77.5	71	82.7	79.6	74.4	91.6	64.1	77.3	74.6	77.71
CD81	97.2	98.2	90.2	96.3	99.1	89.7	88.6	89.7	97.7	88.8	93.55
YIPF7	83.5	82	75.3	81.2	90.2	79.6	92.5	78.4	90.2	77.6	83.05
RNF222	90.7	90.4	83.4	91.2	93	84.3	93.8	80.8	92.9	83.8	88.43
LOC100465057	80.9	83.1	55.9	83.1	85.8	58	88.5	59	91.2	58.6	74.41
TPST2	96.8	95.6	94.1	97.9	95.6	95.2	98.4	93.2	97.1	95.7	95.96
PACS2	95.9	96.6	92.9	96	95.2	90.3	94	90.6	96.2	91	93.87
DYNC2I2	89.8	94.4	82.4	93.7	90.8	81.7	91.8	81.8	94.8	82.3	88.35
RSAD2	89.8	91.2	82.6	90.4	91.2	80.3	92.6	81.3	91.8	81.6	87.28
RNF130	98.8	97.8	97.4	98.9	98.4	98.3	99.5	97.8	98.1	97.4	98.24
APPBP2	99.8	99.8	98.6	99.8	100	98.8	100	98.8	100	98.8	99.44
DLGAP5	81.2	80.8	57.8	84.2	83.2	56.1	86.4	54.9	87.3	57.2	72.91
SHISA4	100	100	87.1	93	99.3	78.9	98.7	79.6	99.3	78.9	91.48
UTP11	96.4	96.4	88.1	96.4	98.4	88.5	99.2	88.5	98.4	88.9	93.92
IZUMO2	81.6	78.2	65.9	77	76	43.8	77.8	48.9	75.7	49.5	67.44
RBM41	94	91.7	82.1	92.4	92.9	82.5	93.6	87.8	98.8	88.5	90.43
PPARGC1A	95.6	88.4	91.2	93.4	88.2	91.5	94.8	83.5	85.7	89	90.13
SH3KBP1	93.8	92.8	88.9	99	92.9	85.5	94.3	82.8	97.9	82.1	91
ABCA4	93.3	94.2	86.6	94.5	94.6	86.4	95.1	87.9	96.4	87.3	91.63
TMEM191C	78.6	81.5	80.1	87.8	81.7	74.2	65.2	82.8	77.4	67.1	77.64
PYROXD2	89.5	90	83.1	90.9	89.8	83.5	93.2	81.6	90.6	83.1	87.53
EMG1	97.7	97.7	87.9	99.1	98	88.1	98.8	88.5	98.8	89.3	94.39
UPF2	99.4	99.1	95.2	98.2	98.9	95.2	97.9	95	97.5	95.8	97.22
MBLAC1	86.6	84.4	72.5	83.5	92.3	78.3	95.1	80.3	93.5	79.1	84.56
DHX58	90.6	91.1	75.7	91.3	91.5	74.7	94.2	75.7	92.5	75	85.23
DENND2C	90	92.7	78.8	91.9	94	80.7	93.5	79.9	94.7	81	87.72
GRP	76.1	78.8	62.2	77	82.8	61.2	80.8	57.9	79.5	57.1	71.34
ASXL3	89.1	88.9	77.9	88.8	88.3	75.7	93	78	87.7	74.1	84.15
SLFNL1	74.1	73.3	63.7	70.7	85.7	73	84.6	67.9	73.6	66.7	73.33
ZNF76	54.3	54.9	48.5	54.5	96.5	89.6	96.3	89.8	96.8	88.8	77
GTDC1	91.8	88.7	77.3	97.6	88.1	77	96.7	73.8	83.7	88.9	86.36
LRIT2	77	80.7	66.8	79.8	88.5	70	87.6	73.1	90.2	70.3	78.4
SEMA6C	84.1	85.7	75.5	91.8	91.1	75.9	93	75.5	94.8	81.5	84.89
RPH3AL	89.1	90.7	83.7	99.3	93.4	83.1	98.6	85.4	98	93.9	91.52
URB1	86.5	88.7	74.1	93.3	88	73.1	95	73.5	93.5	82.4	84.81
TDRD5	89.2	90.5	79.2	84.5	90.8	78.6	86.9	79.4	87.3	76.2	84.26
CPS1	97.5	97.6	95.9	98.3	97.5	95.7	98.4	95.9	98	96.2	97.1
STOML3	95.3	93.2	91.7	94.2	96	90.2	97.3	91.7	95.3	89.5	93.44
TNFRSF18	68.6	82.6	48.4	80.5	82	43.9	80	49.6	80	47.6	66.32
DDX55	89	93.2	87.3	93.5	90.7	83.8	91.5	88	95.3	89.3	90.16
HSPA12B	98.4	85.3	93.1	98.9	85.2	93.4	98.9	80.7	83	93.7	91.06
CCDC65	94	89.8	81.2	84.3	89.6	82.2	85.9	77.2	80.1	73.7	83.8
NUBP2	92.9	94.8	86.1	92.1	96.3	85	95.5	86.9	95.9	85.1	91.06
TDRD12	86.1	87.5	69.4	87.3	88	68.6	90.9	69.7	89.1	68.2	80.48
SELENOS	96.8	96.3	82.4	94.5	96.8	83	95.7	82.4	93.9	81.7	90.35
CD83	68.1	77.4	63.3	69.6	86	64.4	86.9	62.1	86.6	66.8	73.12
KMT2A	85.4	94.3	87.8	93.6	88.9	81	87.5	88	95.6	90.4	89.25
ENPP7	87.3	81.5	82.4	90.8	79.6	82.2	91.6	74.4	80.2	80.8	83.08
WDR38	92.8	54.8	75.4	52.7	68.4	85.3	95.5	61.4	69.9	86.1	74.23
DNAJB4	98.8	99.4	92.9	99.1	99.4	92	99.7	92.6	99.7	92.3	96.59
SHC2	84.4	82.6	77.8	94.1	92.5	77.5	92.4	77.5	93.1	87.3	85.92
CCDC117	87.7	87.1	63.5	91.3	87.4	65	93.9	65.1	91.7	67.1	79.98
KIF19	94.9	91.9	85.7	96.4	93	86.1	96.6	86.8	95.1	90.8	91.73
BOD1	99.3	99.3	95.1	99.3	100	95.8	100	95.8	100	95.8	98.04
CXXC1	95.2	98.6	84.8	93.4	95.9	86.8	97.3	85.6	93.6	85.8	91.7
RIC3	90.5	89.7	84.8	90.8	87.2	82.9	92.1	82.1	87.6	82.9	87.06
ROR2	84.2	93.6	86.5	87.5	88.3	83.9	92.4	90	92	86.8	88.52
UBTD2	100	89.8	95.7	99.5	100	95.3	99.5	86.1	99.5	94.7	96.01
APOLD1	69.8	77.6	85.8	73.3	89.8	65.9	92.7	74.4	94.7	72.4	79.64
COMMD2	82.9	83.8	79.5	83.8	99	94.5	98	94.5	99	94	90.9
RPE65	98.3	98.9	93.8	98.1	99.4	94	99.4	94.2	99.2	93.8	96.91
NEFM	60.7	61.3	60.3	57.1	99.6	98.3	96.6	96.4	96.1	94.8	82.12
DIXDC1	93.5	96	89.3	97.2	94.5	87.7	96.7	87.6	92.2	86.1	92.08
MORC3	96.1	96.7	78.9	95.2	96.9	73.9	97.1	78.7	96.2	77.4	88.71
OLIG3	99.6	99.4	98.5	98.6	99.4	98.1	99.1	98.3	100	97.3	98.83
CD37	92.6	86.5	76.3	82.8	89.4	78.1	92.8	72.1	91.7	74.7	83.7
STAT2	82.9	84.7	72.5	80.3	86.3	71.7	89.5	73.6	86.9	72.5	80.09
MDH1B	81.7	87.9	68.9	89.7	86.5	69.1	89.5	68.7	92.2	70.1	80.43
RASGEF1A	98.5	94.6	89.9	97.8	96.5	90.8	98.9	88	95.8	90.1	94.09
TSHB	97.8	95.7	82.6	89.2	96.4	81.2	88.3	79.7	85.8	77.3	87.4
PLAGL1	98.5	99.1	37.6	98.7	98.1	37.6	98.1	37.6	98.3	37.8	74.14
FBXO7	83.9	89.5	74.4	88.5	85.9	69.5	86.4	76	92.2	75.2	82.15
BYSL	93.1	94.7	89.2	95.7	94.3	89.7	95.9	91.3	96.8	91.1	93.18
BCAT1	90.6	91.3	80.3	89	95.1	83.8	97.1	76	96.6	84.5	88.43
MARCHF6	96.9	99.3	97.8	99.3	96.2	95.4	96.3	97.2	99.8	97.1	97.53
KL	91.6	92.8	87.6	91.6	95.9	86.6	95.5	87.6	95	85.1	90.93
ADAMTS4	92.6	93.2	86.8	90.8	96.1	89	94.5	88.9	94.9	86.9	91.37
HNRNPUL1	99.3	97.3	95.7	97.7	96.8	95.2	97.3	94	95.4	95.7	96.44
CLP1	100	100	99.1	100	100	99.1	100	99.1	100	99.1	99.64
EMC4	99.5	99.5	97.3	99.5	100	97.8	100	97.8	100	97.8	98.92
KCNJ16	97.1	97.4	93.3	97.6	96.2	91.9	97.1	92.1	96.4	92.1	95.12
CCDC151	82.4	80.9	65.3	76.5	85.3	66.3	84.1	62.7	85.4	60	74.89
ENTPD6	96.1	76.6	85.7	96.1	77.3	85.1	96.1	68.7	76.6	85.1	84.34
RBKS	90.4	94	84.6	93.2	92.8	83	92.8	83.1	89.2	82.3	88.54
AREG	93.3	84.4	59.8	89.7	87.9	62.4	91.9	68.9	87.9	64.5	79.07
CLPB	87.3	94.2	86.1	99.3	87.1	79.3	99.6	88.4	99.1	96.5	91.69
ART1	86	91	76.6	91.5	88.2	76.2	91.5	77.9	94	78.2	85.11
TOPAZ1	87.4	89.6	71.4	83.6	87	66.9	80.7	68.4	83.3	61	77.93
ZC3H12C	80.8	90	88.6	90	85.2	80.6	85.4	88.4	90.2	88.4	86.76
ATP13A1	97.6	98	94	98	98.8	95	99	94.6	99.1	94.6	96.87
C12H12orf43	83.3	76.9	70.7	85.6	75.7	67.2	76.8	58.6	75.4	67.6	73.78
TAFA2	100	99.2	96.9	93.3	99.2	96.9	93.3	96.2	93.3	97.9	96.62
FERMT1	95.1	96.6	87	94.2	96.6	87.1	94.2	87.6	96.1	85.4	91.99
LYSMD2	96.8	94.4	74.2	93.5	96	77.4	95.2	83.3	92.7	76.6	88.01
BAHD1	95.3	96.6	87.6	95.7	95.5	87.1	96.5	87.9	95.5	87.9	92.56
PDLIM2	88.1	85.4	74.7	74.8	88.8	77.4	93.8	75	88	76	82.2
ANKRD50	99.4	99.1	95.2	99.6	99.2	95.2	99.6	95	99.2	95	97.65
PGRMC2	98.9	97.7	96	98.2	98.2	94.4	98.8	85.7	98.2	94.7	96.08
P3H1	90.8	90.6	87.5	94.9	96.5	87.4	97.4	86.6	96.4	89.8	91.79
RAB17	84	86.8	72.9	87.4	89.7	70.8	89.2	72.9	91	70.3	81.5
ATP6V0A2	97	97.2	88.8	96.5	97.9	89.7	97.2	89.6	97.1	89.3	94.03
FRS2	99.6	99.6	94.5	99.8	99.2	94.5	99.8	94.3	99.4	94.5	97.52
RASGRP1	95.4	92.6	85.8	95.4	96.4	90.6	97.7	90.3	97.3	90.4	93.19
RBBP5	100	98.5	97.7	98.7	98.4	98	100	96.3	97.2	96.5	98.13
OPALIN	90.8	83.8	65	90.7	81.7	63.6	90.8	75.5	84.4	67.6	79.39
RSPH9	95.5	93.9	86.1	84.3	87.5	88.4	89.5	80.5	80	79.8	86.55
SAPCD1	75.9	65.3	72.7	68.5	74	64.6	81.5	71.2	55.9	67.3	69.69
RIPK4	95.1	97	88	96.2	94.7	84.5	95.9	88	95.7	86.1	92.12
CLIP4	94.5	93.5	80.3	92.2	94.7	78.1	95.1	81.2	91.7	76.5	87.78
CLEC4G	84.8	87	62.1	85	90.7	64.5	91.1	65.2	90.8	63.1	78.43
MPHOSPH10	87.6	91.9	77.7	89.7	89.9	76.8	86.9	76.3	92.8	75.1	84.47
EXOC8	98.8	99	92.5	98.6	99	92.8	99	92.6	99.3	92.4	96.4
EBNA1BP2	97.4	96.4	85.5	94.4	99.3	87.3	97.4	86.5	97.4	84.9	92.65
CIAO1	97.9	98.8	94.7	99.7	97.3	93.2	97.6	94.4	98.5	94.4	96.65
MEAK7	83.5	81.8	64	83.9	86	63.4	87.9	61.7	84.1	64.4	76.07
EPS8L3	72.2	84.8	68.4	71.1	76.2	64.4	69.5	72.3	75.7	64.5	71.91
TMEM74B	89.6	92.7	87.9	94.8	90.4	87.7	92.8	88.8	94.4	88.8	90.79
MTHFR	96.2	97.2	90.3	96.2	96.6	91.1	94.7	89.5	94.6	87	93.34
CD2AP	94.6	91.4	86.5	91.2	92.9	83.6	93.1	81.8	92.8	81.8	88.97
SLC39A6	97.4	93.8	83.6	96.9	93.4	83	97.1	79.9	92.4	82.1	89.96
VAC14	97.2	97.6	94	92.5	96.9	93.5	93.4	94.1	92.1	88.9	94.02
OSGIN1	90	92.9	82.6	91.4	90.8	80.3	91.8	80.1	90	81	87.09
C3H5orf15	89.8	79.6	54.4	81.6	80	52.8	84.6	60.5	87.3	58	72.86
GM2A	57.4	62.2	62.8	72	59.9	54.3	62	62.8	69.7	64.2	62.73
PMEPA1	96.5	96	86.5	97	98.3	87.2	97.8	87.2	96.9	86.8	93.02
PTPN6	92.2	93.1	89.7	92.8	99	94.3	98.4	94.1	99.1	95.3	94.8
WDR86	96.4	84.2	91.2	94	83.6	90.7	93.4	74.2	90.1	84.3	88.21
CHRM5	93.2	92.7	83.1	94	95.1	84	97	85	95.9	85	90.5
CHID1	93.5	92.2	90.2	93	89.8	86.3	87.1	83.9	86.5	82.6	88.51
VASN	89.5	91.3	84.5	87.9	90.1	79.8	89.2	81.7	89.2	79.7	86.29
EIF2AK2	73.4	77.8	54	70.1	82	51.7	75.4	51.2	77.6	51.5	66.47
MSANTD1	96.1	93.5	90	97.7	96.5	88.4	97.3	89.2	93.9	90	93.26
RAB3GAP2	95.3	96.7	88.1	96.1	96.2	88.3	96.6	88.3	97	88.5	93.11
[truncated: 8,123 more rows]

## Sheet: Table S5
Table S5 Normalized expression levels of 306 convergent DEGs in stomach samples of two panda species
	cfa_7018	cfa_7045	cfa_7050	mmu_1443	mmu_1444	mmu_1445	mmu_1890	aml_9775	aml_JV	aml_WE	mpf_W1	mpf_W2	mpf_W3	afu_5808	afu_5809	afu_5815
DDX51	11.9689	8.75022	9.81291	18.4608	16.6916	14.6351	15.4138	88.376	75.1403	62.6447	17.05	19.6102	24.0604	48.8913	33.6138	43.4837
C16H11orf95	4.75191	7.98187	5.52599	11.3277	14.9597	14.0757	18.2799	102.134	143.128	64.4308	10.0148	5.87519	6.518	45.1566	37.5935	18.5589
HFE	5.5157	12.5306	7.39764	15.6949	17.2582	19.85	11.1995	82.7832	135.006	76.5667	5.40228	6.36459	7.73504	40.0149	28.4813	34.9358
IL4R	31.325	50.066	54.5327	40.0584	40.6862	35.9318	35.8746	444.941	304.936	244.079	72.1682	89.2258	79.0236	178.055	163.845	178.964
TFDP1	25.8082	20.2087	10.9115	97.7138	90.1638	79.847	89.2875	415.813	627.802	358.796	85.2013	70.9628	88.6746	335.45	458.088	78.498
ERF	23.5797	27.4911	21.5056	42.5757	55.0211	40.5285	51.7844	166.299	154.03	130.84	18.8976	20.4965	21.4681	80.6829	147.341	69.0209
BTG2	7.74974	9.69975	11.9089	408.232	426.463	325.144	274.527	890.538	646.09	1410.8	27.9404	91.4862	25.5914	181.725	585.093	1951.66
LOC100478510	8.98928	18.447	17.867	54.804	52.875	44.952	73.3872	86.7017	155.272	90.399	47.4351	42.0604	58.2608	100.593	98.5761	77.2688
TERF1	15.5147	11.6231	11.4517	19.3029	15.7732	18.0928	14.299	98.778	58.7316	106.971	18.4816	15.2757	15.8891	38.1935	77.5642	41.9517
PLEKHB1	19.9811	8.49103	21.0879	32.3628	45.4167	40.2173	36.2045	211.543	234.195	133.72	52.8366	42.9726	32.3652	147.419	85.4237	49.2003
CXHXorf56	20.2059	18.4063	13.9958	22.4857	22.4064	23.0113	22.6636	78.9325	67.6816	57.6924	15.5871	17.6374	16.2737	43.8839	49.1738	49.0949
ACBD6	12.4668	20.9454	21.0472	10.8718	12.0647	11.2975	20.5127	111.145	93.2231	113.804	18.8976	19.8858	25.6086	112.122	72.8058	106.528
PRKAG3	0.162224	1.04555	0.393935	0.311892	0.486075	0.568662	0.479335	9.45875	27.5365	10.6891	2.23756	1.75022	1.43589	10.5184	14.8946	18.8015
MYCL	20.4811	25.5859	25.2146	5.66204	6.82069	6.17519	12.311	263.133	161.238	404.407	11.0404	9.55317	13.1458	115.187	151.555	47.5432
DUSP8	4.58754	6.74461	3.03209	12.1977	9.10586	9.84956	7.9125	44.582	50.6633	46.4925	15.1647	6.4701	5.25448	20.5296	27.7759	38.2093
HTR1F	1.2621	1.2589	1.34086	0	0.0385535	0.0369032	0	29.4404	17.7277	14.4401	7.8661	6.32867	6.24098	28.9611	18.4219	8.87457
SMYD1	0	0.08172	0	1.35493	1.59665	0.66994	0.711762	5.11861	1.82269	4.92572	1.37349	0.429739	1.5705	6.26474	4.3469	7.12438
FAM221A	3.59417	2.34852	1.003	10.0326	10.0153	8.97822	2.98236	42.4686	26.5484	29.7792	3.40575	2.66398	2.54318	38.6703	87.7982	46.5551
UCKL1	18.4056	25.6274	40.2227	67.5243	58.5106	56.7462	57.0002	110.974	196.794	125.249	69.412	90.5539	86.1016	196.228	158.209	153.788
MAF1	63.7931	119.283	96.1335	87.6482	104.088	91.7799	137.198	764.525	651.499	555.497	140.49	156.975	166.658	219.006	471.921	172.098
IER2	83.8571	44.9885	165.352	152.967	140.597	135.891	238.757	1093.67	735.337	1184.02	219.352	192.155	201.244	478.24	398.414	992.837
WDR37	12.0764	8.4266	5.39992	11.4174	10.3375	9.40768	8.17686	72.7529	43.5762	43.4625	25.3672	23.5294	19.9642	71.342	54.5886	31.0053
PASK	2.62804	2.09709	3.94303	2.68487	2.4144	2.4056	1.52595	14.1638	30.7985	21.5846	2.85741	3.47149	3.72407	7.98798	4.27261	7.9685
DNASE2B	0.11344	0	0	0.149676	0.0356378	0.102337	0	6.70359	2.20677	4.12332	1.37641	1.53804	0.32119	5.33659	3.51927	9.35518
ACYP2	6.64502	15.8299	10.3734	33.6302	34.1033	28.7836	26.5861	51.291	51.506	46.5544	6.26214	5.14732	6.84826	64.8623	92.9265	53.4512
GLTPD2	0.27142	0.49981	0.0617906	0.161358	0.153678	0.294199	0	12.3356	19.4749	6.43685	0.629678	0.492535	0.514281	8.56386	1.52886	9.58719
CATSPER2	2.35657	2.91797	4.55092	2.20382	2.07201	3.06512	2.14942	14.9557	74.6212	30.6714	2.89925	2.18058	2.73222	16.4082	7.86316	10.3203
MTX1	35.8803	32.8185	59.8299	39.0039	44.1385	37.7613	36.0303	172.96	152.755	132.154	34.0539	39.2052	52.4923	176.042	214.355	170.572
FMO4	4.78069	4.17007	4.60547	0.535089	0.563264	0.693197	0.317401	17.5755	28.5795	18.5296	1.00912	2.63111	2.06046	18.8665	16.8125	13.9374
MARVELD3	3.00876	7.23662	6.15072	8.01111	7.32702	5.91211	12.2713	52.2845	39.111	24.2456	1.93856	2.92036	2.87338	21.0828	27.6119	11.4844
EGR1	27.7497	39.0325	29.5087	39.9295	44.2155	65.0337	38.1138	1214.93	819.519	1657.44	56.7389	25.4938	30.8644	14.1834	99.9117	476.459
PRRG4	3.47662	3.29519	1.25705	2.50689	1.91633	4.30009	2.78817	56.9647	27.603	29.7188	11.2663	2.31371	3.48168	43.8432	134.279	57.3302
ABCC6	0.160543	0.492726	0.828441	0.255477	0.312835	0.31608	2.31373	5.78631	24.8602	8.94929	2.32858	1.86695	2.13956	5.94384	8.29434	7.82296
SLC5A11	0.0559867	0.206195	0.280407	0.49209	0.252359	0.828194	1.06654	3.11057	15.4992	5.48527	0	0.331885	0	4.17102	1.53762	1.77441
NUDT15	36.3464	23.3479	22.3989	1.72102	1.30572	1.14346	4.52035	90.0583	129.946	103.954	15.1365	12.5574	17.6073	91.2301	88.2001	82.1693
LOC100467394	0	0	0.0562755	0	0.0134165	0.0642109	0.0793825	2.90528	2.13364	2.21603	0.271924	0.0265874	0.111045	10.9686	10.5471	3.59871
CBX4	18.3577	8.78227	13.7272	12.3435	16.3935	16.3494	27.4956	63.2286	70.1146	65.5532	27.3897	34.0935	27.7477	71.1966	129.13	52.7385
KIF15	9.78416	0.977907	2.57913	4.45258	4.62861	5.19049	3.55011	61.3281	51.6302	40.2372	4.62118	7.82659	7.45011	25.7906	41.9407	16.8871
TSPAN15	160.474	104.681	222.516	211.604	219.892	186.171	190.086	614.598	795.949	575.606	223.899	306.642	298.879	618.601	1061.75	601.555
JUNB	134.269	79.2144	225.981	249.714	237.498	212.864	388.3	1668.13	3522.12	2766.12	350.774	634.541	297.88	392.451	432.159	2922.18
[truncated: 266 more rows]

## Sheet: Table S6
Table S6 Normalized expression levels of 150 convergent DEGs in small intestine samples of two panda species
[truncated: 151 more rows]

## Sheet: Table S7
Table S7 Significantly enriched GO categories for up-regulated convergent DEGs in stomach samples of two panda species
[truncated: 9 more rows]

[truncated: 11 more sheets: Table S8, Table S9, Table S10, Table S11, Table S12, Table S13, Table S14, Table S15, Table S16, Table S17, Table S18]
